# Supplementary material for: Base-mediated ketenimine formation from N-sulfonylthioimidates for the synthesis of 5-amino-1-vinyl/aryl-1,2,3-triazoles
Source: Royal Society of Chemistry journal article supplement (doi:10.1039/d2cc06708k), 2023-01-01

## Supporting Information

### Base-Mediated Ketenimine Formation from *N*-Sulfonylthioimidates for the Synthesis of 5-Amino-1-Vinyl/Aryl-1,2,3-Triazoles

Wan-Yu Chen, Wei-Han Lin, Chia-Jou, Kuo, Chien-Fu Liang\*

Department of Chemistry, National Chung Hsing University, Taichung 402, Taiwan

E-mail: [lcf0201@dragon.nchu.edu.tw](mailto:lcf0201@dragon.nchu.edu.tw)

#### Table of contents

|                                                                                    |     |
|------------------------------------------------------------------------------------|-----|
| 1. General Information.....                                                        | S2  |
| 2. Optimized Conditions.....                                                       | S3  |
| 3. General Procedure.....                                                          | S4  |
| 4. X-ray Data and Characterization Data of compounds <b>3aa</b> and <b>6</b> ..... | S6  |
| 4. Characterization Data.....                                                      | S8  |
| 5. References.....                                                                 | S40 |
| 6. Copies of <sup>1</sup> H and <sup>13</sup> C NMR Spectra of products.....       | S41 |

## General information

All reactions were performed under nitrogen atmosphere.  $^1\text{H}$  NMR and  $^{13}\text{C}$  NMR spectra were reported on Varian 400 MHz and Jeol 400 MHz NMR spectrometer with  $\text{CDCl}_3$ 、 $\text{CD}_3\text{OD}$ 、 $d_6$ -DMSO、 $d_6$ -acetone as the solvent. Chemical shifts were reported in parts per million (ppm) relative to residual solvent peak ( $\text{CDCl}_3$   $\delta$  H = 7.26 ppm,  $\delta$  C = 77.16 ppm;  $\text{CD}_3\text{OD}$   $\delta$  H = 3.31 ppm,  $\delta$  C = 49.15 ppm;  $d_6$ -DMSO  $\delta$  H = 2.49 ppm,  $\delta$  C = 39.15 ppm;  $d_6$ -Acetone  $\delta$  H = 2.05 ppm,  $\delta$  C = 29.92 ppm) and were used as internal standard,  $\alpha,\alpha,\alpha$ -trifluorotoluene in deuteron benzene ( $\delta$  -63.9 ppm in  $^{19}\text{F}$  NMR). The IR spectra were measured on a Thermo Scientific Nicolet ATR-Diamond. Thin layer chromatography (TLC) was performed on pre-coated glass plates of Silica Gel 60 F<sub>254</sub> (0.25 mm, E. Merck); TLC plates were visualized under UV light (254 or 365 nm) and by treatment with potassium permanganate ( $\text{KMnO}_4$ ) or phosphomolybdic acid staining solution followed by heating. Flash column chromatography was carried out by using Silica Gel 60 (230–400 mesh, E. Merck). High resolution mass spectrometry (HRMS) data were recorded on an EI spectrometer. Melting points were measured by Electrothermo (UK) “Mel- emp” type melting point apparatus and are uncorrected. The following abbreviations were used to indicate splitting patterns of multiplicities: s = singlet, d = doublet, t = triplet, q = quartet, quin. = quintet, sext = sextet, dd = doublet of doublets, dt = doublet of triplets, td = triplet of doublets, ddd = doublet of doublet of doublets, brs = broad single, m = multiplet. Coupling constants ( $J$ ) are reported in Hz. Yields of products refer to chromatographically purified products unless otherwise stated. All terminal alkyne and thiol reagents were purchase from Sigma Aldrich, Alfa Aesar, Merck, or TCI. The compounds **1a'** and **1a''** were prepared by our previous work.<sup>1</sup> All vinyl azides (**2a-2i**)<sup>2</sup> and aryl azides (**4a-4i**)<sup>3</sup> were known compounds and synthesized by reported methods.<sup>2-3</sup> All these compounds were used as received, unless otherwise stated.

**Table S1. Optimized Conditions**

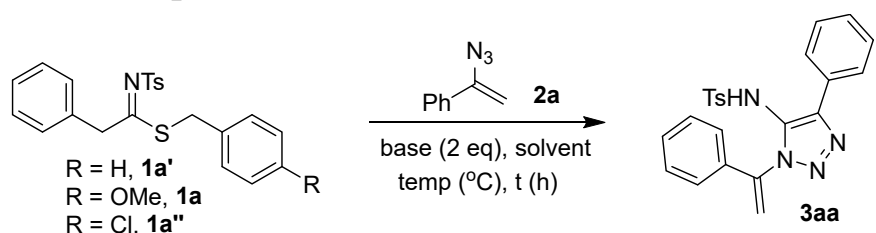

$\text{R} = \text{H}, \mathbf{1a'}$   
 $\text{R} = \text{OMe}, \mathbf{1a}$   
 $\text{R} = \text{Cl}, \mathbf{1a''}$

| entry | <b>2a</b> (equiv) | base                            | solvent     | time(h) | temp (°C) | yield <sup>a</sup> |
|-------|-------------------|---------------------------------|-------------|---------|-----------|--------------------|
| 1     | 2                 | DBU                             | THF         | 12      | 50        | 33%                |
| 2     | 2                 | DBU                             | ACN         | 12      | 50        | 31%                |
| 3     | 2                 | DBU                             | 1,4-Dioxane | 12      | 50        | 25%                |
| 4     | 2                 | DBU                             | Toluene     | 12      | 50        | 23%                |
| 5     | 2                 | DBU                             | DMF         | 12      | 50        | 44%                |
| 6     | 2                 | DBU                             | DMF         | 6       | 50        | 50%                |
| 7     | 2                 | —                               | DMF         | 12      | 50        | — <sup>b</sup>     |
| 8     | 3                 | DBU                             | DMF         | 6       | 50        | 60%                |
| 9     | 3                 | K <sub>2</sub> CO <sub>3</sub>  | DMF         | 6       | 50        | 55%                |
| 10    | 3                 | Cs <sub>2</sub> CO <sub>3</sub> | DMF         | 6       | 50        | 62%                |
| 11    | 3                 | K <sub>3</sub> PO <sub>4</sub>  | DMF         | 6       | 50        | 66%                |
| 12    | 3                 | K <sub>3</sub> PO <sub>4</sub>  | DMSO        | 6       | 50        | 73%                |
| 13    | 3                 | K <sub>3</sub> PO <sub>4</sub>  | DMSO        | 6       | 80        | 80%                |
| 14    | 3                 | K <sub>3</sub> PO <sub>4</sub>  | DMSO        | 6       | 90        | 78%                |
| 15    | 1.5               | K <sub>3</sub> PO <sub>4</sub>  | DMSO        | 6       | 80        | 40%                |
| 16    | 3                 | K <sub>3</sub> PO <sub>4</sub>  | DMSO        | 6       | 80        | 47% <sup>c</sup>   |
| 17    | 3                 | K <sub>3</sub> PO <sub>4</sub>  | DMSO        | 6       | 80        | 85% <sup>d</sup>   |
| 18    | 3                 | K <sub>3</sub> PO <sub>4</sub>  | DMSO        | 6       | 80        | 58% <sup>e</sup>   |

Reaction conditions: **1a'** (1.0 equiv), **2a**, and base (2.0 equiv) under nitrogen atmosphere. <sup>a</sup> Isolated yield. <sup>b</sup> No desired product formation, only starting material **1a'** was recovered. <sup>c</sup> K<sub>3</sub>PO<sub>4</sub> was used 1.5 equiv in reaction conditions. <sup>d</sup> Use of **1a** as substrate (R = OMe). <sup>e</sup> Use of **1a''** as substrate (R = Cl)

### **General Procedure I: For *N*-sulfonylthioimide (1) synthesis<sup>1</sup>**

To a solution of phenyl acetylene (50.0 mg, 0.489 mmol, 1.0 equiv) in DCM (1.6 mL) was added *p*-toluenesulfonyl azide (116.0 mg, 0.587 mmol, 1.2 equiv), DMAP (60.0 mg, 0.489 mmol, 1.0 equiv) and CuI (19.0 mg, 0.098 mmol, 0.2 equiv). The resulting solution was stirred at room temperature under nitrogen atmosphere for 1 h. Then 4-methoxybenzyl thiol (227.0 mg, 1.467 mmol, 3.0 equiv) was added to the reaction mixture and stirred for several hours until the reaction was complete as indicated by TLC. The mixture was extracted with DCM for three times and the combined organic phase was washed with brine, dried over MgSO<sub>4</sub>, filtered and concentrated. The crude products were purified by flash column chromatography to afford the desired product **1a** (153.8 mg, 74%) as a yellow solid. The products of **1b-1l** were synthesized by following general procedure I

### **General Procedure II: For 5-amino-1-vinyl-1,2,3-triazole (3) synthesis**

To a solution of thioimide **1a** (50.0 mg, 0.117 mmol, 1 equiv) and potassium phosphate (51.0 mg, 0.235 mmol, 2 equiv) in DMSO (0.39 mL) was added vinyl azide **2a** (51.0 mg, 0.351 mmol, 3 equiv), the resulting reaction mixture was stirred at 80 °C under nitrogen atmosphere for several hours until the reaction was completed as indicated by TLC. The mixture was extracted with DCM for three times and the combined organic phase was washed with 2N HCl solution and brine, dried over MgSO<sub>4</sub>, filtered and concentrated. The crude product was purified by flash column chromatography to afford the desired products **3aa** (41.4 mg, 85%) as a white solid. The products of **3ba-3la**, **3ab-3ai**, **3cb-3cc**, and **3hb-3hc** were synthesized by following general procedure II.

### General Procedure III: For 5-amino-1-aryl-1,2,3-triazole (5) synthesis

To a solution of *N*-sulfonylthioimide **1a'** (100.0 mg, 0.253 mmol, 1 equiv) and potassium phosphate (107.4 mg, 0.506 mmol, 2 equiv) in DMSO (0.84 mL) was added azidobenzene **4a** (90.3 mg, 0.759 mmol, 3 equiv), the resulting reaction mixture was stirred at 80 °C under nitrogen atmosphere for 8 hours until the reaction was completed as indicated by TLC. The mixture was extracted with DCM for three times and the combined organic phase was washed with 2N HCl solution and brine, dried over MgSO<sub>4</sub>, filtered and concentrated. The crude product were purified by flash column chromatography to afford the desired products **5aa** (69.2 mg, 70%) as a white solid. The products of **5ab-5ai** were synthesized by following general procedure III.

### X-ray Crystallographic Studies and the X-ray Data of **3aa** and **6**

Single crystals of compounds **3aa** and **6** suitable for X-ray diffraction measurements were mounted on the Bruker D8 VENTURE and the unit cell was determined using Bruker SMART APEX 3 software suite to employ graphite-monochromated Mo-K $\alpha$  radiation ( $\lambda = 0.71073 \text{ \AA}$ ), and intensity data were collected with  $\omega$  scans. The data collection and reduction were performed with the CrysAlisPro software, and the absorptions were corrected by the SCALE3 ABSPACK multiscan method. The space-group determination was based on a check of the Laue symmetry and systematic absences, and it was confirmed using the structure solution. The structure was solved and refined with the Olex2 1.2-ac21 package. Anisotropic thermal parameters were used for all non-H atoms, and fixed isotropic parameters were used for H atoms. CCDC numbers of 2216076 for compound **3aa** and 2201717 for compound **6** contain the supplementary crystallographic data for this paper, respectively. Both of the checkCIF reports are given below:

**For compound 3aa, CCDC No: 2216076**

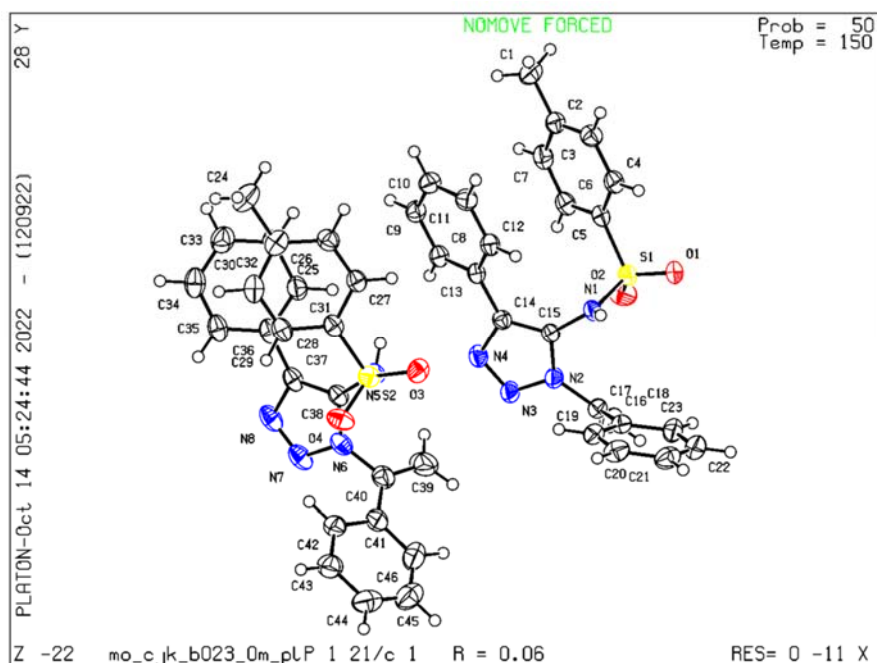

**Datablock: mo\_cjk\_b023\_0m\_pl**

Bond precision: C-C = 0.0053 Å      Wavelength=0.71076  
 Cell: a=11.4274 (6)      b=25.1111 (16)      c=14.2863 (10)  
       alpha=90      beta=91.378 (2)      gamma=90  
 Temperature: 150 K

|                        | Calculated      | Reported            |
|------------------------|-----------------|---------------------|
| Volume                 | 4098.3 (4)      | 4098.3 (4)          |
| Space group            | P 21/c          | P 1 21/c 1          |
| Hall group             | -P 2ybc         | -P 2ybc             |
| Moiety formula         | C23 H20 N4 O2 S | 2 (C23 H20 N4 O2 S) |
| Sum formula            | C23 H20 N4 O2 S | C46 H40 N8 O4 S2    |
| Mr                     | 416.49          | 832.98              |
| Dx, g cm <sup>-3</sup> | 1.350           | 1.350               |
| Z                      | 8               | 4                   |
| Mu (mm <sup>-1</sup> ) | 0.186           | 0.186               |
| F000                   | 1744.0          | 1744.0              |
| F000'                  | 1745.63         |                     |
| h, k, lmax             | 14, 31, 17      | 14, 31, 17          |
| Nref                   | 8410            | 8390                |
| Tmin, Tmax             |                 | 0.706, 0.745        |
| Tmin'                  |                 |                     |

Correction method= # Reported T Limits: Tmin=0.706 Tmax=0.745  
 AbsCorr = NONE

Data completeness= 0.998      Theta(max)= 26.404

R(reflections)= 0.0570 ( 5598)      wR2(reflections)=  
 0.2077 ( 8390)  
 S = 1.215      Npar= 543

## For compound 6, CCDC No: 2201719

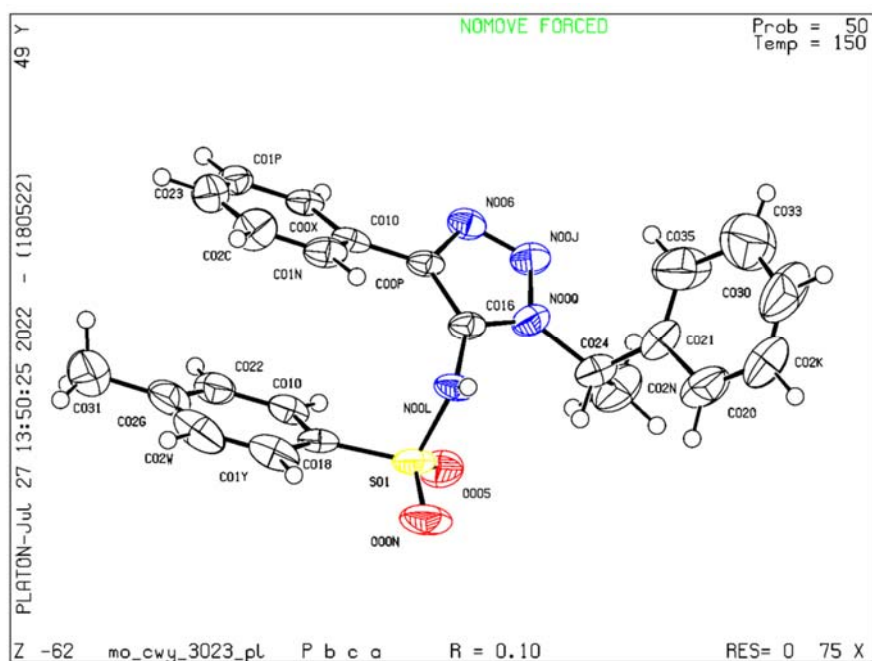

### Datablock: mo\_cwy\_3023\_pl

Bond precision: C-C = 0.0097 Å

Wavelength=0.71076

Cell: a=14.496(2) b=11.4484(18) c=25.707(5)

alpha=90 beta=90 gamma=90

Temperature: 150 K

|                        | Calculated      | Reported        |
|------------------------|-----------------|-----------------|
| Volume                 | 4266.2(12)      | 4266.2(12)      |
| Space group            | P b c a         | P b c a         |
| Hall group             | -P 2ac 2ab      | -P 2ac 2ab      |
| Moiety formula         | C23 H22 N4 O2 S | C23 H22 N4 O2 S |
| Sum formula            | C23 H22 N4 O2 S | C23 H22 N4 O2 S |
| Mr                     | 418.51          | 418.50          |
| Dx, g cm <sup>-3</sup> | 1.303           | 1.303           |
| Z                      | 8               | 8               |
| Mu (mm <sup>-1</sup> ) | 0.179           | 0.179           |
| F000                   | 1760.0          | 1760.0          |
| F000'                  | 1761.63         |                 |
| h, k, lmax             | 17, 13, 30      | 17, 13, 30      |
| Nref                   | 3753            | 3669            |
| Tmin, Tmax             |                 |                 |
| Tmin'                  |                 |                 |

Correction method= Not given

Data completeness= 0.978

Theta(max)= 24.995

R(reflections)= 0.0980 ( 2275)

wR2(reflections)=  
0.2433 ( 3669)

S = 1.007

Npar= 273

## Characterization Data:

### 4-Methoxybenzyl (*E*)-2-phenyl-*N*-tosylethanimidothioate (**1a**)<sup>1</sup>

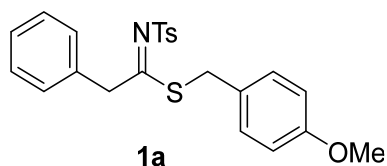

Following the General Procedure I, using phenylacetylene (50.0 mg, 0.489 mmol), tosyl azide (116 mg, 0.587 mmol) and 4-methoxybenzylthiol (227.0 mg, 1.469 mmol). The crude was purified by column chromatography (hexane/EtOAc, 5/1) to afford **1a** (153.8 mg, 74% yield) as a yellow solid ; <sup>1</sup>H NMR (400 MHz, CDCl<sub>3</sub>) δ 7.87 (d, *J*=8.2 Hz, 2H), 7.35-7.31 (m, 7H), 7.00 (d, *J* = 8.6 Hz, 2H), 6.71 (d, *J* = 8.6 Hz, 2H), 4.45 (s, 2H), 3.95 (s, 2H), 3.76 (s, 3H), 2.46 (s, 3H) ; <sup>13</sup>C NMR (100 MHz, CDCl<sub>3</sub>) δ 188.8 (C), 159.1 (C), 143.7 (C), 138.7 (C), 133.9 (C), 130.4 (CH×3), 129.6 (CH×2), 128.7 (CH×2), 127.8 (CH×2), 127.2 (CH×2), 127.1 (C), 114.0 (CH×2), 55.3 (CH<sub>3</sub>), 44.3 (CH<sub>2</sub>), 36.0 (CH<sub>2</sub>), 21.7 (CH<sub>3</sub>).

### 4-Methoxybenzyl (*E*)-2-(4-methoxyphenyl)-*N*-tosylethanimidothioate (**1b**)

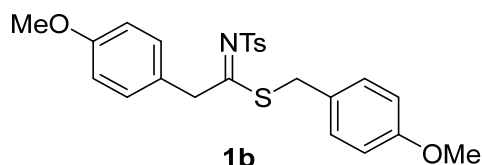

Following the General Procedure I, using 1-ethynyl-4-methoxybenzene (50.0 mg, 0.378 mmol), tosyl azide (90.0 mg, 0.454 mmol) and 4-methoxybenzylthiol (175.0 mg, 1.134 mmol). The crude was purified by column chromatography (hexane/EtOAc, 5/1) to afford **1b** (99.7 mg, 58% yield) as a white solid. m.p. 119-120 °C ; <sup>1</sup>H NMR (400 MHz, CDCl<sub>3</sub>) δ 7.88 (d, *J* = 8.2 Hz, 2H), 7.35 (d, *J* = 8.2 Hz, 2H), 7.24 (d, *J* = 8.6 Hz, 2H), 7.00 (d, *J* = 8.6 Hz, 2H), 6.86 (d, *J* = 8.6 Hz, 2H), 6.71 (d, *J* = 8.6 Hz, 2H), 4.38 (s, 2H), 3.93 (s, 2H), 3.79 (s, 3H), 3.75 (s, 3H), 2.46 (s, 3H) ; <sup>13</sup>C NMR (100 MHz,



CDCl<sub>3</sub>)  $\delta$  189.8 (C), 159.3 (C), 159.0 (C), 143.6 (C), 138.8 (C), 131.6 (CH $\times$ 2), 130.4 (CH $\times$ 2), 129.6 (CH $\times$ 2), 127.1 (CH $\times$ 2, C), 125.8 (C), 114.1 (CH $\times$ 2), 114.0 (CH $\times$ 2), 55.3 (CH<sub>3</sub> $\times$ 2), 43.6, (CH<sub>2</sub>) 36.1(CH<sub>2</sub>), 21.7 (CH<sub>3</sub>); IR (ATR)  $\nu$  2971, 2935, 2842, 1561, 1509, 1471, 1441, 1289, 1249, 1151, 1087, 1029 ; HRMS (EI)  $m/z$  : [M+H]<sup>+</sup> calcd. for C<sub>24</sub>H<sub>25</sub>NO<sub>4</sub>S<sub>2</sub>: 455.1225, found: 455.1234.

#### 4-Methoxybenzyl (*E*)-2-(*p*-tolyl)-*N*-tosylethanimidothioate (**1c**)

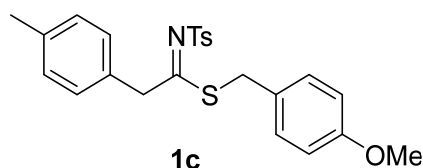

Following the General Procedure I, using 1-ethynyl-4-methylbenzene (50.0 mg, 0.430 mmol), tosyl azide (102.0 mg, 0.517 mmol) and 4-methoxybenzylthiol (199.0 mg, 1.291 mmol). The crude was purified by column chromatography (hexane/EtOAc, 5/1) to afford **1c** (98.2 mg, 52% yield) as a white solid. m.p. 108-110 °C ; <sup>1</sup>H NMR (400 MHz, CDCl<sub>3</sub>)  $\delta$  7.86 (d,  $J$  = 8.1 Hz, 2H), 7.34 (d,  $J$  = 8.2 Hz, 2H), 7.20 (d,  $J$  = 7.8 Hz, 2H), 7.13 (d,  $J$  = 8.1 Hz, 2H), 7.00 (d,  $J$  = 8.6 Hz, 2H), 6.70 (d,  $J$  = 8.6 Hz, 2H), 4.40 (s, 2H), 3.93 (s, 2H), 3.75 (s, 3H), 2.45 (s, 3H), 2.33 (s, 3H) ; <sup>13</sup>C NMR (100 MHz, CDCl<sub>3</sub>)  $\delta$  189.5 (C), 159.1 (C), 143.6 (C), 138.8 (C), 137.7 (C), 130.8 (C), 130.4 (CH $\times$ 2), 130.3 (CH $\times$ 2), 129.6 (CH $\times$ 2), 129.4 (CH $\times$ 2), 127.2 (CH $\times$ 2, C), 114.0 (CH $\times$ 2), 55.3 (CH<sub>3</sub>), 44.0 (CH<sub>2</sub>), 36.0 (CH<sub>2</sub>), 21.7 (CH<sub>3</sub>), 21.3 (CH<sub>3</sub>) ; IR (ATR)  $\nu$  3000, 2981, 2911, 1607, 1532, 1505, 1310, 1287, 1236, 1149, 1088, 1032 ; HRMS (EI)  $m/z$  : [M+H]<sup>+</sup> calcd. for C<sub>24</sub>H<sub>25</sub>NO<sub>3</sub>S<sub>2</sub>: 439.1276, found: 439.1268.

#### 4-Methoxybenzyl (*E*)-2-(3-methoxyphenyl)-*N*-tosylethanimidothioate (**1d**)

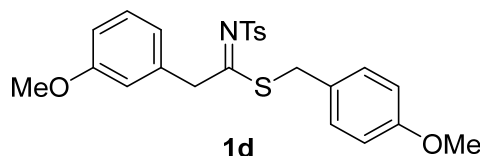

Following the General Procedure I, using 1-ethynyl-3-methoxybenzene (50.0 mg, 0.378 mmol), tosyl azide (90.0 mg, 0.454 mmol) and 4-methoxybenzylthiol (175.0 mg, 1.135 mmol). The crude was purified by column chromatography (hexane/EtOAc, 5/1) to afford **1d** (103.0 mg, 60% yield) as a white solid. m.p. 76-77 °C ; <sup>1</sup>H NMR (400 MHz, CDCl<sub>3</sub>) δ 7.86 (d, *J* = 8.3 Hz, 2H), 7.34 (d, *J* = 8.0 Hz, 2H), 7.24 (t, *J* = 7.8 Hz, 1H), 7.00 (d, *J* = 8.7 Hz, 2H), 6.90 (d, *J* = 7.6 Hz, 1H), 6.86-6.82 (m, 2H), 6.71 (d, *J* = 8.7 Hz, 2H), 4.40 (s, 2H), 3.95 (s, 2H), 3.78 (s, 3H), 3.76 (s, 3H), 2.46 (2, 3H) ; <sup>13</sup>C NMR (100 MHz, CDCl<sub>3</sub>) δ 188.3 (C), 159.6 (C), 158.9 (C), 143.5 (C), 138.5 (C), 135.1 (C), 130.2 (CH×2), 129.5 (CH), 129.4 (CH×2), 126.9 (CH×2, C), 122.5 (CH), 115.5 (CH), 113.8 (CH×2), 113.3 (CH), 55.1 (CH<sub>3</sub>×2), 44.1 (CH<sub>2</sub>), 35.6 (CH<sub>2</sub>), 21.5 (CH<sub>3</sub>) ; IR (ATR) ν 2964, 2912, 2841, 1610, 1583, 1552, 1511, 1488, 1313, 1265, 1247, 1154, 1079, 1047, 1029 ; HRMS (EI) *m/z* : [M+H]<sup>+</sup> calcd. for C<sub>24</sub>H<sub>25</sub>NO<sub>4</sub>S<sub>2</sub>: 455.1225, found: 455.1217

#### 4-Methoxybenzyl (*E*)-2-(naphthalen-2-yl)-*N*-tosylethanimidothioate (**1e**)

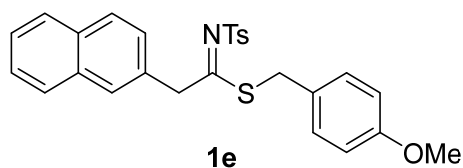

Following the General Procedure I, using 2-ethynyl-naphthalene (50.0 mg, 0.328 mmol), tosyl azide (78.0 mg, 0.394 mmol) and 4-methoxybenzylthiol (152.0 mg, 0.986 mmol). The crude was purified by column chromatography (hexane/EtOAc, 5/1) to afford **1e** (93.5 mg, 60% yield) as a white solid. m.p. 104-106 °C ; <sup>1</sup>H NMR (400 MHz, CDCl<sub>3</sub>) δ 7.89 (d, *J* = 8.2 Hz, 2H), 7.83-7.77 (m, 3H), 7.74 (s, 1H), 7.49-7.46 (m, 2H), 7.43 (dd,

$J = 8.4, 1.2$  Hz, 1H), 7.33 (d,  $J = 8.1$  Hz, 2H), 7.00 (d,  $J = 8.6$  Hz, 2H), 6.70 (d,  $J = 8.6$  Hz, 2H), 4.61 (s, 2H), 3.96 (s, 2H), 3.75 (2, 3H), 2.45 (s, 3H) ;  $^{13}\text{C}$  NMR (100 MHz,  $\text{CDCl}_3$ )  $\delta$  188.8 (C), 159.1 (C), 143.7 (C), 138.6 (C), 133.4 (C), 132.8 (C), 131.3 (C), 130.4 (CH $\times$ 2), 129.6 (CH $\times$ 2), 129.4 (CH), 128.4 (CH), 128.0 (CH), 127.9 (CH), 127.8 (CH), 127.2 (CH $\times$ 2), 127.1 (C), 126.4 (CH), 126.3 (CH), 114.0 (CH $\times$ 2), 55.3 (CH $_3$ ), 44.4 (CH $_2$ ), 36.1 (CH $_2$ ), 21.7 (CH $_3$ ) ; IR (ATR)  $\nu$  3234, 3058, 2911, 1722, 1550, 1510, 1440, 1300, 1245, 1157, 1081, 1034 ; HRMS (EI)  $m/z$  :  $[\text{M}+\text{H}]^+$  calcd. for  $\text{C}_{27}\text{H}_{25}\text{NO}_3\text{S}_2$ : 475.1276, found: 475.1270

#### 4-Methylbenzyl (*E*)-3,3-dimethyl-*N*-tosylbutanimidothioate (**1f**)<sup>1</sup>

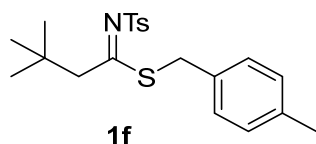

Following the General Procedure I, using 3,3-dimethylbut-1-yne (300.0 mg, 3.652 mmol), tosyl azide (864.0 mg, 4.382 mmol) and *p*-tolylmethanethiol (1515.0 mg, 10.956 mmol). The crude was purified by column chromatography (hexane/EtOAc, 5/1) to afford **1f** (298.4 mg, 21% yield) as a white solid.  $^1\text{H}$  NMR (400 MHz,  $\text{CDCl}_3$ )  $\delta$  7.84 (d,  $J = 8.3$  Hz, 2H), 7.31 (d,  $J = 8.3$  Hz, 2H), 7.00 (s, 4H), 4.05 (s, 2H), 3.10 (s, 2H), 2.45 (s, 3H), 2.30 (s, 3H), 1.14 (s, 9H) ;  $^{13}\text{C}$  NMR (100 MHz,  $\text{CDCl}_3$ )  $\delta$  187.3 (C), 143.4 (C), 139.1 (C), 137.3 (C), 132.6 (C), 129.5 (CH $\times$ 2), 129.3 (CH $\times$ 2), 128.9 (CH $\times$ 2), 127.1 (CH $\times$ 2), 50.3 (CH $_2$ ), 36.1 (CH $_2$ ), 32.5 (C), 30.5 (CH $_3\times$ 3), 21.7 (CH $_3$ ), 21.2 (CH $_3$ ).

#### 4-Methoxybenzyl (*E*)-2-(4-nitrophenyl)-*N*-tosylethananimidothioate (**1g**)

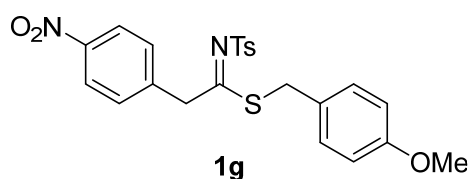

Following the General Procedure I, using 1-ethynyl-4-nitrobenzene (50.0 mg, 0.340 mmol), tosyl azide (80.0 mg, 0.408 mmol) and 4-methoxybenzylthiol (157.0 mg, 1.020 mmol). The crude was purified by column chromatography (hexane/EtOAc, 5/1) to afford **1g** (86.3 mg, 54% yield) as an orange solid. m.p. 110-111 °C ; <sup>1</sup>H NMR (400 MHz, CDCl<sub>3</sub>) δ 8.18 (d, *J* = 8.6 Hz, 2H), 7.85 (d, *J* = 8.3 Hz, 2H), 7.52 (d, *J* = 8.6 Hz, 2H), 7.35 (d, *J* = 8.2 Hz, 2H), 7.00 (d, *J* = 8.6 Hz, 2H), 6.72 (d, *J* = 8.6 Hz, 2H), 4.53 (s, 2H), 3.99 (s, 2H), 3.76 (s, 3H), 2.46 (s, 3H) ; <sup>13</sup>C NMR (100 MHz, CDCl<sub>3</sub>) δ 185.4 (C), 159.2 (C), 147.5 (C), 144.1 (C), 141.5 (C), 138.2 (C), 131.0 (CH×2), 130.4 (CH×2), 129.7 (CH×2), 127.2 (CH×2), 126.6 (C), 123.9 (CH×2), 114.1 (CH×2), 55.4 (CH<sub>3</sub>), 43.7 (CH<sub>2</sub>), 36.2 (CH<sub>2</sub>), 21.7 (CH<sub>3</sub>) ; IR (ATR) ν 2926, 2855, 1557, 1343, 1316, 1243, 1149, 1086, 1032 ; HRMS (EI) m/z : [M+H]<sup>+</sup> calcd. for C<sub>23</sub>H<sub>22</sub>N<sub>2</sub>O<sub>5</sub>S<sub>2</sub>: 470.0970, found: 470.0979.

#### 4-Methoxybenzyl (*E*)-2-(4-chlorophenyl)-*N*-tosylethanimidothioate (**1h**)

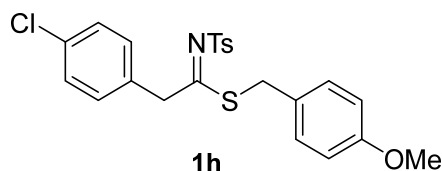

Following the General Procedure I, using 1-chloro-4-ethynylbenzene (50.0 mg, 0.366 mmol), tosyl azide (87.0 mg, 0.439 mmol) and 4-methoxybenzylthiol (169.0 mg, 1.098 mmol). The crude was purified by column chromatography (hexane/EtOAc, 5/1) to afford **1h** (102.5 mg, 61% yield) as a white solid. m.p. 111-113 °C ; <sup>1</sup>H NMR (400 MHz, CDCl<sub>3</sub>) δ 7.85 (d, *J* = 8.3 Hz, 2H), 7.34 (d, *J* = 8.0 Hz, 2H), 7.30-7.24 (m, 4H), 7.00 (d, *J* = 8.8 Hz, 2H), 6.72 (d, *J* = 8.7 Hz, 2H), 4.40 (s, 2H), 3.95 (s, 2H), 3.76 (s, 3H), 2.46 (s, 3H) ; <sup>13</sup>C NMR (100 MHz, CDCl<sub>3</sub>) δ 187.7 (C), 159.1 (C), 143.7 (C), 138.4 (C), 133.8 (C), 132.4 (C), 131.6 (CH×2), 130.3 (CH×2), 129.5 (CH×2), 128.8 (CH×2), 127.1 (CH×2), 126.9 (C), 114.0 (CH×2), 55.3 (CH<sub>3</sub>), 43.5 (CH<sub>2</sub>), 36.0 (CH<sub>2</sub>), 21.7

(CH<sub>3</sub>); IR (ATR)  $\nu$  2914, 2838, 1607, 1537, 1508, 1312, 1238, 1151, 1088, 1033, 1017;

HRMS (EI)  $m/z$  : [M+H]<sup>+</sup> calcd. for C<sub>23</sub>H<sub>22</sub>ClNO<sub>3</sub>S<sub>2</sub>: 459.0730, found: 459.0735

#### 4-Methoxybenzyl (*E*)-2-(4-acetylphenyl)-*N*-tosylethanimidothioate (**1i**)

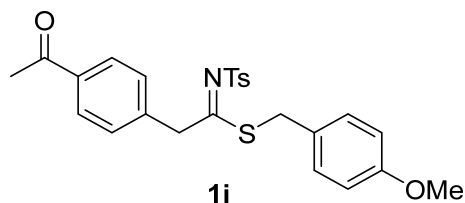

Following the General Procedure I, using 1-(4-ethynylphenyl)ethan-1-one (50.0 mg, 0.347 mmol), tosyl azide (82.0 mg, 0.416 mmol) and 4-methoxybenzylthiol (160.0 mg, 1.040 mmol). The crude was purified by column chromatography (hexane/EtOAc, 5/1) to afford **1i** (105.3 mg, 65% yield) as a yellow solid. m.p. 112-114 °C ; <sup>1</sup>H NMR (400 MHz, CDCl<sub>3</sub>)  $\delta$  7.92 (d,  $J$  = 8.2 Hz, 2H), 7.86 (d,  $J$  = 8.3 Hz, 2H), 7.44 (d,  $J$  = 8.2 Hz, 2H), 7.35 (d,  $J$  = 8.1 Hz, 2H), 7.00 (d,  $J$  = 8.6 Hz, 2H), 6.71 (d,  $J$  = 8.7 Hz, 2H), 4.49 (s, 2H), 3.96 (s, 2H), 3.76 (s, 3H), 2.59 (s, 3H), 2.46 (s, 3H) ; <sup>13</sup>C NMR (100 MHz, CDCl<sub>3</sub>)  $\delta$  197.8 (C), 186.9 (C), 159.1 (C), 143.9 (C), 139.3 (C), 138.4 (C), 136.5 (C), 130.5 (CH $\times$ 2), 130.4 (CH $\times$ 2), 129.6 (CH $\times$ 2), 128.8 (CH $\times$ 2), 127.2 (CH $\times$ 2), 126.8 (C), 114.1 (CH $\times$ 2), 55.3 (CH<sub>3</sub>), 44.1 (CH<sub>2</sub>), 36.1 (CH<sub>2</sub>), 26.8 (CH<sub>3</sub>), 21.7 (CH<sub>3</sub>) ; IR (ATR)  $\nu$  3034, 2995, 2926, 1683, 1607, 1561, 1512, 1413, 1312, 1252, 1086, 1041, 1021 ; HRMS (EI)  $m/z$  : [M+H]<sup>+</sup> calcd. for C<sub>25</sub>H<sub>25</sub>NO<sub>4</sub>S<sub>2</sub>: 467.1225, found: 467.1226

#### 4-Methoxybenzyl (*E*)-2-(2-bromophenyl)-*N*-tosylethanimidothioate (**1j**)

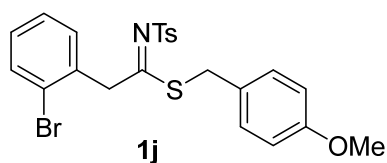

Following the General Procedure I, using 1-bromo-2-ethynylbenzene (50.0 mg, 0.276 mmol), tosyl azide (65.0 mg, 0.331 mmol) and 4-methoxybenzylthiol (128.0 mg, 0.829

mmol). The crude was purified by column chromatography (hexane/EtOAc, 5/1) to afford **1j** (80.5 mg, 58% yield) as a white solid. m.p. 89-91 °C ; <sup>1</sup>H NMR (400 MHz, CDCl<sub>3</sub>) δ 7.93 (d, *J* = 8.2 Hz, 2H), 7.57 (d, *J* = 8.0 Hz, 1H), 7.38 (d, *J* = 8.1 Hz, 2H), 7.33-7.28 (m, 2H), 7.21 (td, *J* = 7.8, 1.8 Hz, 1H), 7.05 (d, *J* = 8.6 Hz, 2H), 6.74 (d, *J* = 8.6 Hz, 2H), 4.60 (s, 2H), 4.00 (s, 2H), 3.77 (s, 3H), 2.48 (s, 3H) ; <sup>13</sup>C NMR (100 MHz, CDCl<sub>3</sub>) δ 188.0 (C), 159.0 (C), 143.7 (C), 138.4 (C), 133.8 (C), 133.0 (CH), 132.5 (CH), 130.3 (CH×2), 129.7 (CH), 129.5 (CH×2), 127.6 (CH), 127.2 (CH×2), 126.9 (C), 126.0 (C), 113.9 (CH×2), 55.2 (CH<sub>3</sub>), 44.9 (CH<sub>2</sub>), 35.9 (CH<sub>2</sub>), 21.7 (CH<sub>3</sub>) ; IR (ATR) ν 2934, 2836, 1543, 1511, 1319, 1303, 1248, 1152, 1087, 1028 ; HRMS (EI) *m/z* : [M+H]<sup>+</sup> calcd. for C<sub>23</sub>H<sub>22</sub>BrNO<sub>3</sub>S<sub>2</sub>: 503.0224, found: 503.0221

#### 4-Methoxybenzyl (*E*)-2-(4-bromophenyl)-*N*-tosylethanimidothioate (**1k**)

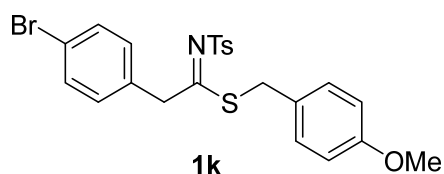

Following the General Procedure I, using 1-bromo-4-ethynylbenzene (50.0 mg, 0.276 mmol), tosyl azide (65.0 mg, 0.331 mmol) and 4-methoxybenzylthiol (128.0 mg, 0.829 mmol). The crude was purified by column chromatography (hexane/EtOAc, 5/1) to afford **1k** (76.3 mg, 55% yield) as a white solid. m.p. 93-94 °C ; <sup>1</sup>H NMR (400 MHz, CDCl<sub>3</sub>) δ ; 7.86 (d, *J* = 8.3 Hz, 2H), 7.44 (d, *J* = 8.4 Hz, 2H), 7.35 (d, *J* = 8.1 Hz, 2H), 7.21 (d, *J* = 8.3 Hz, 2H), 7.00 (d, *J* = 8.6 Hz, 2H), 6.72 (d, *J* = 8.7 Hz, 2H), 4.39 (s, 2H), 3.96 (s, 2H), 3.75 (s, 3H), 2.45 (s, 3H) ; <sup>13</sup>C NMR (100 MHz, CDCl<sub>3</sub>) δ 187.6 (C), 159.1 (C), 143.8 (C), 138.5 (C), 133.0 (C), 132.0 (CH×2), 131.9 (CH×2), 130.4 (CH×2), 129.6 (CH×2), 127.2 (CH×2), 126.9 (C), 122.0 (C), 114.1 (CH×2), 55.4 (CH<sub>3</sub>), 43.6 (CH<sub>2</sub>), 36.1 (CH<sub>2</sub>), 21.8 (CH<sub>3</sub>) ; IR (ATR) ν 2927, 2837, 1566, 1509, 1315, 1242, 1154, 1087, 1035, 1012 ; HRMS (EI) *m/z* : [M+H]<sup>+</sup> calcd. for C<sub>23</sub>H<sub>22</sub>BrNO<sub>3</sub>S<sub>2</sub>: 503.0224, found: 503.0230

#### 4-Methoxybenzyl (*E*)-2-(pyridin-3-yl)-*N*-tosylethanimidothioate (**11**)

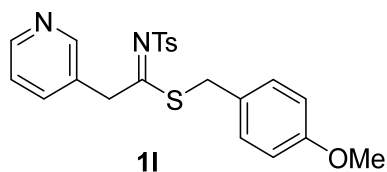

Following the General Procedure I, using 3-ethynylpyridine (50.0 mg, 0.485 mmol), tosyl azide (115.0 mg, 0.582 mmol) and 4-methoxybenzylthiol (224.0 mg, 1.455 mmol). The crude was purified by column chromatography (hexane/EtOAc, 1/1) to afford **11** (140.5 mg, 68% yield) as a yellow oil.  $^1\text{H}$  NMR (400 MHz,  $\text{CDCl}_3$ )  $\delta$  8.57 (d,  $J = 1.8$  Hz, 1H), 8.55-8.53 (m, 1H), 7.84 (d,  $J = 8.3$  Hz, 2H), 7.69 (d,  $J = 7.9$  Hz, 1H), 7.34 (d,  $J = 8.0$  Hz, 2H), 7.27-7.24 (m, 1H), 7.00 (d,  $J = 8.7$  Hz), 6.71 (d,  $J = 8.7$  Hz, 2H), 4.44 (s, 2H), 3.97 (s, 2H), 3.75 (s, 3H), 2.46 (s, 3H);  $^{13}\text{C}$  NMR (100 MHz,  $\text{CDCl}_3$ )  $\delta$  186.8 (C), 159.2 (C), 151.1 (CH), 149.1 (CH), 143.9 (C), 138.4 (C), 137.7 (CH), 130.4 (CH $\times$ 2), 130.0 (C), 129.7 (CH $\times$ 2), 127.2 (CH $\times$ 2), 126.8 (C), 123.6 (CH), 114.1 (CH $\times$ 2), 55.4 (CH $_3$ ), 41.5 (CH $_2$ ), 36.2 (CH $_2$ ), 21.8 (CH $_3$ ); IR (ATR)  $\nu$  3035, 2925, 2838, 1715, 1551, 1511, 1426, 1302, 1248, 1153, 1087, 1030; HRMS (EI)  $m/z$ :  $[\text{M}+\text{H}]^+$  calcd. for  $\text{C}_{22}\text{H}_{22}\text{N}_2\text{O}_3\text{S}_2$ : 426.1072, found: 426.1078

#### 4-Methyl-*N*-(4-phenyl-1-(1-phenylvinyl)-1H-1,2,3-triazol-5-yl)benzenesulfonamide (**3aa**)

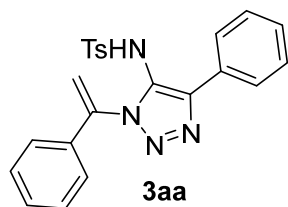

Following the General Procedure II, using 4-methoxybenzyl (*E*)-2-phenyl-*N*-tosylethanimidothioate **1a** (50.0 mg, 0.117 mmol), tripotassium phosphate (51.0 mg, 0.235 mmol) and (1-azidovinyl)benzene **2a** (51.2 mg, 0.352 mmol). The crude was purified by column chromatography (hexane/EtOAc, 3:1) to afford **3aa** (41.4 mg, 85%

yield) as a white solid. m.p. 188-190 °C ; <sup>1</sup>H NMR (400 MHz, d<sub>6</sub>-DMSO) δ 10.68 (br, 1H), 7.58 (d, *J* = 7.2 Hz, 2H), 7.44-7.39 (m, 3H), 7.33 (d, *J* = 8.1 Hz, 2H), 7.27-7.16 (m, 5H), 6.98 (d, *J* = 8.0 Hz, 2H), 6.15 (s, 1H), 5.61 (s, 1H), 2.19 (s, 3H) ; <sup>13</sup>C NMR (100 MHz, d<sub>6</sub>-DMSO) δ 143.4, 141.5, 140.1, 137.2, 134.7, 129.3 (CH×2), 129.3, 129.1, 128.6 (CH×2), 128.2 (CH×2), 128.1, 127.8, 126.4 (CH×2), 126.1 (CH×2), 125.9 (CH×2), 115.5, 20.9 ; IR (ATR) ν 3257, 3032, 2922, 2827, 2773, 1596, 1495, 1447, 1407, 1372, 1341, 1240, 1164, 1092 ; HRMS (EI) *m/z* : [M+H]<sup>+</sup> calcd. for C<sub>23</sub>H<sub>20</sub>N<sub>4</sub>O<sub>2</sub>S: 416.1307, found: 416.1300.

**Gram scale synthetic method of product 3aa:** To a solution of thioimidate **1a** (1.0 g, 2.35 mmol, 1 equiv) and potassium phosphate (998.0 mg, 4.7 mmol, 2 equiv) in DMSO (7.83 mL) was added vinyl azide **2a** (1.02 g, 7.05 mmol, 3 equiv), the resulting reaction mixture was stirred at 80 °C under nitrogen atmosphere for several hours until the reaction was completed as indicated by TLC. The mixture was extracted with DCM for three times and the combined organic phase was washed with 2N HCl solution and brine, dried over MgSO<sub>4</sub>, filtered and concentrated. The crude product was purified by flash column chromatography to afford the desired products **3aa** (684.5 mg, 70%) as a white solid.

***N*-(4-(4-Methoxyphenyl)-1-(1-phenylvinyl)-1H-1,2,3-triazol-5-yl)-4-methylbenzenesulfonamide (3ba)**

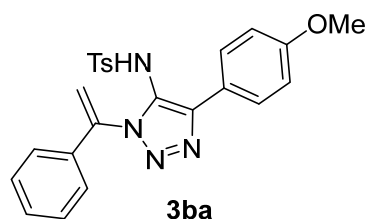

Following the General Procedure II, using 4-methoxybenzyl (*E*)-2-(4-methoxyphenyl)-*N*-tosylethanimidothioate **1b** (50.0 mg, 0.110 mmol), tripotassium phosphate (46.7 mg,



0.22 mmol) and (1-azidovinyl)benzene **2a** (47.8 mg, 0.329 mmol). The crude was purified by column chromatography (hexane/EtOAc, 3:1) to afford **3ba** (34.4 mg, 70% yield) as a white solid. m.p. 199-200 °C ; <sup>1</sup>H NMR (400 MHz, d<sub>6</sub>-DMSO) δ 10.59 (br, 1H), 7.49 (d, *J* = 8.8 Hz, 2H), 7.43-7.38 (m, 3H), 7.33 (d, *J* = 8.2 Hz, 2H), 7.20-7.18 (m, 2H), 7.01 (d, *J* = 8.2 Hz, 2H), 6.76 (d, *J* = 8.8 Hz, 2H), 6.13 (s, 1H), 5.59 (s, 1H), 3.77 (s, 3H), 2.20 (s, 3H); <sup>13</sup>C NMR (100 MHz, d<sub>6</sub>-DMSO) δ 159.1, 143.3, 141.5, 140.1, 137.4, 134.8, 129.3 (CH×3), 128.6 (CH×2), 127.6 (CH×2), 127.3, 126.4 (CH×2), 125.9 (CH×2), 121.6, 115.3, 113.7 (CH×2), 55.1, 20.8 ; IR (ATR) ν 3000, 2837, 2762, 1620, 1514, 1446, 1375, 1341, 1305, 1251, 1162, 1090 ; HRMS (EI) *m/z* : [M+H]<sup>+</sup> calcd. for : C<sub>24</sub>H<sub>22</sub>N<sub>4</sub>O<sub>3</sub>S: 446.1413, found: 446.1411.

**4-Methyl-*N*-(1-(1-phenylvinyl)-4-(*p*-tolyl)-1H-1,2,3-triazol-5-yl)benzenesulfonamide (**3ca**)**

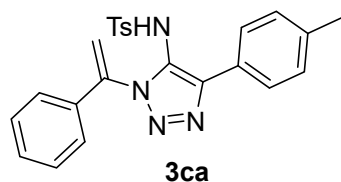

Following the General Procedure II, using 4-methoxybenzyl (*E*)-2-(*p*-tolyl)-*N*-tosylethanimidodithioate **1c** (50.0 mg, 0.114 mmol), tripotassium phosphate (48.4 mg, 0.228 mmol) and (1-azidovinyl)benzene **2a** (49.8 mg, 0.343 mmol). The crude was purified by column chromatography (hexane/EtOAc, 3:1) to afford **3ca** (39.3 mg, 80% yield) as a yellow solid. m.p. 173-174 °C ; <sup>1</sup>H NMR (400 MHz, d<sub>6</sub>-DMSO) δ 10.59 (br, 1H), 7.41 (d, *J* = 7.0 Hz, 2H), 7.39-7.34 (m, 3H), 7.28 (d, *J* = 7.0 Hz, 2H), 7.17-7.174(m, 2H), 6.96 (t, *J* = 8.8 Hz, 4H), 6.10 (s, 1H), 5.55 (s, 1H), 2.25 (s, 3H), 2.17 (s, 3H) ; <sup>13</sup>C NMR (100 MHz, d<sub>6</sub>-DMSO) δ 143.4, 141.6, 140.1, 137.4, 137.3, 134.8, 129.3 (CH×3), 128.8 (CH×2), 128.6 (CH×2), 127.8, 126.4 (CH×2), 126.3, 126.1 (CH×2), 125.9 (CH×2), 115.4, 20.9, 20.9 ; IR (ATR) ν 3261, 3035, 2922, 2831, 2777, 1595, 1514, 1376,

1341, 1238, 1159, 1089 ; HRMS (EI) m/z : [M+H]<sup>+</sup> calcd. for: C<sub>24</sub>H<sub>22</sub>N<sub>4</sub>O<sub>2</sub>S: 430.1463, found: 430.1461.

***N*-4-(3-Methoxyphenyl)-1-(1-phenylvinyl)-1H-1,2,3-triazol-5-yl)-4-methylbenzenesulfonamide (3da)**

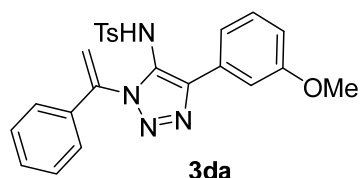

Following the General Procedure II, using 4-methoxybenzyl (*E*)-2-(3-methoxyphenyl)-*N*-tosylethanimidothioate **1d** (50.0 mg, 0.110 mmol), tripotassium phosphate (46.7 mg, 0.22 mmol) and (1-azidovinyl)benzene **2a** (47.8 mg, 0.329 mmol). The crude was purified by column chromatography (hexane/EtOAc, 3:1) to afford **3da** (37.3 mg, 76% yield) as a yellow solid. m.p. 67-69 °C ; <sup>1</sup>H NMR (400 MHz, CDCl<sub>3</sub>) δ 7.40-7.32 (m, 5H), 7.19-7.11 (m, 4H), 7.08 (t, *J* = 8.1 Hz, 1H), 6.96 (d, *J* = 8.0 Hz, 2H), 6.78 (dd, *J* = 8.1, 1.5 Hz, 1H), 6.59 (br, 1H), 5.72 (s, 1H), 5.59 (s, 1H), 3.75 (s, 3H), 2.29 (s, 3H) ; <sup>13</sup>C NMR (100 MHz, d<sub>6</sub>-DMSO) δ 159.0, 143.3, 141.5, 140.1, 137.1, 134.8, 130.4, 129.3 (CH×4), 128.6 (CH×2), 128.2, 126.4 (CH×2), 125.9 (CH×2), 118.7, 115.6, 113.9, 111.2, 55.1, 20.9 ; IR (ATR) ν 3244, 3063, 3000, 2959, 2927, 2836, 1585, 1495, 1447, 1370, 1335, 1292, 1243, 1162, 1091, 1050 ; HRMS (EI) m/z : [M+H]<sup>+</sup> calcd. for C<sub>24</sub>H<sub>22</sub>N<sub>4</sub>O<sub>3</sub>S: 446.1413, found: 446.1411.

**4-Methyl-*N*-(4-(naphthalen-2-yl)-1-(1-phenylvinyl)-1H-1,2,3-triazol-5-yl)benzenesulfonamide (3ea)**

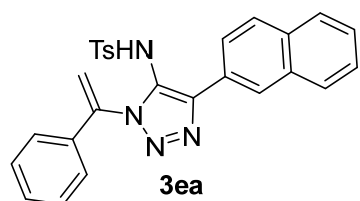

Following the General Procedure II, using 4-methoxybenzyl (*E*)-2-(naphthalen-2-yl)-*N*-tosylethanimidothioate **1e** (50.0 mg, 0.105 mmol), tripotassium phosphate (44.6 mg, 0.21 mmol) and (1-azidovinyl)benzene **2a** (45.8 mg, 0.315 mmol). The crude was purified by column chromatography (hexane/EtOAc, 3:1) to afford **3ea** (37.2 mg, 76% yield) as a white solid. m.p. 204-205 °C ; <sup>1</sup>H NMR (400 MHz, d<sub>6</sub>-DMSO) δ 7.98 (s, 1H), 7.86-7.81 (m, 1H), 7.73-7.64 (m, 3H), 7.48-7.46 (m, 2H), 7.40-7.38 (m, 3H), 7.27 (d, *J* = 8.2 Hz, 2H), 7.23-7.21 (m, 2H), 6.66 (d, *J* = 8.2 Hz, 2H), 6.17 (s, 1H), 5.64 (s, 1H), 1.72 (s, 3H) ; <sup>13</sup>C NMR (100 MHz, d<sub>6</sub>-DMSO) δ 143.2, 141.3, 140.2, 137.4, 134.9, 132.6, 132.4, 129.3, 129.1 (CH×2), 128.7, 128.6 (CH×2), 128.1, 127.7, 127.5, 126.6, 126.3 (CH×3), 126.2, 126.0 (CH×2), 125.2, 124.0, 115.5, 20.5 ; IR (ATR) ν 3000, 2926, 2824, 2755, 1580, 1421, 1345, 1248, 1163, 1092, 1019 ; HRMS (EI) *m/z* : [M+H]<sup>+</sup> calcd. for C<sub>27</sub>H<sub>22</sub>N<sub>4</sub>O<sub>2</sub>S: 466.1463, found: 466.1471.

***N*-(4-(tert-Butyl)-1-(1-phenylvinyl)-1H-1,2,3-triazol-5-yl)-4-methylbenzenesulfonamide (3fa)**

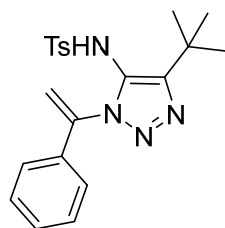

**3fa**

Following the General Procedure II, using 4-methylbenzyl (*E*)-3,3-dimethyl-*N*-tosylbutanimidothioate **1f** (50.0 mg, 0.128 mmol), tripotassium phosphate (54.3 mg, 0.256 mmol) and (1-azidovinyl)benzene **2a** (55.9 mg, 0.385 mmol). The crude was purified by column chromatography (hexane/EtOAc, 3:1) to afford **3fa** (34.0 mg, 67% yield) as a white solid. m.p. 77-79 °C ; <sup>1</sup>H NMR (400 MHz, d<sub>6</sub>-DMSO) δ 10.13 (s, 1H), 7.42 (d, *J* = 8.1 Hz, 2H), 7.32-7.25 (m, 3H), 7.11 (d, *J* = 8.0 Hz, 2H), 6.90 (d, *J* = 7.3

Hz, 2H), 5.74 (s, 1H), 5.29 (s, 1H), 2.24 (s, 3H), 1.26 (s, 9H) ;  $^{13}\text{C}$  NMR (100 MHz,  $\text{d}_6$ -DMSO)  $\delta$  150.5, 143.2, 140.0, 138.1, 134.5, 129.3 (CH $\times$ 2), 129.1, 128.2 (CH $\times$ 2), 126.8, 126.6 (CH $\times$ 2), 125.7 (CH $\times$ 2), 114.6, 31.4, 39.8, 21.0 ; IR (ATR)  $\nu$  3247, 3065, 2960, 2871, 1567, 1447, 1394, 1337, 1271, 1157, 1091, 1021 ; HRMS (EI)  $m/z$  :  $[\text{M}+\text{H}]^+$  calcd. for  $\text{C}_{21}\text{H}_{24}\text{N}_4\text{O}_2\text{S}$ : 396.1620, found: 396.1617.

**4-Methyl-*N*-(4-(4-nitrophenyl)-1-(1-phenylvinyl)-1H-1,2,3-triazol-5-yl)benzenesulfonamide (3ga)**

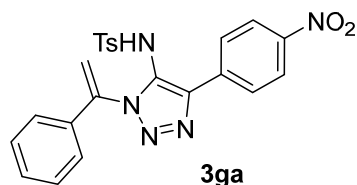

Following the General Procedure II, using 4-methoxybenzyl (*E*)-2-(4-nitrophenyl)-*N*-tosylethanimidothioate **1g** (50.0 mg, 0.106 mmol), tripotassium phosphate (45.0 mg, 0.212 mmol) and (1-azidovinyl)benzene **2a** (46.3 mg, 0.319 mmol). The crude was purified by column chromatography (hexane/EtOAc, 3:1) to afford **3ga** (27.4 mg, 56% yield) as a white solid. m.p. 205-206 °C ;  $^1\text{H}$  NMR (400 MHz,  $\text{d}_6$ -DMSO)  $\delta$  10.91 (br, 1H), 8.04 (d,  $J$  = 8.7 Hz, 2H), 7.77 (d,  $J$  = 8.8 Hz, 2H), 7.43-7.42 (m, 3H), 7.33 (d,  $J$  = 8.1 Hz, 2H), 7.24-7.22 (m, 2H), 6.98 (d,  $J$  = 8.1 Hz, 2H), 6.24 (s, 1H), 5.67 (s, 1H), 2.10 (s, 3H) ;  $^{13}\text{C}$  NMR (100 MHz,  $\text{d}_6$ -DMSO)  $\delta$  146.4, 143.7, 139.9, 139.5, 137.1, 135.7, 134.6, 129.8, 129.4 (CH $\times$ 2), 128.7 (CH $\times$ 2), 127.1 (CH $\times$ 2), 126.6 (CH $\times$ 2), 126.0 (CH $\times$ 2), 123.5 (CH $\times$ 2), 116.0, 20.6 ; IR (ATR)  $\nu$  3000, 2937, 2829, 2755, 1601, 1574, 1516, 1420, 1344, 1263, 1239, 1166, 1094 ; HRMS (EI)  $m/z$  :  $[\text{M}+\text{H}]^+$  calcd. for  $\text{C}_{23}\text{H}_{19}\text{N}_5\text{O}_4\text{S}$ : 461.1158, found: 461.1161.

***N*-(4-(4-Chlorophenyl)-1-(1-phenylvinyl)-1H-1,2,3-triazol-5-yl)-4-methylbenzenesulfonamide (3ha)**

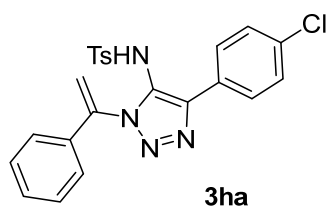

Following the General Procedure II, using 4-methoxybenzyl (*E*)-2-(4-chlorophenyl)-*N*-tosylethanimidothioate **1h** (50.0 mg, 0.109 mmol), tripotassium phosphate (46.3 mg, 0.218 mmol) and (1-azidovinyl)benzene **2a** (47.5 mg, 0.326 mmol). The crude was purified by column chromatography (hexane/EtOAc, 3:1) to afford **3ha** (31.9 mg, 65% yield) as a yellow solid. m.p. 189-191 °C ; <sup>1</sup>H NMR (400 MHz, d<sub>6</sub>-DMSO) δ 10.73 (br, 1H), 7.52 (d, *J* = 8.4 Hz, 2H), 7.43 -7.41 (m, 3H), 7.32 (d, *J* = 8.0 Hz, 2H), 7.26 – 7.21 (m, 4H), 7.01 (d, *J* = 7.9 Hz, 2H), 6.20 (s, 1H), 5.63 (s, 1H), 2.24 (s, 3H) ; <sup>13</sup>C NMR (100 MHz, d<sub>6</sub>-DMSO) δ 143.7, 140.5, 140.0, 137.3, 134.7, 132.7, 129.3 (CH×3), 128.6 (CH×2), 128.5, 128.3 (CH×2), 128.0, 127.8 (CH×2), 126.5 (CH×2), 125.9 (CH×2), 115.7, 21.0 ; IR (ATR) ν 3109, 3067, 2925, 2829, 1633, 1597, 1494, 1367, 1336, 1163, 1087 ; HRMS (EI) *m/z* : [M+H]<sup>+</sup> calcd. for C<sub>23</sub>H<sub>19</sub>ClN<sub>4</sub>O<sub>2</sub>S: 450.0917, found: 450.0912.

***N*-(4-(4-Acetylphenyl)-1-(1-phenylvinyl)-1H-1,2,3-triazol-5-yl)-4-methylbenzenesulfonamide (3ia)**

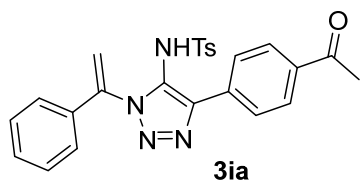

Following the General Procedure II, using 4-methoxybenzyl (*E*)-2-(4-acetylphenyl)-*N*-tosylethanimidothioate **1i** (50.0 mg, 0.107 mmol), tripotassium phosphate (45.4 mg, 0.214 mmol) and (1-azidovinyl)benzene **2a** (46.6 mg, 0.321 mmol). The crude was purified by column chromatography (hexane/EtOAc, 3:1) to afford **3ia** (33.4 mg, 68%

yield) as a white solid. m.p. 193-194 °C ; <sup>1</sup>H NMR (400 MHz, d<sub>6</sub>-DMSO) δ 10.82 (br, 1H), 7.78 (d, *J* = 8.4 Hz, 2H), 7.68 (d, *J* = 8.3 Hz, 2H), 7.43-7.41 (m, 3H), 7.32 (d, *J* = 8.2 Hz, 2H), 7.23-7.21 (m, 2H), 6.97 (d, *J* = 8.1 Hz, 2H), 6.20 (s, 1H), 5.64 (s, 1H), 2.59 (s, 3H), 2.10 (s, 3H); <sup>13</sup>C NMR (100 MHz, d<sub>6</sub>-DMSO) δ 197.4, 143.5, 140.5, 140.0, 137.1, 135.7, 134.7, 133.6, 129.4 (CH×3), 129.1, 128.6 (CH×2), 128.1 (CH×2), 126.5 (CH×2), 126.1 (CH×2), 125.9 (CH×2), 115.8, 26.7, 20.7 ; IR (ATR) ν 3133, 3061, 2964, 2928, 2858, 1674, 1614, 1404, 1361, 1265, 1166, 1094 ; HRMS (EI) *m/z* : [M+H]<sup>+</sup> calcd. for C<sub>25</sub>H<sub>22</sub>N<sub>4</sub>O<sub>3</sub>S: 458.1413, found: 458.1418.

***N*-(4-(2-Bromophenyl)-1-(1-phenylvinyl)-1H-1,2,3-triazol-5-yl)-4-methylbenzenesulfonamide (3ja)**

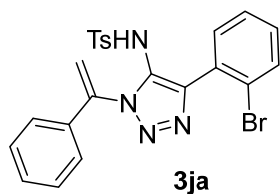

Following the General Procedure II, using 4-methoxybenzyl (*E*)-2-(2-bromophenyl)-*N*-tosylethanimidothioate **1j** (50.0 mg, 0.099 mmol), tripotassium phosphate (42.0 mg, 0.198 mmol) and (1-azidovinyl)benzene **2a** (43.1 mg, 0.297 mmol). The crude was purified by column chromatography (hexane/EtOAc, 3:1) to afford **3ja** (36.8 mg, 75% yield) as a yellow solid. m.p. 81-83 °C ; <sup>1</sup>H NMR (400 MHz, d<sub>6</sub>-DMSO) δ 10.65 (br, 1H), 7.51-7.47 (m, 1H), 7.44-7.41 (m, 3H), 7.29 (d, *J* = 8.2 Hz, 2H), 7.25-7.19 (m, 5H), 6.97 (d, *J* = 8.0 Hz, 2H), 6.25 (s, 1H), 5.63 (s, 1H), 2.23 (s, 3H) ; <sup>13</sup>C NMR (100 MHz, d<sub>6</sub>-DMSO) δ 142.9, 141.5, 139.5, 137.0, 134.8, 132.7, 131.8, 130.1 (CH, C), 129.7, 129.3, 129.2 (CH×2), 128.6 (CH×2), 127.3, 126.0 (CH×2), 125.8 (CH×2), 122.9, 115.7, 21.0 ; IR (ATR) ν 3202, 3078, 2921, 2854, 1667, 1599, 1478, 1446, 1365, 1338, 1158, 1091, 1046, 1028 ; HRMS (EI) *m/z* : [M+H]<sup>+</sup> calcd. for C<sub>23</sub>H<sub>19</sub>BrN<sub>4</sub>O<sub>2</sub>S: 494.0412, found: 494.0406.

***N*-(4-(4-Bromophenyl)-1-(1-phenylvinyl)-1H-1,2,3-triazol-5-yl)-4-methylbenzenesulfonamide (3ka)**

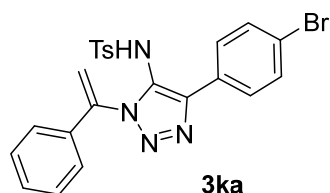

Following the General Procedure II, using 4-methoxybenzyl (*E*)-2-(4-bromophenyl)-*N*-tosylethanimidothioate **1k** (50.0 mg, 0.099 mmol), tripotassium phosphate (42.0 mg, 0.198 mmol) and (1-azidovinyl)benzene **2a** (43.1 mg, 0.297 mmol). The crude was purified by column chromatography (hexane/EtOAc, 3:1) to afford **3ka** (34.3 mg, 70% yield) as a yellow solid. m.p. 200-201 °C ; <sup>1</sup>H NMR (400 MHz, d<sub>6</sub>-DMSO) δ 10.73 (br, 1H), 7.47-7.41 (m, 5H), 7.38 (d, *J* = 8.4 Hz, 2H), 7.32 (d, *J* = 8.1 Hz, 2H), 7.22 (m, 2H), 7.01 (d, *J* = 8.0 Hz, 2H), 6.20 (s, 1H), 5.63 (s, 1H), 2.25 (s, 3H) ; <sup>13</sup>C NMR (100 MHz, d<sub>6</sub>-DMSO) δ 143.7, 140.5, 140.0, 137.2, 134.7, 131.2 (CH×2), 129.3 (CH×3), 128.6 (CH×2), 128.5, 128.4, 128.1 (CH×2), 126.5 (CH×2), 126.0 (CH×2), 121.3, 115.7, 21.1 ; IR (ATR) ν 3108, 3057, 2923, 2851, 1598, 1489, 1398, 1367, 1335, 1258 ; HRMS (EI) *m/z* : [M+H]<sup>+</sup> calcd. for C<sub>23</sub>H<sub>19</sub>BrN<sub>4</sub>O<sub>2</sub>S: 494.0412, found: 494.0403.

**4-Methyl-*N*-(1-(1-phenylvinyl)-4-(pyridin-3-yl)-1H-1,2,3-triazol-5-yl)benzenesulfonamide (3la)**

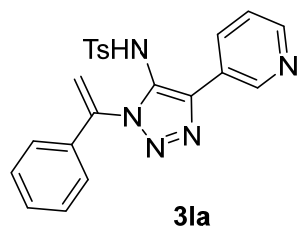

Following the General Procedure II, using 4-methoxybenzyl (*E*)-2-(pyridin-3-yl)-*N*-tosylethanimidothioate **1i** (50.0 mg, 0.117 mmol), tripotassium phosphate (49.7 mg, 0.234 mmol) and (1-azidovinyl)benzene **2a** (51.1 mg, 0.352 mmol). The crude was

purified by column chromatography (hexane/EtOAc, 3:1) to afford **3ia** (29.3 mg, 60% yield) as a yellow solid. m.p. 183-185 °C ; <sup>1</sup>H NMR (400 MHz, d<sub>6</sub>-DMSO) δ 8.77 (s, 1H), 8.44 (s, 1H), 7.86 (d, *J* = 7.2 Hz, 1H), 7.42 (s, 3H), 7.33 (d, *J* = 7.6 Hz, 2H), 7.22 (s, 3H), 6.97 (d, *J* = 7.6 Hz, 2H), 6.18 (s, 1H), 5.63 (s, 1H), 2.18 (s, 3H) ; <sup>13</sup>C NMR (100 MHz, d<sub>6</sub>-DMSO) δ 148.5, 146.9, 143.5, 140.0, 139.0, 136.9, 134.7, 133.3, 129.4 (CH×2), 129.3, 129.2, 128.6 (CH×2), 126.5 (CH×2), 125.9 (CH×2), 125.3, 123.2, 115.7, 20.9 ; IR (ATR) ν 3061, 2925, 2853, 1709, 1599, 1447, 1342, 1259, 1164, 1091 ; HRMS (ESI) *m/z* : [M+H]<sup>+</sup> calcd. for C<sub>22</sub>H<sub>19</sub>N<sub>5</sub>O<sub>2</sub>S: 417.1259, found: 417.1253.

***N*-(1-(1-(4-Chlorophenyl)vinyl)-4-phenyl-1H-1,2,3-triazol-5-yl)-4-methylbenzenesulfonamide (3ab)**

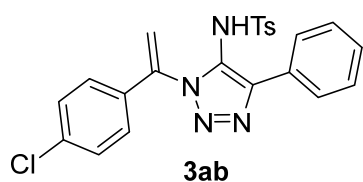

Following the General Procedure II, using 4-methoxybenzyl (*E*)-2-phenyl-*N*-tosylethanimidothioate **1a** (50.0 mg, 0.117 mmol), tripotassium phosphate (49.7 mg, 0.234 mmol) and 1-(1-azidovinyl)-4-chlorobenzene **2b** (63.2 mg, 0.352 mmol). The crude was purified by column chromatography (hexane/EtOAc, 3:1) to afford **3ab** (38.0 mg, 72% yield) as a white solid. m.p. 189-190 °C ; <sup>1</sup>H NMR (400 MHz, d<sub>6</sub>-DMSO) δ 10.69 (br, 1H), 7.58 (d, *J* = 8.3 Hz, 2H), 7.47 (d, *J* = 8.7 Hz, 2H), 7.32 (d, *J* = 8.3 Hz, 2H), 7.26-7.17 (m, 5H), 6.97 (d, *J* = 8.0 Hz, 2H), 6.17 (d, *J* = 1.7 Hz, 1H), 5.63 (d, *J* = 1.7 Hz, 1H), 2.19 (s, 3H) ; <sup>13</sup>C NMR (100 MHz, d<sub>6</sub>-DMSO) δ 143.5, 141.6, 139.0, 137.0, 134.0, 133.5, 129.4 (CH×2), 129.0, 128.6 (CH×2), 128.3 (CH×2), 128.0, 127.9, 127.8 (CH×2), 126.5 (CH×2), 126.1 (CH×2), 116.1, 20.9 ; IR (ATR) ν 3229, 3070, 2918, 1598, 1492, 1398, 1369, 1170, 1088, 1014 ; HRMS (EI) *m/z* : [M+H]<sup>+</sup> calcd. for C<sub>23</sub>H<sub>19</sub>ClN<sub>4</sub>O<sub>2</sub>S: 450.0917, found: 450.0927.



**4-Methyl-N-(4-phenyl-1-(1-(*p*-tolyl)vinyl)-1H-1,2,3-triazol-5-yl)benzenesulfonamide (3ac)**

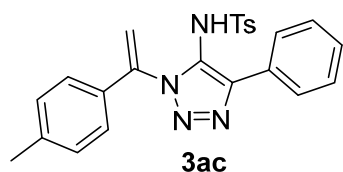

Following the General Procedure II, using **1a** (50.0 mg, 0.117 mmol), tripotassium phosphate (49.7 mg, 0.234 mmol) and 1-(1-azidovinyl)-4-methylbenzene **2c** (56.0 mg, 0.352 mmol). The crude was purified by column chromatography (hexane/EtOAc, 3:1) to afford **3ac** (40.3 mg, 80% yield) as a white solid. m.p. 139-141 °C ; <sup>1</sup>H NMR (400 MHz, d<sub>6</sub>-DMSO) δ 10.64 (br, 1H), 7.57 (d, *J* = 7.3 Hz, 2H), 7.31 (d, *J* = 8.1 Hz, 2H), 7.26 – 7.18 (m, 5H), 7.05 (d, *J* = 8.0 Hz, 2H), 6.97 (d, *J* = 8.1 Hz, 2H), 6.08 (s, 1H), 5.52 (s, 1H), 2.34 (s, 3H), 2.19 (s, 3H) ; <sup>13</sup>C NMR (100 MHz, d<sub>6</sub>-DMSO) δ 143.3, 141.4, 140.0, 138.9, 137.2, 132.0, 129.3, (CH×2) 129.2, 129.1 (CH×2), 128.2 (CH×2), 128.1, 127.7, 126.4 (CH×2), 126.1 (CH×2), 125.8 (CH×2), 114.5, 20.9, 20.8 ; IR (ATR) ν 3269, 3032, 2922, 2824, 2742, 1598, 1495, 1342, 1240, 1165, 1092 ; HRMS (EI) *m/z* : [M+H]<sup>+</sup> calcd. for C<sub>24</sub>H<sub>22</sub>N<sub>4</sub>O<sub>2</sub>S: 430.1463, found: 430.1458.

**4-Methyl-N-(1-(1-(naphthalen-2-yl)vinyl)-4-phenyl-1H-1,2,3-triazol-5-yl)benzenesulfonamide (3ad)**

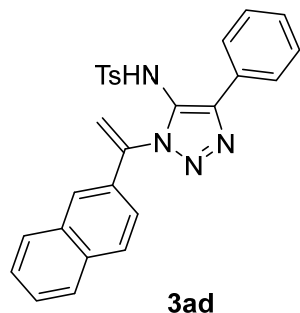

Following the General Procedure II, using **1a** (50.0 mg, 0.117 mmol), tripotassium phosphate (49.7 mg, 0.234 mmol) and 2-(1-azidovinyl)naphthalene **2d** (68.7 mg, 0.352

mmol). The crude was purified by column chromatography (hexane/EtOAc, 3:1) to afford **3ad** (49.1 mg, 90% yield) as an orange solid. m.p. 188-189 °C ; <sup>1</sup>H NMR (400 MHz, d<sub>6</sub>-DMSO) δ 10.68 (br, 1H), 7.94 (d, *J* = 8.4 Hz, 2H), 7.92 - 7.87 (m, 1H), 7.69-7.65 (m, 2H), 7.58 - 7.51 (m, 3H), 7.45 (dd, *J* = 8.7, 1.9 Hz, 1H), 7.34 (d, *J* = 8.3 Hz, 2H), 7.30 -7.22 (m, 3H), 6.92 (d, *J* = 8.0 Hz, 2H), 6.29 (d, *J* = 1.5 Hz, 1H), 5.71 (d, *J* = 1.5 Hz, 1H), 2.10 (s, 3H) ; <sup>13</sup>C NMR (100 MHz, d<sub>6</sub>-DMSO) δ 143.4, 141.6, 140.1 137.1, 133.1, 132.5, 132.0, 129.3, 129.7, 128.6, 128.3, 128.2, 128.1, 127.8, 127.5, 127.0, 126.7, 126.5, 126.2, 125.3, 123.4, 116.2, 20.8 ; IR (ATR) ν 3059, 2922, 1636, 1598, 1495, 1402, 1340, 1250, 1162, 1092 ; HRMS (EI) *m/z* : [M+H]<sup>+</sup> calcd. for C<sub>27</sub>H<sub>22</sub>N<sub>4</sub>O<sub>2</sub>S: 466.1463, found: 466.1467.

***N*-(1-(1-(4-Methoxyphenyl)vinyl)-4-phenyl-1H-1,2,3-triazol-5-yl)-4-methylbenzenesulfonamide (3ae)**

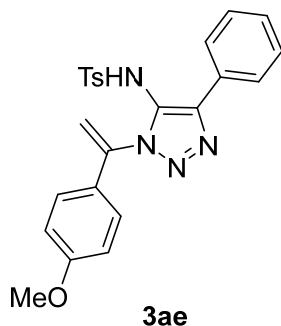

Following the General Procedure II, using **1a** (50.0 mg, 0.117 mmol), tripotassium phosphate (49.7 mg, 0.234 mmol) and 1-(1-azidovinyl)-4-methoxybenzene **2e** (61.7 mg, 0.352 mmol). The crude was purified by column chromatography (hexane/EtOAc, 3:1) to afford **3ae** (26.1 mg, 50% yield) as a yellow solid. m.p. 149-151 °C ; <sup>1</sup>H NMR (400 MHz, CDCl<sub>3</sub>) δ 7.64 (dd, *J* = 7.9, 1.4 Hz, 2H), 7.34 (d, *J* = 8.3 Hz, 2H), 7.27 - 7.15 (m, 3H), 7.04 (d, *J* = 8.7 Hz, 2H), 6.96 (d, *J* = 8.3 Hz, 2H), 6.85 (d, *J* = 8.8 Hz, 2H), 5.55 (d, *J* = 1.0 Hz, 1H), 5.40 (d, *J* = 1.0 Hz, 1H), 3.80 (s, 3H), 2.28 (s, 3H) ; <sup>13</sup>C NMR (100 MHz, CDCl<sub>3</sub>) δ 160.9, 144.6, 143.0, 140.4, 136.0, 129.6 (CH×2), 129.1, 128.4 (CH×2),

128.3, 127.6 (CH×2), 127.5 (CH×2), 127.0, 126.8 (CH×2, C), 114.5 (CH×2), 113.0, 55.5, 21.6 ; IR (ATR)  $\nu$  3067, 3000, 2934, 2833, 1642, 1606, 1512, 1424, 1341, 1250, 1164, 1091, 1030 ; HRMS (EI)  $m/z$  :  $[M+H]^+$  calcd. for C<sub>24</sub>H<sub>22</sub>N<sub>4</sub>O<sub>3</sub>S: 446.1413, found: 446.1421.

***N*-(1-(1-Mesitylvinyl)-4-phenyl-1H-1,2,3-triazol-5-yl)-4-methylbenzenesulfonamide (3af)**

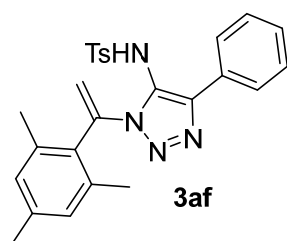

Following the General Procedure II, using **1a** (50.0 mg, 0.117 mmol), tripotassium phosphate (49.7 mg, 0.234 mmol) and 2-(1-azidovinyl)-1,3,5-trimethylbenzene **2f** (65.9 mg, 0.352 mmol). The crude was purified by column chromatography (hexane/EtOAc, 3:1) to afford **3af** (39.7 mg, 74% yield) as a white solid. m.p. 227-228 °C. <sup>1</sup>H NMR (400 MHz, d<sub>6</sub>-DMSO)  $\delta$  10.48 (br, 1H), 7.34 (d,  $J$  = 7.5 Hz, 2H), 7.26 (d,  $J$  = 8.1 Hz, 2H), 7.15 (t,  $J$  = 7.3 Hz, 1H), 7.04 (t,  $J$  = 7.6 Hz, 2H), 6.94 - 6.87 (m, 4H), 6.33 (s, 1H), 5.44 (s, 1H), 2.26 (s, 3H), 2.16 (s, 3H), 2.13 (s, 6H) ; <sup>13</sup>C NMR (100 MHz, d<sub>6</sub>-DMSO)  $\delta$  143.4, 142.2, 139.2, 137.7, 137.2, 136.7, 132.1, 129.3 (CH×2), 129.0, 128.6 (CH×2), 128.0 (CH×2), 127.3, 127.1, 126.5 (CH×2), 126.4 (CH×2), 114.6, 20.9, 20.7, 19.8 (CH<sub>3</sub>×2) ; IR (ATR)  $\nu$  3133, 2998, 2966, 2922, 2857, 2814, 2739, 1648, 1495, 1427, 1266, 1166, 1092, 1054. HRMS (EI)  $m/z$  :  $[M+H]^+$  calcd. for C<sub>26</sub>H<sub>26</sub>N<sub>4</sub>O<sub>2</sub>S: 458.1776, found: 458.1773.

**4-Methyl-N-(1-(oct-1-en-2-yl)-4-phenyl-1H-1,2,3-triazol-5-yl)benzenesulfonamide  
(3ag)**

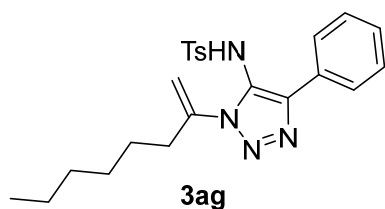

Following the General Procedure II, using **1a** (50.0 mg, 0.117 mmol), tripotassium phosphate (49.7 mg, 0.234 mmol) and 2-azido-oct-1-ene **2g** (53.9 mg, 0.352 mmol). The crude was purified by column chromatography (hexane/EtOAc, 3:1) to afford **3ag** (27.3 mg, 55% yield) as a white solid. m.p. 137-138 °C ; <sup>1</sup>H NMR (400 MHz, CDCl<sub>3</sub>) δ 7.38 - 7.28 (m, 4H), 7.16 (t, *J* = 7.3 Hz, 1H), 7.08 (t, *J* = 7.4 Hz, 2H), 6.88 (d, *J* = 8.0 Hz, 2H), 5.34 (s, 1H), 5.26 (s, 1H), 2.59 (t, *J* = 7.6 Hz, 2H), 2.26 (s, 3H), 1.53 – 1.48 (m, 2H), 1.41-1.23 (m, 6H), 0.89 (t, *J* = 6.8 Hz, 3H) ; <sup>13</sup>C NMR (100 MHz, CDCl<sub>3</sub>) δ 144.5, 143.1, 142.7, 135.8, 129.5 (CH×2), 129.1, 128.4 (CH×2), 128.0, 127.4 (CH×2), 126.9 (CH×2), 126.1, 112.1, 34.5, 31.7, 28.8, 26.6, 22.7, 21.6, 14.2 ; IR (ATR) ν 3060, 2961, 2921, 2854, 1670, 1596, 1493, 1434, 1342, 1291, 1165, 1088 ; HRMS (EI) *m/z*: [M+H]<sup>+</sup> calcd. for C<sub>23</sub>H<sub>28</sub>N<sub>4</sub>O<sub>2</sub>S: 424.1933, found: 424.1938.

**N-(1-(1-Cyclohexylvinyl)-4-phenyl-1H-1,2,3-triazol-5-yl)-4-methylbenzenesulfonamide (3ah)**

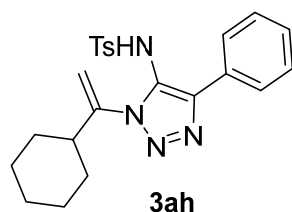

Following the General Procedure II, using **1a** (50.0 mg, 0.117 mmol), tripotassium phosphate (49.7 mg, 0.234 mmol) and (1-azidovinyl)cyclohexane **2h** (53.2 mg, 0.352 mmol). The crude was purified by column chromatography (hexane/EtOAc, 3:1) to

afford **3ah** (19.8 mg, 40% yield) as a white solid. m.p. 199-200 °C ; <sup>1</sup>H NMR (400 MHz, d<sub>6</sub>-DMSO) δ 10.60 (br, 1H), 7.52 (d, *J* = 6.9 Hz, 2H), 7.36 (d, *J* = 8.2 Hz, 2H), 7.24-7.15 (m, 3H), 7.06 (d, *J* = 8.2 Hz, 2H), 5.33 (s, 1H), 5.26 (s, 1H), 2.53 – 2.46 (m, 1H), 2.23 (s, 3H), 1.69 – 1.54 (m, 5H), 1.24 - 0.99 (m, 6H) ; <sup>13</sup>C NMR (100 MHz, d<sub>6</sub>-DMSO) δ 146.5, 143.4, 141.8, 137.5, 129.4 (CH×2), 129.3, 128.2 (CH×2), 127.7, 127.0, 126.5 (CH×2), 126.2 (CH×2), 111.8 (CH<sub>2</sub>), 41.2, 30.4, 25.7, 20.9. IR (ATR) ν 3059, 2924, 2854, 1656, 1496, 1451, 1423, 1346, 1165, 1091. HRMS (EI) *m/z* : [M+H]<sup>+</sup> calcd. for C<sub>23</sub>H<sub>26</sub>N<sub>4</sub>O<sub>2</sub>S: 422.1776, found: 422.1767.

**4-Methyl-*N*-(4-phenyl-1-(1-(thiophen-2-yl)vinyl)-1H-1,2,3-triazol-5-yl)benzenesulfonamide (3ai)**

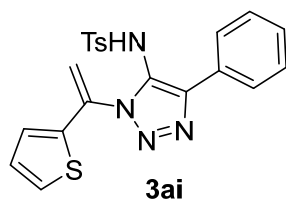

Following the General Procedure II, using **1a** (50.0 mg, 0.117 mmol), tripotassium phosphate (49.7 mg, 0.234 mmol) and 2-(1-azidovinyl)thiophene **2i** (53.2 mg, 0.352 mmol). The crude was purified by column chromatography (hexane/EtOAc, 3:1) to afford **3ai** (26.2 mg, 53% yield) as a brown solid. m.p. 165-167 °C ; <sup>1</sup>H NMR (400 MHz, d<sub>6</sub>-DMSO) δ 10.74 (br, 1H), 7.63 – 7.60 (m, 3H), 7.33 (d, *J* = 8.2 Hz, 2H), 7.28 - 7.20 (m, 3H), 7.06 (dd, *J* = 5.0, 3.8 Hz, 1H), 6.99 (d, *J* = 8.1 Hz, 2H), 6.89 - 6.84 (m, 1H), 5.96 (s, 1H), 5.45 (s, 1H), 2.21 (s, 3H) ; <sup>13</sup>C NMR (100 MHz, d<sub>6</sub>-DMSO) δ 143.4, 141.4, 138.1, 137.1, 134.7, 129.3 (CH×2), 129.1, 128.3 (CH×2), 127.9, 127.8 (CH, C), 127.7, 126.8, 126.4 (CH×2), 126.2 (CH×2), 113.9, 20.9. IR (ATR) ν 3112, 3039, 2922, 2850, 1630, 1498, 1435, 1372, 1337, 1234, 1163, 1090. HRMS (EI) *m/z* : [M+H]<sup>+</sup> calcd. for C<sub>21</sub>H<sub>18</sub>N<sub>4</sub>O<sub>2</sub>S<sub>2</sub>: 422.0817, found: 422.0868.

***N*-(1-(1-(4-Chlorophenyl)vinyl)-4-(*p*-tolyl)-1H-1,2,3-triazol-5-yl)-4-methylbenzenesulfonamide (3cb)**

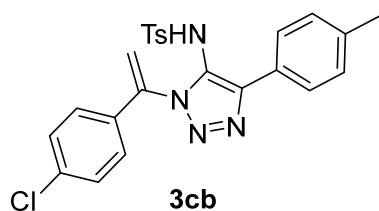

Following the General Procedure II, using 4-methoxybenzyl (*Z*)-2-(*p*-tolyl)-*N*-tosylethanimidothioate **1c** (50.0 mg, 0.114 mmol), tripotassium phosphate (48.4 mg, 0.228 mmol) and 1-(1-azidovinyl)-4-chlorobenzene **2b** (61.2 mg, 0.341 mmol). The crude was purified by column chromatography (hexane/EtOAc, 3:1) to afford **3cb** (43.5 mg, 82% yield) as a white solid. m.p. 202-203 °C. <sup>1</sup>H NMR (400 MHz, d<sub>6</sub>-DMSO) δ 10.64 (br, 1H), 7.48 - 7.44 (m, 4H), 7.32 (d, *J* = 8.1 Hz, 2H), 7.20 (d, *J* = 8.5 Hz, 2H), 7.02 (d, *J* = 8.0 Hz, 2H), 6.99 (d, *J* = 8.1 Hz, 2H), 6.17 (s, 1H), 5.62 (s, 1H), 2.29 (s, 3H), 2.21 (s, 3H); <sup>13</sup>C NMR (100 MHz, d<sub>6</sub>-DMSO) δ 143.4, 141.6, 139.0, 137.4, 137.3, 133.9, 133.6, 129.2 (CH×2), 128.8 (CH×2), 128.6 (CH×2), 127.8 (CH×2, C), 126.4 (CH×2), 126.3, 126.1 (CH×2), 116.0, 20.9, 20.9. IR (ATR) ν 3239, 3129, 2945, 1651, 1585, 1489, 1398, 1367, 1333, 1238, 1164, 1093. HRMS (EI) *m/z*: [M+H]<sup>+</sup> calcd. for C<sub>24</sub>H<sub>21</sub>ClN<sub>4</sub>O<sub>2</sub>S: 464.1074, found: 464.1080.

**4-Methyl-*N*-(4-(*p*-tolyl)-1-(1-(*p*-tolyl)vinyl)-1H-1,2,3-triazol-5-yl)benzenesulfonamide (3cc)**

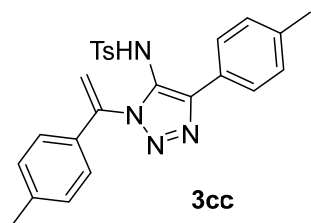

Following the General Procedure II, using **1c** (50.0 mg, 0.114 mmol), tripotassium phosphate (48.4 mg, 0.228 mmol) and 1-(1-azidovinyl)-4-methylbenzene **2c** (54.3 mg,

0.341 mmol). The crude was purified by column chromatography (hexane/EtOAc, 3:1) to afford **3cc** (35.5 mg, 70% yield) as an orange solid. m.p. 186-187 °C. <sup>1</sup>H NMR (400 MHz, d<sub>6</sub>-DMSO) δ 10.59 (br, 1H), 7.45 (d, *J* = 8.1 Hz, 2H), 7.31 (d, *J* = 8.2 Hz, 2H), 7.21 (d, *J* = 8.1 Hz, 2H), 7.07 (d, *J* = 8.2 Hz, 2H), 7.01 - 6.96 (m, 4H), 6.07 (s, 1H), 5.52 (s, 1H), 2.34 (s, 3H), 2.29 (s, 3H), 2.21 (s, 3H) ; <sup>13</sup>C NMR (100 MHz, d<sub>6</sub>-DMSO) δ 143.4, 141.6, 140.1, 138.9, 137.4, 137.3, 132.0, 129.2 (CH×2), 129.1 (CH×2), 128.8 (CH×2), 127.7, 126.4 (CH×2), 126.4, 126.1 (CH×2), 125.8 (CH×2), 114.4, 20.9, 20.9, 20.8. IR (ATR) ν 3000, 2922, 2826, 2758, 1641, 1586, 1511, 1448, 1343, 1256, 1163, 1091. HRMS (EI) *m/z* : [M+H]<sup>+</sup> calcd. for C<sub>25</sub>H<sub>24</sub>N<sub>4</sub>O<sub>2</sub>S: 444.1620, found: 444.1629.

***N*-(4-(4-Chlorophenyl)-1-(1-(4-chlorophenyl)vinyl)-1H-1,2,3-triazol-5-yl)-4-methylbenzenesulfonamide (3hb)**

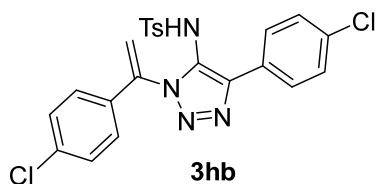

Following the General Procedure II, using **1h** (50.0 mg, 0.109 mmol), tripotassium phosphate (46.3 mg, 0.218 mmol) and 1-(1-azidovinyl)-4-chlorobenzene **2b** (58.6 mg, 0.326 mmol). The crude was purified by column chromatography (hexane/EtOAc, 3:1) to afford **3hb** (31.7 mg, 60% yield) as a white solid. m.p. 206-207 °C. <sup>1</sup>H NMR (400 MHz, d<sub>6</sub>-DMSO) δ 10.75 (br, 1H), 7.53 (d, *J* = 8.4 Hz, 2H), 7.48 (d, *J* = 8.5 Hz, 2H), 7.32 (d, *J* = 8.0 Hz, 2H), 7.25 (d, *J* = 8.7 Hz, 2H), 7.23 (d, *J* = 8.7 Hz, 2H), 7.00 (d, *J* = 8.0 Hz, 2H), 6.23 (s, 1H), 5.67 (s, 1H), 2.23 (s, 3H) ; <sup>13</sup>C NMR (100 MHz, d<sub>6</sub>-DMSO) δ 143.7, 140.5, 138.9, 137.1, 134.0, 133.5, 132.8, 129.3 (CH×2), 128.6 (CH×2), 128.4, 128.3 (CH×2), 127.9, 127.8 (CH×4), 126.5 (CH×2), 116.3, 21.0. IR (ATR) ν 3053, 3972, 2923, 2826, 2751, 1644, 1596, 1489, 1367, 1165, 1086. HRMS (EI) *m/z* : [M+H]<sup>+</sup> calcd. for C<sub>23</sub>H<sub>18</sub>Cl<sub>2</sub>N<sub>4</sub>O<sub>2</sub>S: 484.0528, found: 484.0520.

***N*-(4-(4-Chlorophenyl)-1-(1-(*p*-tolyl)vinyl)-1H-1,2,3-triazol-5-yl)-4-methylbenzenesulfonamide (3hc)**

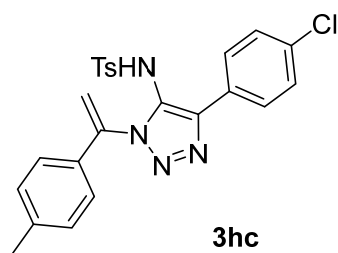

Following the General Procedure II, using 4-methoxybenzyl (*Z*)-2-(4-chlorophenyl)-*N*-tosylethanimidothioate **1h** (50.0 mg, 0.109 mmol), tripotassium phosphate (46.3 mg, 0.218 mmol) and 1-(1-azidovinyl)-4-methylbenzene **2c** (51.9 mg, 0.326 mmol). The crude was purified by column chromatography (hexane/EtOAc, 3:1) to afford **3hc** (32.4 mg, 64% yield) as a yellow solid. m.p. 191-192 °C. <sup>1</sup>H NMR (400 MHz, d<sub>6</sub>-DMSO) δ 10.68 (br, 1H), 7.52 (d, *J* = 8.4 Hz, 2H), 7.31 (d, *J* = 8.0 Hz, 2H), 7.24 - 7.21 (m, 4H), 7.09 (d, *J* = 8.0 Hz, 2H), 7.00 (d, *J* = 8.3 Hz, 2H), 6.12 (s, 1H), 5.56 (s, 1H), 2.34 (s, 3H), 2.24 (s, 3H); <sup>13</sup>C NMR (100 MHz, d<sub>6</sub>-DMSO) δ 144.7, 140.5, 140.0, 139.0, 137.3, 132.7, 132.0, 129.3 (CH×2), 129.2 (CH×2), 128.4, 128.3 (CH×2), 128.0, 127.8 (CH×2), 126.5 (CH×2), 125.8 (CH×2), 114.7, 21.0, 20.8. IR (ATR) ν 3031, 2920, 2836, 2782, 1641, 1610, 1493, 1340, 1250, 1163, 1090. HRMS (EI) *m/z*: [M+H]<sup>+</sup> calcd. for C<sub>24</sub>H<sub>21</sub>ClN<sub>4</sub>O<sub>2</sub>S: 464.1074, found: 464.1068.

***N*-(1,4-Diphenyl-1H-1,2,3-triazol-5-yl)-4-methylbenzenesulfonamide (5aa)**

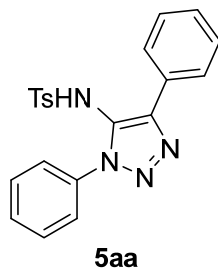

Following the General Procedure III, using *N*-sulfonylthioimidate **1a'** (100.0 mg, 0.253 mmol), tripotassium phosphate (107.4 mg, 0.506 mmol) and azidobenzene **4a** (90.3 mg,



0.758 mmol). The crude was purified by column chromatography (hexane/EtOAc, 4:1) to afford **5aa** (69.2 mg, 70% yield) as a white solid. m.p. 235-236 °C. <sup>1</sup>H NMR (400 MHz, d-acetone) δ 9.28 (br, 1H), 7.79 – 7.76 (m, 2H), 7.62 – 7.56 (m, 2H), 7.55 – 7.51 (m, , 3H), 7.34 – 7.23 (m, 5H), 6.99 (d, *J* = 7.9 Hz, 2H), 2.29 (s, 3H) ; <sup>13</sup>C NMR (100 MHz, d<sub>6</sub>-DMSO) δ 143.5, 142.4, 136.9, 135.1, 129.5 (CH×2), 129.4, 129.3, 128.5, 128.1, 127.3, 126.3, 126.3, 124.8, 21.0. IR (ATR) ν 3261, 1699, 1601, 1373, 1336, 1161, 830, 725, 695. HRMS (EI) *m/z* : [M+H]<sup>+</sup> calcd. for C<sub>21</sub>H<sub>18</sub>N<sub>4</sub>O<sub>2</sub>S: 390.1150, found: 390.1156.

#### 4-Methyl-*N*-(4-phenyl-1-(*p*-tolyl)-1*H*-1,2,3-triazol-5-yl)benzenesulfonamide (**5ab**)

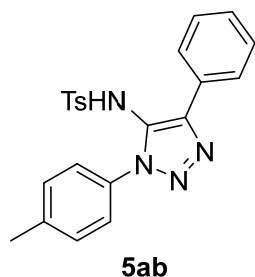

Following the General Produce III, using benzyl (*Z*)-2-phenyl-*N*-tosylethanimidothioate **1a'** (100.0 mg, 0.253 mmol), tripotassium phosphate (107.4 mg, 0.506 mmol) and 1-azido-4-methylbenzene **4b** (100.9 mg, 0.758 mmol) and DMSO (0.843 ml, 0.3M). The crude was purified by column chromatography (hexane/EtOAc, 4:1) to afford **5ab** (75.7 mg, 74% yield) as a white solid. m.p. 212-213 °C. <sup>1</sup>H NMR (400 MHz, d-acetone) δ 9.25 (br, 1H), 7.83 – 7.78 (m, 2H), 7.43 (d, *J* = 8.3 Hz, 2H), 7.31 – 7.28 (m, 7H), 7.01 (d, *J* = 8.0 Hz, 2H), 2.44 (s, 3H), 2.31 (s, 3H) ; <sup>13</sup>C NMR (100 MHz, d<sub>6</sub>-DMSO) δ 144.4, 143.3, 140.4, 137.5, 133.0, 130.5, 130.1, 129.7, 129.3, 129.0, 128.0, 126.9, 126.8, 125.2, 21.6, 21.4. IR (ATR) ν 3049, 1512, 1340, 1165, 1093, 986, 817, 727, 697, 656. HRMS (EI) *m/z* : [M+H]<sup>+</sup> calcd. for C<sub>22</sub>H<sub>20</sub>N<sub>4</sub>O<sub>2</sub>S: 404.1307, found: 404.1302.

***N*-(1-(4-Ethylphenyl)-4-phenyl-1*H*-1,2,3-triazol-5-yl)-4-methylbenzenesulfonamide (**5ac**)**

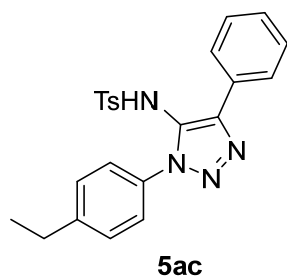

Following the General Procedure III, using benzyl (*Z*)-2-phenyl-*N*-tosylethanimidothioate **1a'** (100.0 mg, 0.253 mmol), tripotassium phosphate (107.4 mg, 0.506 mmol) and 1-azido-4-ethylbenzene **4c** (111.6 mg, 0.758 mmol). The crude was purified by column chromatography (hexane/EtOAc, 4:1) to afford **5ac** (75.2 mg, 71% yield) as a white solid. m.p. 213-214 °C. <sup>1</sup>H NMR (400 MHz, d<sub>6</sub>-DMSO) δ 10.78 (br, 1H), 7.78 – 7.70 (m, 2H), 7.40 (d, *J* = 8.4 Hz, 2H), 7.33 – 7.28 (m, 5H), 7.21 (d, *J* = 8.3 Hz, 2H), 6.95 (d, *J* = 8.0 Hz, 2H), 2.69 (q, *J* = 7.6 Hz, 2H), 2.23 (s, 3H), 1.24 (t, *J* = 7.6 Hz, 3H). ; <sup>13</sup>C NMR (100 MHz, d<sub>6</sub>-DMSO) δ 145.2, 143.2, 142.3, 137.0, 132.7, 129.4, 129.3, 128.4, 128.4, 127.9, 127.1, 126.1 (CH×2), 124.6, 27.8, 20.9, 15.3. IR (ATR) ν 3057, 1735, 1596, 1569, 1514, 1341, 1165, 1091, 986, 880, 838, 815, 724, 693, 661. HRMS (EI) *m/z* : [M+H]<sup>+</sup> calcd. for C<sub>23</sub>H<sub>22</sub>N<sub>4</sub>O<sub>2</sub>S: 418.1463, found: 418.1461.

***N*-(1-(4-Methoxyphenyl)-4-phenyl-1*H*-1,2,3-triazol-5-yl)-4-methylbenzenesulfonamide (**5ad**)**

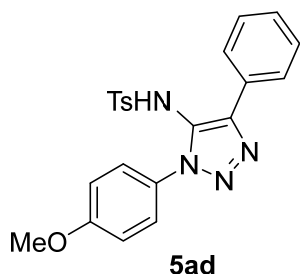

Following the General Procedure III, benzyl (*Z*)-2-phenyl-*N*-tosylethanimidothioate **1a'** (100.0 mg, 0.253 mmol), tripotassium phosphate (107.4 mg, 0.506 mmol) and 1-azido-4-methoxybenzene **4d** (113.1 mg, 0.758 mmol). The crude was purified by column

chromatography (hexane/EtOAc, 4:1) to afford **5ad** (75.5 mg, 71% yield) as a white solid. m.p. 203-204 °C. <sup>1</sup>H NMR (400 MHz, d-acetone) δ 7.83 – 7.76 (m, 2H), 7.46 (d, *J* = 9.1 Hz, 2H), 7.34 – 7.26 (m, 5H), 7.04 – 6.98 (m, 4H), 3.90 (s, 3H), 2.30 (s, 3H). ; <sup>13</sup>C NMR (100 MHz, d<sub>6</sub>-DMSO) δ 159.8, 143.2, 142.1, 137.2, 129.4, 129.4, 128.4, 127.9, 127.9, 127.3, 126.2, 126.2, 126.1, 114.3, 55.6, 20.9. IR (ATR) ν 3241, 1598, 1515, 1252, 1164, 815, 693, 1489. HRMS (EI) *m/z* : [M+H]<sup>+</sup> calcd. for C<sub>22</sub>H<sub>20</sub>N<sub>4</sub>O<sub>3</sub>S: 420.1256, found: 420.1253.

***N*-(1-(4-Chlorophenyl)-4-phenyl-1*H*-1,2,3-triazol-5-yl)-4-methylbenzenesulfonamide (**5ae**)**

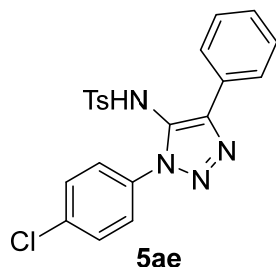

Following the General Procedure III, using benzyl (Z)-2-phenyl-*N*-tosylethanimidothioate **1a'** (100.0 mg, 0.253 mmol), tripotassium phosphate (107.4 mg, 0.506 mmol) and 1-azido-4-chlorobenzene **4e** (116.4mg, 0.758 mmol). The crude was purified by column chromatography (hexane/EtOAc, 4:1) to afford **5ae** (70.9 mg, 66% yield) as a white solid. m.p. 238-239 °C. <sup>1</sup>H NMR (400 MHz, d-acetone) δ 7.84 – 7.80 (m, 2H), 7.62 – 7.58 (m, 2H), 7.55 – 7.51 (m, 2H), 7.35 – 7.29 (m, 5H), 7.03 (d, *J* = 8.0, 2H), 2.33 (s, 3H). ; <sup>13</sup>C NMR (100 MHz, d<sub>6</sub>-DMSO) δ 143.5, 142.4, 136.9, 134.2, 133.7, 129.4, 129.3, 129.1, 128.4, 128.1, 127.3, 126.3, 126.1 (CH×2), 21.0. IR (ATR) ν 3061, 1743, 1580, 1492, 1405, 1339, 1163, 1091, 985, 832, 724, 695, 655. HRMS (EI) *m/z* : [M+H]<sup>+</sup> calcd. for C<sub>21</sub>H<sub>17</sub>ClN<sub>4</sub>O<sub>2</sub>S: 424.0761, found: 424.0756.

***N*-(1-(2-Chlorophenyl)-4-phenyl-1H-1,2,3-triazol-5-yl)-4-methylbenzenesulfonamide (5af)**

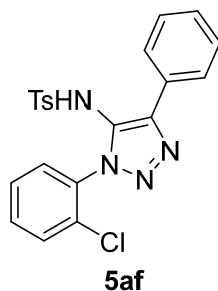

Following the General Procedure III, using benzyl (Z)-2-phenyl-N-tosylethanimidothioate **1a'** (100.0 mg, 0.253 mmol), tripotassium phosphate (107.4 mg, 0.506 mmol) and 1-azido-2-chlorobenzene **4f** (116.4 mg, 0.758 mmol). The crude was purified by column chromatography (hexane/EtOAc, 4:1) to afford **5af** (80.6 mg, 75% yield) as a white solid. m.p. 195-196 °C. <sup>1</sup>H NMR (400 MHz, d-acetone) δ 9.31 (s, 1H), 7.73 (dd, *J* = 7.6, 1.9 Hz, 2H), 7.65 – 7.62 (m, 2H), 7.58 – 7.53 (m, 1H), 7.35 (d, *J* = 8.4 Hz, 2H), 7.30 – 7.24 (m, 3H), 7.03 (d, *J* = 8.3 Hz, 2H), 2.29 (s, 3H); <sup>13</sup>C NMR (100 MHz, d<sub>6</sub>-DMSO) δ 143.4, 141.1, 136.8, 132.4, 132.0, 130.4, 130.1, 129.4 (CH×2), 129.0, 128.8, 128.3, 127.9, 127.9, 126.2, 126.1, 20.9. IR (ATR) ν 3043, 1589, 1489, 1341, 1159, 1087, 875, 758, 694. HRMS (EI) *m/z*: [M+H]<sup>+</sup> calcd. for C<sub>21</sub>H<sub>17</sub>ClN<sub>4</sub>O<sub>2</sub>S: 424.0761, found: 424.0764.

***N*-(1-(4-Iodophenyl)-4-phenyl-1H-1,2,3-triazol-5-yl)-4-methylbenzenesulfonamide (5ag)**

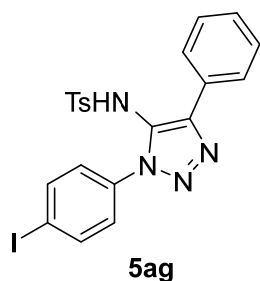

Following the General Procedure III, using benzyl (Z)-2-phenyl-N-tosylethanimidothioate **1a'** (100.0 mg, 0.253 mmol), tripotassium phosphate (107.4 mg, 0.506 mmol) and 1-azido-4-iodobenzene **4g** (185.7 mg, 0.758 mmol). The crude was

purified by column chromatography (hexane/EtOAc, 4:1) to afford **5ag** (111.0 mg, 85% yield) as a white solid. m.p. 238-239 °C. <sup>1</sup>H NMR (400 MHz, d-acetone) δ 7.88 – 7.82 (m, 4H), 7.40 – 7.36 (m, 2H), 7.35 – 7.28 (m, 5H), 7.04 (d, *J* = 7.9 Hz, 2H), 2.36 (s, 3H); <sup>13</sup>C NMR (100 MHz, d<sub>6</sub>-DMSO) δ 143.5, 142.5, 138.0, 136.9, 134.6, 129.4, 129.2, 128.4, 128.1, 127.1, 126.4, 126.2, 126.1, 96.0, 21.2. IR (ATR) ν 3076, 1743, 1592, 1489, 1403, 1339, 1157, 1088, 984, 884, 821, 723, 690, 653. HRMS (EI) *m/z*: [M+H]<sup>+</sup> calcd. for C<sub>21</sub>H<sub>17</sub>N<sub>4</sub>O<sub>2</sub>S: 516.0117, found: 516.0120.

***N*-(1-(4-Formylphenyl)-4-phenyl-1*H*-1,2,3-triazol-5-yl)-4-methylbenzenesulfonamide (**5ah**)**

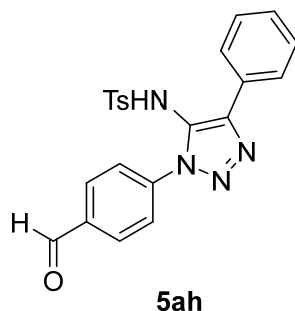

Following the General Procedure III, benzyl (*Z*)-2-phenyl-*N*-tosylethanimidothioate **1a'** (100.0 mg, 0.253 mmol), tripotassium phosphate (107.4 mg, 0.506 mmol) and 4-azidobenzaldehyde **4h** (111.5 mg, 0.758 mmol). The crude was purified by column chromatography (hexane/EtOAc, 4:1) to afford **5ah** (85.8 mg, 81% yield) as a white solid. m.p. 219-220 °C. <sup>1</sup>H NMR (400 MHz, d-acetone) δ 10.16 (s, 1H), 8.08 – 8.06 (d, *J* = 8.6 Hz, 2H), 7.86 (d, *J* = 8.4 Hz, 2H), 7.82 – 7.78 (m, 2H), 7.34 – 7.29 (m, 5H), 6.99 (d, *J* = 8.0 Hz, 2H), 2.26 (s, 3H); <sup>13</sup>C NMR (100 MHz, d<sub>6</sub>-DMSO) δ 192.4, 143.5, 142.7, 139.3, 136.7, 136.2, 130.4, 129.4, 129.0, 128.4, 128.2, 127.3, 126.2, 126.2, 125.0, 20.9. IR (ATR) ν 3083, 3972, 1699, 1602, 1372, 1339, 1161, 1093, 987, 725, 695, 657. HRMS (EI) *m/z*: [M+H]<sup>+</sup> calcd. for C<sub>22</sub>H<sub>18</sub>N<sub>4</sub>O<sub>3</sub>S: 418.1100, found: 418.1102.

**Methyl 4-(5-((4-methylphenyl)sulfonamido)-4-phenyl-1H-1,2,3-triazol-1-yl)benzoate (5ai)**

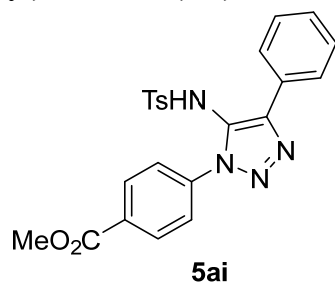

Following the General Procedure III, using benzyl (Z)-2-phenyl-N-tosylethanimidothioate **1a'** (100.0 mg, 0.253 mmol), tripotassium phosphate (107.4 mg, 0.506 mmol) and methyl 4-azidobenzoate **4i** (134.3 mg, 0.758 mmol). The crude was purified by column chromatography (hexane/EtOAc, 4:1) to afford **5ai** (86.2 mg, 76% yield) as a yellow solid. m.p. 238-239 °C. <sup>1</sup>H NMR (400 MHz, d-acetone) δ 9.47 (s, 1H), 8.10 (d, *J* = 8.5 Hz, 2H), 7.84 – 7.81 (m, 2H), 7.75 (d, *J* = 8.5 Hz, 2H), 7.37 – 7.27 (m, 5H), 6.98 (d, *J* = 8.1 Hz, 2H), 3.97 (s, 3H), 2.26 (s, 3H); <sup>13</sup>C NMR (100 MHz, d<sub>6</sub>-DMSO) δ 165.9, 143.9, 143.1, 138.8, 137.3, 130.6, 130.4, 129.8, 129.3, 128.9, 128.7, 127.9, 126.6, 126.4, 125.0, 53.0, 21.1. IR (ATR) ν 3291, 2919, 2850, 1614, 1531, 1236, 1094, 770, 668. HRMS (EI) *m/z*: [M+H]<sup>+</sup> calcd. for C<sub>23</sub>H<sub>20</sub>N<sub>4</sub>O<sub>4</sub>S: 448.1205, found: 448.1201.

**4-Methyl-N-(4-phenyl-1-(1-phenylethyl)-1H-1,2,3-triazol-5-yl)benzenesulfonamide (6)**

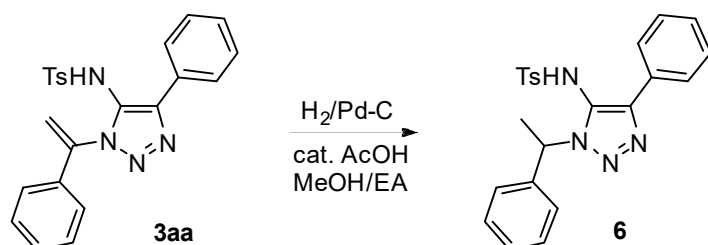

To a solution of the 4-methyl-N-(4-phenyl-1-(1-phenylvinyl)-1H-1,2,3-triazol-5-yl)benzenesulfonamide **3aa** (50 mg, 0.120 mmol, 1.0 equiv) in cosolvent MeOH/EA

(1/2, 0.3M) was added Pd/C catalyst (10%wt, 5.0 mg). The resulting solution was stirred at room temperature under hydrogen balloon for 24 hours. After the reaction was completed, the mixture was filtered by celite and extracted with DCM for three times and the combined organic phase was washed with brine, dried over MgSO<sub>4</sub>, filtered and concentrated. The crude was purified by flash column chromatography to afford the desired product **6** (30.2 mg, 60%). <sup>1</sup>H NMR (400 MHz, d<sub>6</sub>-DMSO) δ 10.72 (s, 1H), 7.41-7.35 (m, 4H), 7.33 (t, *J* = 6.8 Hz, 5H), 7.17 (t, *J* = 7.3 Hz, 1H), 7.10 (t, *J* = 7.3 Hz, 2H), 6.99 (d, *J* = 8.1 Hz, 2H), 5.90 (q, *J* = 7.0 Hz, 1H), 2.18 (s, 3H), 1.91 (d, *J* = 7.0 Hz, 3H); <sup>13</sup>C NMR (100 MHz, d<sub>6</sub>-DMSO) δ 144.2, 141.7, 140.9, 136.7, 130.0 (CH×2), 129.8, 129.2 (CH×2), 128.5 (CH×2, CH), 127.9, 127.2, 127.1 (CH×2), 127.0 (CH×2), 126.5 (CH×2), 56.8, 21.8, 21.4. IR (ATR) ν 3088, 3059, 3034, 2990, 2924, 2812, 2743, 1586, 1495, 1451, 1420, 1339, 1240, 1164, 1090, 1066. HRMS (EI) *m/z*: [M+H]<sup>+</sup> calcd. for C<sub>23</sub>H<sub>22</sub>N<sub>4</sub>O<sub>2</sub>S: 418.1463, found: 418.1455.

#### Methyl (Z)-2-phenyl-N-tosylacetimidate (**7**)<sup>4</sup>

(b)

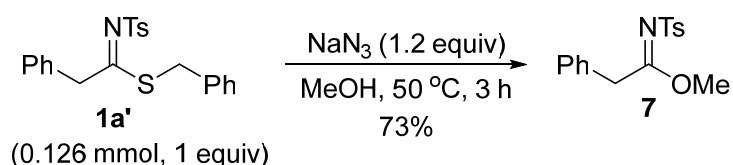

To a solution of *N*-thioacetimidate **1a'** (50.0 mg, 0.126 mmol, 1 equiv) in MeOH (0.42 mL, 0.3 M) was added NaN<sub>3</sub> (9.9 mg, 0.152 mmol, 1.2 equiv) and stirred at 50 °C under nitrogen atmosphere. The resulting reaction mixture was reacted for 3 hours until the reaction was complete as indicated by TLC. After the reaction was completed, the mixture was extracted with EtOAc for three times and the combined organic layer was washed with brine, dried over MgSO<sub>4</sub>, filtered and concentrated. The crude product was purified by column chromatography (hex/EtOAc = 4/1) to afford **7** (27.8 mg, 73%) as

a white solid.  $^1\text{H}$  NMR (400 MHz,  $\text{CDCl}_3$ )  $\delta$  7.84 (d,  $J = 8.3$  Hz, 2H), 7.37-7.26 (m, 7H), 4.26 (s, 2H), 3.71 (s, 3H), 2.43 (s, 3H).  $^{13}\text{C}$  NMR (100 MHz,  $\text{CDCl}_3$ )  $\delta$  173.6, 143.2, 138.9, 133.5, 129.6 (CH $\times$ 2), 129.3 (CH $\times$ 2), 128.6 (CH $\times$ 2), 127.2, 126.7 (CH $\times$ 2), 55.7, 39.5, 21.5.

#### References:

1. J.-Y. Wu, W.-J. Liao, X.-Y. Lin, C.-F. Liang, *Org. Biomol. Chem.*, 2020, **18**, 8881.
2. (a) R. R. Donthiri, V. Pappula, N. K. Reddy, D. Bairagi, S. Adimurthy, *J. Org. Chem.*, 2014, **79**, 11277; (b) B. Nie, W. Q. Wu, W. Zeng, Q. Ren, J. Zhang, Y. Zhang, H. Jiang, *Adv. Synth. Catal.*, 2020, **362**, 1362.
3. (a) A. C. A. Muraca, C. Raminelli, *ACS Omega*, 2020, **5**, 2240; (b) Y.-S. Li, C.-F. Liang, *J. Chin. Chem. Soc.*, 2022, **69**, 849.
4. E. J. Yoo, I. Bae, S. H. Cho, H. Han, S. Chang, *Org. Lett.*, 2006, **8**, 1347.



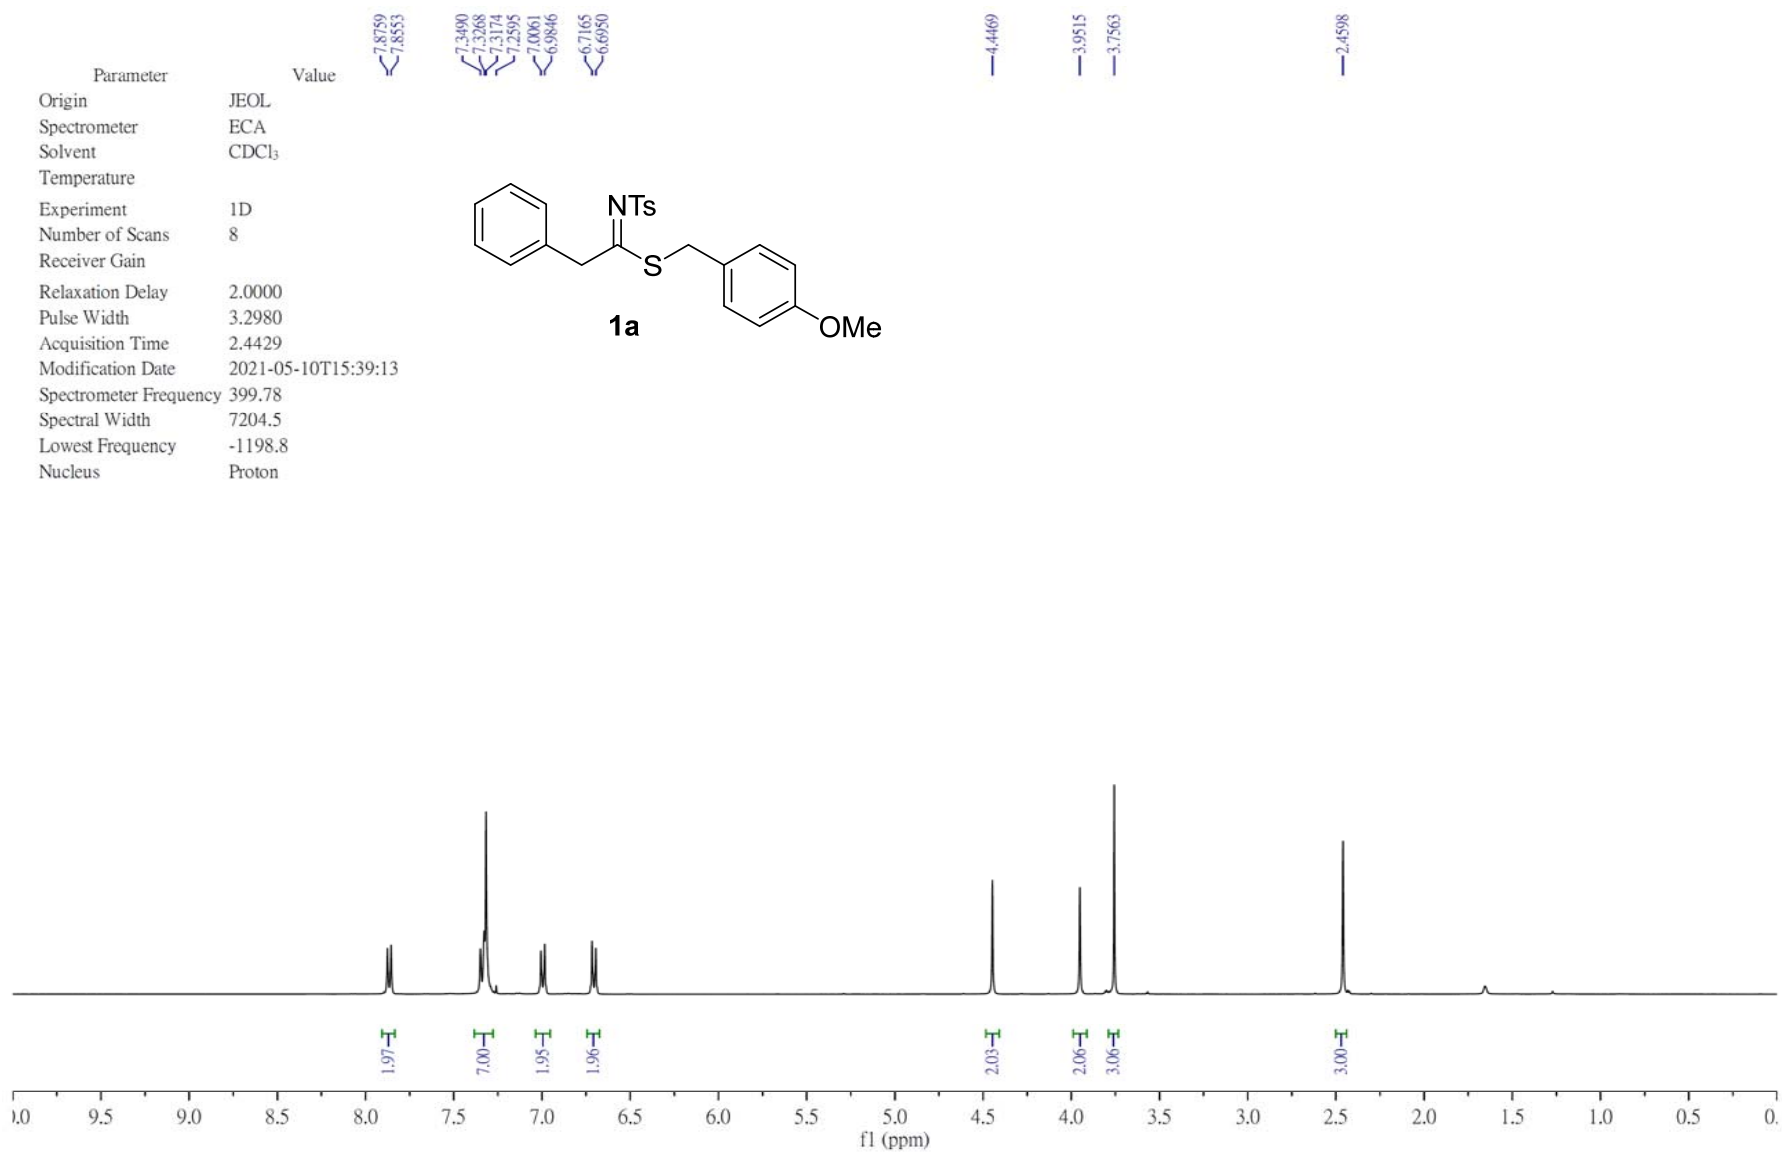

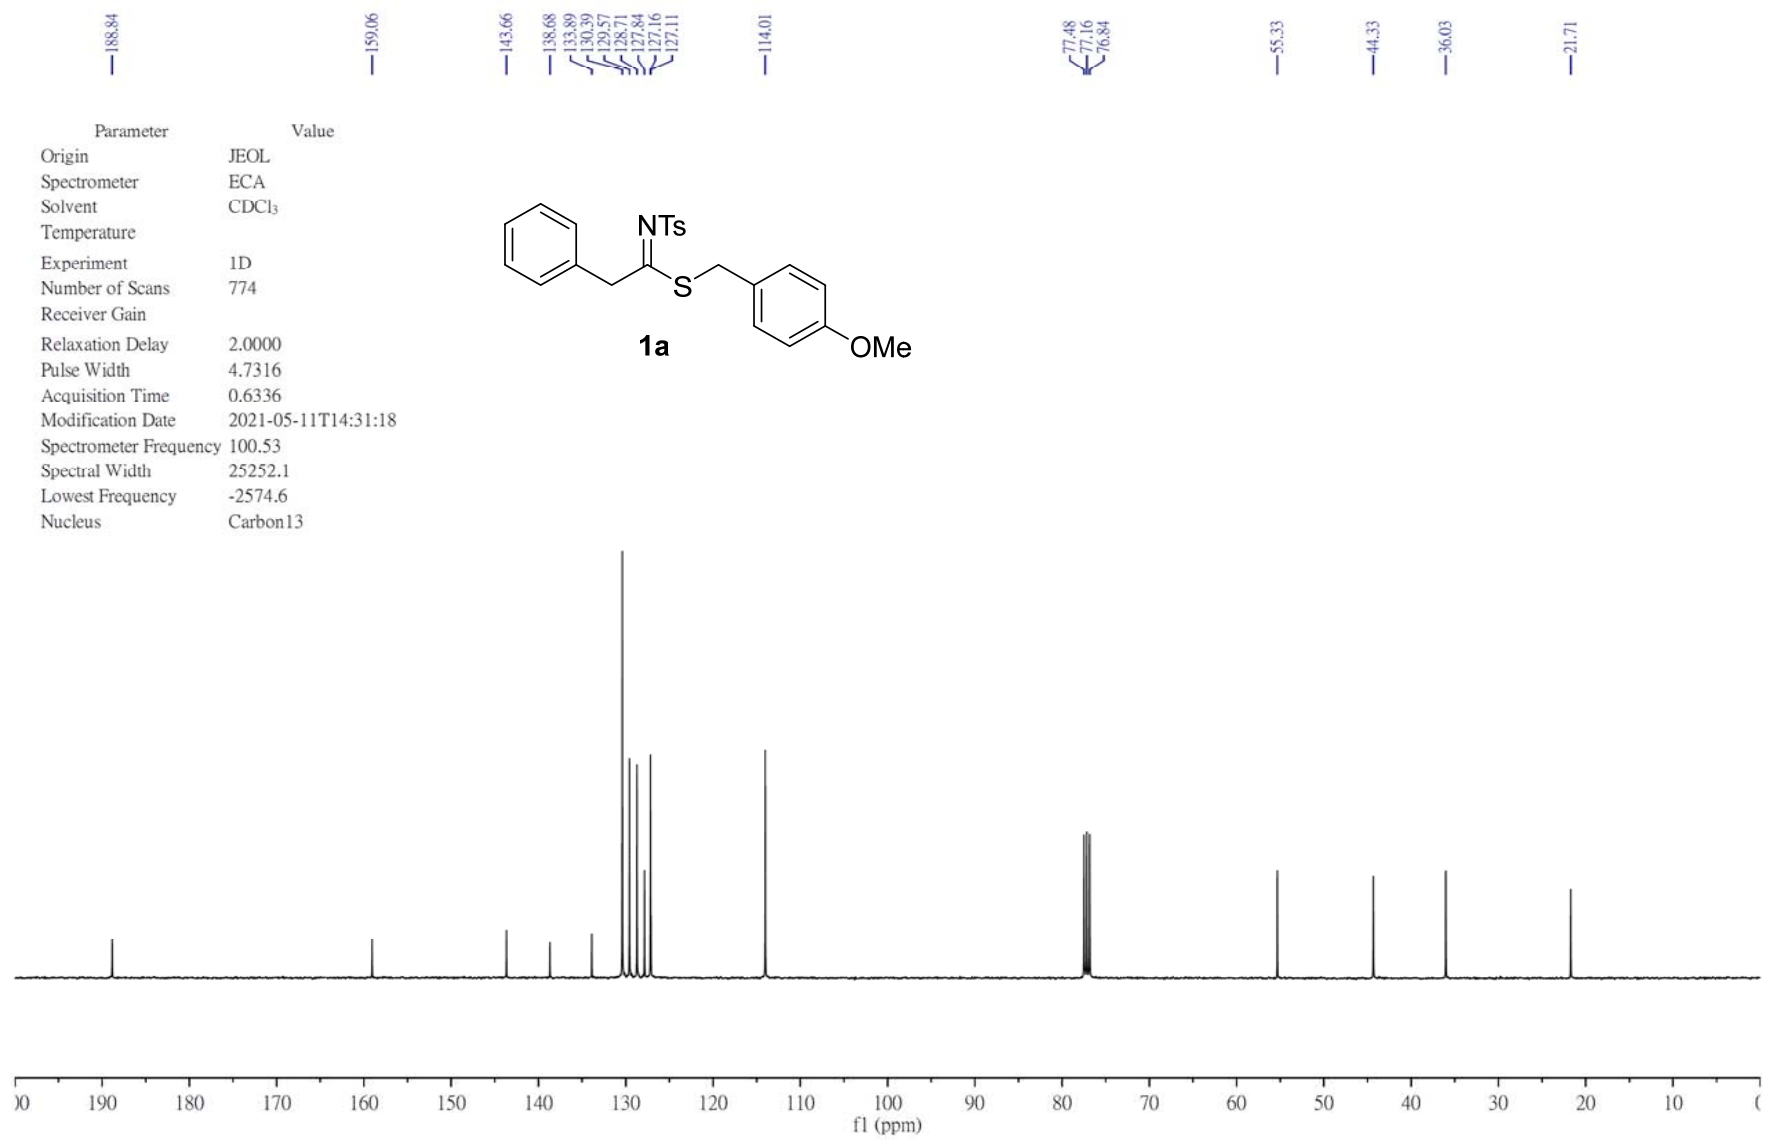

| Parameter              | Value               |
|------------------------|---------------------|
| Origin                 | JEOL                |
| Spectrometer           | ECA                 |
| Solvent                | CDCl <sub>3</sub>   |
| Temperature            |                     |
| Experiment             | 1D                  |
| Number of Scans        | 774                 |
| Receiver Gain          |                     |
| Relaxation Delay       | 2.0000              |
| Pulse Width            | 4.7316              |
| Acquisition Time       | 0.6336              |
| Modification Date      | 2021-05-11T14:31:18 |
| Spectrometer Frequency | 100.53              |
| Spectral Width         | 25252.1             |
| Lowest Frequency       | -2574.6             |
| Nucleus                | Carbon13            |

| Parameter              | Value               |
|------------------------|---------------------|
| Origin                 | JEOL                |
| Spectrometer           | ECA                 |
| Solvent                | CDCl <sub>3</sub>   |
| Temperature            |                     |
| Experiment             | 1D                  |
| Number of Scans        | 8                   |
| Receiver Gain          |                     |
| Relaxation Delay       | 2.0000              |
| Pulse Width            | 3.2980              |
| Acquisition Time       | 2.4429              |
| Modification Date      | 2021-05-10T15:58:09 |
| Spectrometer Frequency | 399.78              |
| Spectral Width         | 7204.5              |
| Lowest Frequency       | -1198.8             |
| Nucleus                | Proton              |

7.8777  
7.8571  
7.3480  
7.3276  
7.2595  
7.2376  
7.2161  
7.0009  
6.9794  
6.8568  
6.8354  
6.7136  
6.6921

4.3782

3.9294  
3.7912  
3.7541

2.4567

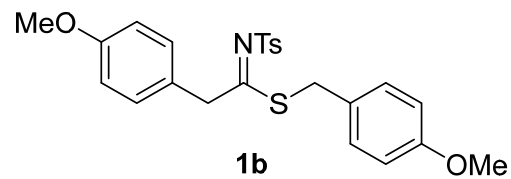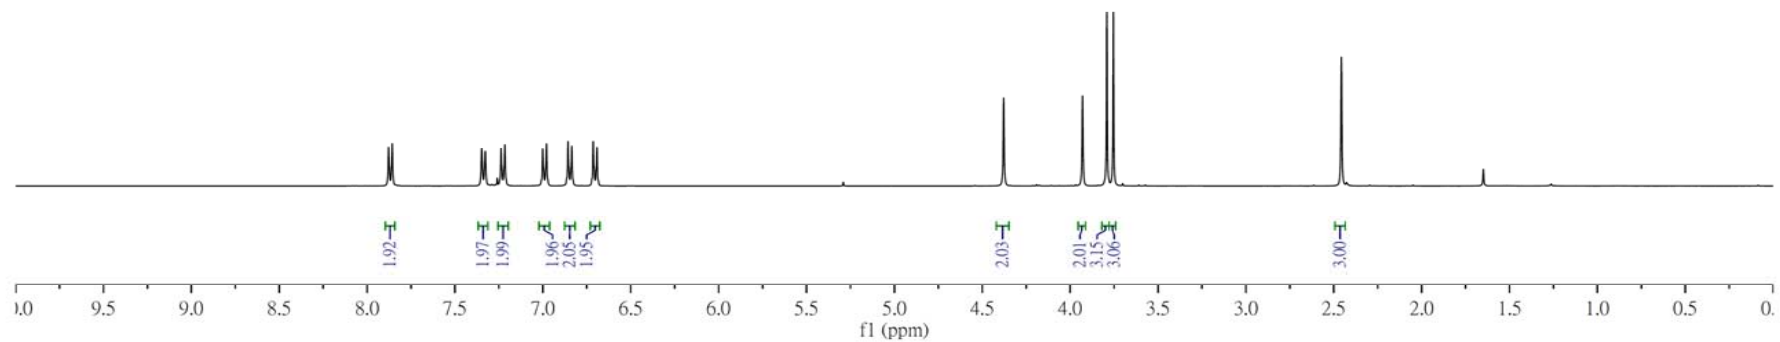

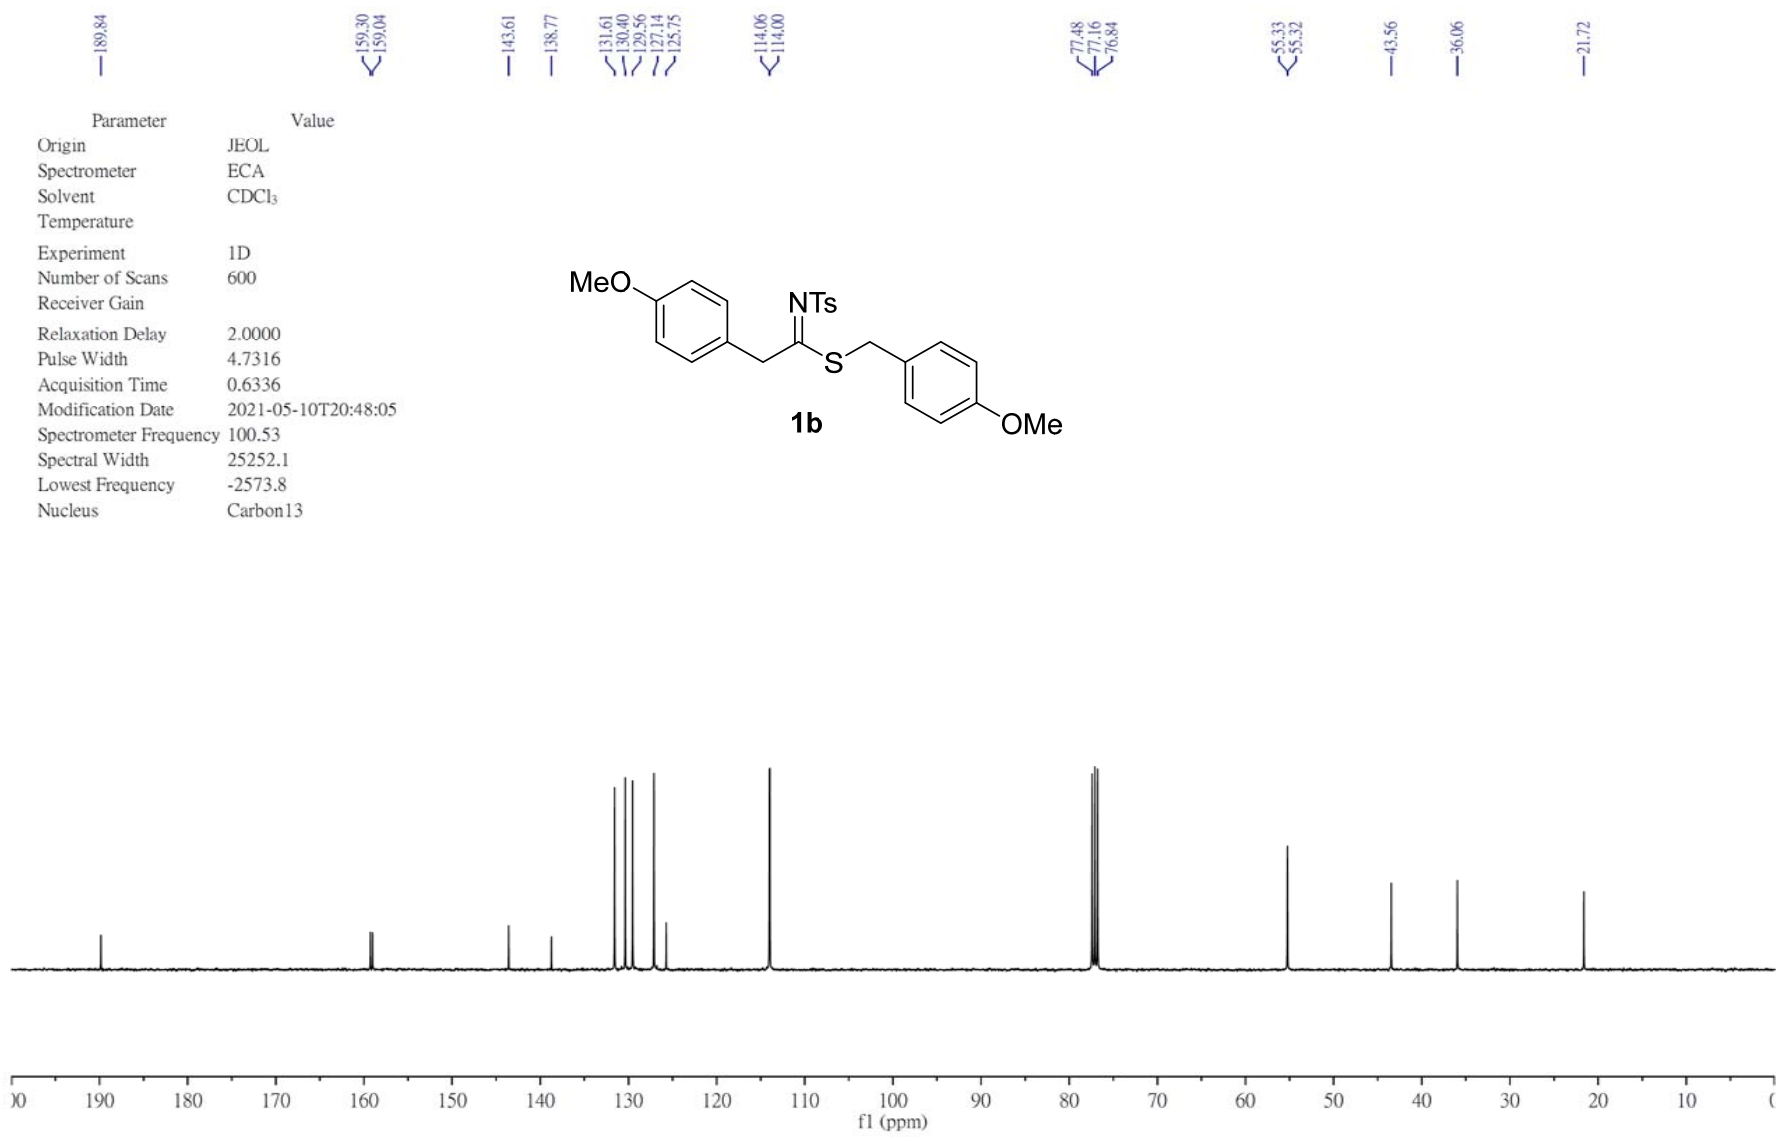

| Parameter              | Value               |
|------------------------|---------------------|
| Origin                 | Varian              |
| Spectrometer           | mercury             |
| Solvent                | "cdcl3"             |
| Temperature            | 25.0                |
| Pulse Sequence         | s2pul               |
| Experiment             | 1D                  |
| Number of Scans        | 16                  |
| Receiver Gain          | 39                  |
| Relaxation Delay       | 1.0000              |
| Pulse Width            | 0.0000              |
| Acquisition Time       | 2.5575              |
| Modification Date      | 2020-07-30T21:40:30 |
| Spectrometer Frequency | 400.43              |
| Spectral Width         | 6406.1              |
| Lowest Frequency       | -800.0              |
| Nucleus                | 1H                  |

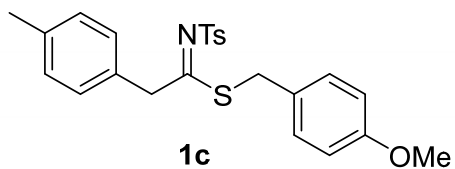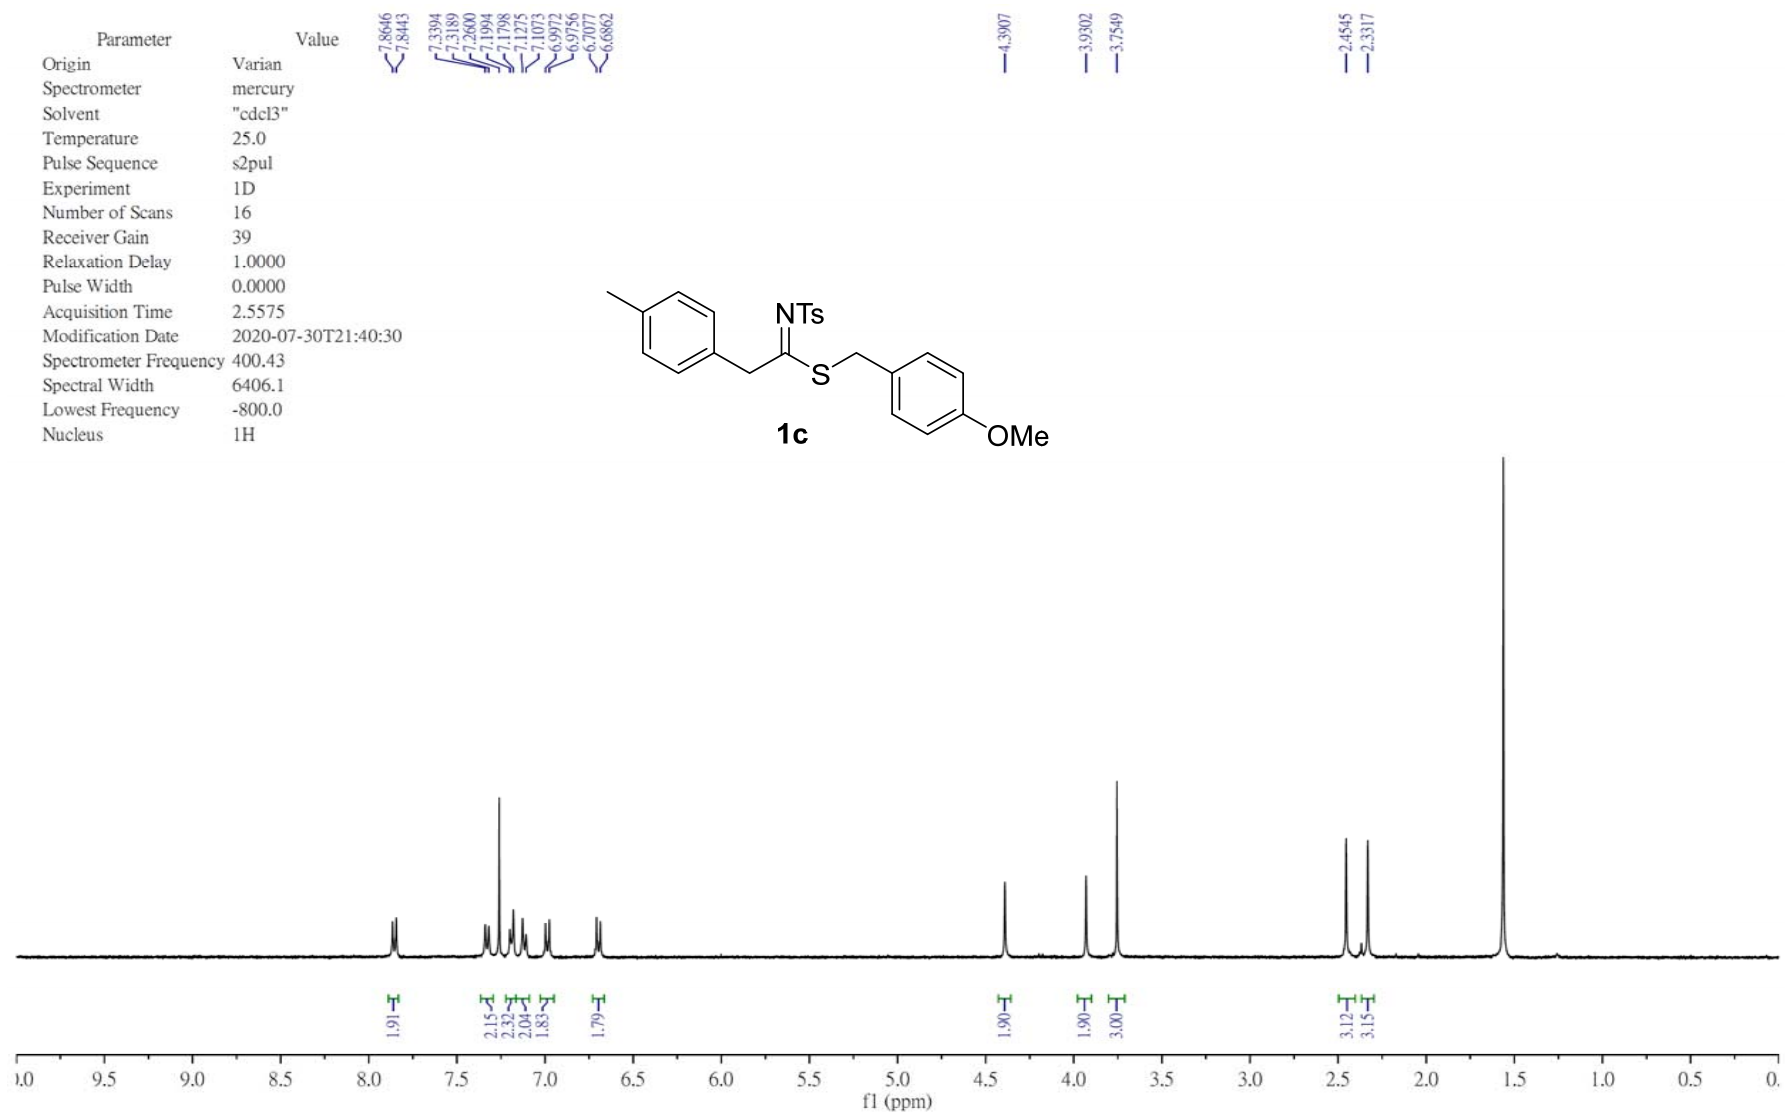

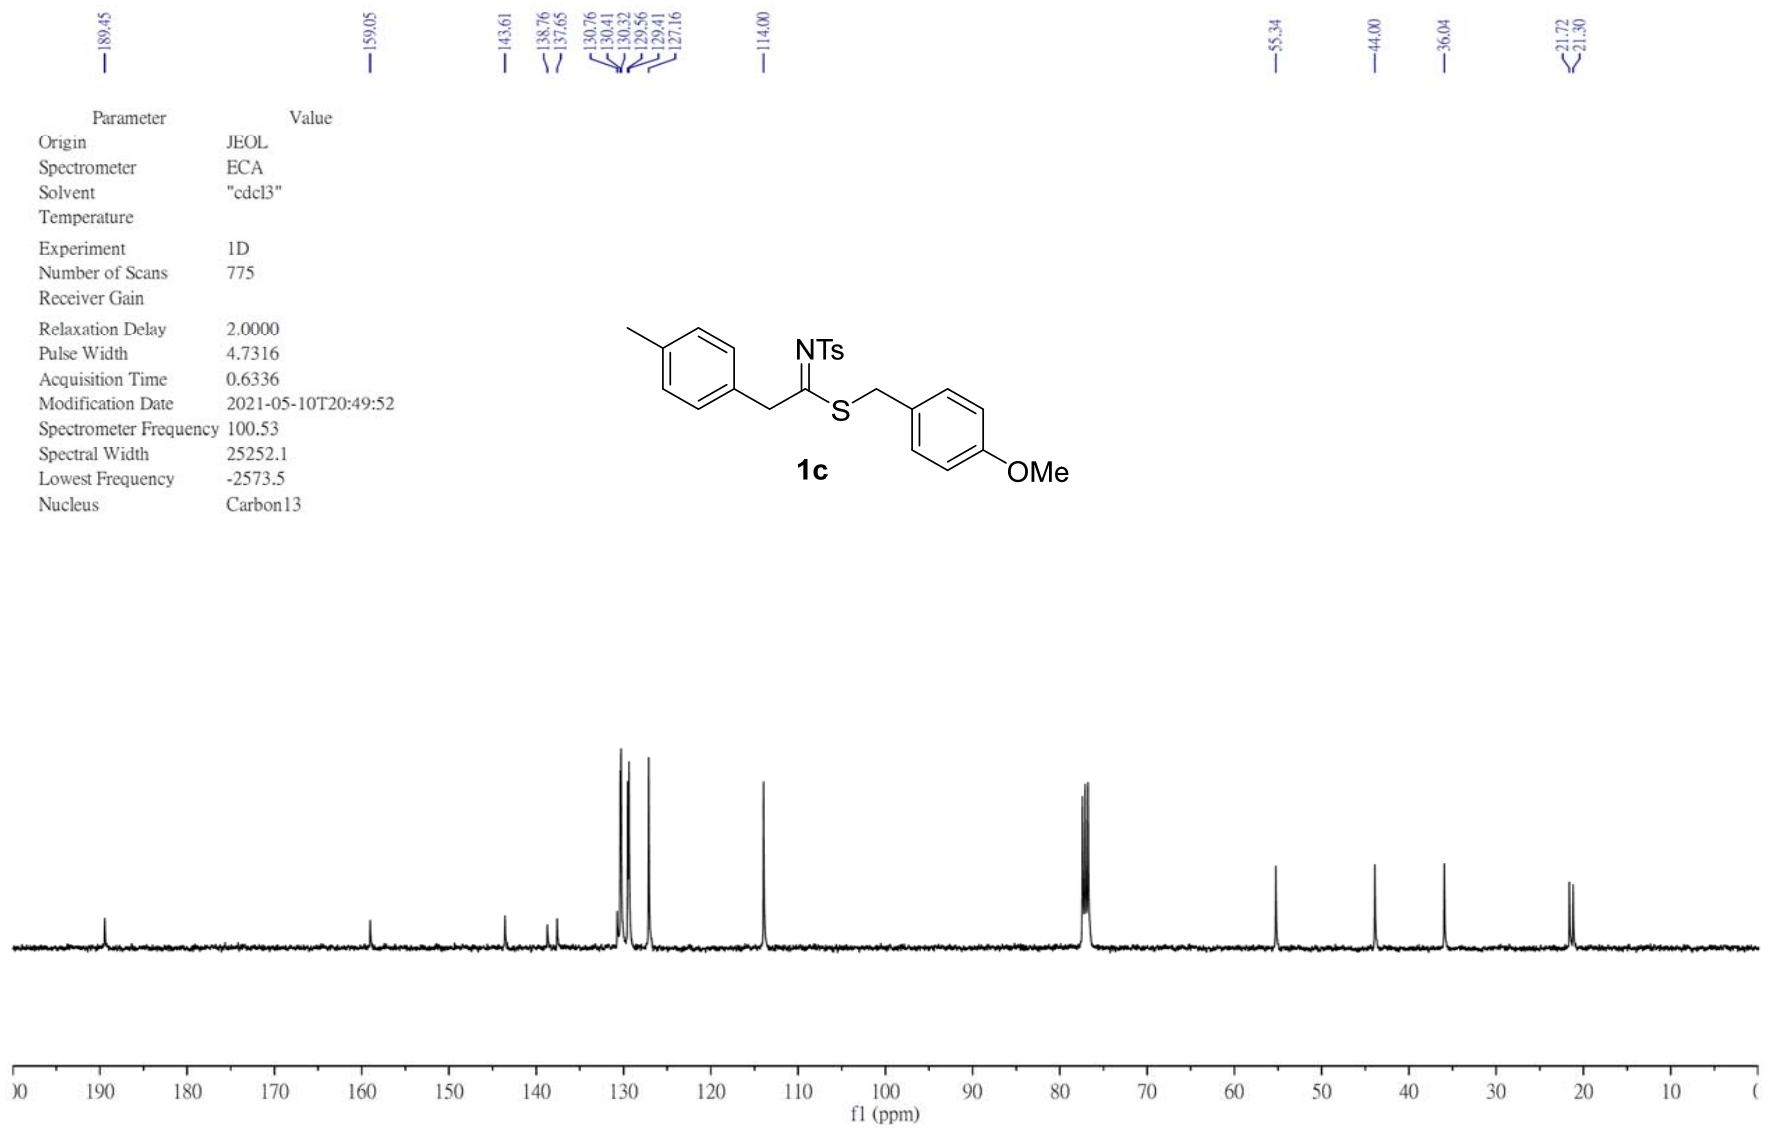

| Parameter              | Value               |
|------------------------|---------------------|
| Origin                 | Varian              |
| Spectrometer           | vmrs                |
| Solvent                | "cdcl3"             |
| Temperature            | 20.0                |
| Pulse Sequence         | s2pul               |
| Experiment             | 1D                  |
| Number of Scans        | 12                  |
| Receiver Gain          | 48                  |
| Relaxation Delay       | 1.0000              |
| Pulse Width            | 0.0000              |
| Acquisition Time       | 2.5559              |
| Modification Date      | 2021-05-10T22:58:00 |
| Spectrometer Frequency | 399.76              |
| Spectral Width         | 6410.3              |
| Lowest Frequency       | -799.6              |
| Nucleus                | 1H                  |

7.8602  
7.8394  
7.3400  
7.3199  
7.2433  
7.2238  
7.2042  
7.0044  
6.9827  
6.8999  
6.8809  
6.8550  
6.8435  
6.8231  
6.8178  
6.7102  
6.6885

4.4061

3.9453  
3.7790  
3.7568

2.4552

1.5711

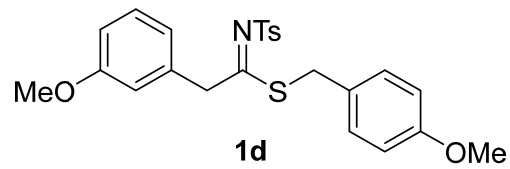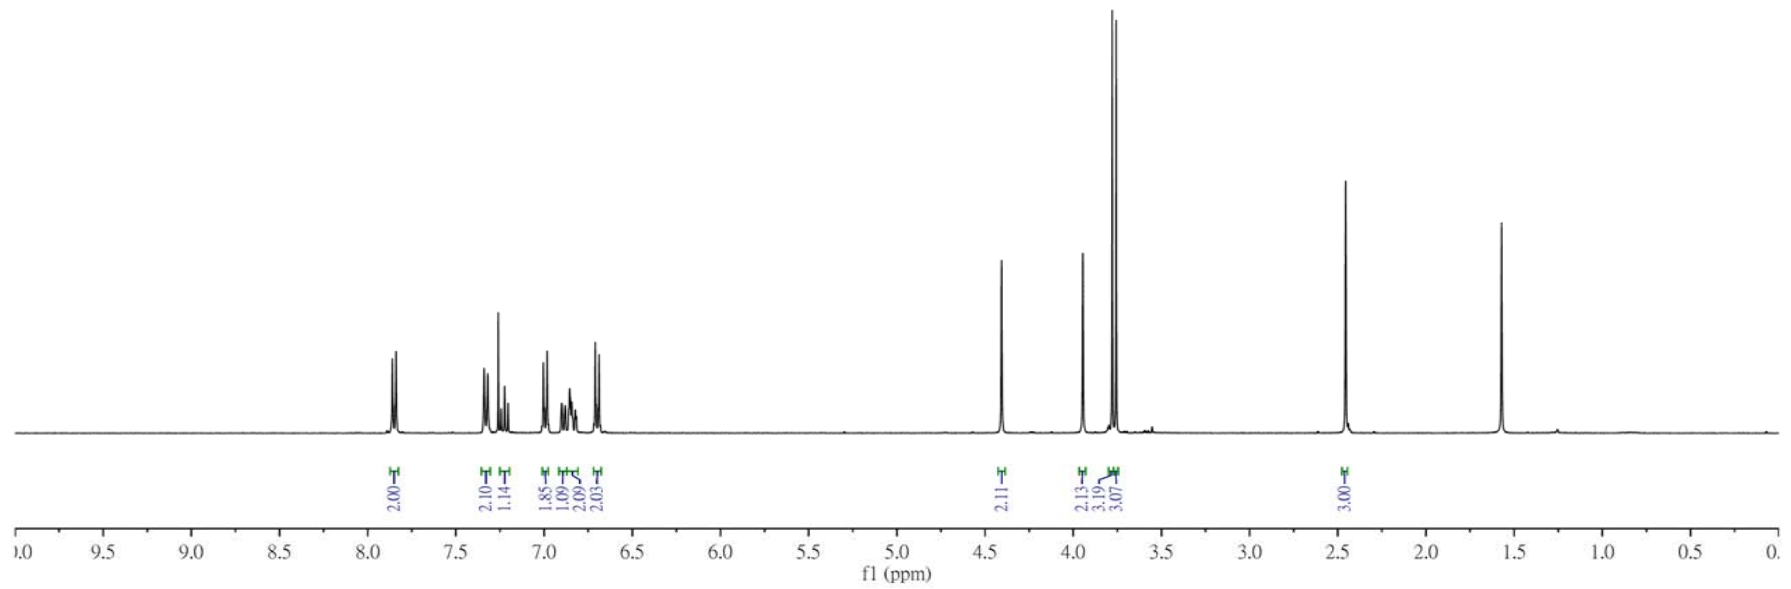

188.33

159.56  
158.86

143.52

138.46

135.13

130.19

129.50

129.41

126.95

122.45

115.54

113.81

113.27

77.48  
77.16  
76.84

55.07

44.06

35.75

21.49

| Parameter              | Value               |
|------------------------|---------------------|
| Origin                 | JEOL                |
| Spectrometer           | ECA                 |
| Solvent                | "cdcl3"             |
| Temperature            |                     |
| Experiment             | 1D                  |
| Number of Scans        | 948                 |
| Receiver Gain          |                     |
| Relaxation Delay       | 2.0000              |
| Pulse Width            | 4.7316              |
| Acquisition Time       | 0.6336              |
| Modification Date      | 2021-05-10T23:21:30 |
| Spectrometer Frequency | 100.53              |
| Spectral Width         | 25252.1             |
| Lowest Frequency       | -2597.1             |
| Nucleus                | Carbon13            |

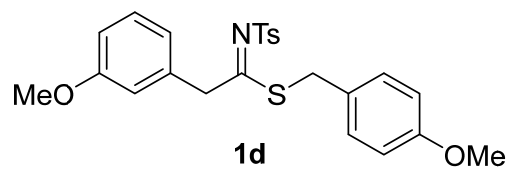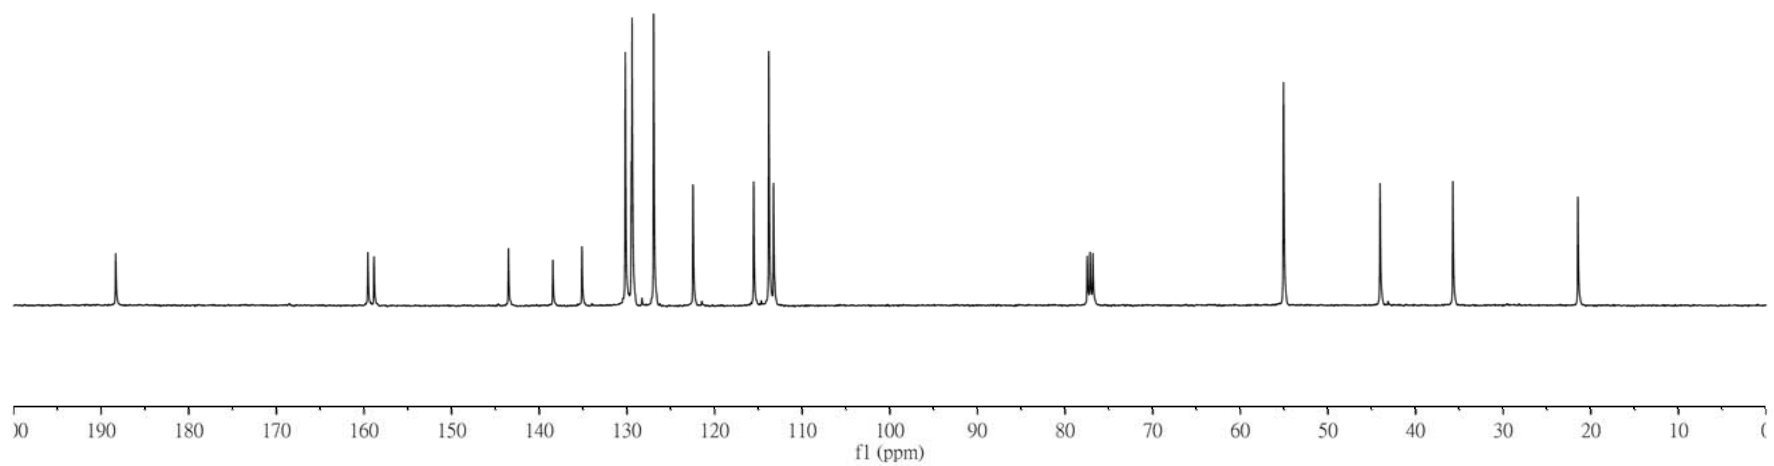



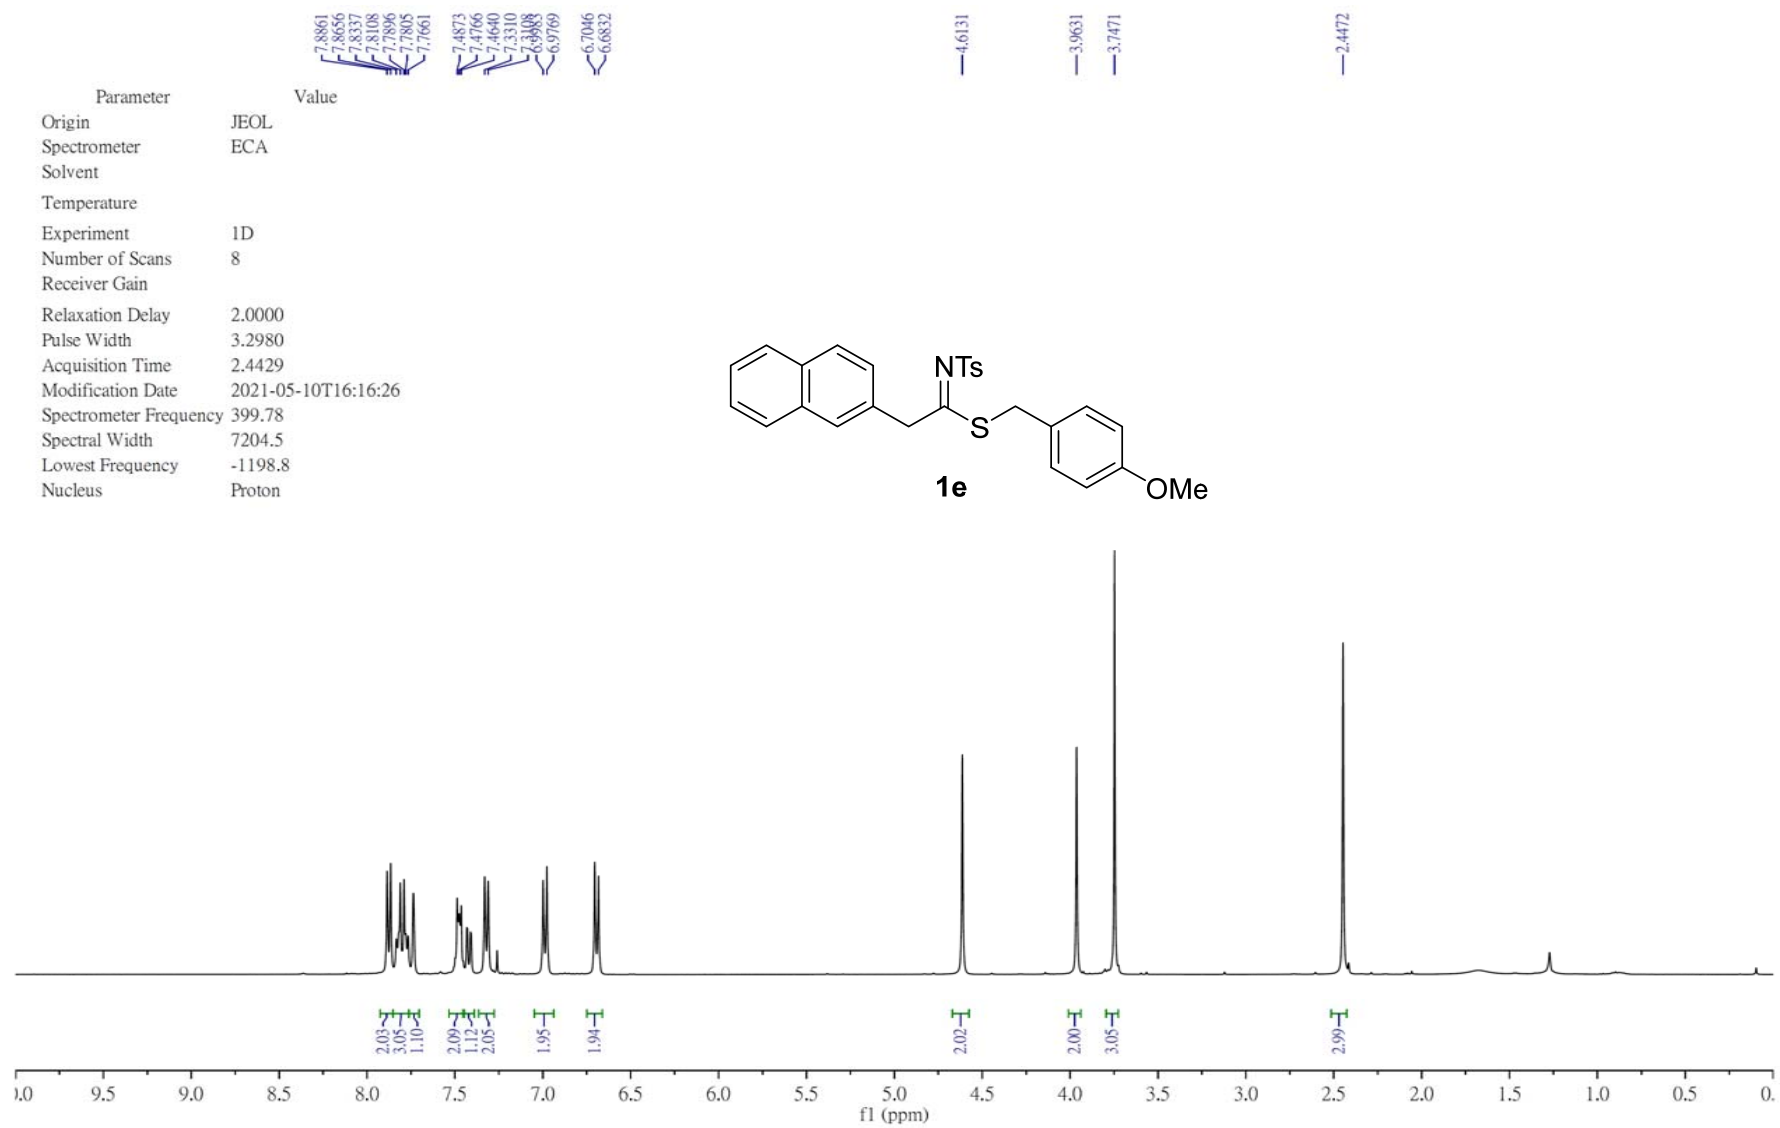

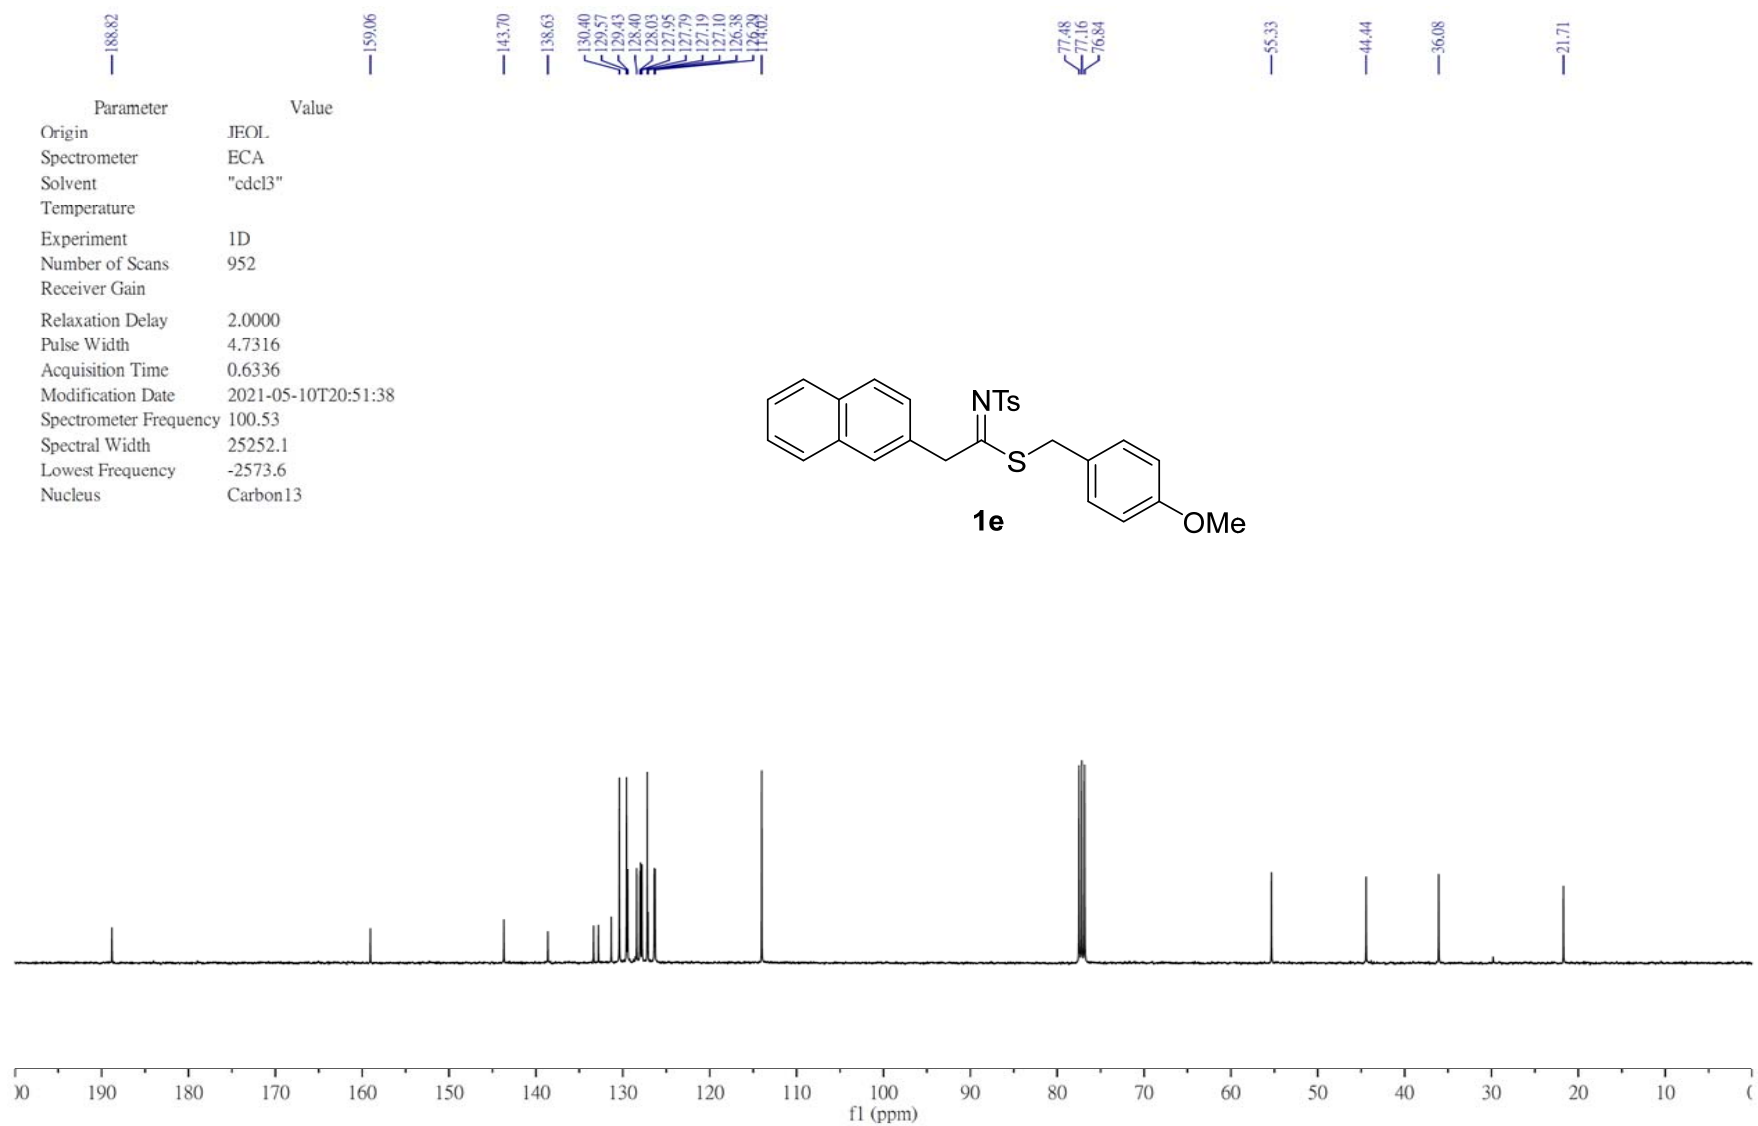

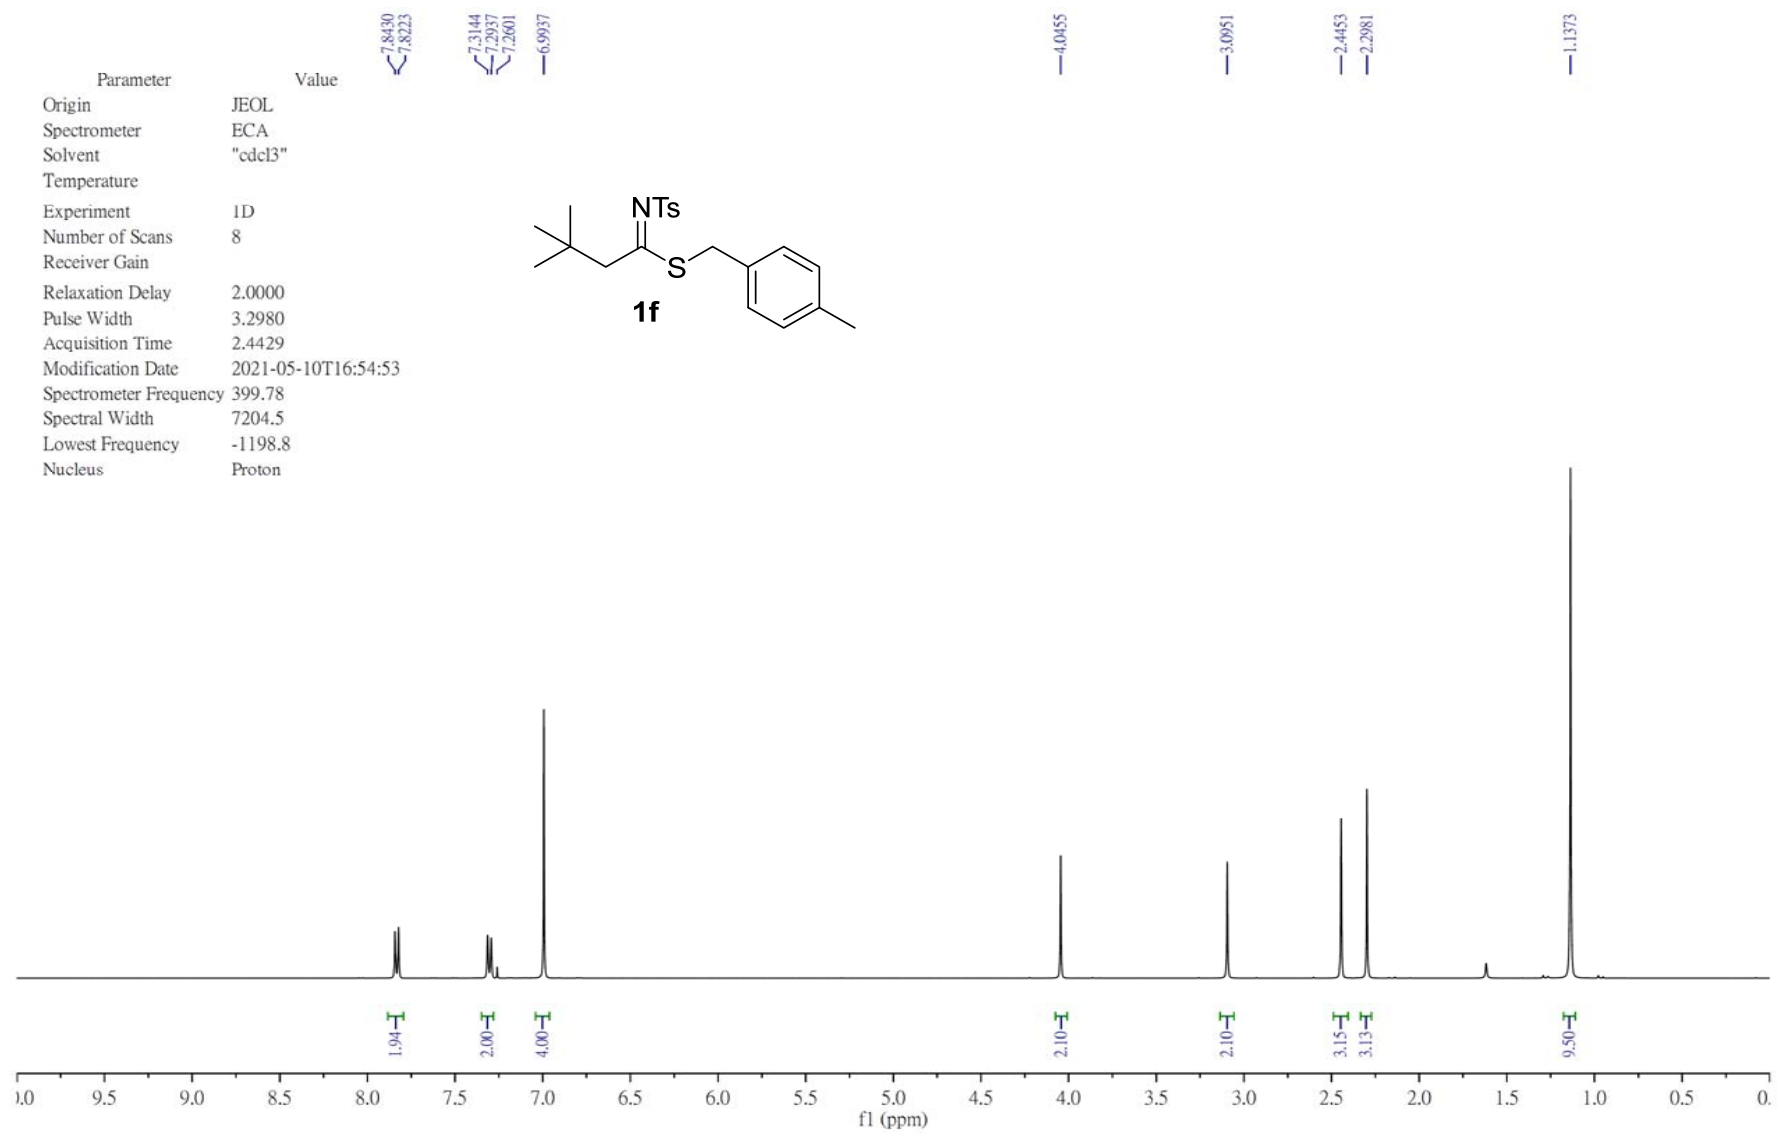

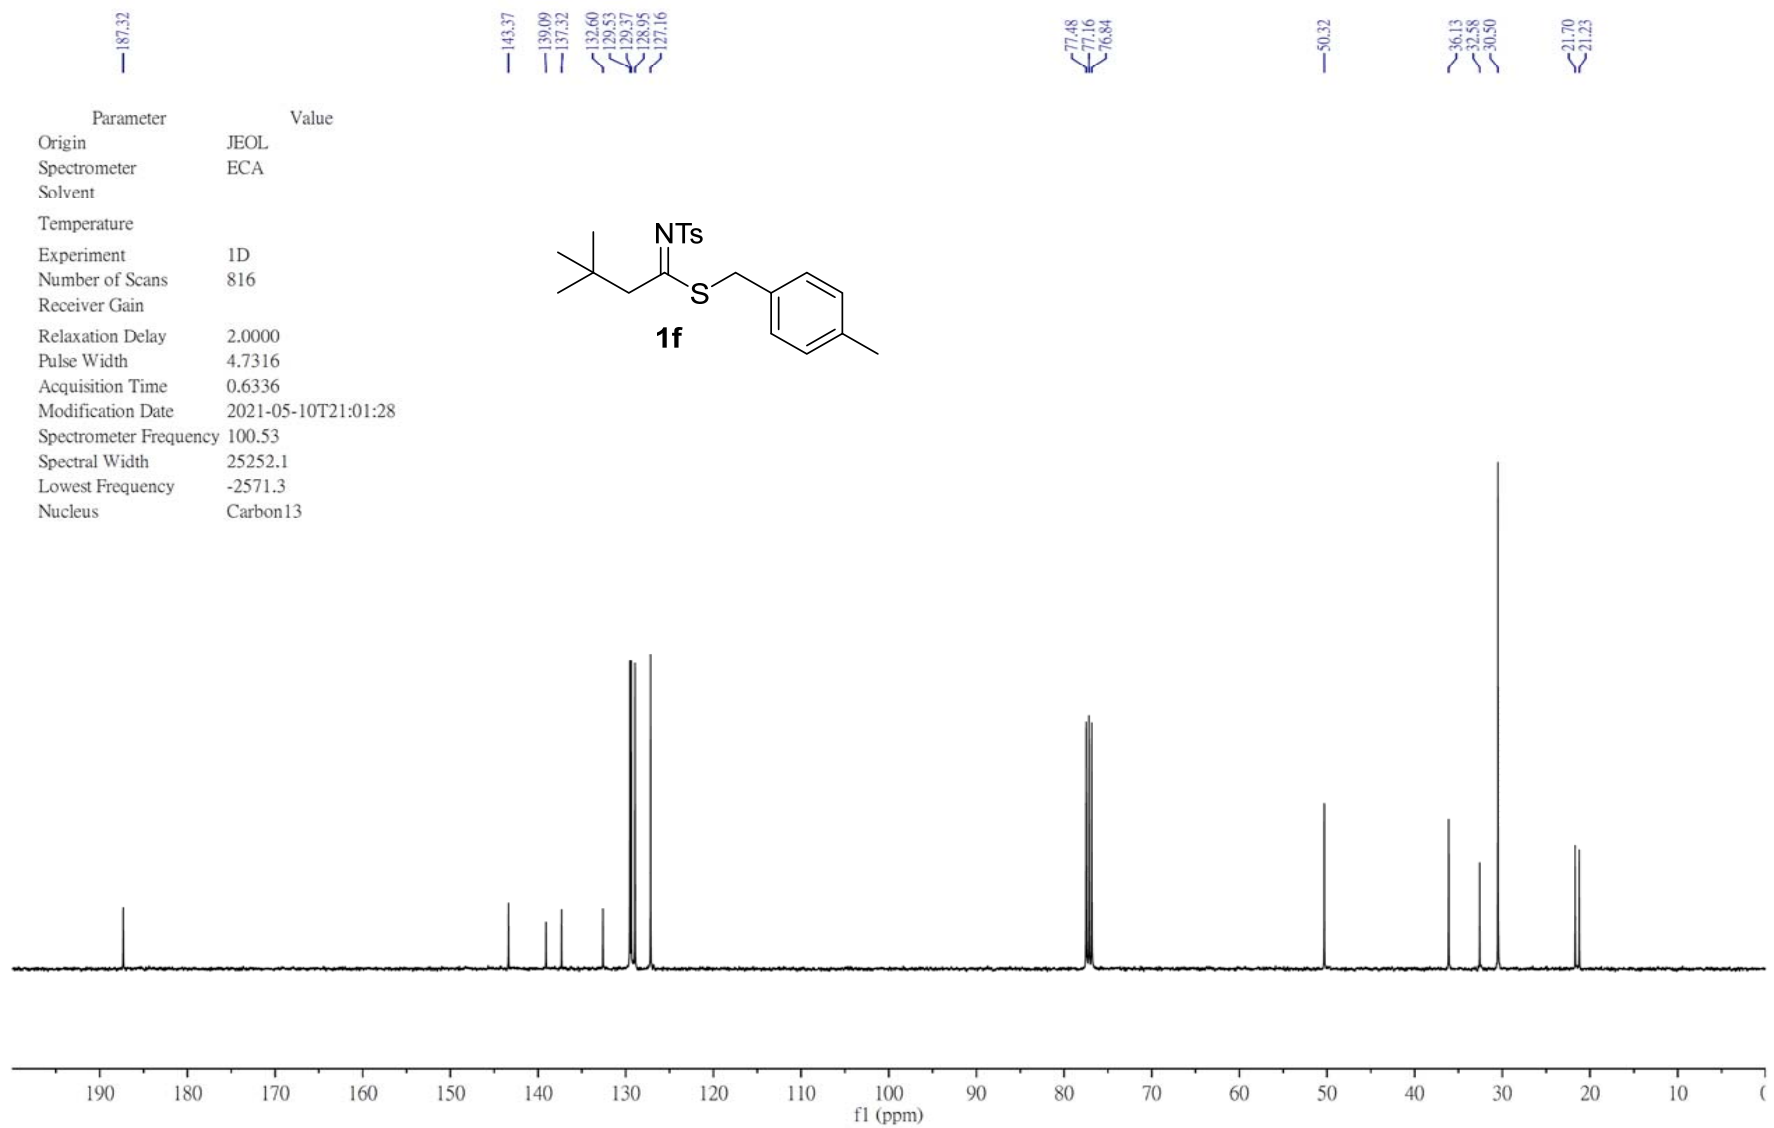

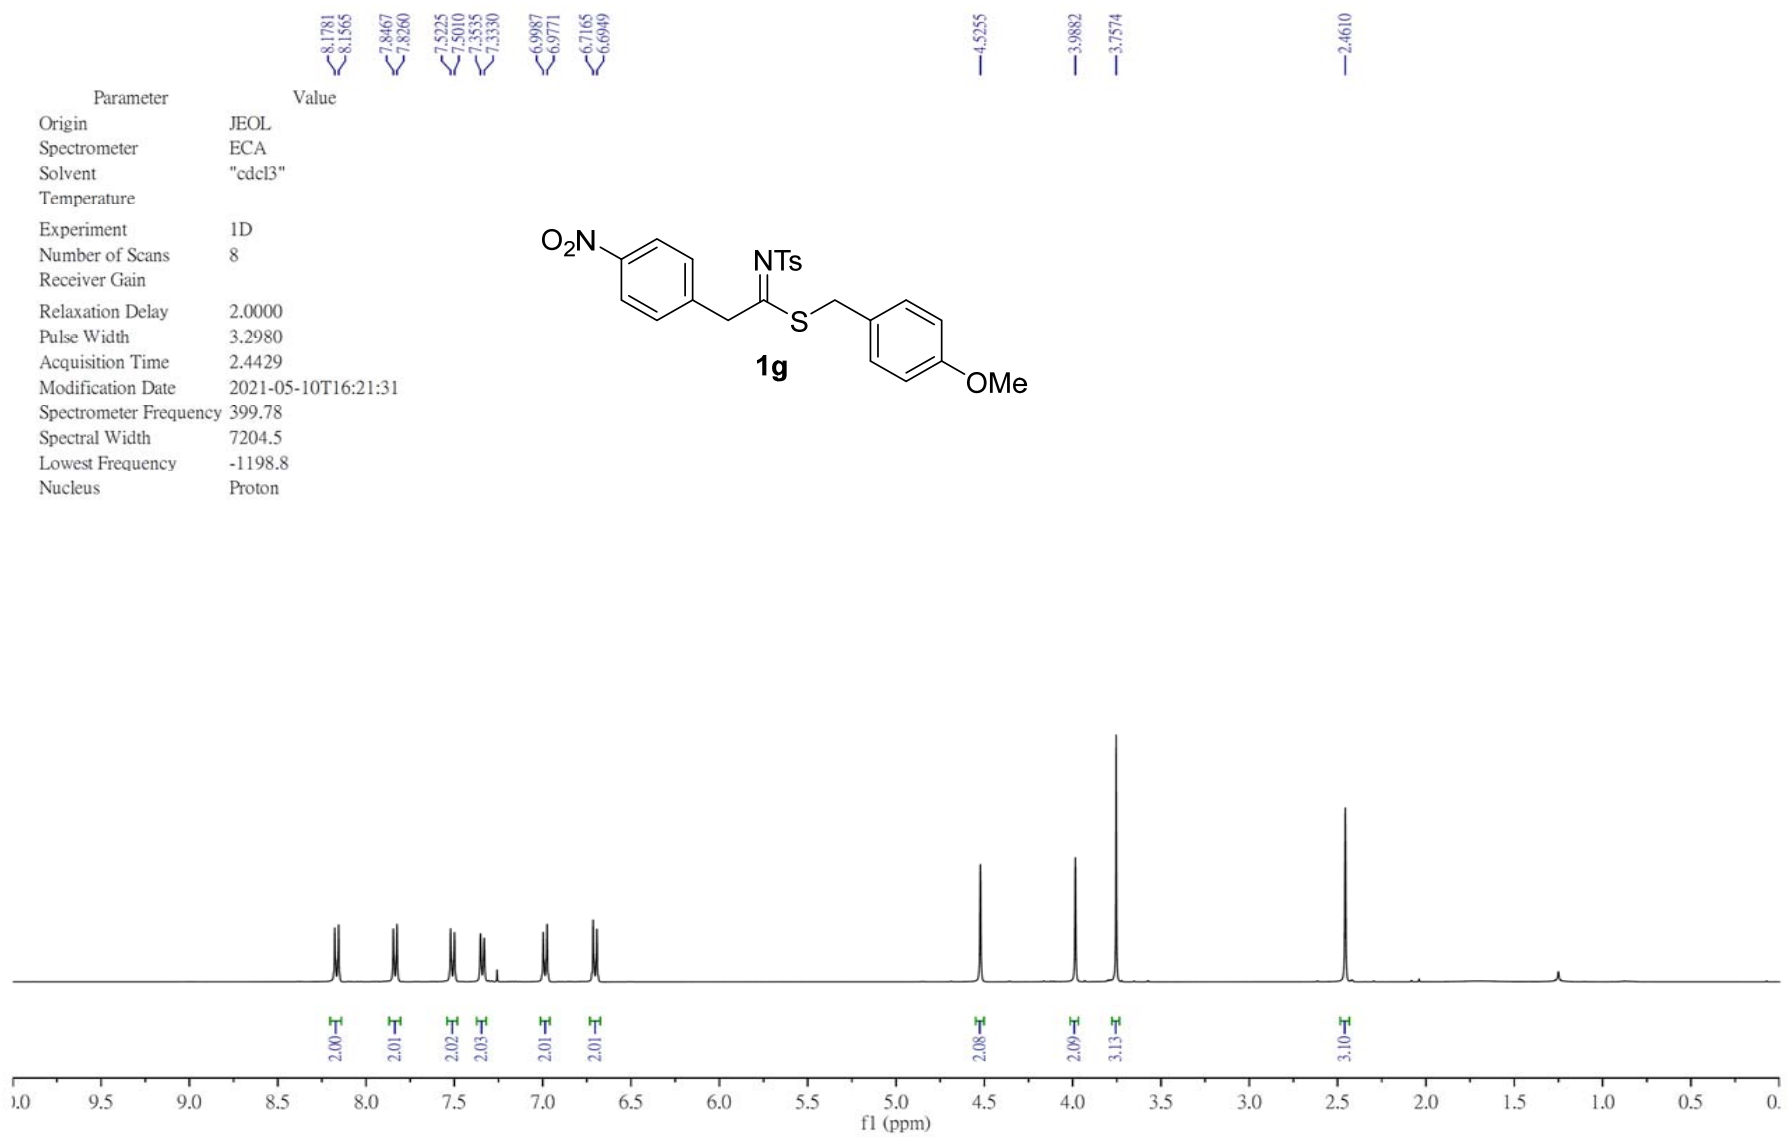

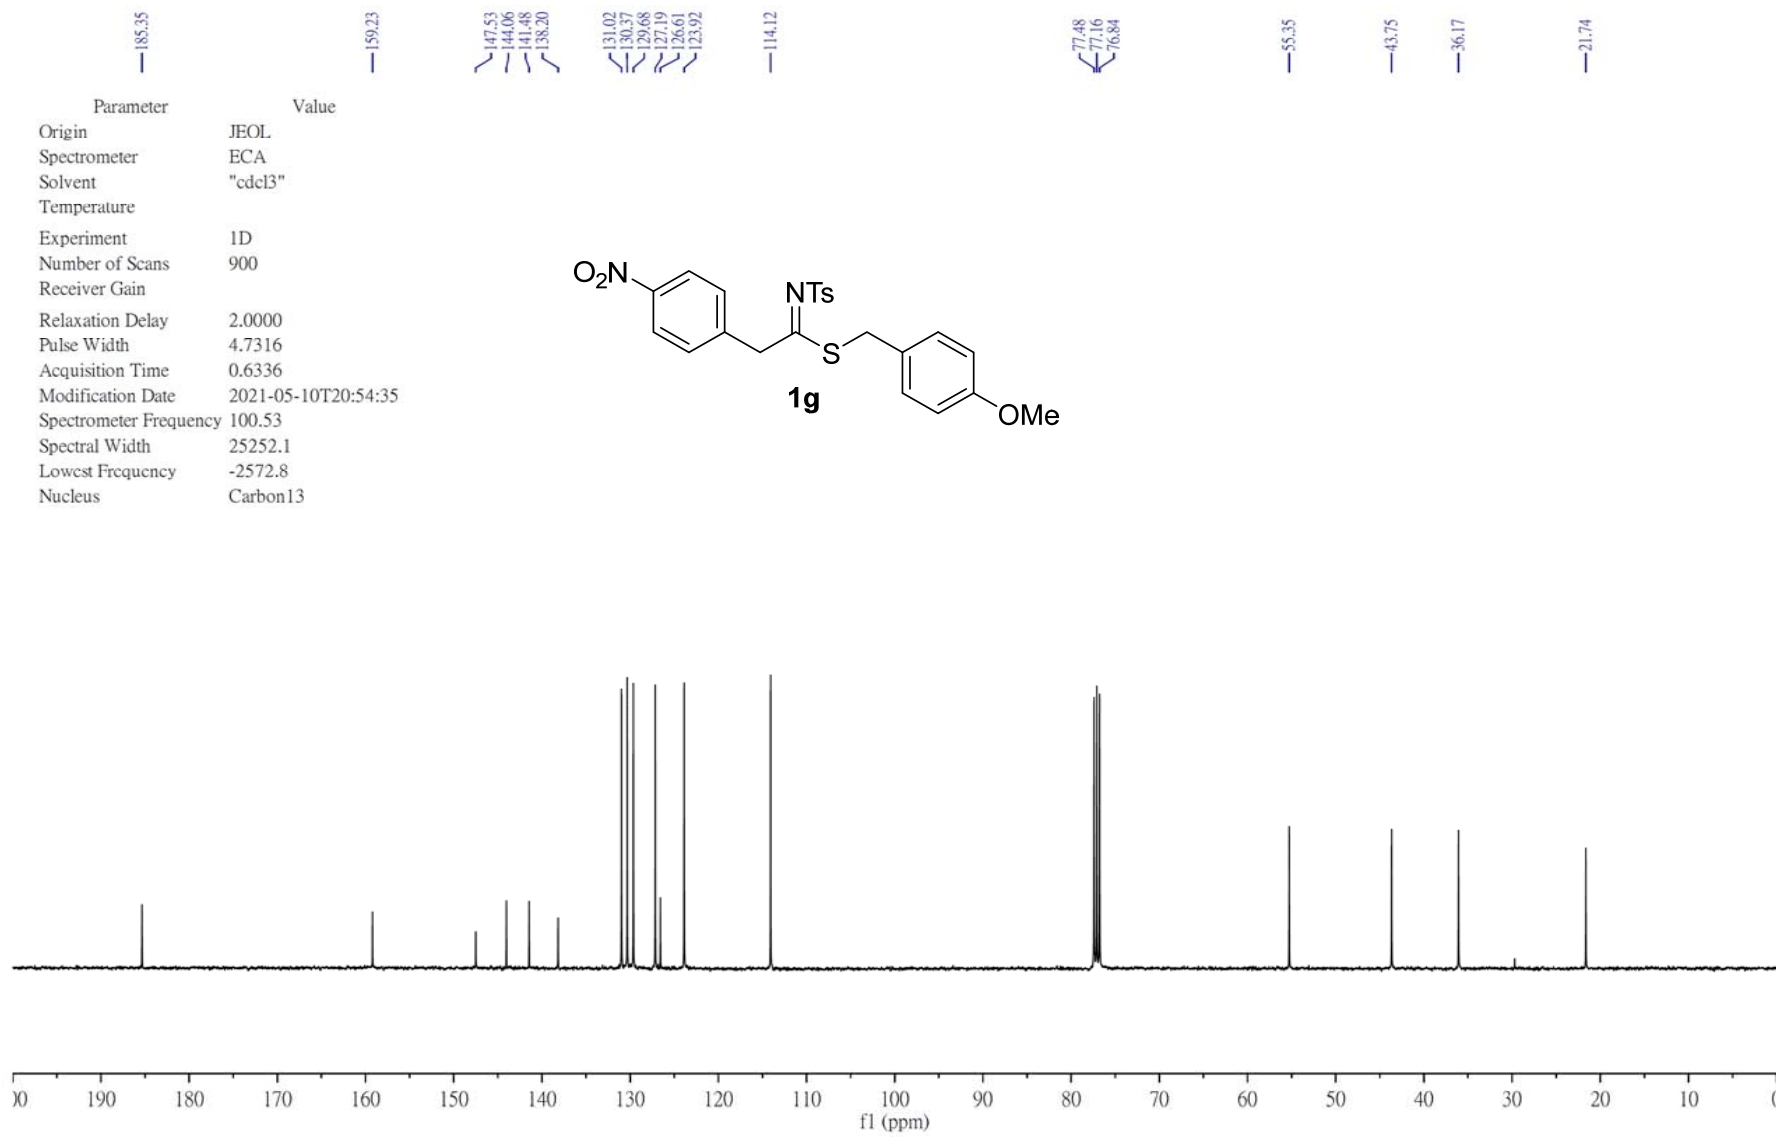

| Parameter              | Value               |
|------------------------|---------------------|
| Origin                 | Varian              |
| Spectrometer           | nmrs                |
| Solvent                | "cdcl3"             |
| Temperature            | 20.0                |
| Pulse Sequence         | s2pul               |
| Experiment             | 1D                  |
| Number of Scans        | 16                  |
| Receiver Gain          | 44                  |
| Relaxation Delay       | 1.0000              |
| Pulse Width            | 0.0000              |
| Acquisition Time       | 2.5559              |
| Modification Date      | 2020-09-24T11:50:00 |
| Spectrometer Frequency | 399.76              |
| Spectral Width         | 6410.3              |
| Lowest Frequency       | -799.6              |
| Nucleus                | 1H                  |

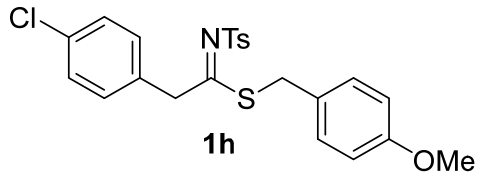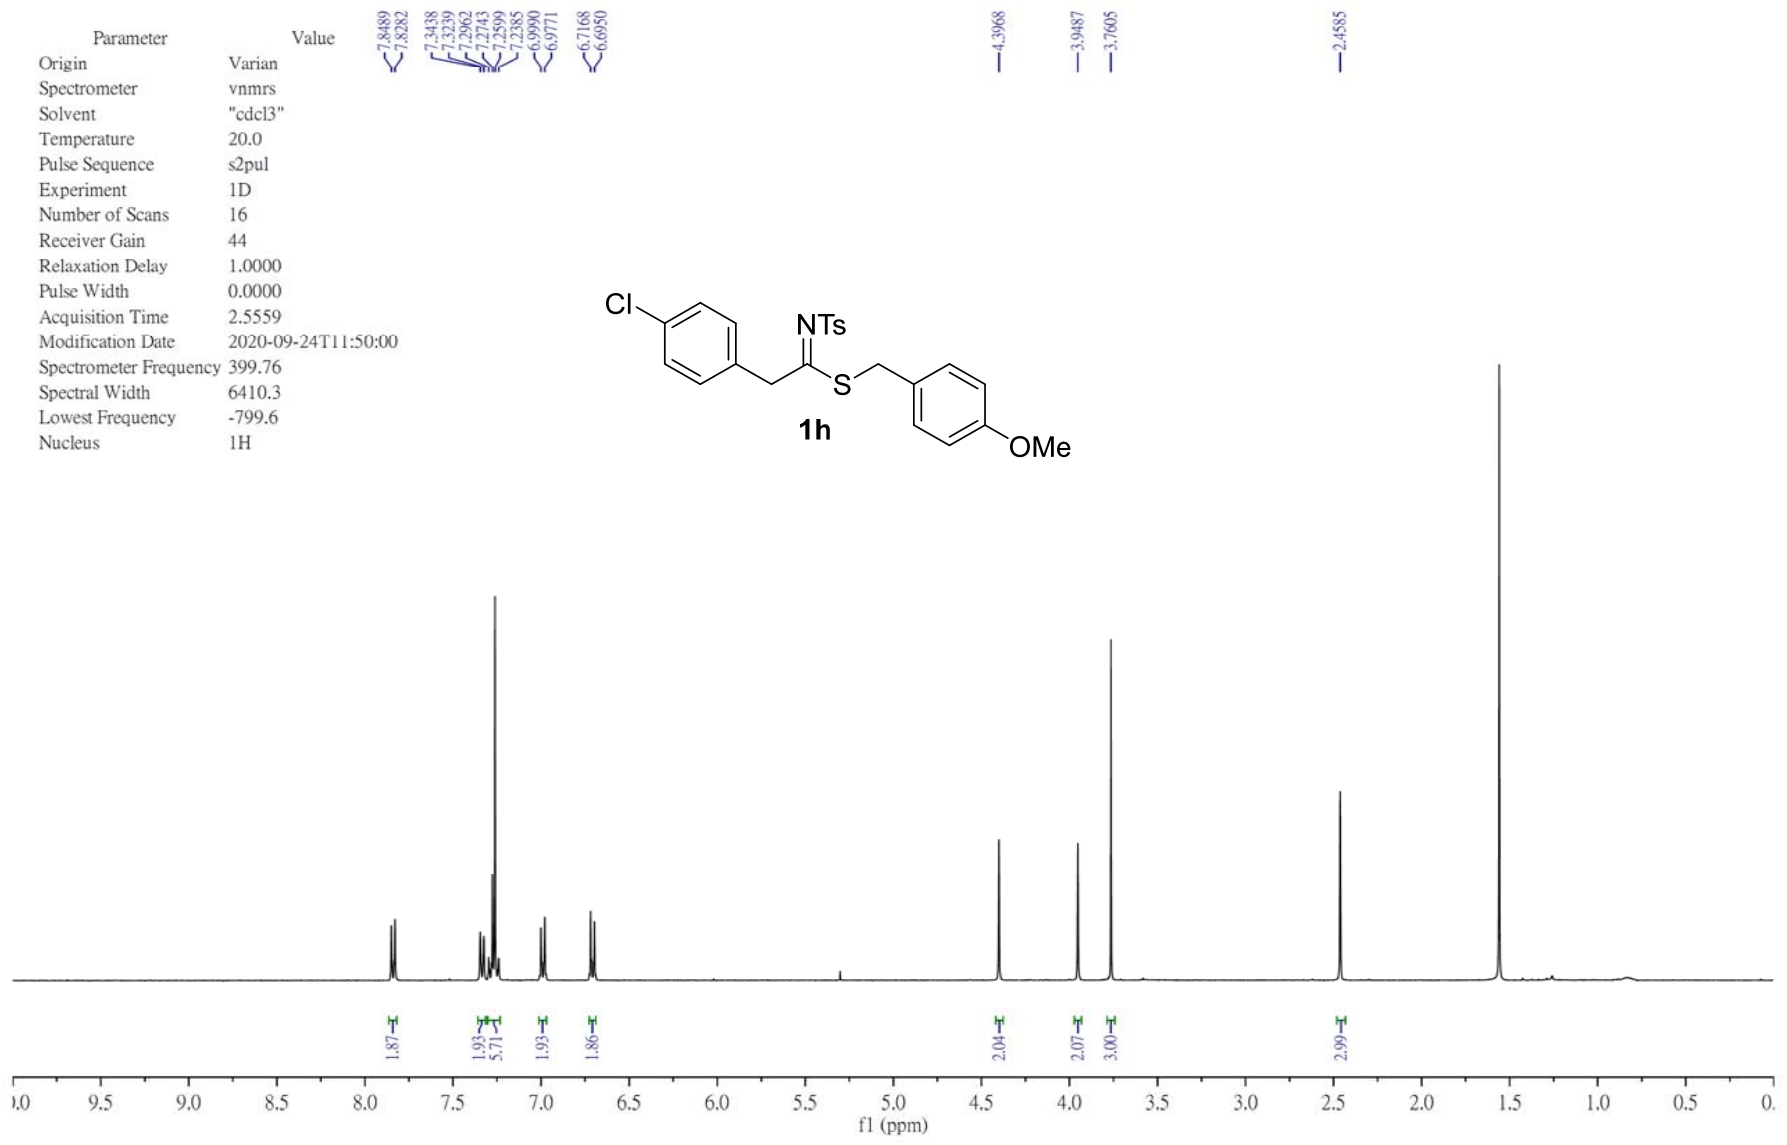

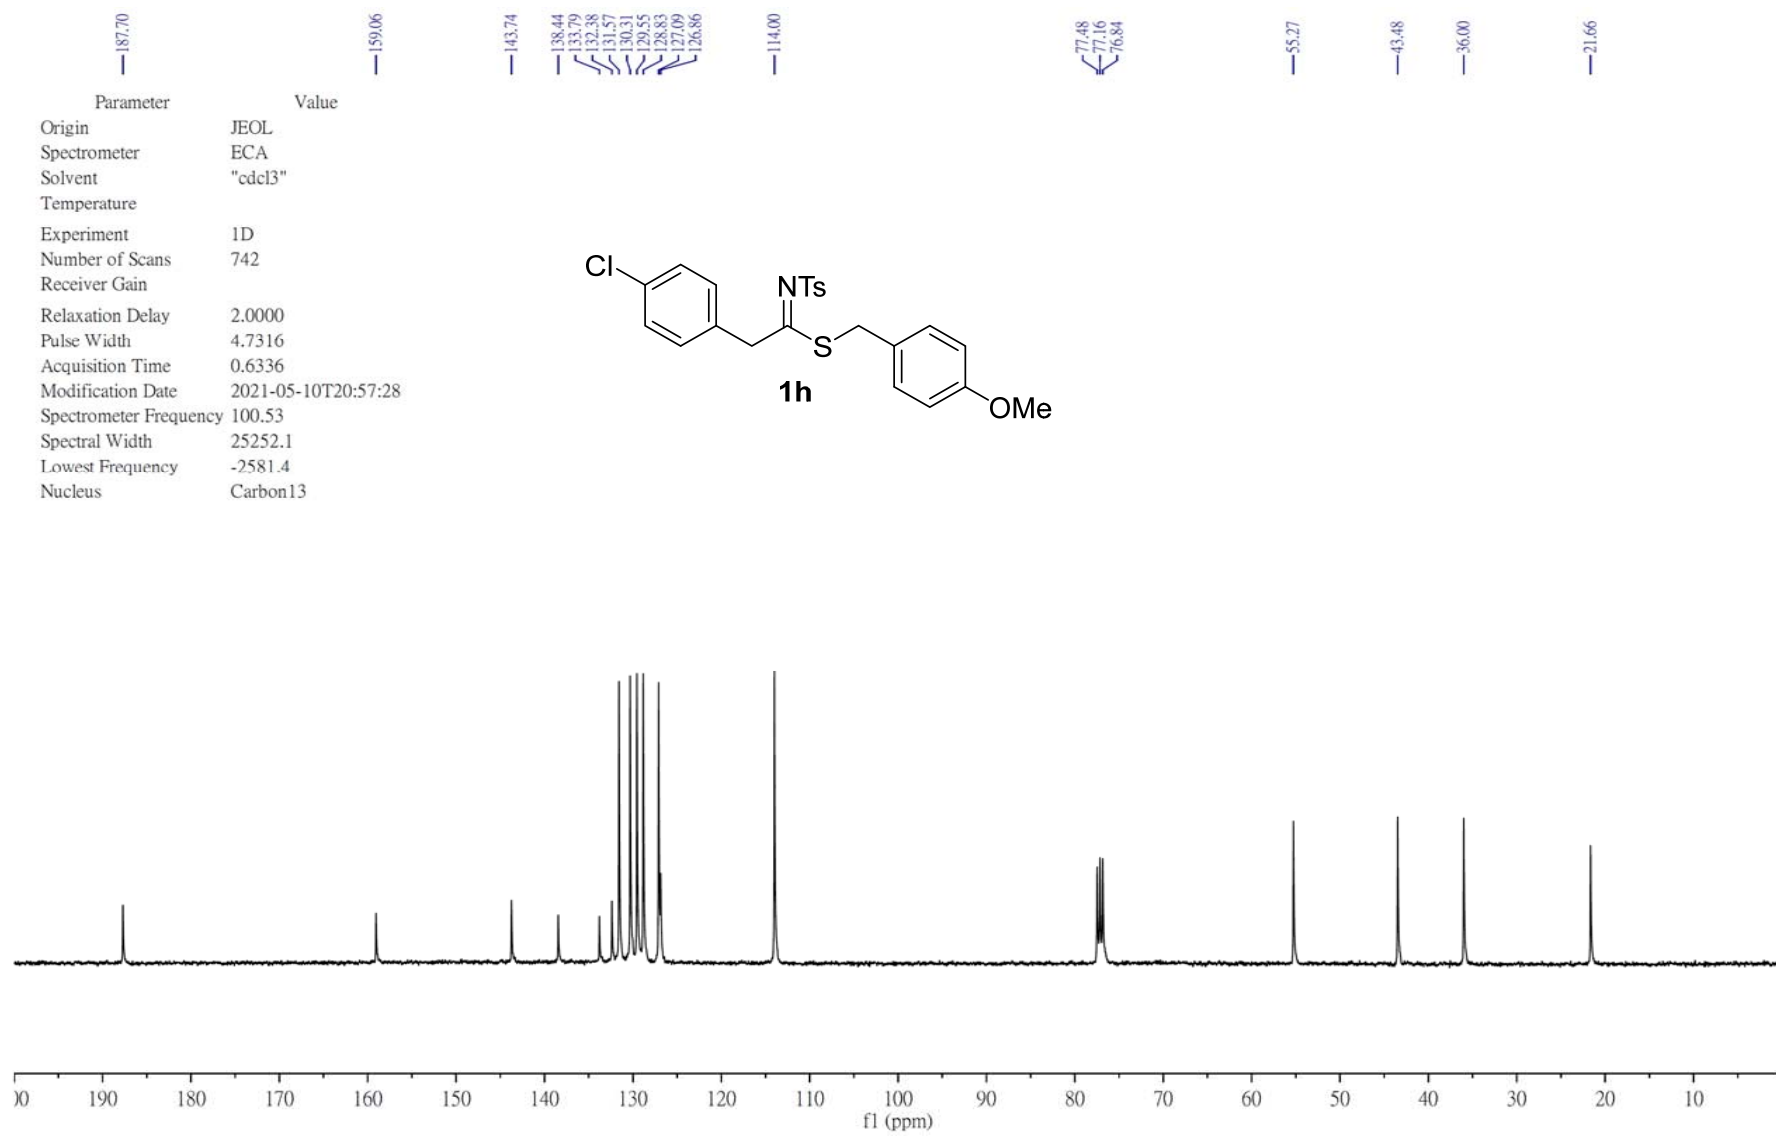



| Parameter              | Value               |
|------------------------|---------------------|
| Origin                 | Varian              |
| Spectrometer           | nmrs                |
| Solvent                | "cdcl3"             |
| Temperature            | 20.0                |
| Pulse Sequence         | s2pul               |
| Experiment             | 1D                  |
| Number of Scans        | 32                  |
| Receiver Gain          | 50                  |
| Relaxation Delay       | 1.0000              |
| Pulse Width            | 0.0000              |
| Acquisition Time       | 2.5559              |
| Modification Date      | 2021-05-10T22:56:00 |
| Spectrometer Frequency | 399.76              |
| Spectral Width         | 6410.3              |
| Lowest Frequency       | -799.4              |
| Nucleus                | 1H                  |

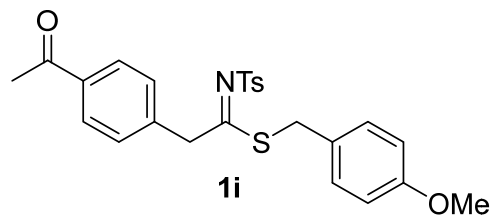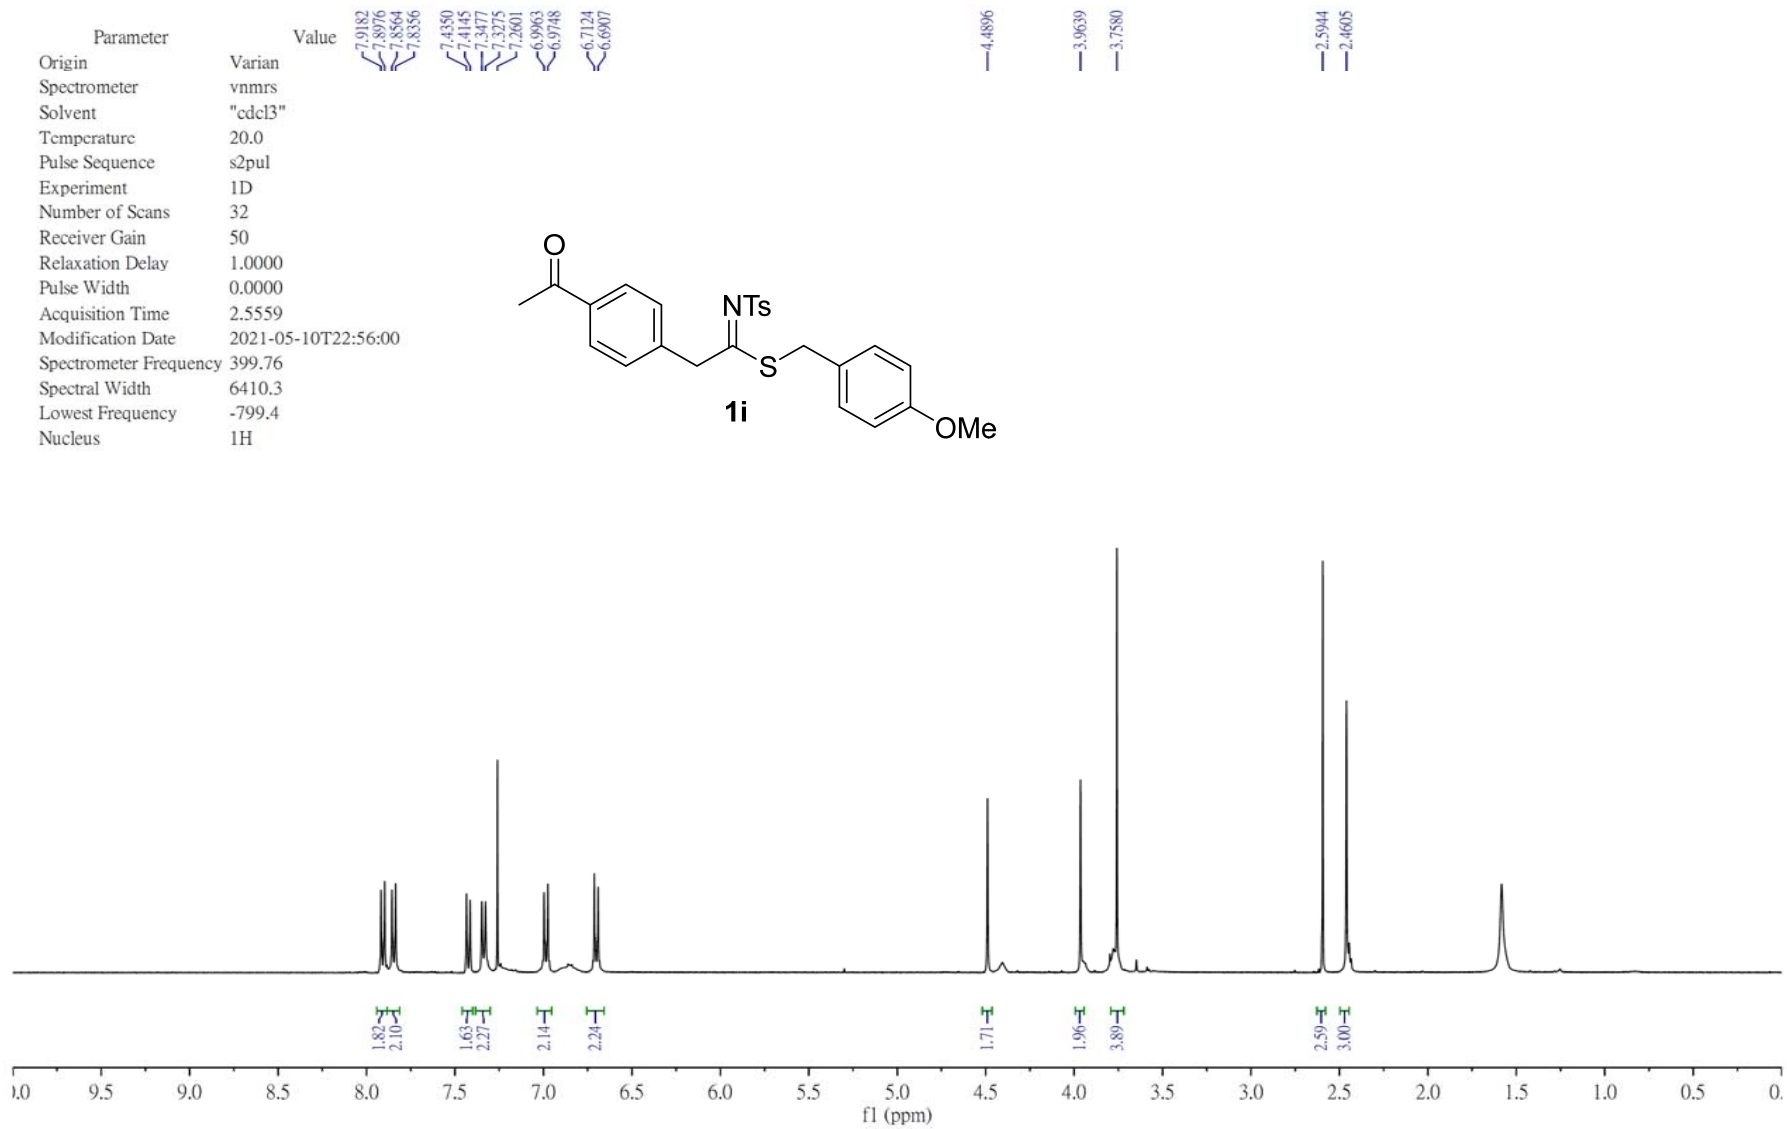

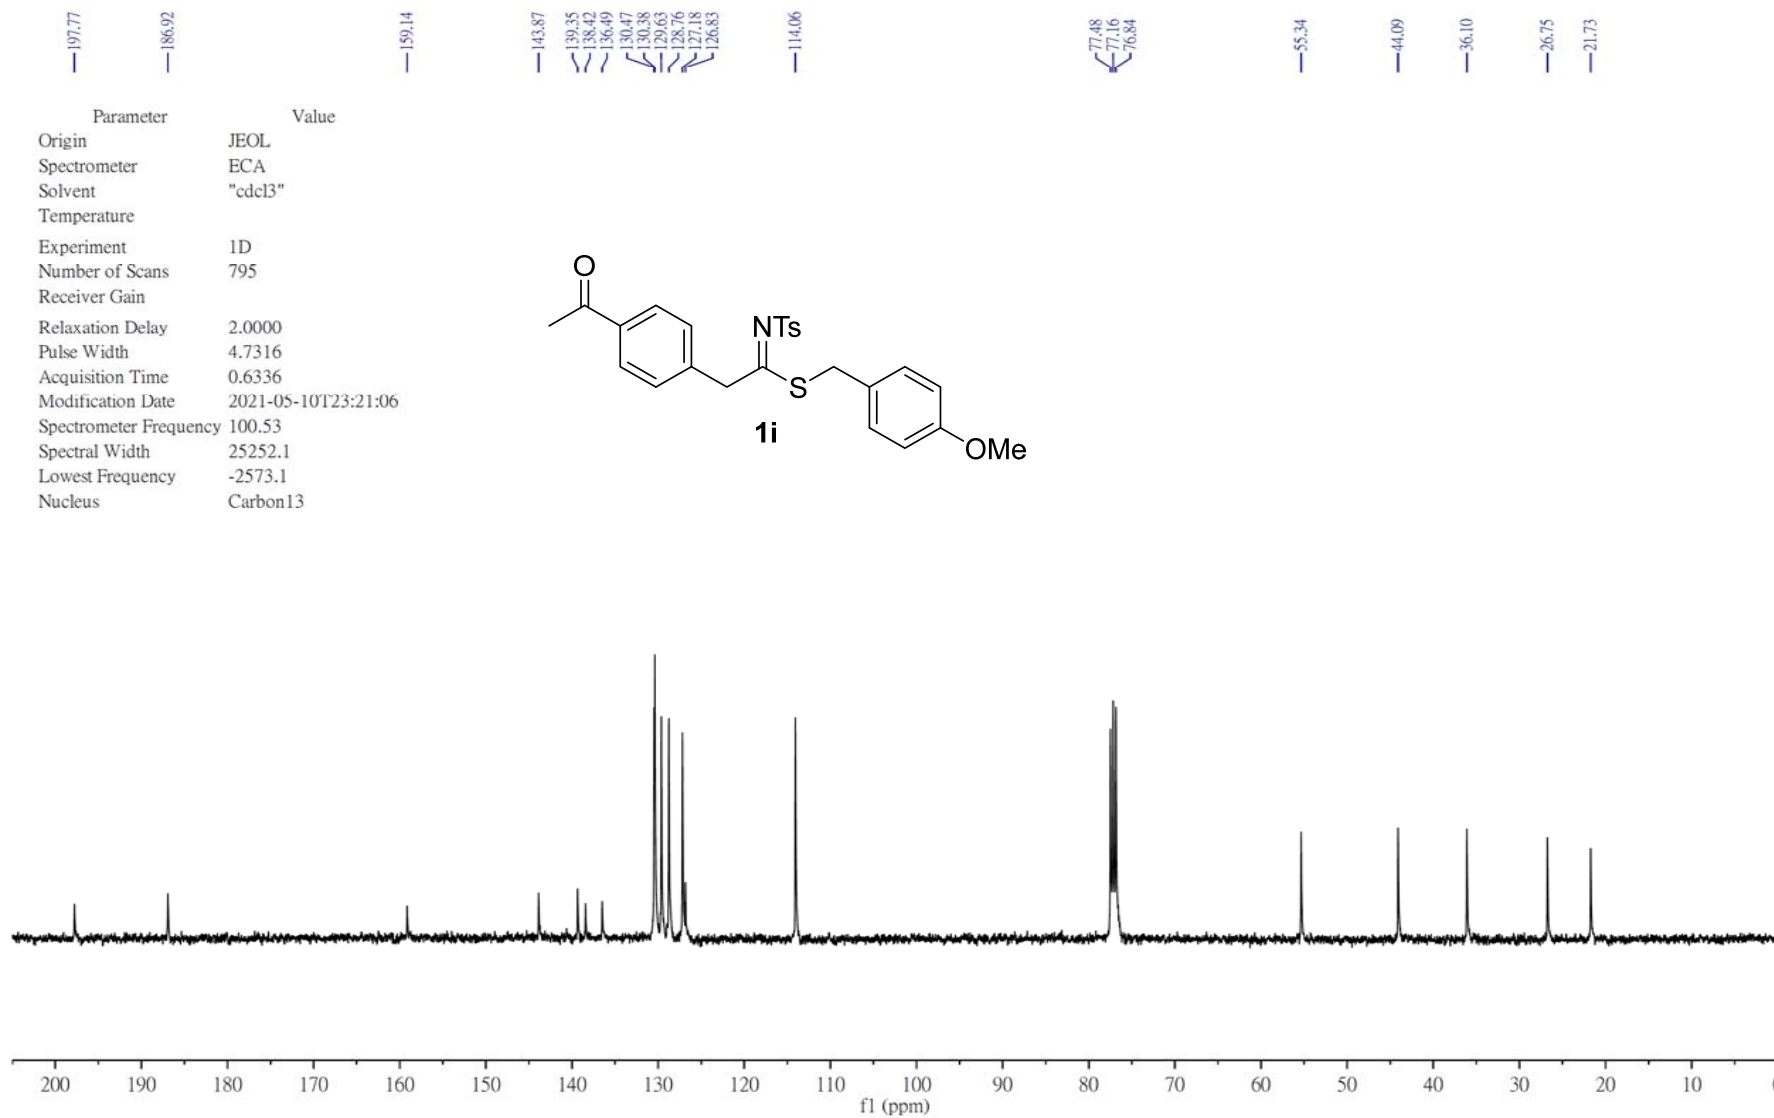

| Parameter              | Value               |
|------------------------|---------------------|
| Origin                 | JEOL                |
| Spectrometer           | ECA                 |
| Solvent                | "cdcl3"             |
| Temperature            |                     |
| Experiment             | 1D                  |
| Number of Scans        | 8                   |
| Receiver Gain          |                     |
| Relaxation Delay       | 2.0000              |
| Pulse Width            | 3.2980              |
| Acquisition Time       | 2.4429              |
| Modification Date      | 2021-05-10T16:25:37 |
| Spectrometer Frequency | 399.78              |
| Spectral Width         | 7204.5              |
| Lowest Frequency       | -1188.8             |
| Nucleus                | Proton              |

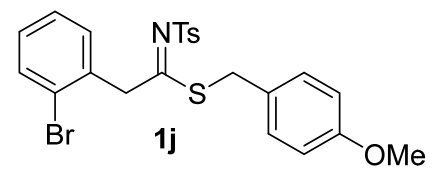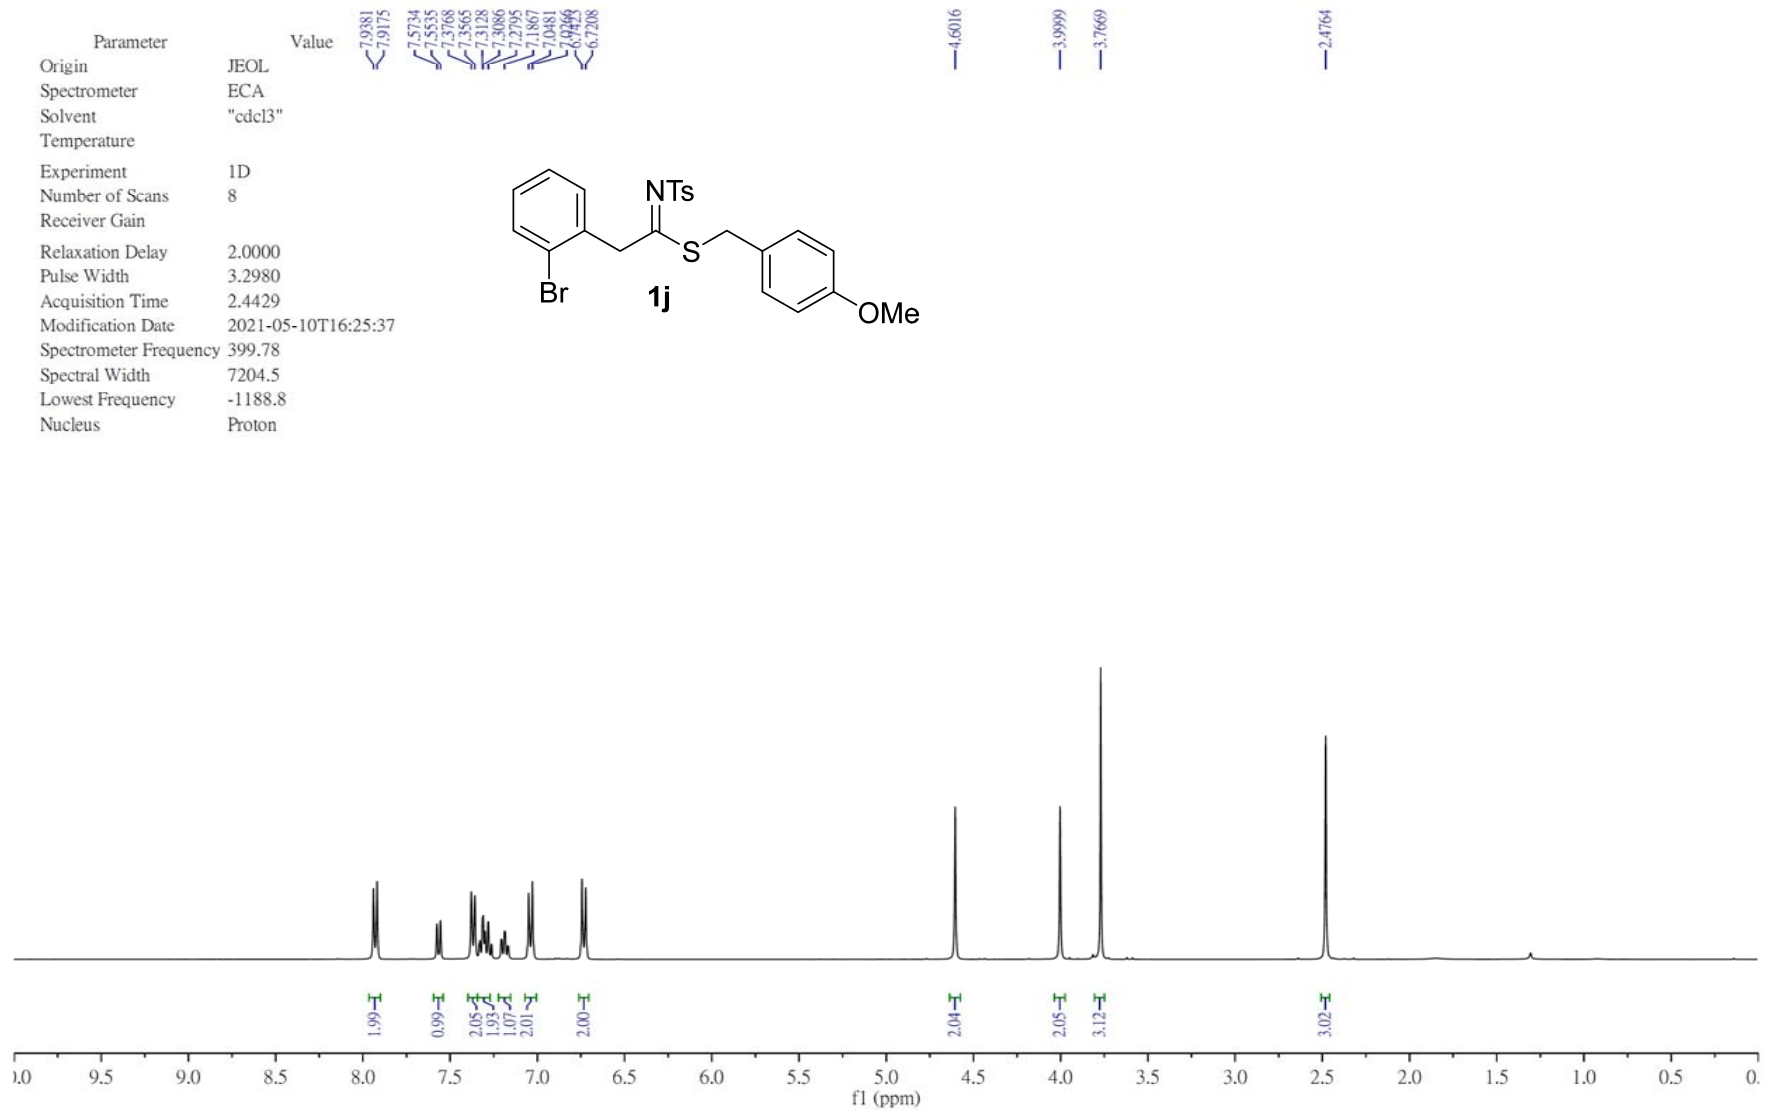

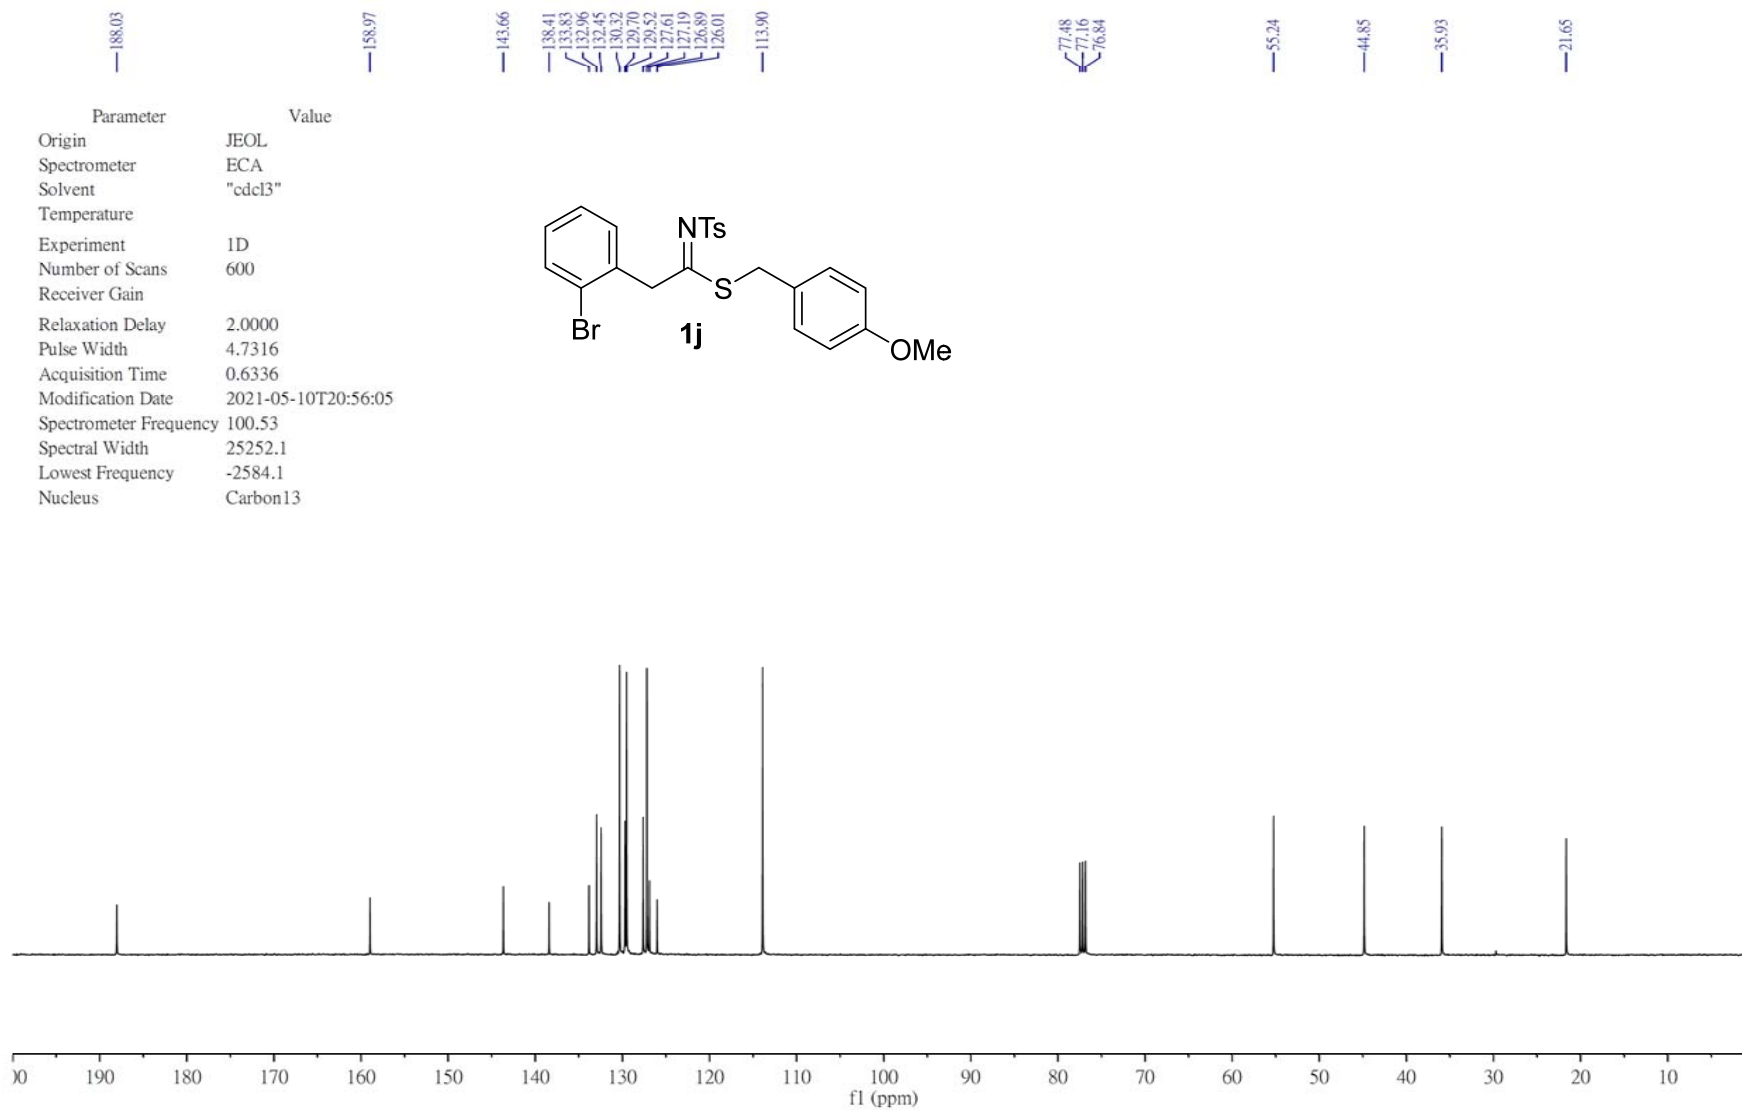

| Parameter              | Value               |
|------------------------|---------------------|
| Origin                 | JEOL                |
| Spectrometer           | ECA                 |
| Solvent                | "cdcl3"             |
| Temperature            |                     |
| Experiment             | 1D                  |
| Number of Scans        | 8                   |
| Receiver Gain          |                     |
| Relaxation Delay       | 2.0000              |
| Pulse Width            | 3.2980              |
| Acquisition Time       | 2.4429              |
| Modification Date      | 2021-05-10T16:51:00 |
| Spectrometer Frequency | 399.78              |
| Spectral Width         | 7204.5              |
| Lowest Frequency       | -1198.4             |
| Nucleus                | Proton              |

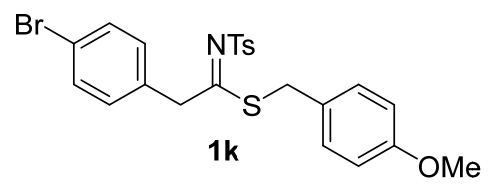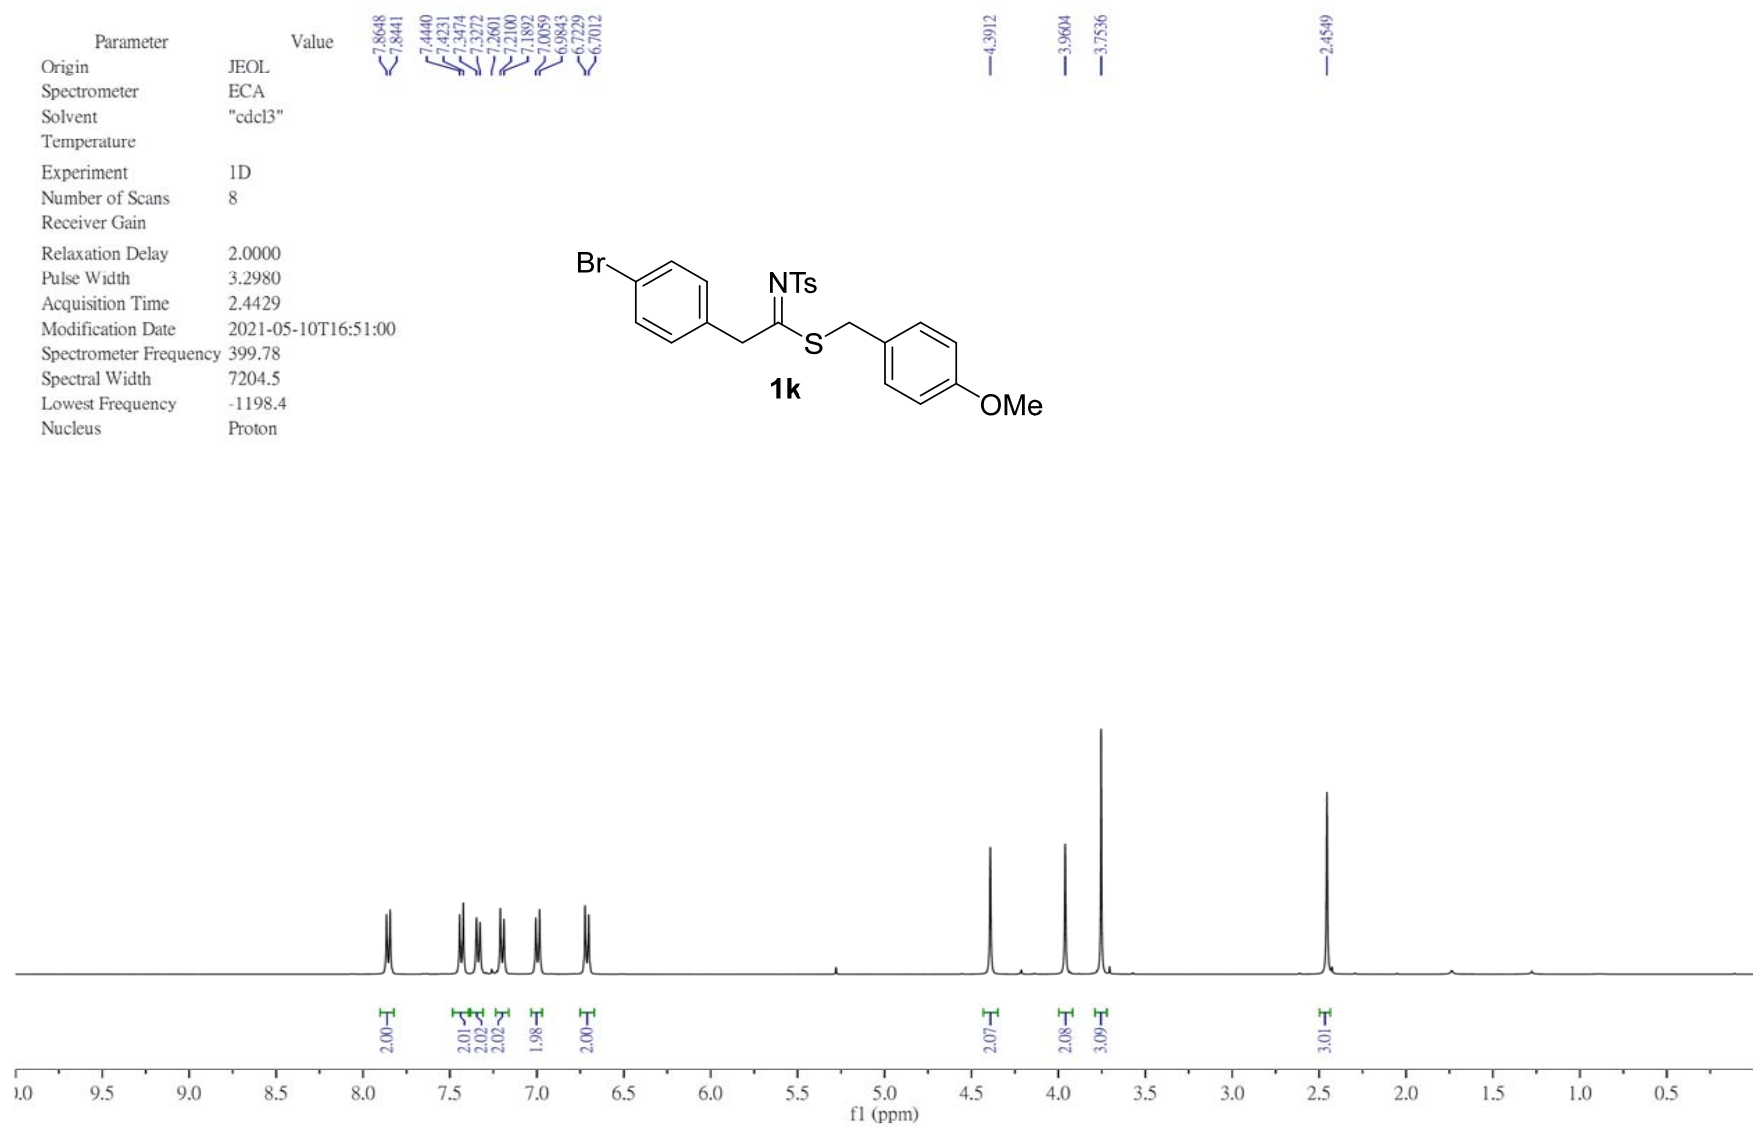

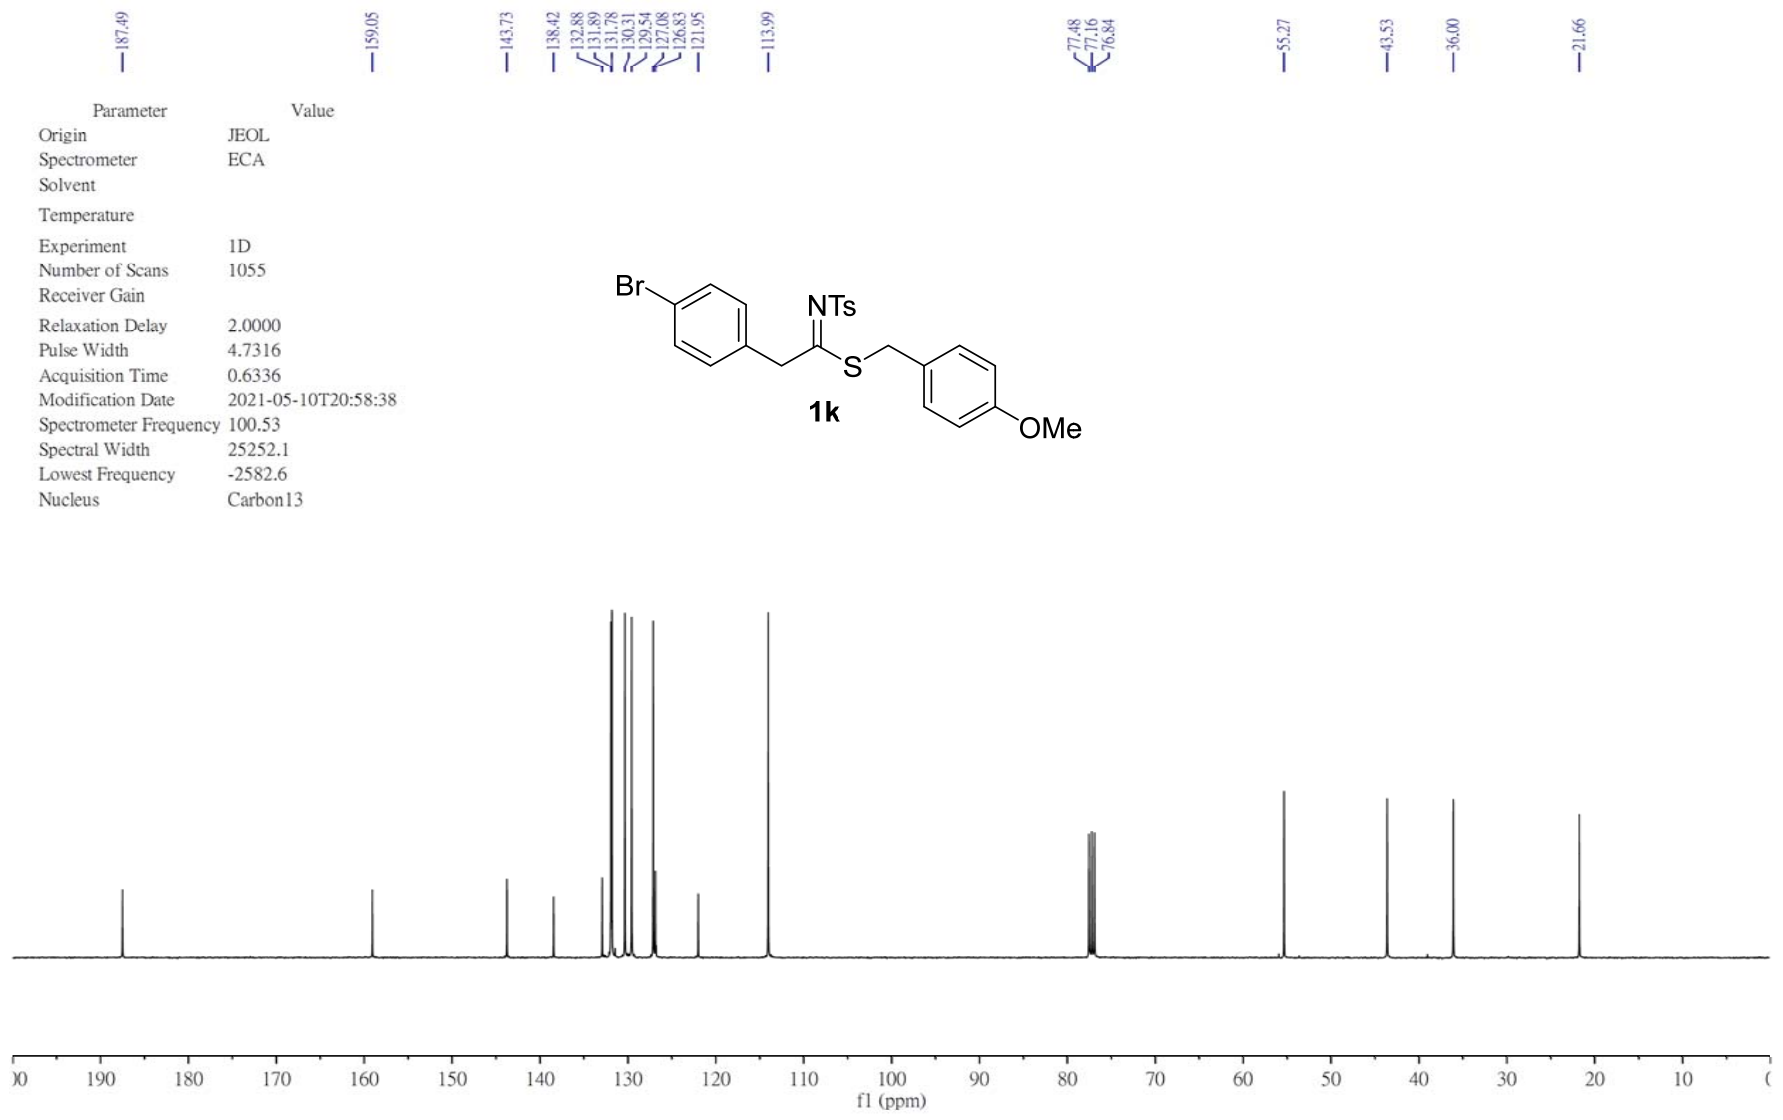

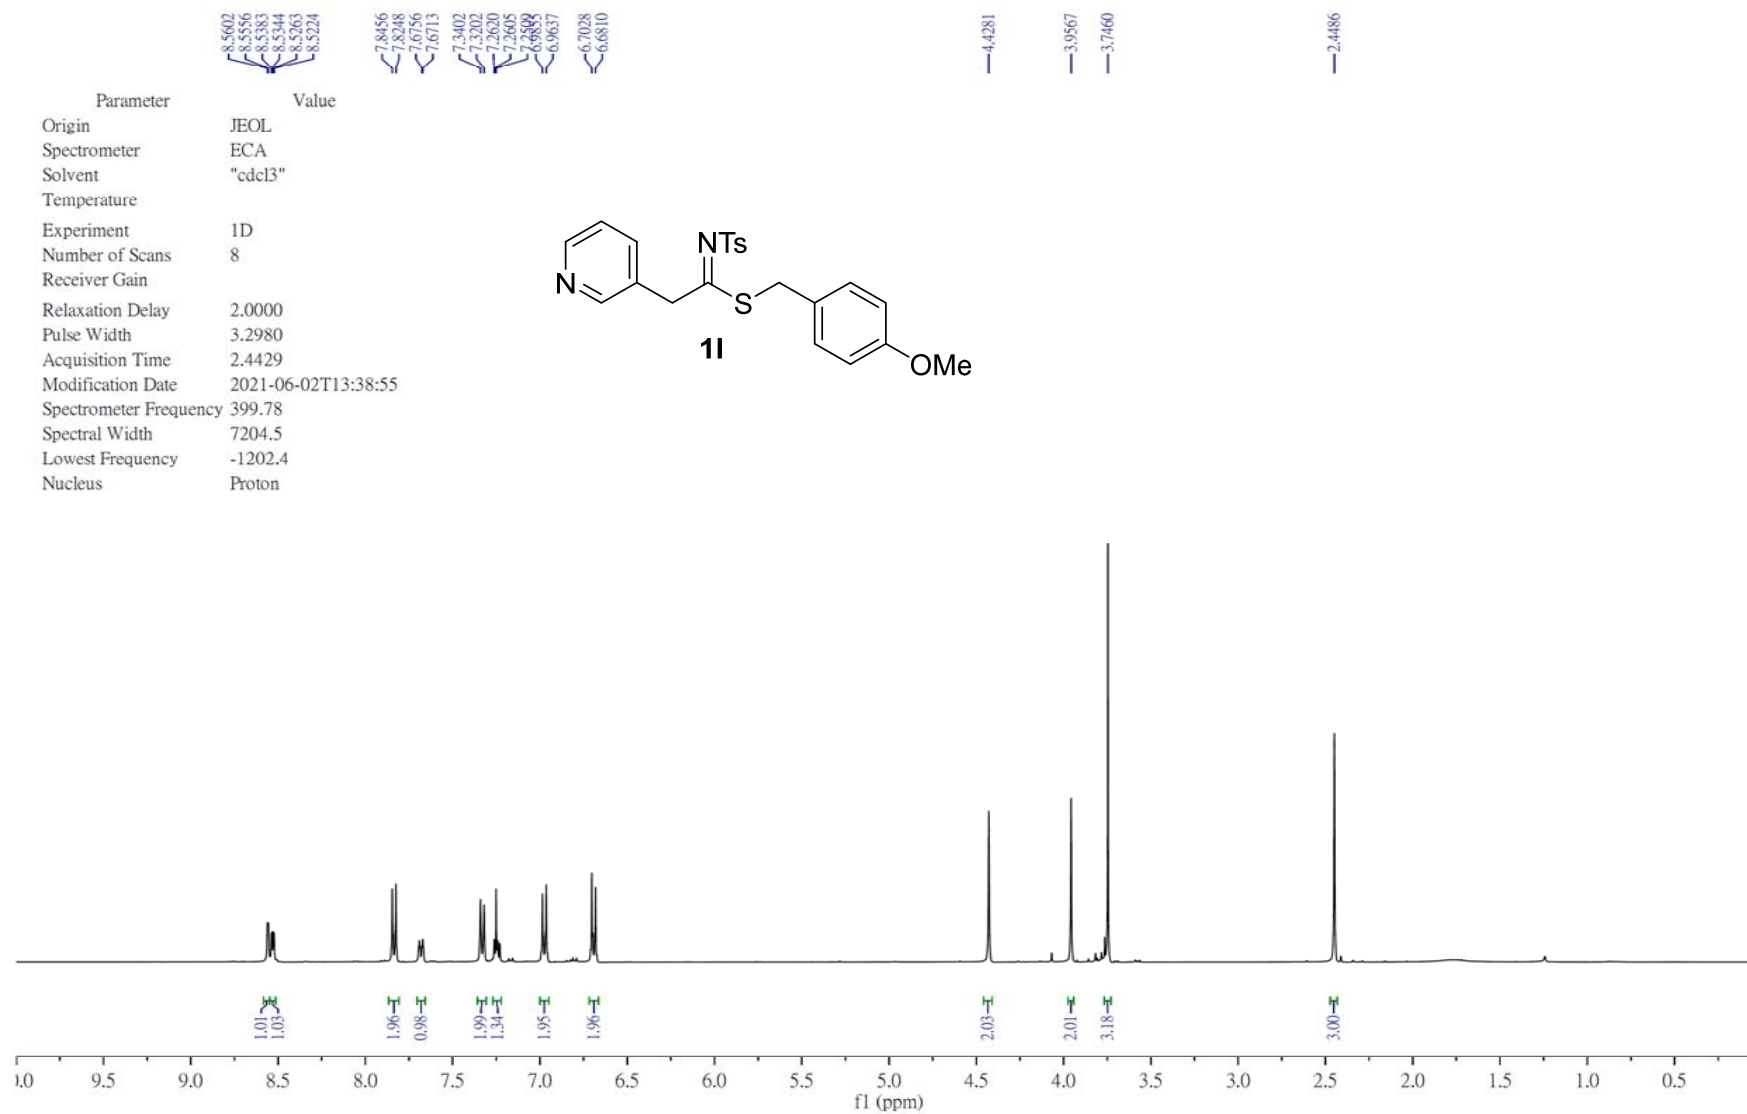

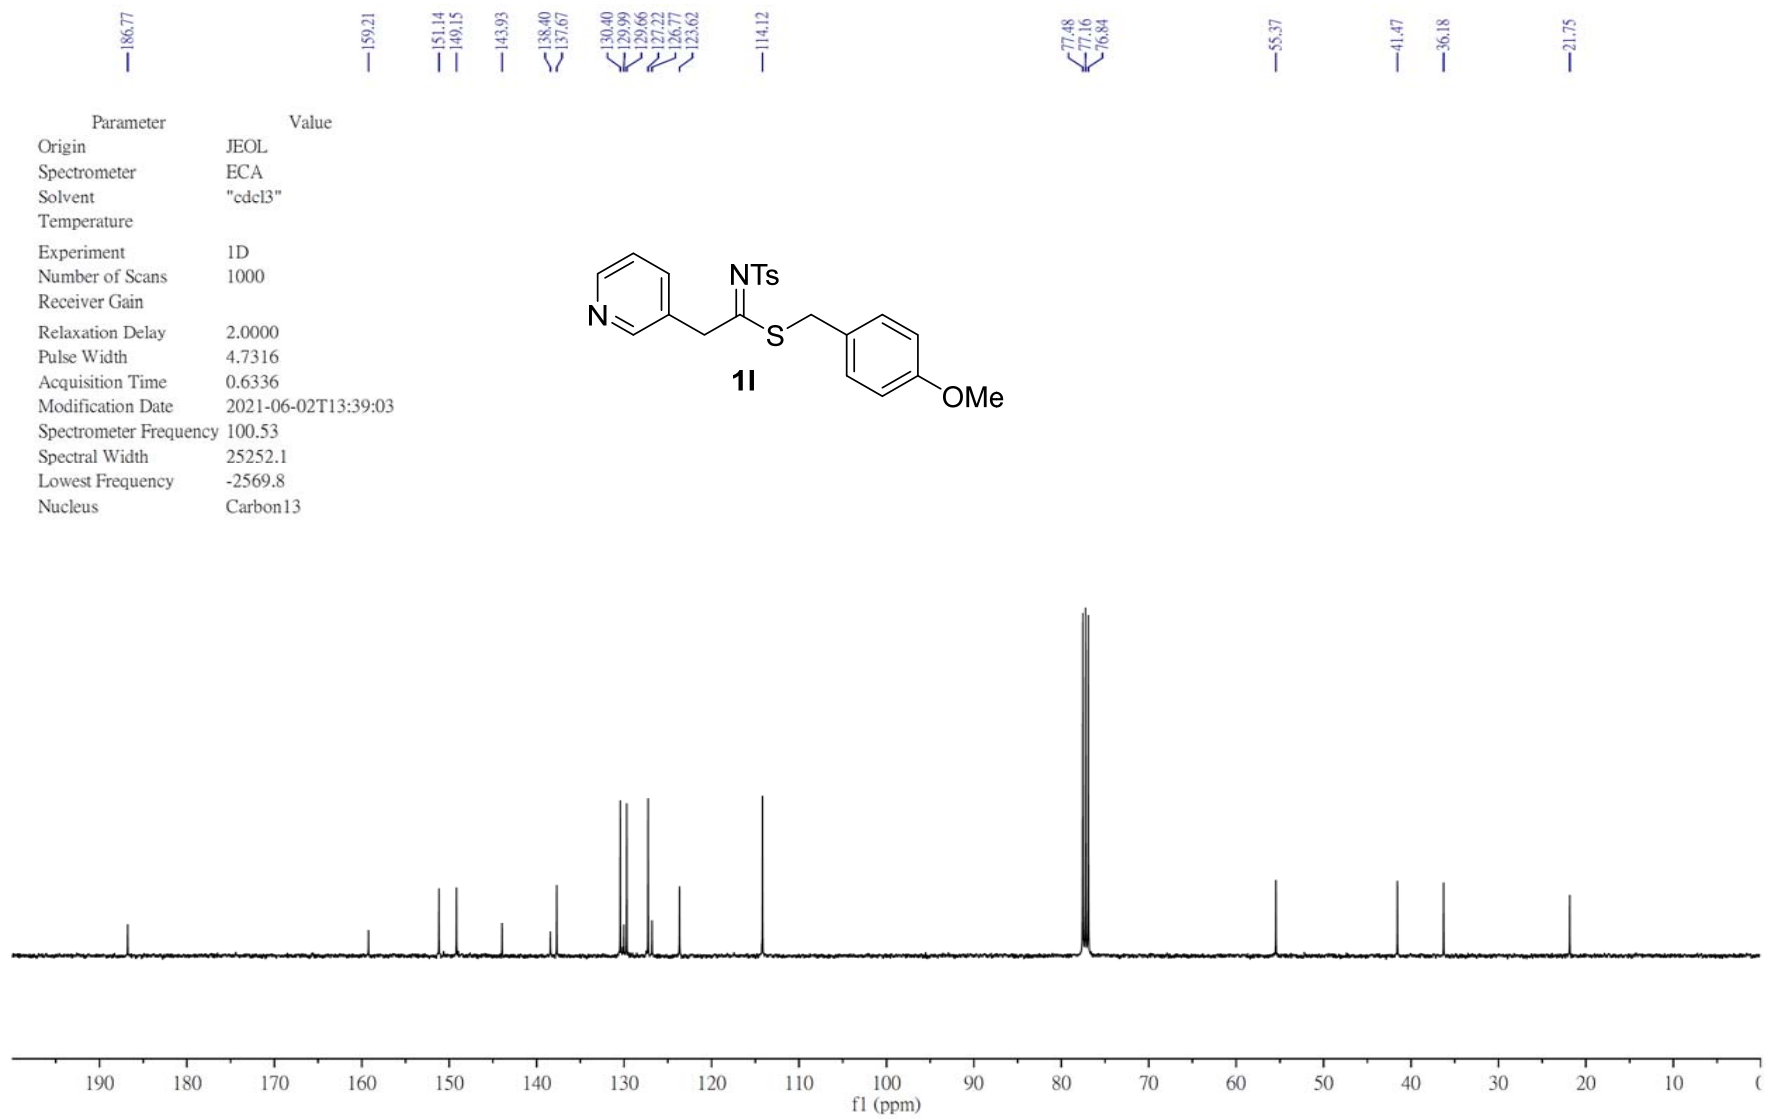



10.6774

7.5928  
7.5748  
7.4189  
7.4143  
7.4050  
7.3437  
7.3235  
7.2562  
7.2388  
7.2256  
7.2065  
7.1919  
6.9869  
6.9668

6.1474

5.6080

2.5001

2.1903

| Parameter              | Value               |
|------------------------|---------------------|
| Origin                 | JEOL                |
| Spectrometer           | ECA                 |
| Solvent                | DMSO                |
| Temperature            |                     |
| Experiment             | 1D                  |
| Number of Scans        | 8                   |
| Receiver Gain          |                     |
| Relaxation Delay       | 2.0000              |
| Pulse Width            | 3.2980              |
| Acquisition Time       | 2.4429              |
| Modification Date      | 2021-05-10T17:08:20 |
| Spectrometer Frequency | 399.78              |
| Spectral Width         | 7204.5              |
| Lowest Frequency       | -1188.0             |
| Nucleus                | Proton              |

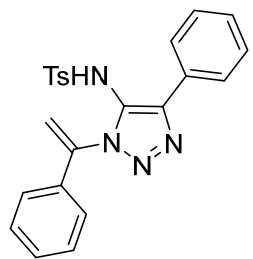

3aa

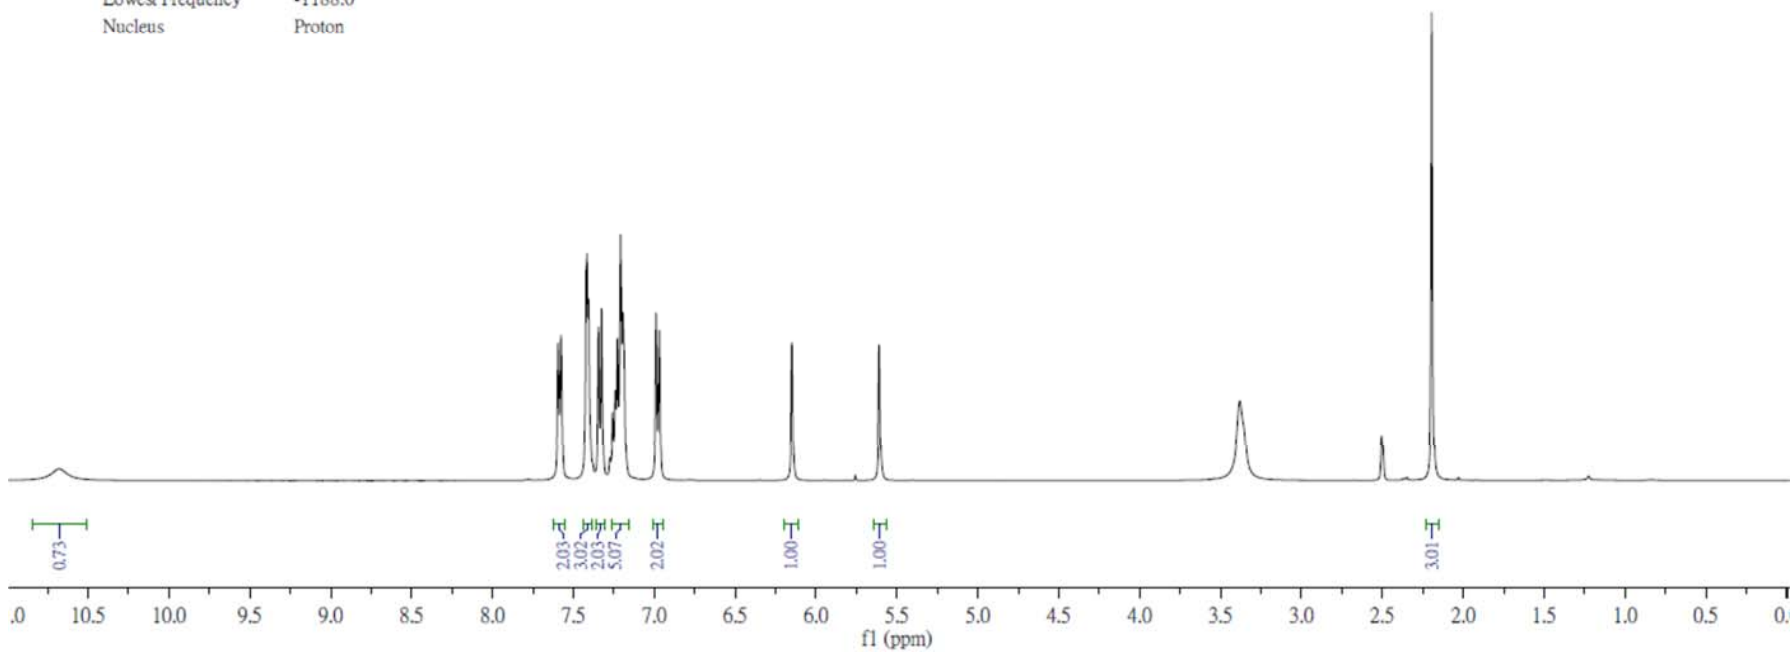

143.38  
141.50  
140.07  
137.17  
134.73  
129.34  
129.28  
128.57  
128.24  
128.13  
127.76  
126.45  
126.15  
125.86

40.15  
39.94  
39.73  
39.52  
39.31  
39.10  
38.89

20.91

| Parameter              | Value               |
|------------------------|---------------------|
| Origin                 | JEOL                |
| Spectrometer           | ECA                 |
| Solvent                | DMSO                |
| Temperature            |                     |
| Experiment             | 1D                  |
| Number of Scans        | 819                 |
| Receiver Gain          |                     |
| Relaxation Delay       | 2.0000              |
| Pulse Width            | 4.7316              |
| Acquisition Time       | 0.6336              |
| Modification Date      | 2021-04-26T15:10:20 |
| Spectrometer Frequency | 100.53              |
| Spectral Width         | 25252.1             |
| Lowest Frequency       | -2624.4             |
| Nucleus                | Carbon13            |

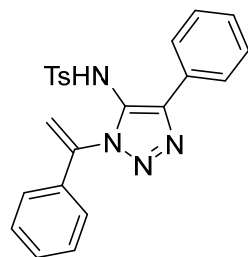

**3aa**

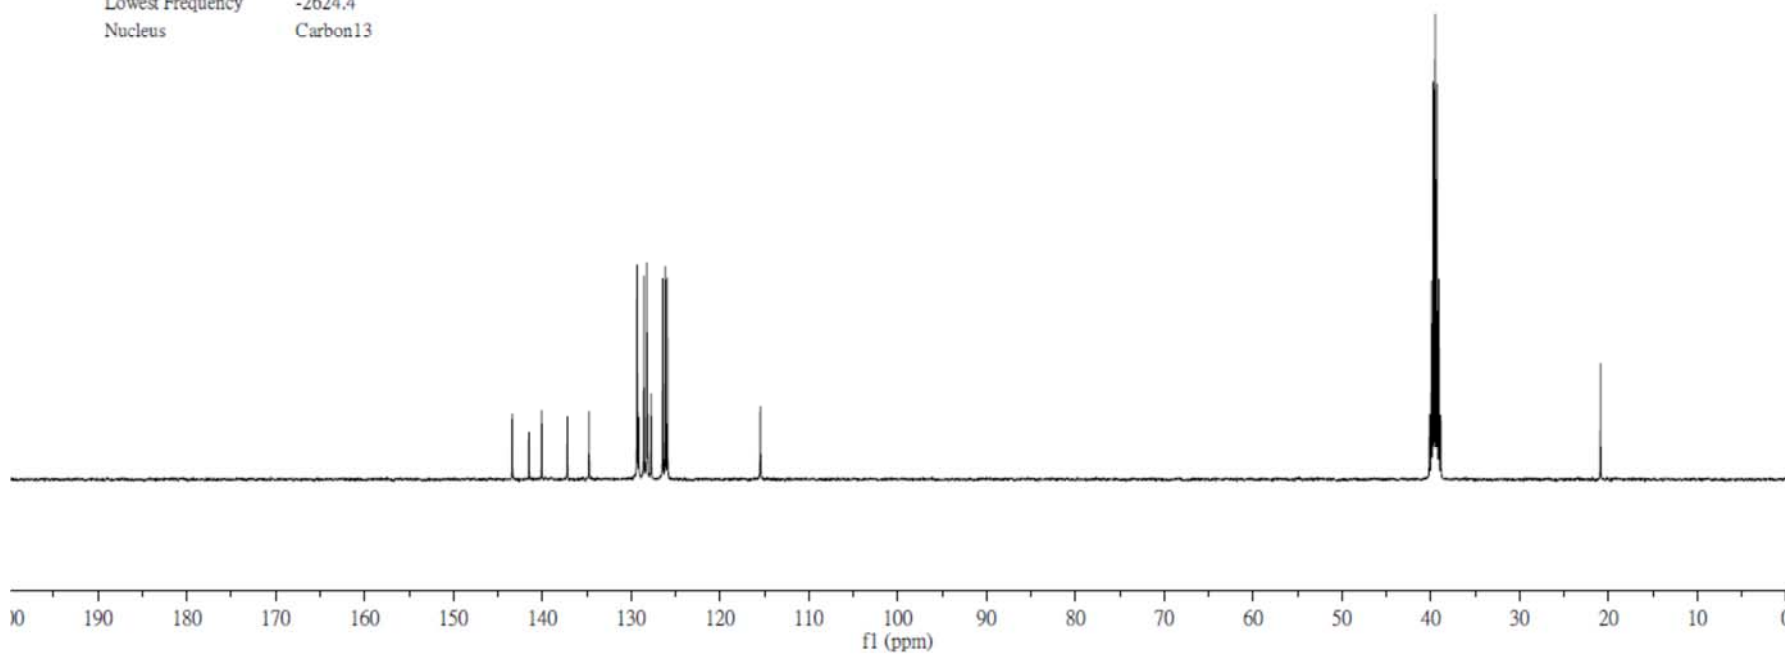

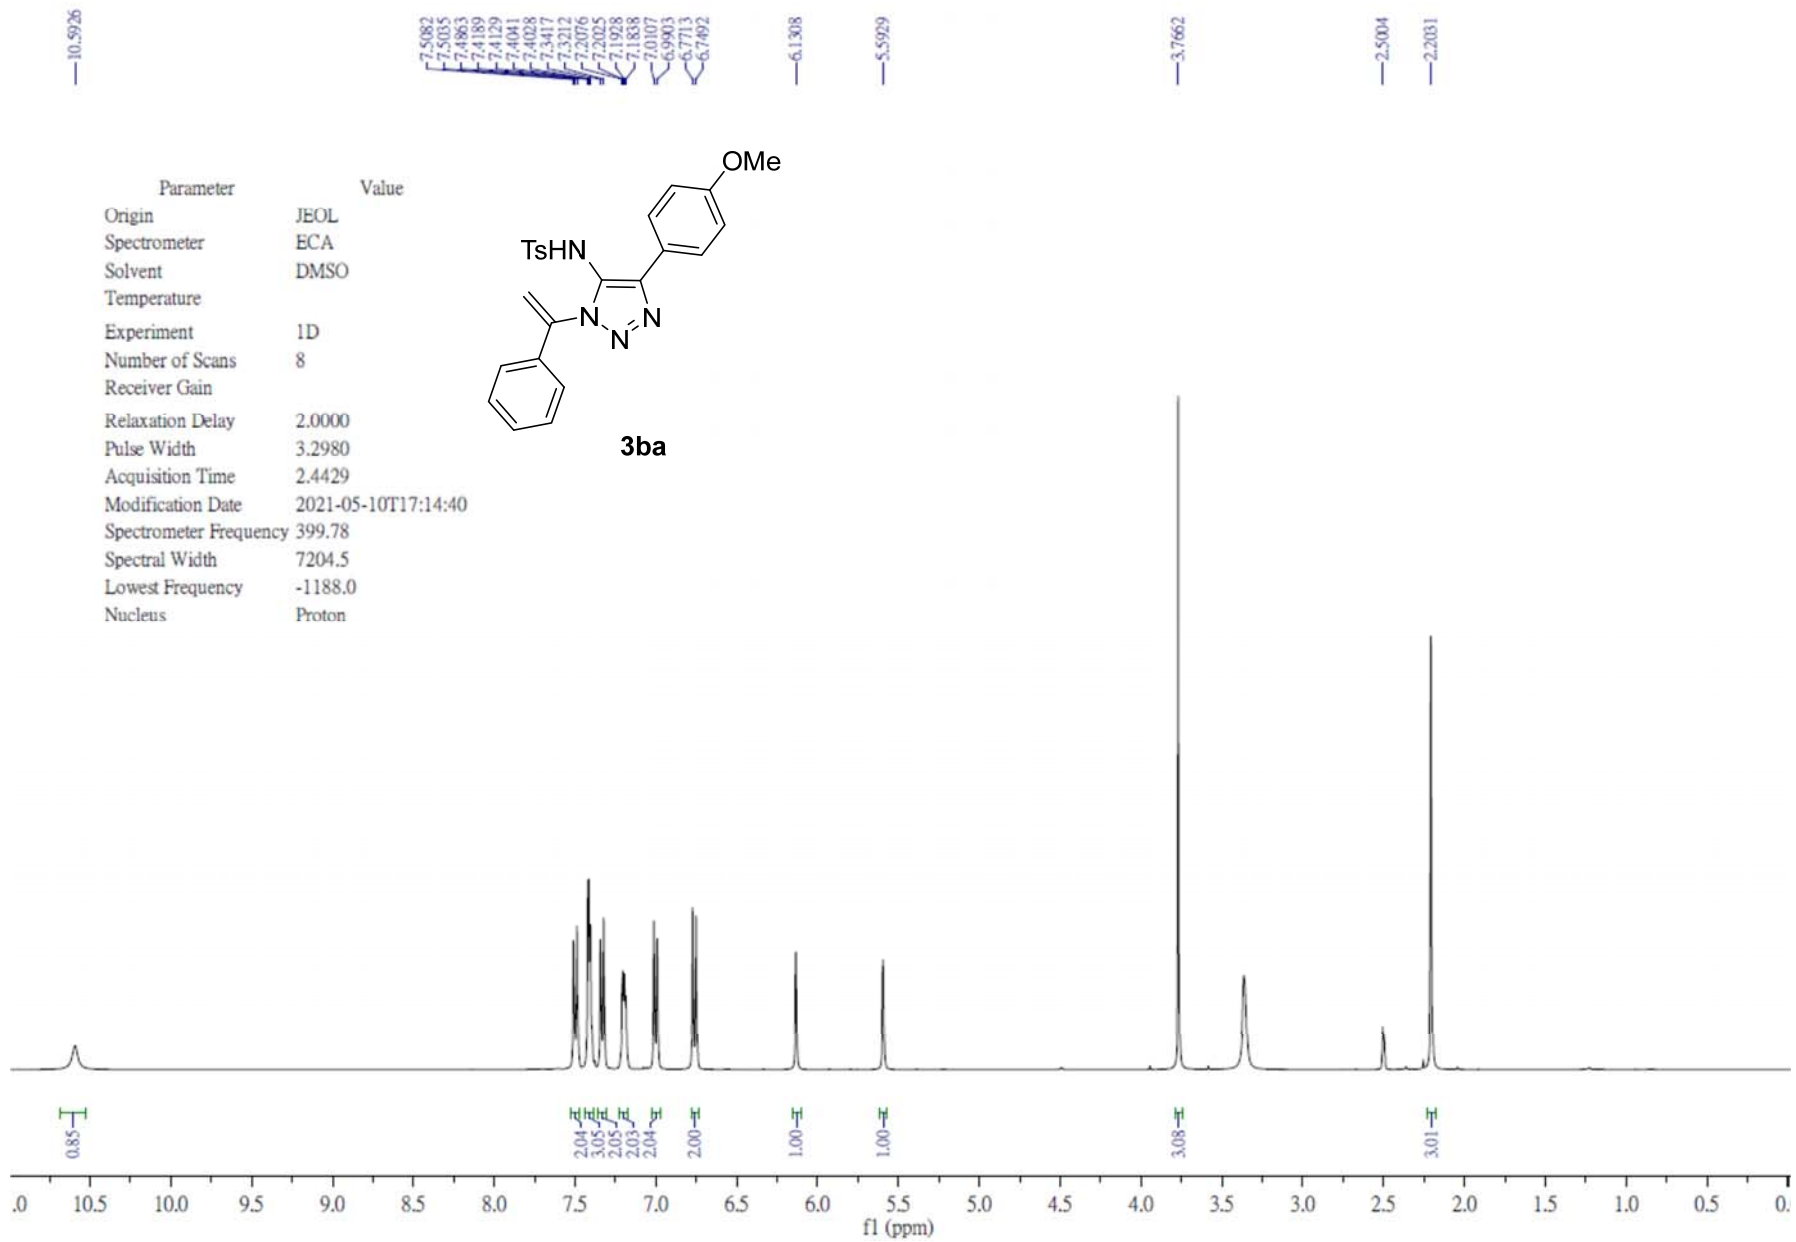

| Parameter              | Value               |
|------------------------|---------------------|
| Origin                 | JEOL                |
| Spectrometer           | ECA                 |
| Solvent                | DMSO                |
| Temperature            |                     |
| Experiment             | 1D                  |
| Number of Scans        | 896                 |
| Receiver Gain          |                     |
| Relaxation Delay       | 2.0000              |
| Pulse Width            | 4.7316              |
| Acquisition Time       | 0.6336              |
| Modification Date      | 2021-05-10T21:11:24 |
| Spectrometer Frequency | 100.53              |
| Spectral Width         | 25252.1             |
| Lowest Frequency       | -2625.9             |
| Nucleus                | Carbon13            |

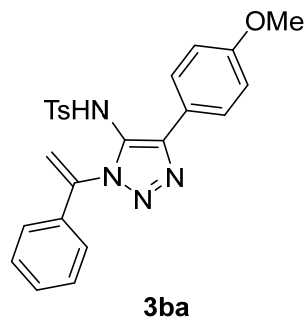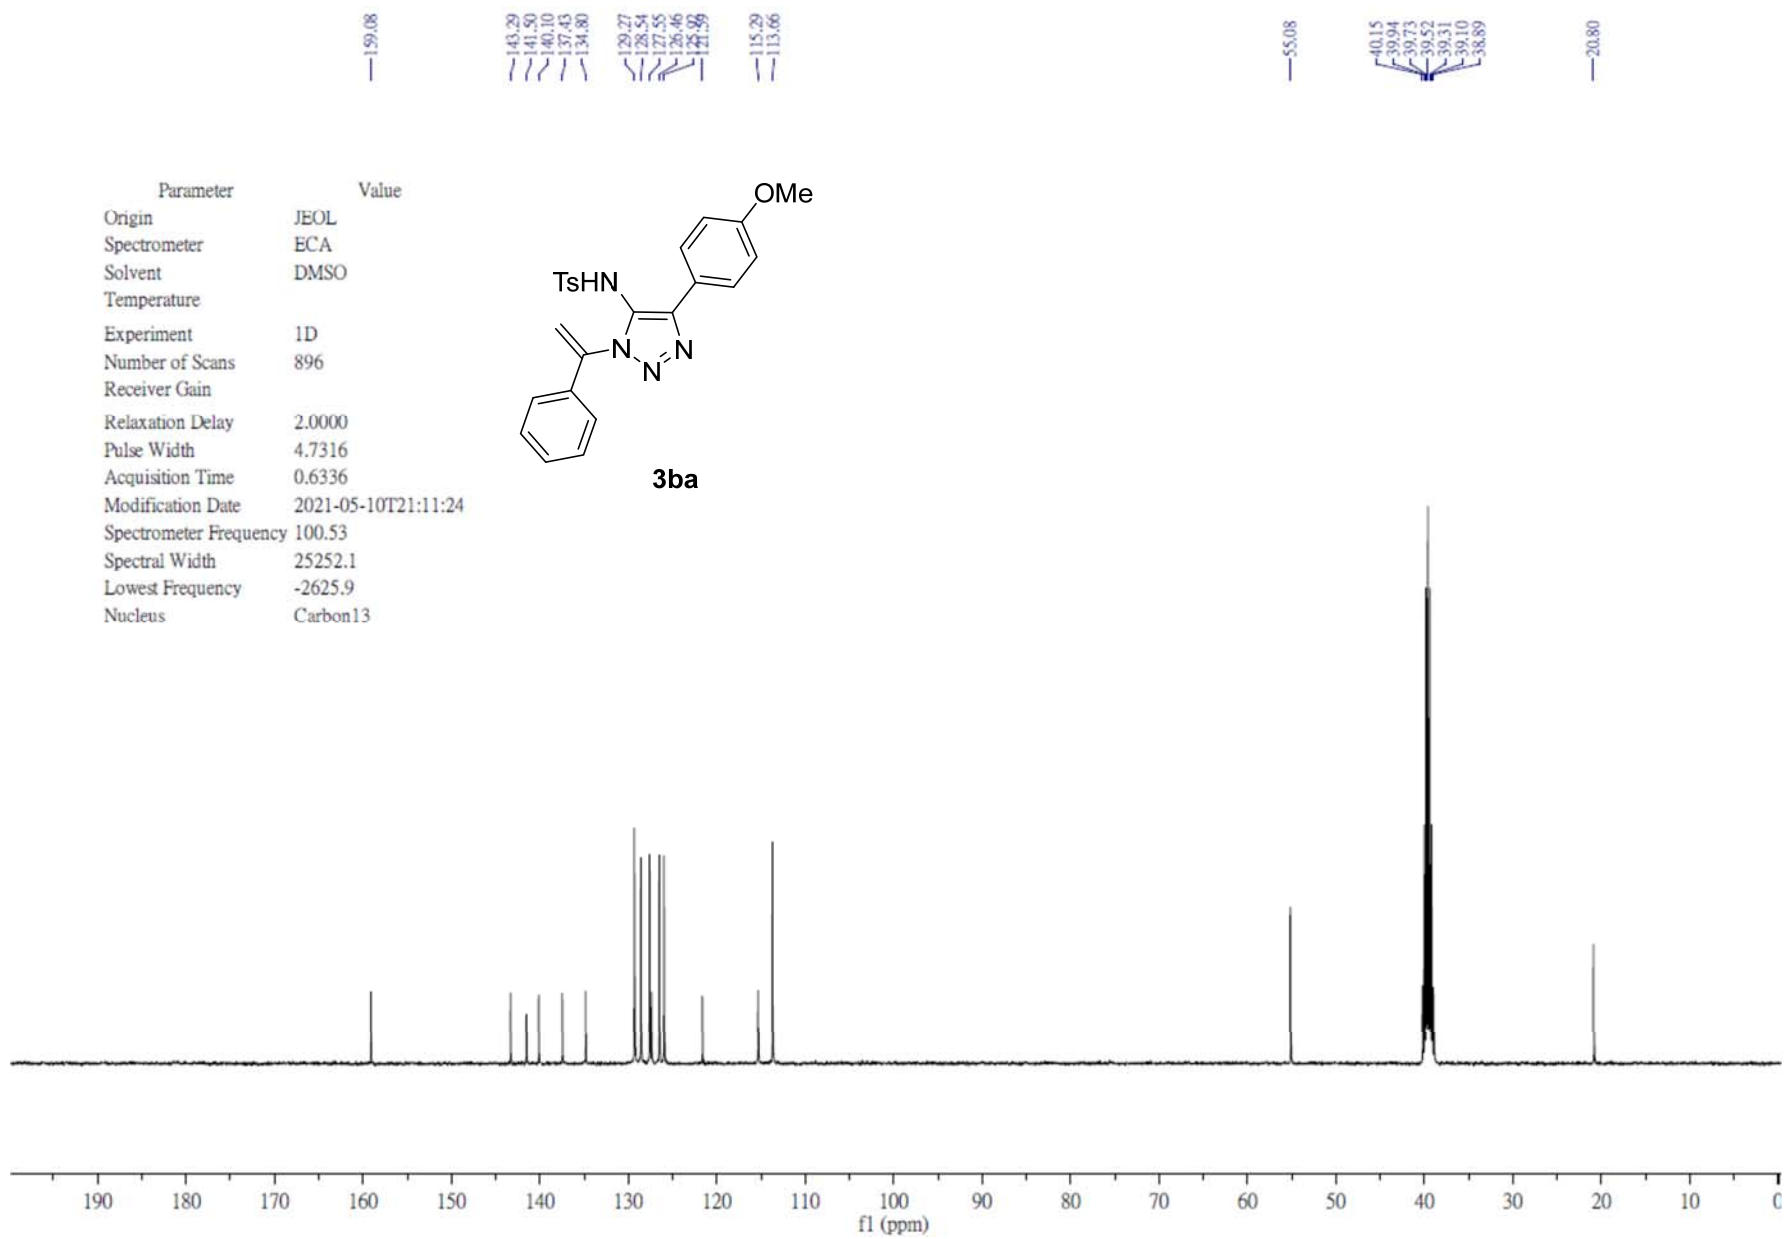

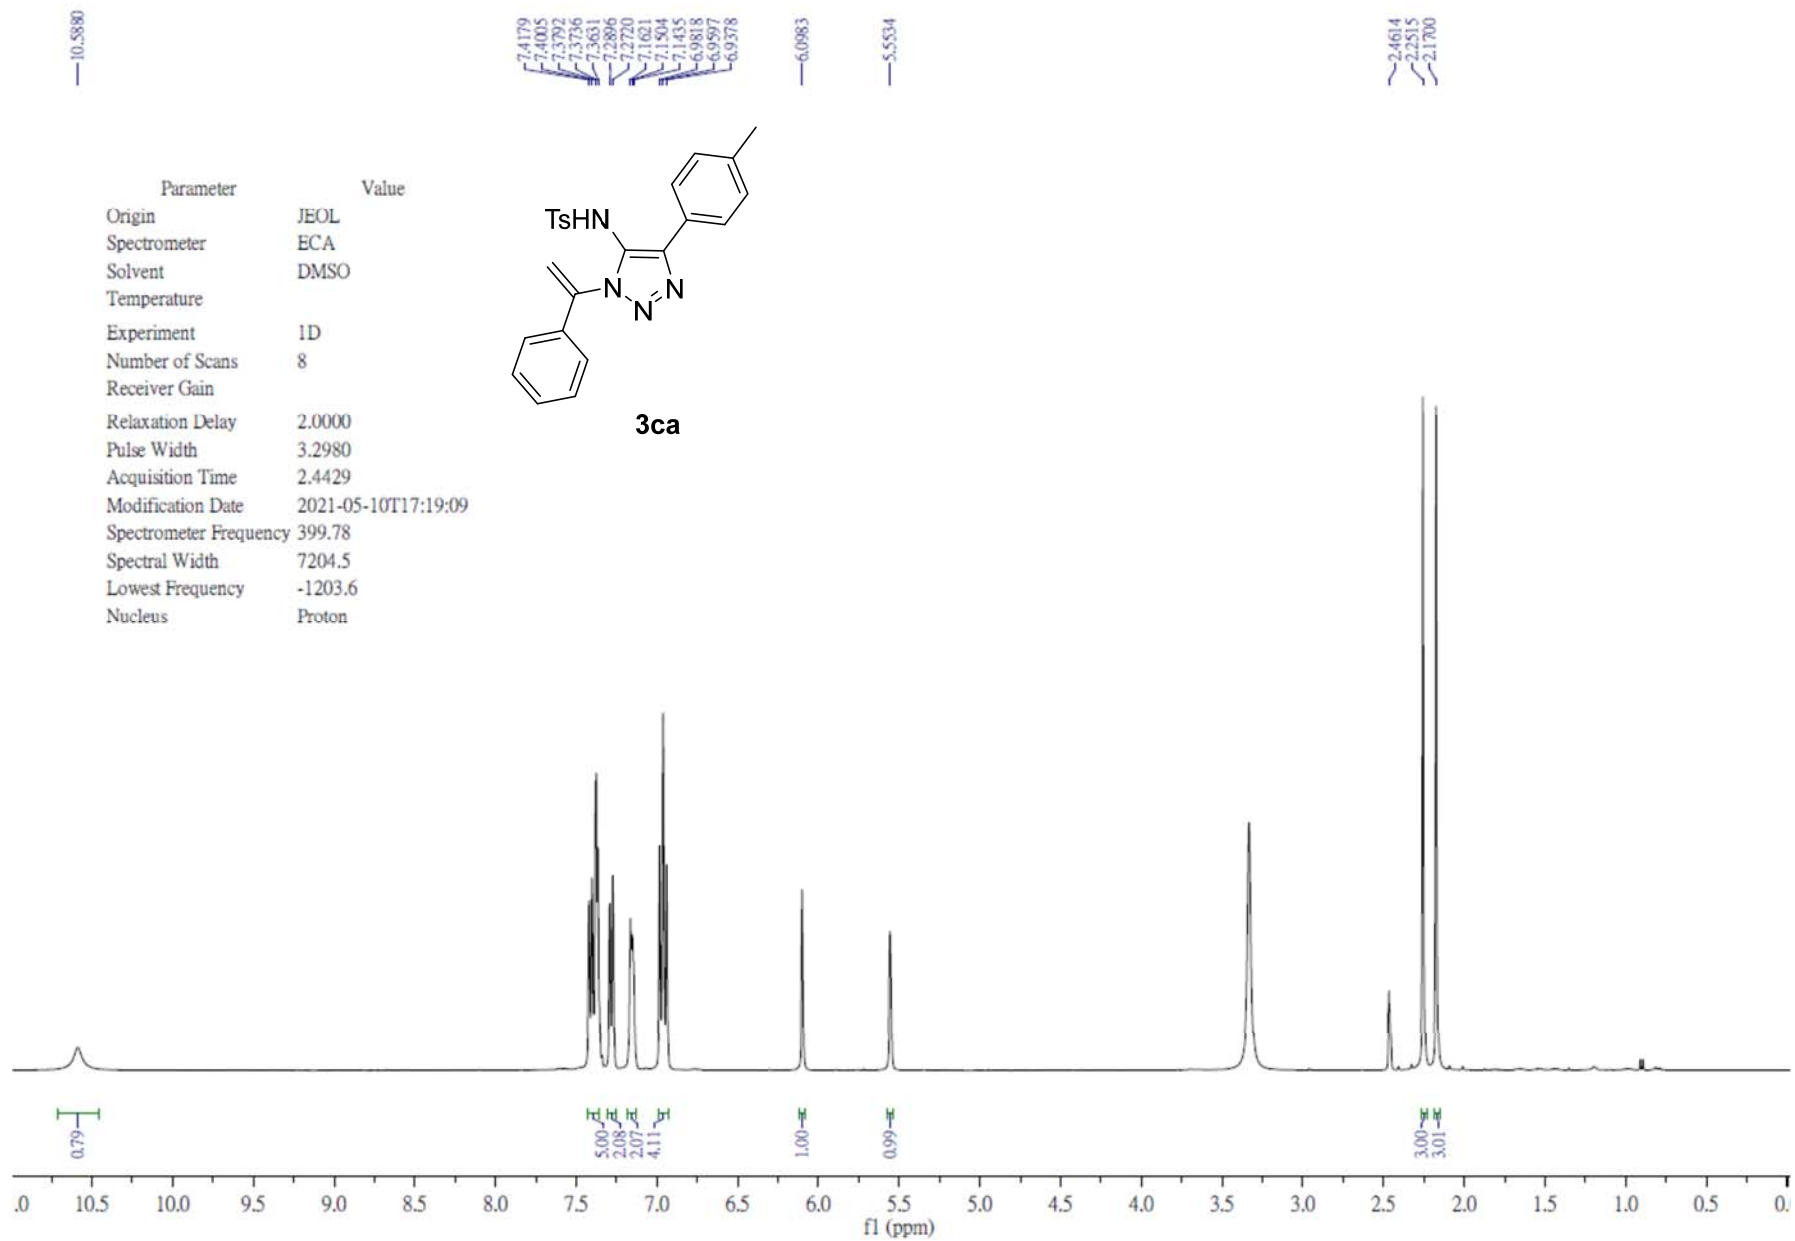

143.40  
141.62  
140.08  
137.38  
137.33  
134.77  
129.24  
128.78  
128.56  
127.81  
126.43  
126.34  
126.09  
125.93  
115.57

40.15  
39.94  
39.73  
39.52  
39.31  
39.10  
38.89

20.93  
20.87

| Parameter              | Value               |
|------------------------|---------------------|
| Origin                 | JEOL                |
| Spectrometer           | ECA                 |
| Solvent                | DMSO                |
| Temperature            |                     |
| Experiment             | 1D                  |
| Number of Scans        | 820                 |
| Receiver Gain          |                     |
| Relaxation Delay       | 2.0000              |
| Pulse Width            | 4.7316              |
| Acquisition Time       | 0.6336              |
| Modification Date      | 2021-05-10T21:14:40 |
| Spectrometer Frequency | 100.53              |
| Spectral Width         | 25252.1             |
| Lowest Frequency       | -2624.1             |
| Nucleus                | Carbon13            |

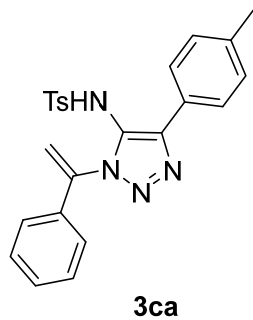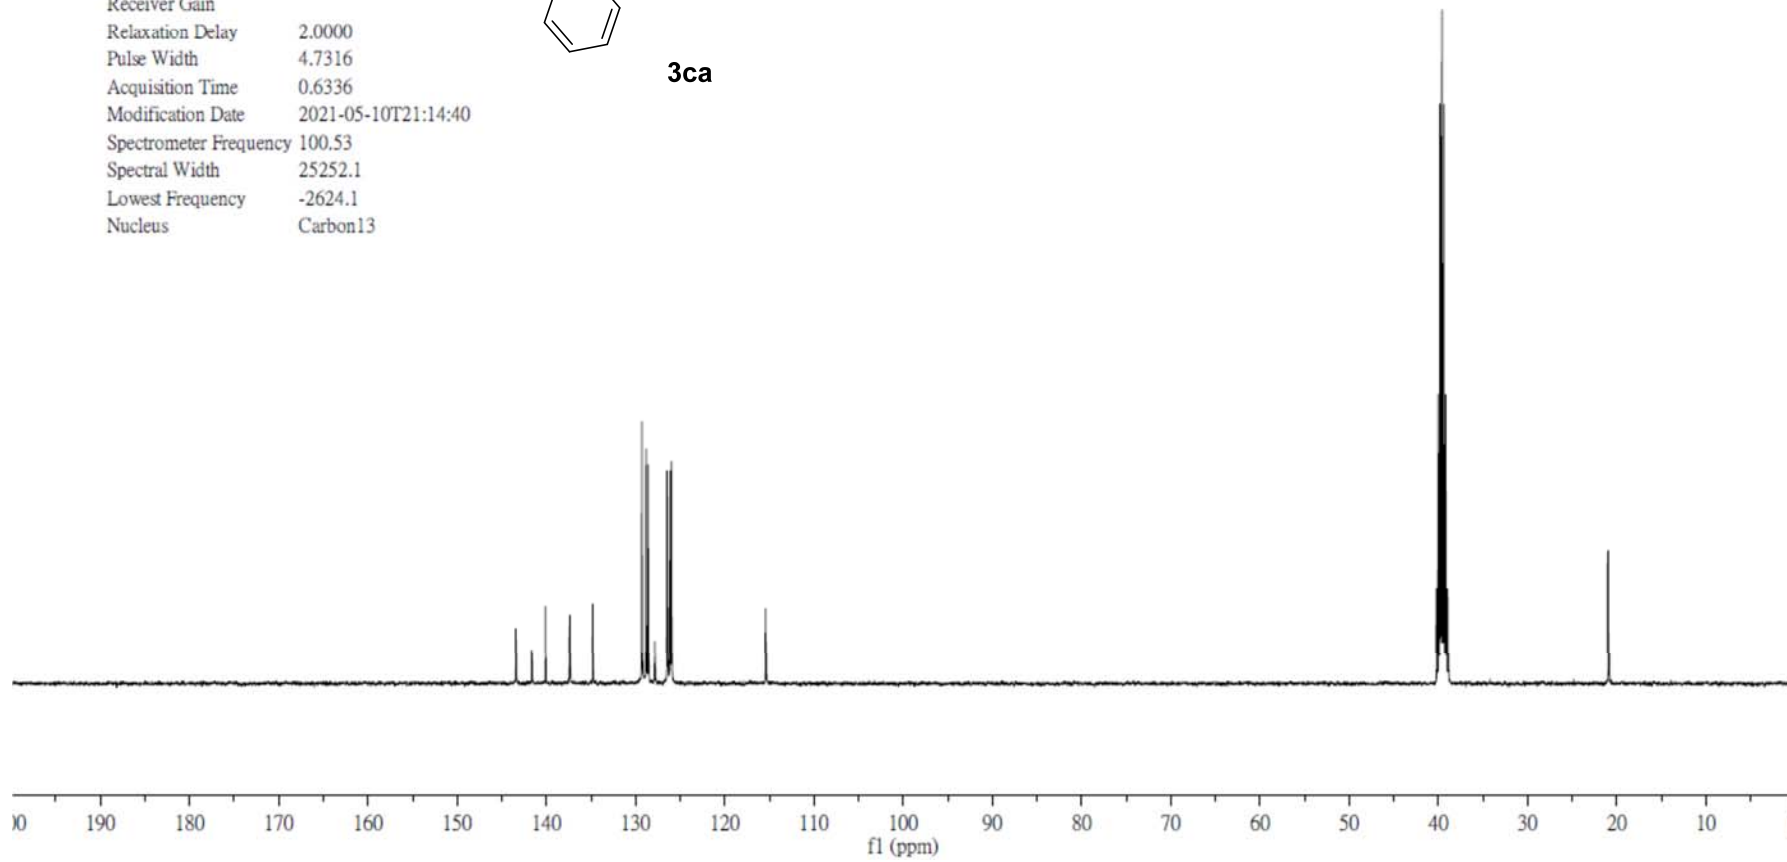

| Parameter              | Value          |
|------------------------|----------------|
| Origin                 | Varian         |
| Spectrometer           | vnmrs          |
| Solvent                | "cdcl3"        |
| Temperature            | 20.0           |
| Pulse Sequence         | s2pul          |
| Experiment             | 1D             |
| Number of Scans        | 16             |
| Receiver Gain          | 30             |
| Relaxation Delay       | 1.0000         |
| Pulse Width            | 0.0000         |
| Acquisition Time       | 2.5559         |
| Spectrometer Frequency | 399.76         |
| Spectral Width         | 6410.3         |
| Lowest Frequency       | -799.4         |
| Nucleus                | <sup>1</sup> H |

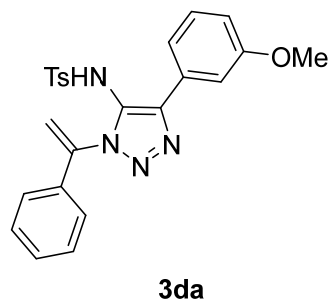

7.3861  
7.3660  
7.3589  
7.3474  
7.3382  
7.1765  
7.1710  
7.1648  
7.1455  
7.1290  
7.1028  
7.0826  
7.0624  
6.9679  
6.9479  
6.7927  
6.7889  
6.7722  
6.7686

5.7159  
5.5853

3.7543

2.2933

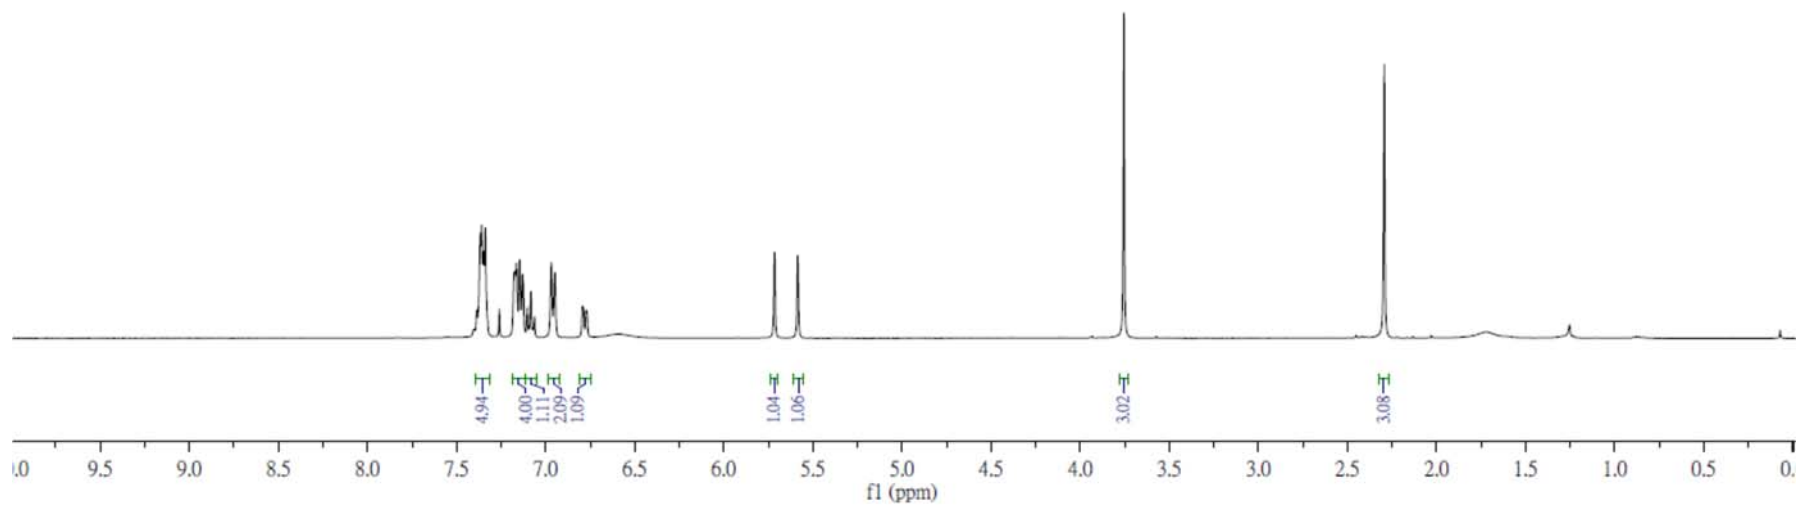

| Parameter              | Value               |
|------------------------|---------------------|
| Origin                 | JEOL                |
| Spectrometer           | ECA                 |
| Solvent                | DMSO                |
| Temperature            |                     |
| Experiment             | 1D                  |
| Number of Scans        | 661                 |
| Receiver Gain          |                     |
| Relaxation Delay       | 2.0000              |
| Pulse Width            | 4.7316              |
| Acquisition Time       | 0.6336              |
| Modification Date      | 2021-05-10T23:42:02 |
| Spectrometer Frequency | 100.53              |
| Spectral Width         | 25252.1             |
| Lowest Frequency       | -2622.9             |
| Nucleus                | Carbon13            |

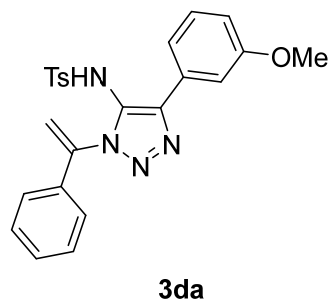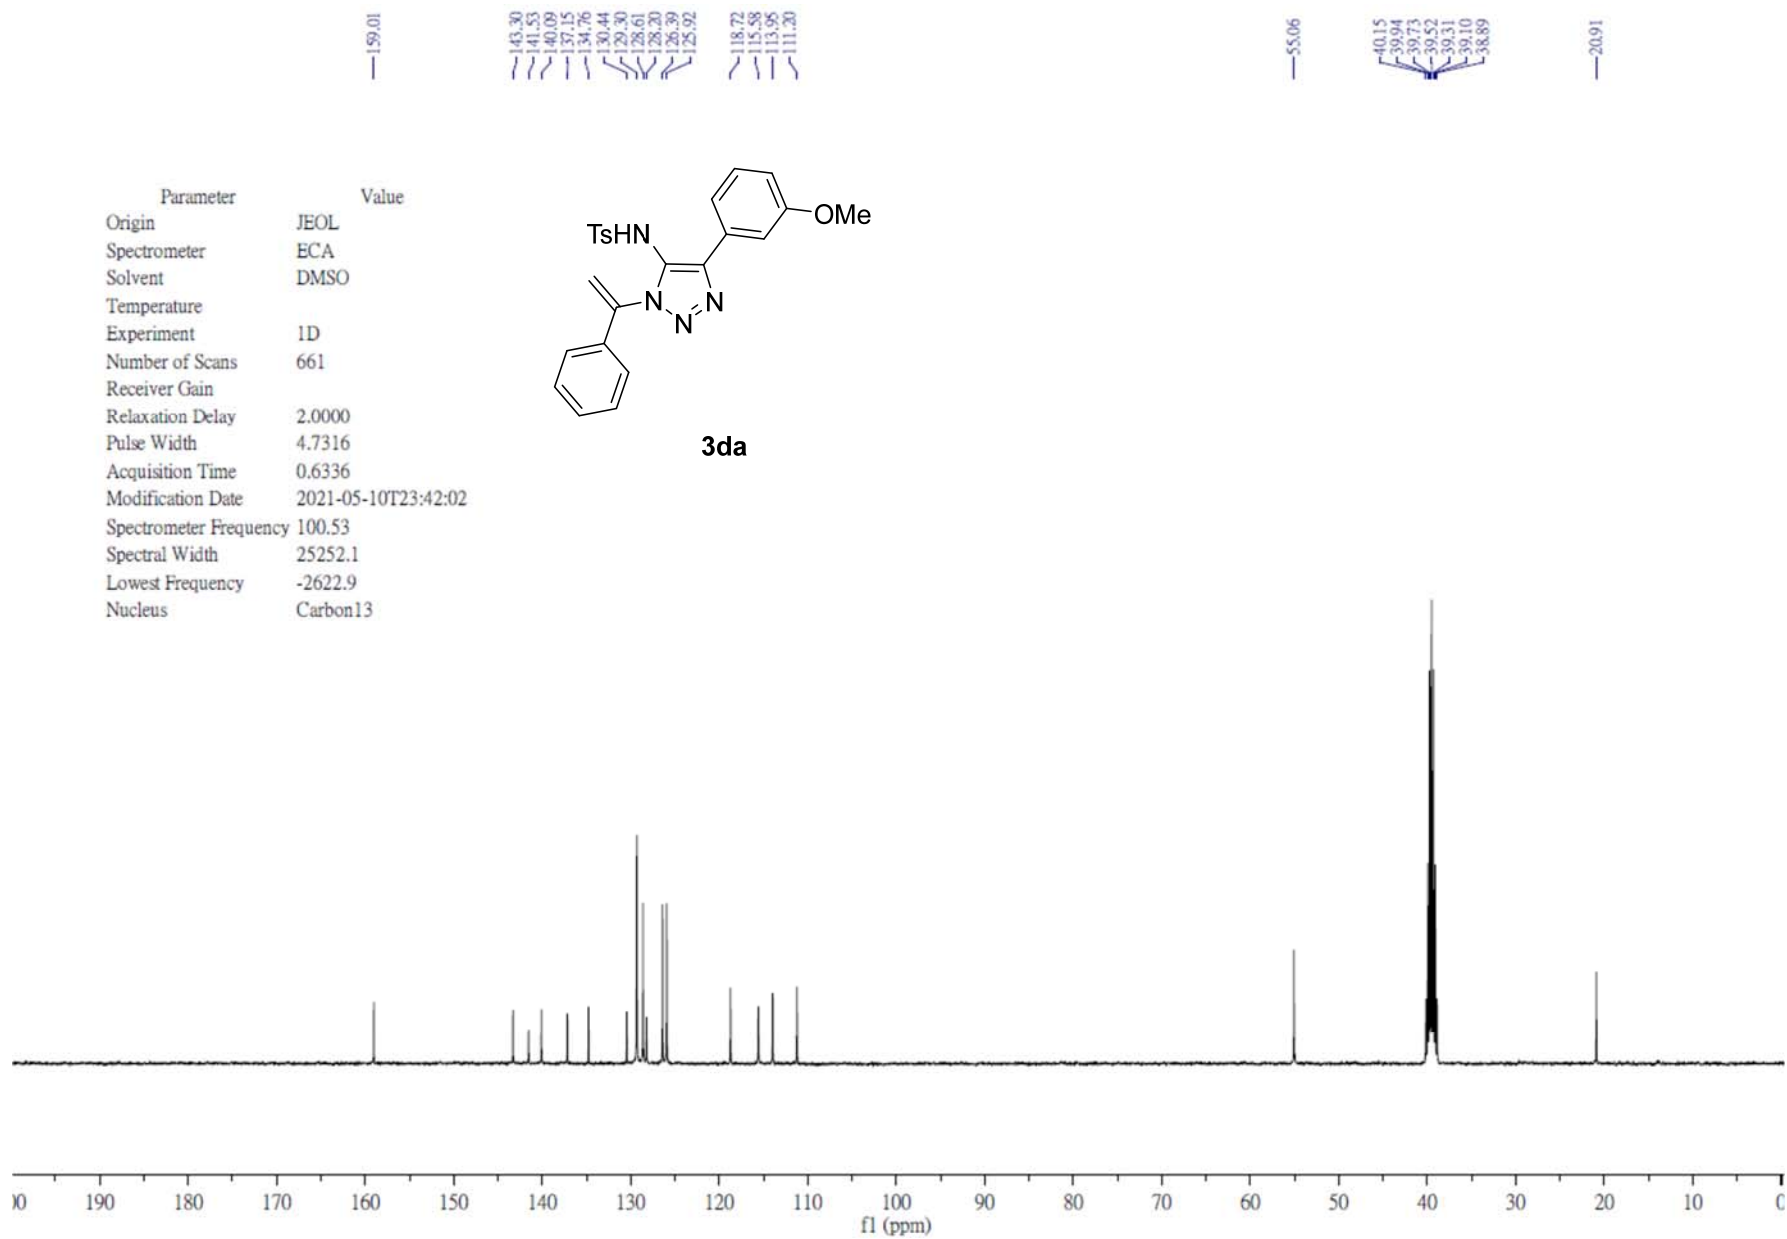



7.9763  
7.8455  
7.8323  
7.8225  
7.7306  
7.7091  
7.6992  
7.6729  
7.6617  
7.6486  
7.4860  
7.4758  
7.4655  
7.4064  
7.3904  
7.2657  
7.2453  
7.2347  
7.2268  
7.2180  
6.6693  
6.6489

6.1686  
5.6375

2.4615

1.7180

| Parameter              | Value               |
|------------------------|---------------------|
| Origin                 | JEOL                |
| Spectrometer           | ECA                 |
| Solvent                | DMSO                |
| Temperature            |                     |
| Experiment             | 1D                  |
| Number of Scans        | 8                   |
| Receiver Gain          |                     |
| Relaxation Delay       | 2.0000              |
| Pulse Width            | 3.2980              |
| Acquisition Time       | 2.4429              |
| Modification Date      | 2021-05-18T17:20:13 |
| Spectrometer Frequency | 399.78              |
| Spectral Width         | 7204.5              |
| Lowest Frequency       | -1203.6             |
| Nucleus                | Proton              |

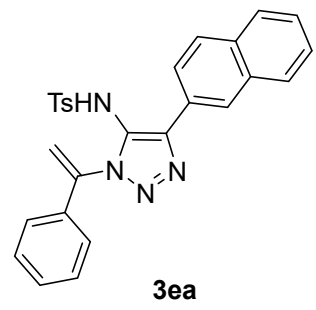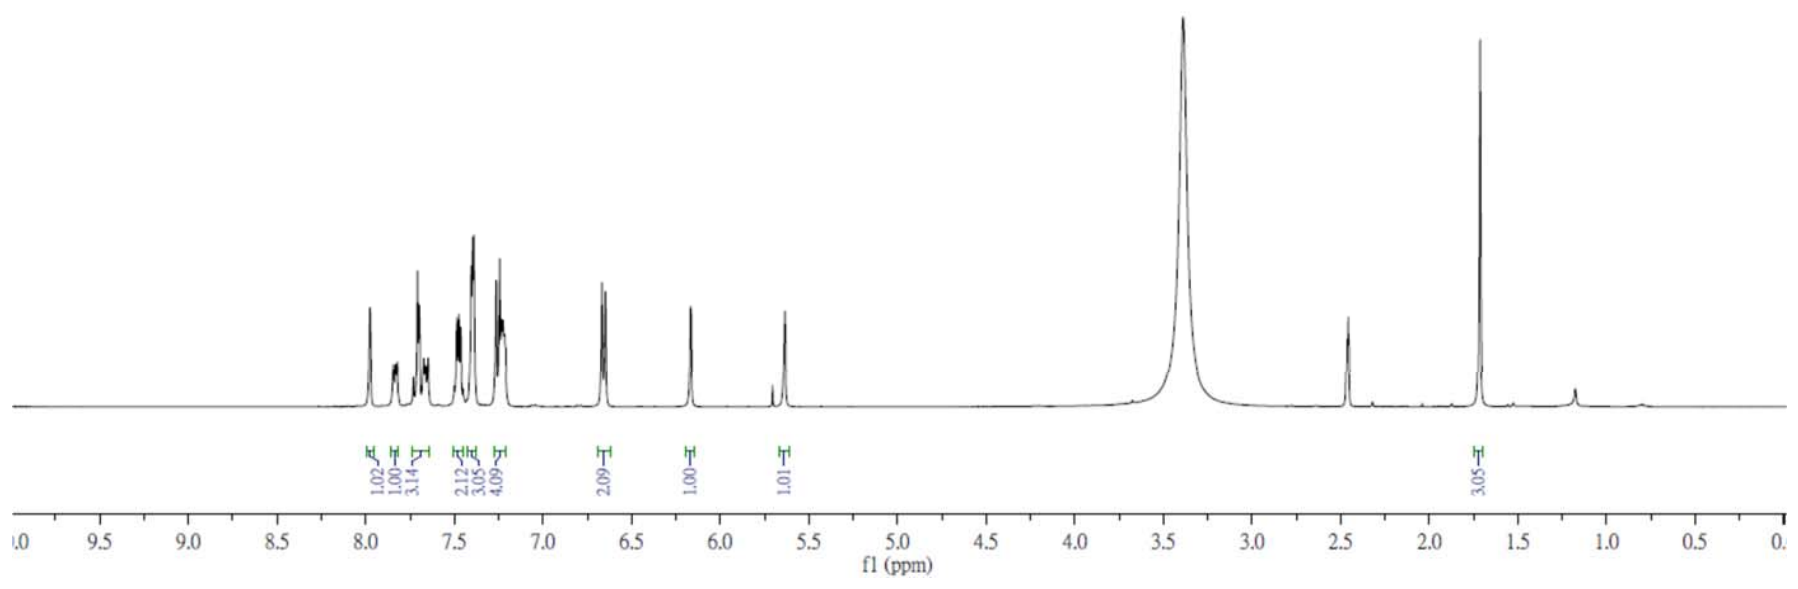

143.18  
141.28  
140.22  
137.37  
134.90  
132.57  
132.35  
129.28  
129.11  
128.61  
128.06  
127.75  
127.46  
126.63  
126.28  
126.20  
126.00  
125.23  
124.03  
115.53

40.15  
39.94  
39.73  
39.52  
39.31  
39.10  
38.89

20.46

| Parameter              | Value               |
|------------------------|---------------------|
| Origin                 | JEOL                |
| Spectrometer           | ECA                 |
| Solvent                | DMSO                |
| Temperature            |                     |
| Experiment             | 1D                  |
| Number of Scans        | 885                 |
| Receiver Gain          |                     |
| Relaxation Delay       | 2.0000              |
| Pulse Width            | 4.7316              |
| Acquisition Time       | 0.6336              |
| Modification Date      | 2021-05-18T17:22:03 |
| Spectrometer Frequency | 100.53              |
| Spectral Width         | 25252.1             |
| Lowest Frequency       | -2625.9             |
| Nucleus                | Carbon13            |

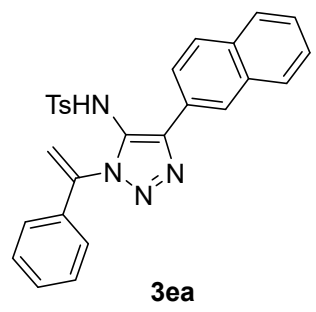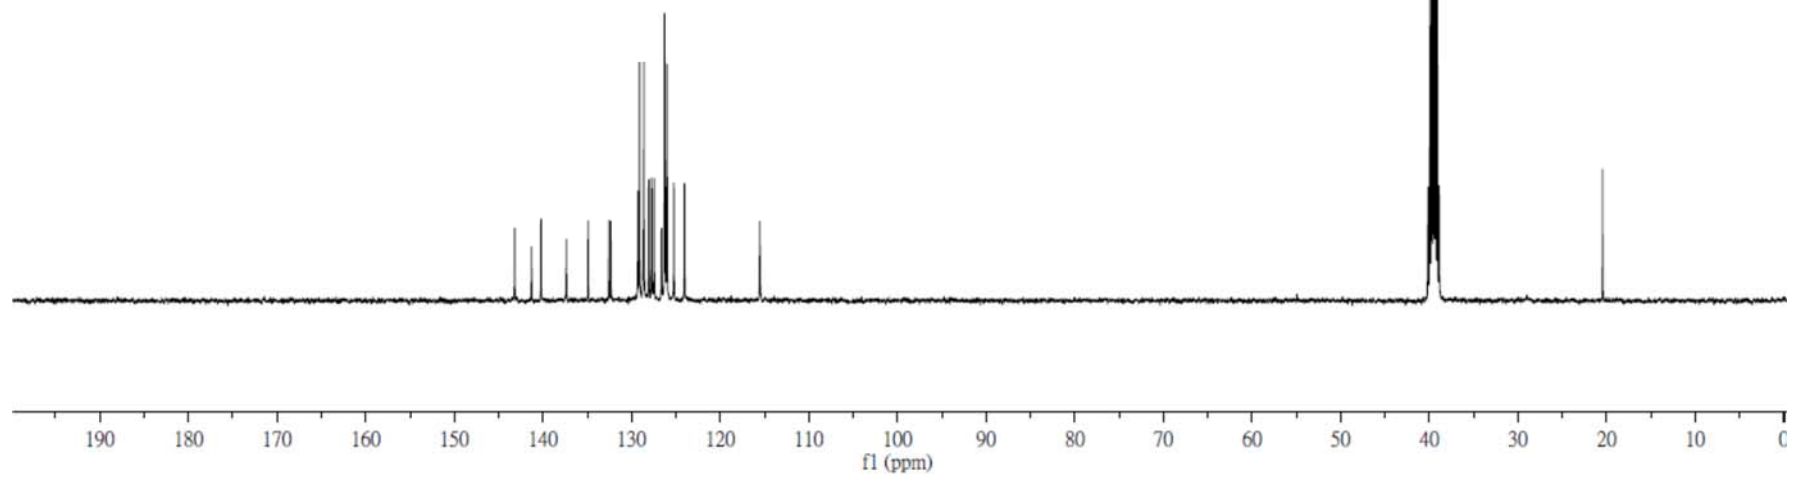

| Parameter              | Value               |
|------------------------|---------------------|
| Origin                 | JEOL                |
| Spectrometer           | ECA                 |
| Solvent                | cdcl3               |
| Temperature            |                     |
| Experiment             | 1D                  |
| Number of Scans        | 8                   |
| Receiver Gain          |                     |
| Relaxation Delay       | 2.0000              |
| Pulse Width            | 3.2980              |
| Acquisition Time       | 2.4429              |
| Modification Date      | 2021-05-10T18:43:39 |
| Spectrometer Frequency | 399.78              |
| Spectral Width         | 7204.5              |
| Lowest Frequency       | -1203.6             |
| Nucleus                | Proton              |

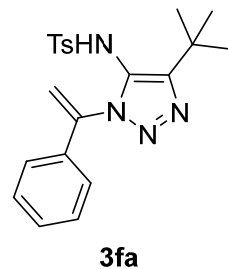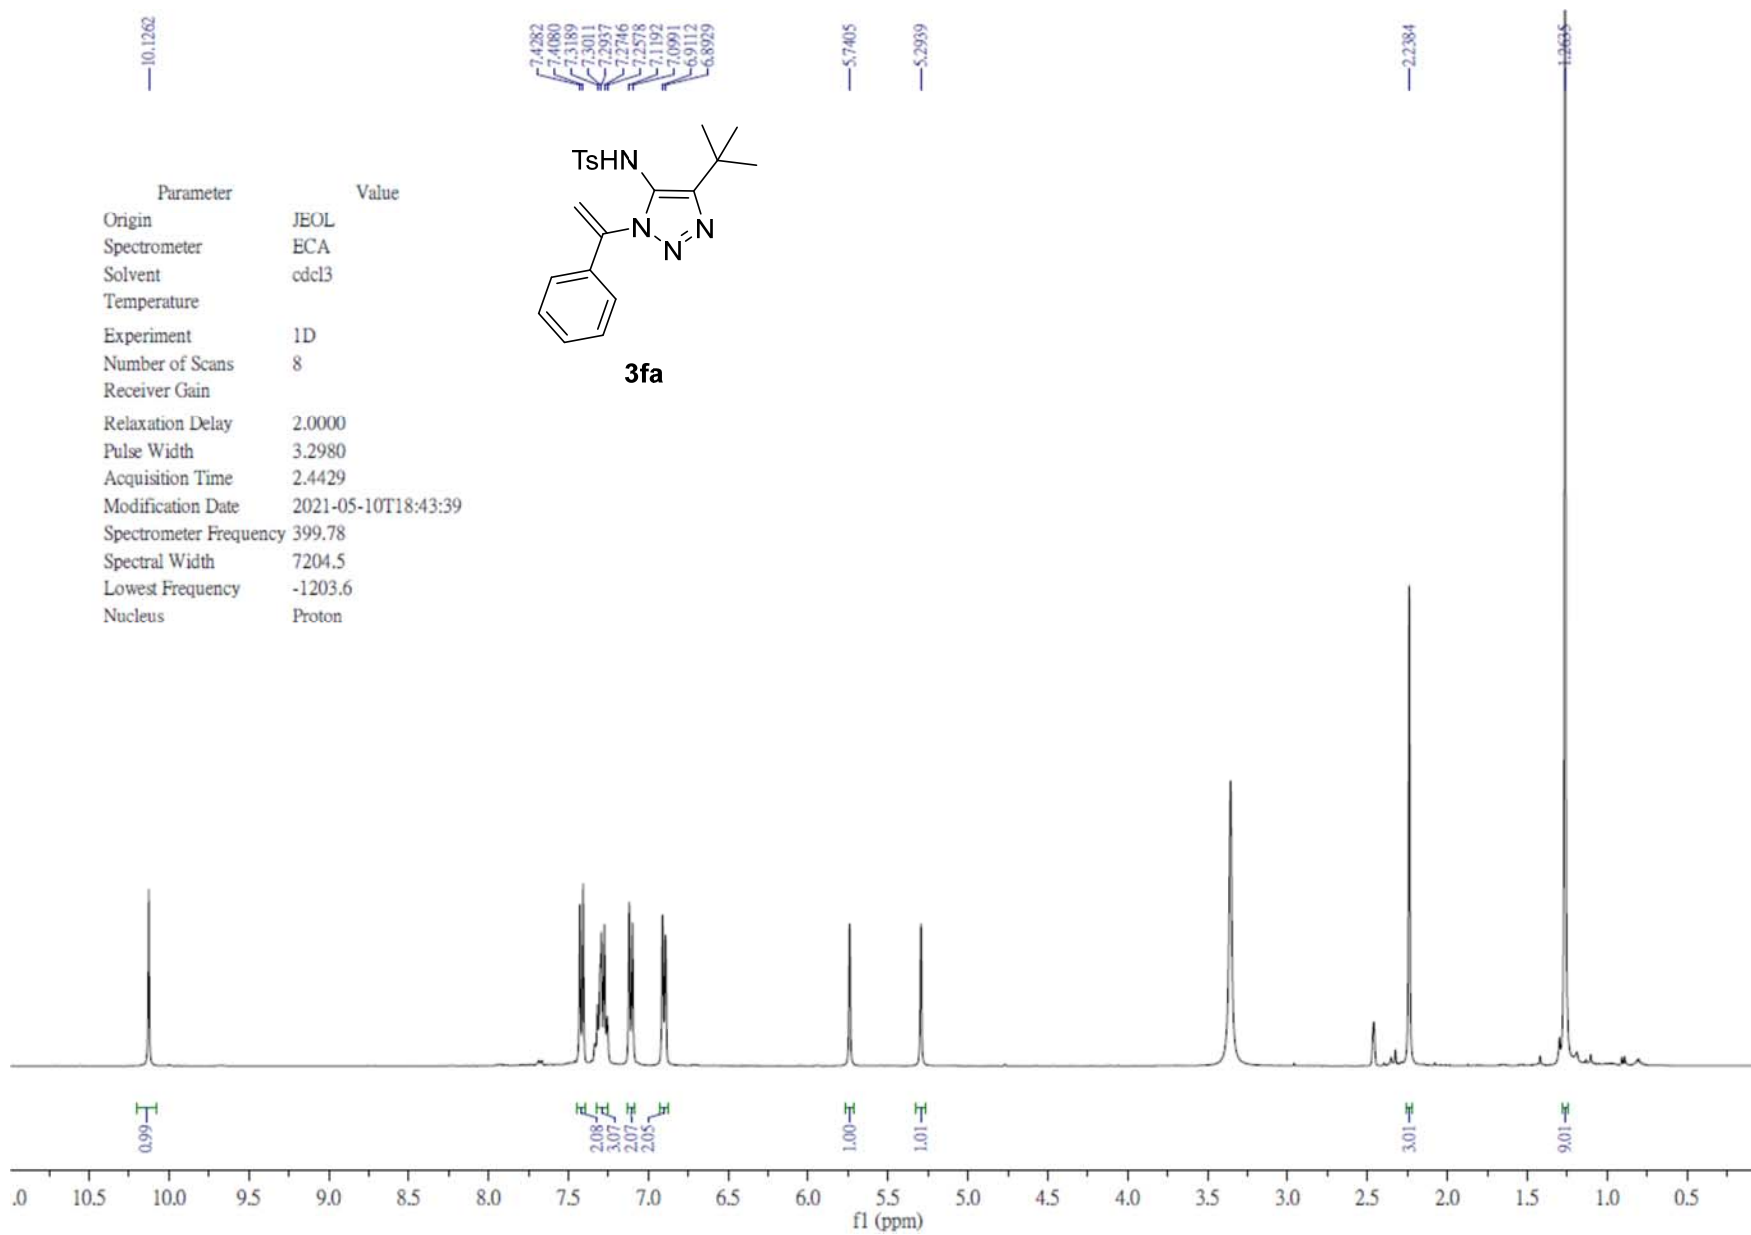

| Parameter              | Value               |
|------------------------|---------------------|
| Origin                 | JEOL                |
| Spectrometer           | ECA                 |
| Solvent                | DMSO                |
| Temperature            |                     |
| Experiment             | 1D                  |
| Number of Scans        | 800                 |
| Receiver Gain          |                     |
| Relaxation Delay       | 2.0000              |
| Pulse Width            | 4.7316              |
| Acquisition Time       | 0.6336              |
| Modification Date      | 2021-05-10T21:26:21 |
| Spectrometer Frequency | 100.53              |
| Spectral Width         | 25252.1             |
| Lowest Frequency       | -2622.8             |
| Nucleus                | Carbon13            |

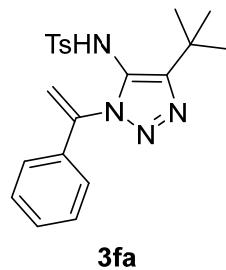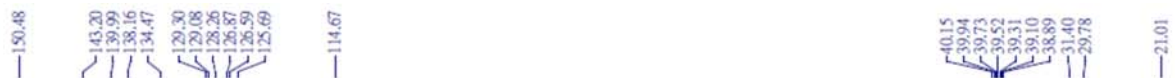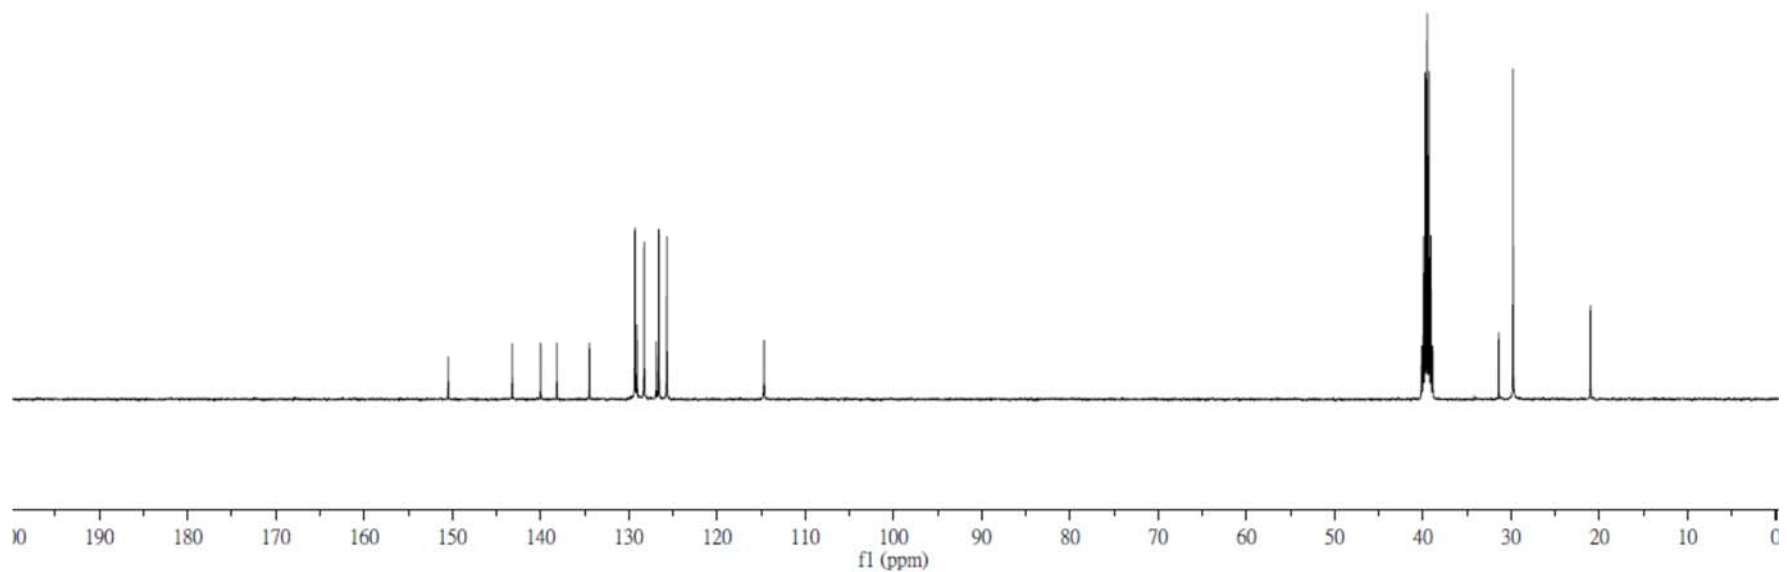

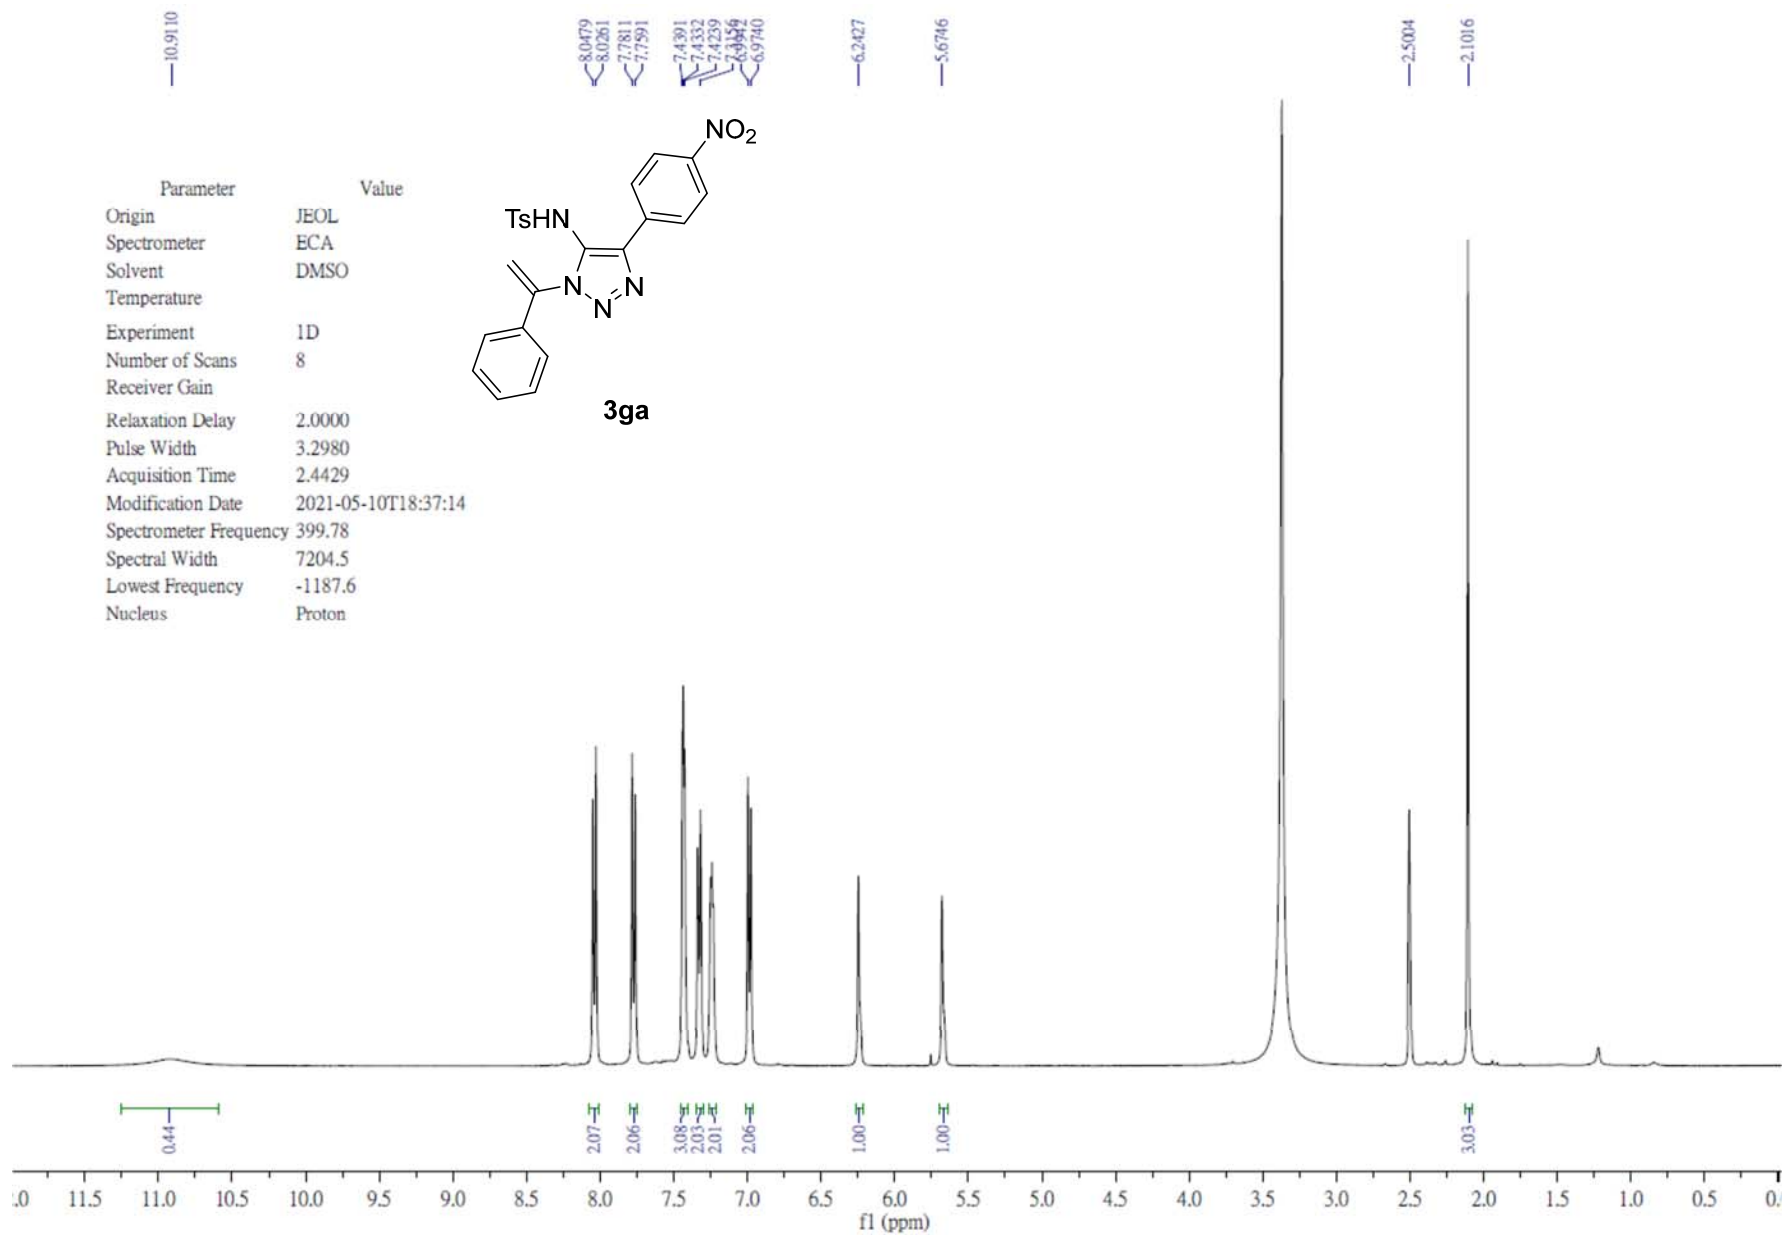

| Parameter              | Value               |
|------------------------|---------------------|
| Origin                 | JEOL                |
| Spectrometer           | ECA                 |
| Solvent                | DMSO                |
| Temperature            |                     |
| Experiment             | 1D                  |
| Number of Scans        | 8                   |
| Receiver Gain          |                     |
| Relaxation Delay       | 2.0000              |
| Pulse Width            | 3.2980              |
| Acquisition Time       | 2.4429              |
| Modification Date      | 2021-05-10T18:37:14 |
| Spectrometer Frequency | 399.78              |
| Spectral Width         | 7204.5              |
| Lowest Frequency       | -1187.6             |
| Nucleus                | Proton              |

| Parameter              | Value               |
|------------------------|---------------------|
| Origin                 | JEOL                |
| Spectrometer           | ECA                 |
| Solvent                | DMSO                |
| Temperature            |                     |
| Experiment             | 1D                  |
| Number of Scans        | 825                 |
| Receiver Gain          |                     |
| Relaxation Delay       | 2.0000              |
| Pulse Width            | 4.7316              |
| Acquisition Time       | 0.6336              |
| Modification Date      | 2021-05-10T21:20:29 |
| Spectrometer Frequency | 100.53              |
| Spectral Width         | 25252.1             |
| Lowest Frequency       | -2573.5             |
| Nucleus                | Carbon13            |

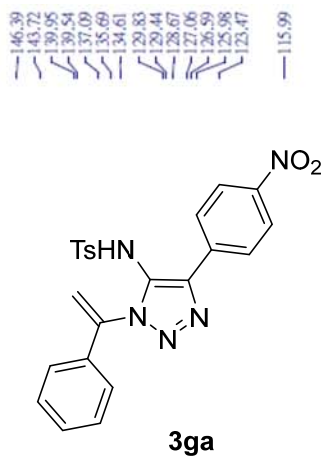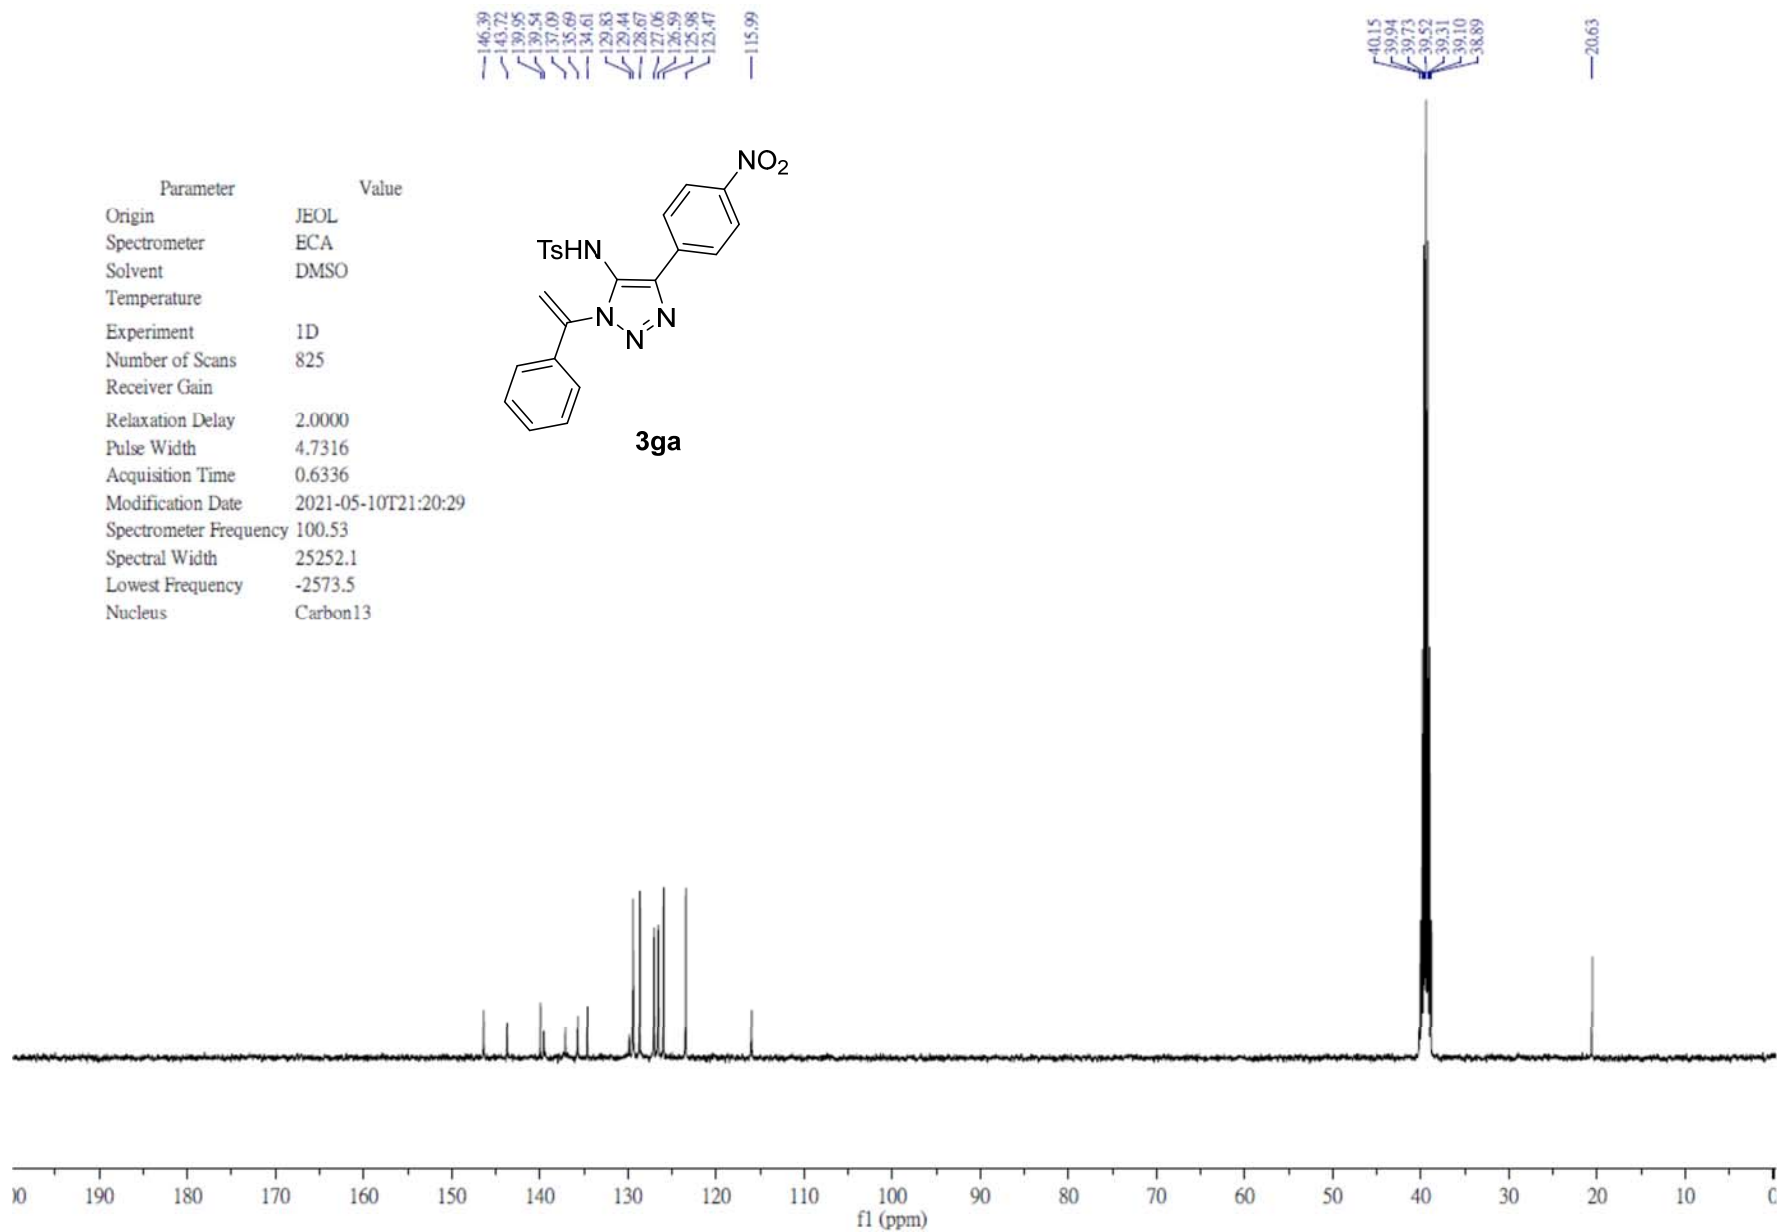

10.7324

7.5306  
7.5097  
7.4213  
7.4135  
7.3278  
7.3077  
7.2513  
7.2297  
7.2135  
7.0124  
6.9926

6.1970

5.6313

2.4997

2.2359

| Parameter              | Value               |
|------------------------|---------------------|
| Origin                 | JEOL                |
| Spectrometer           | ECA                 |
| Solvent                | DMSO                |
| Temperature            |                     |
| Experiment             | 1D                  |
| Number of Scans        | 8                   |
| Receiver Gain          |                     |
| Relaxation Delay       | 2.0000              |
| Pulse Width            | 3.2980              |
| Acquisition Time       | 2.4429              |
| Modification Date      | 2021-05-10T18:51:38 |
| Spectrometer Frequency | 399.78              |
| Spectral Width         | 7204.5              |
| Lowest Frequency       | -1187.6             |
| Nucleus                | Proton              |

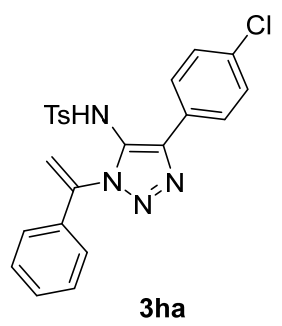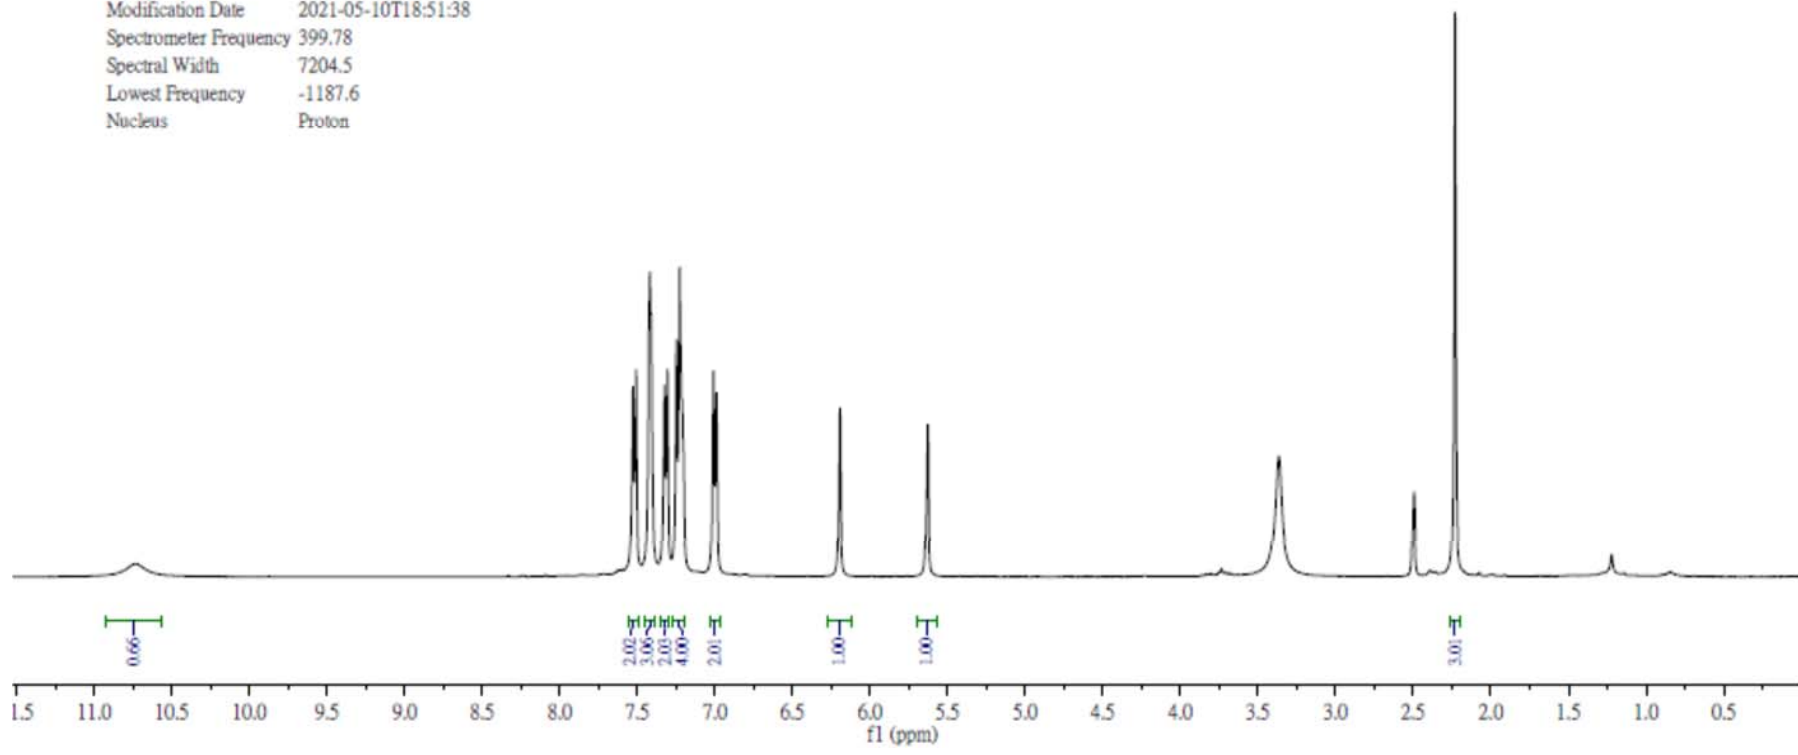

143.67  
140.45  
140.04  
137.26  
134.74  
132.70  
129.34  
128.63  
128.49  
128.29  
128.04  
127.83  
126.50  
123.95  
115.67

40.15  
39.94  
39.73  
39.52  
39.31  
39.10  
38.89  
20.96

| Parameter              | Value               |
|------------------------|---------------------|
| Origin                 | JEOL                |
| Spectrometer           | ECA                 |
| Solvent                | DMSO                |
| Temperature            |                     |
| Experiment             | 1D                  |
| Number of Scans        | 698                 |
| Receiver Gain          |                     |
| Relaxation Delay       | 2.0000              |
| Pulse Width            | 4.7316              |
| Acquisition Time       | 0.6336              |
| Modification Date      | 2021-05-10T21:29:40 |
| Spectrometer Frequency | 100.53              |
| Spectral Width         | 25252.1             |
| Lowest Frequency       | -2623.2             |
| Nucleus                | Carbon13            |

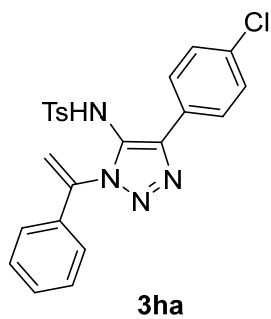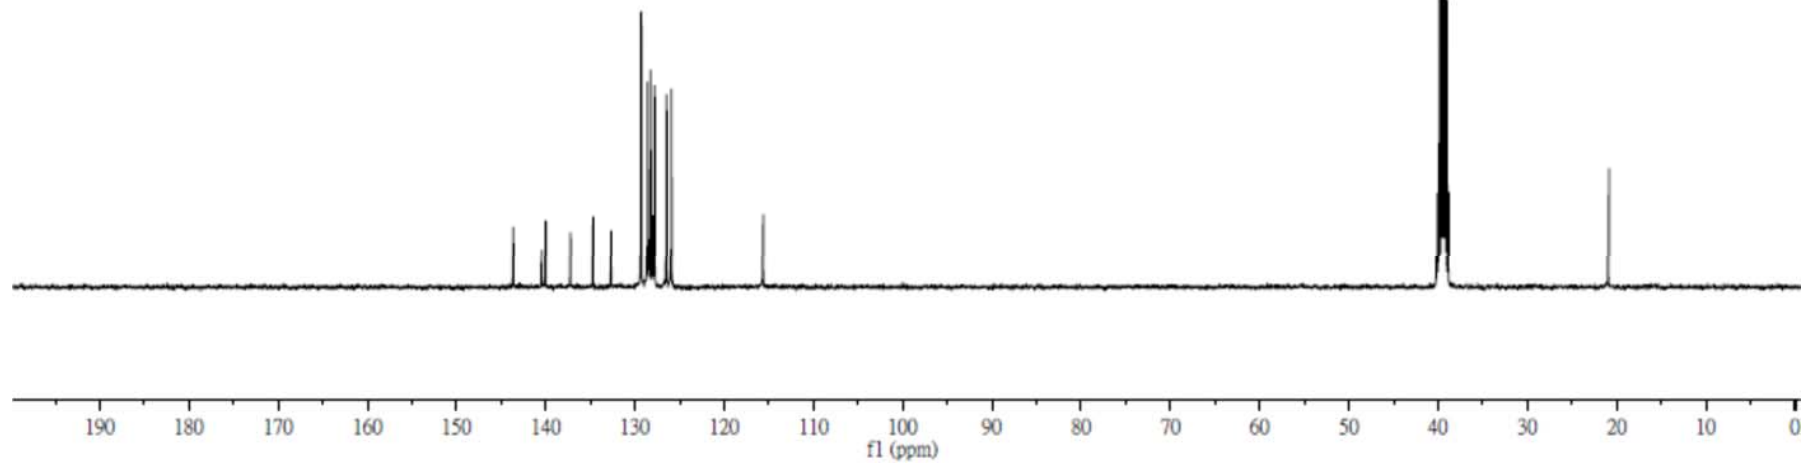



10.8192

7.7792  
7.7585  
7.6880  
7.6641  
7.4336  
7.4263  
7.4173  
6.9916  
6.9516

6.2045

5.6451

2.5940  
2.5001

2.1012

| Parameter              | Value               |
|------------------------|---------------------|
| Origin                 | JEOL                |
| Spectrometer           | ECA                 |
| Solvent                | DMSO                |
| Temperature            |                     |
| Experiment             | 1D                  |
| Number of Scans        | 8                   |
| Receiver Gain          |                     |
| Relaxation Delay       | 2.0000              |
| Pulse Width            | 3.2980              |
| Acquisition Time       | 2.4429              |
| Modification Date      | 2021-05-10T17:23:29 |
| Spectrometer Frequency | 399.78              |
| Spectral Width         | 7204.5              |
| Lowest Frequency       | -1188.0             |
| Nucleus                | Proton              |

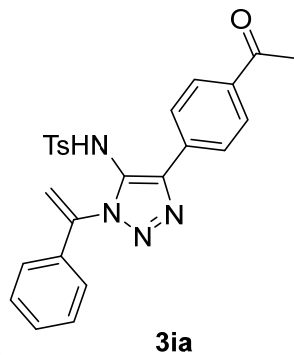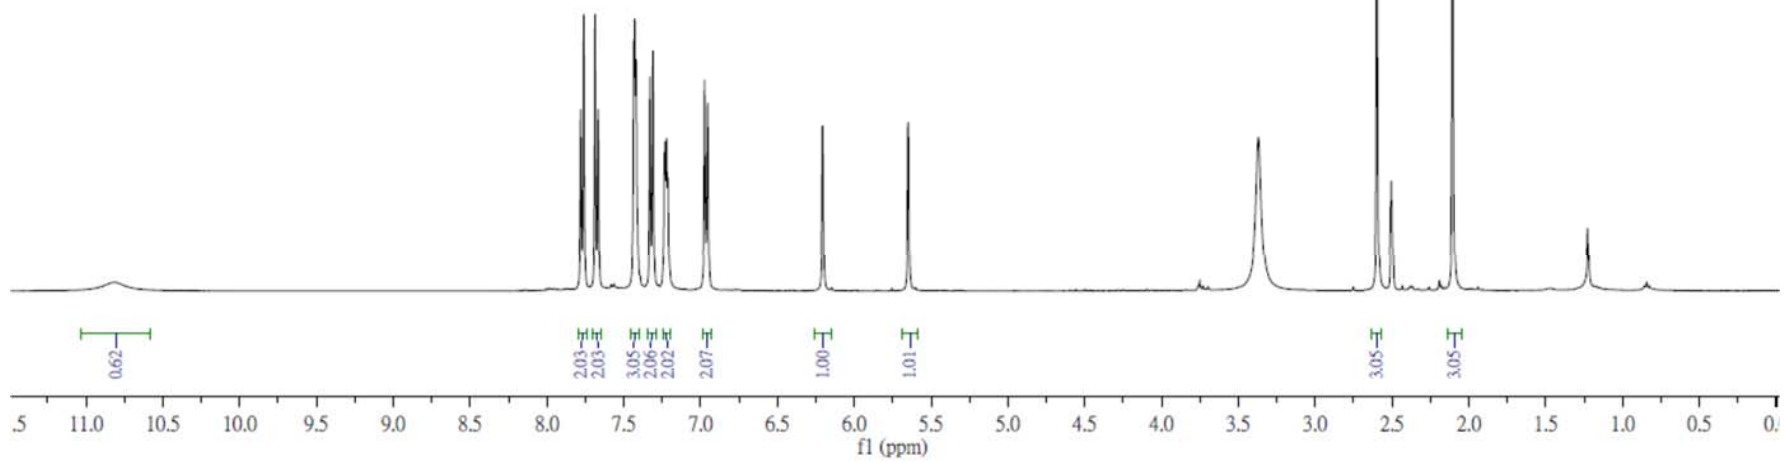

197.41

143.52  
140.48  
139.99  
137.11  
135.67  
134.67  
133.56  
129.37  
129.14  
128.62  
128.15  
126.49  
126.15  
125.95  
115.76

40.15  
39.94  
39.73  
39.52  
39.31  
39.10  
38.89

26.72

20.76

| Parameter              | Value               |
|------------------------|---------------------|
| Origin                 | JEOL                |
| Spectrometer           | ECA                 |
| Solvent                | DMSO                |
| Temperature            |                     |
| Experiment             | 1D                  |
| Number of Scans        | 731                 |
| Receiver Gain          |                     |
| Relaxation Delay       | 2.0000              |
| Pulse Width            | 4.7316              |
| Acquisition Time       | 0.6336              |
| Modification Date      | 2021-05-10T21:18:22 |
| Spectrometer Frequency | 100.53              |
| Spectral Width         | 25252.1             |
| Lowest Frequency       | -2624.3             |
| Nucleus                | Carbon13            |

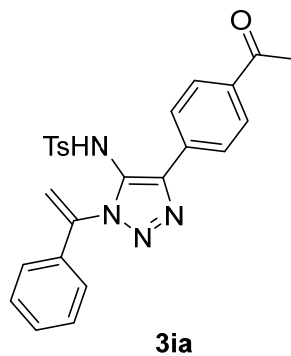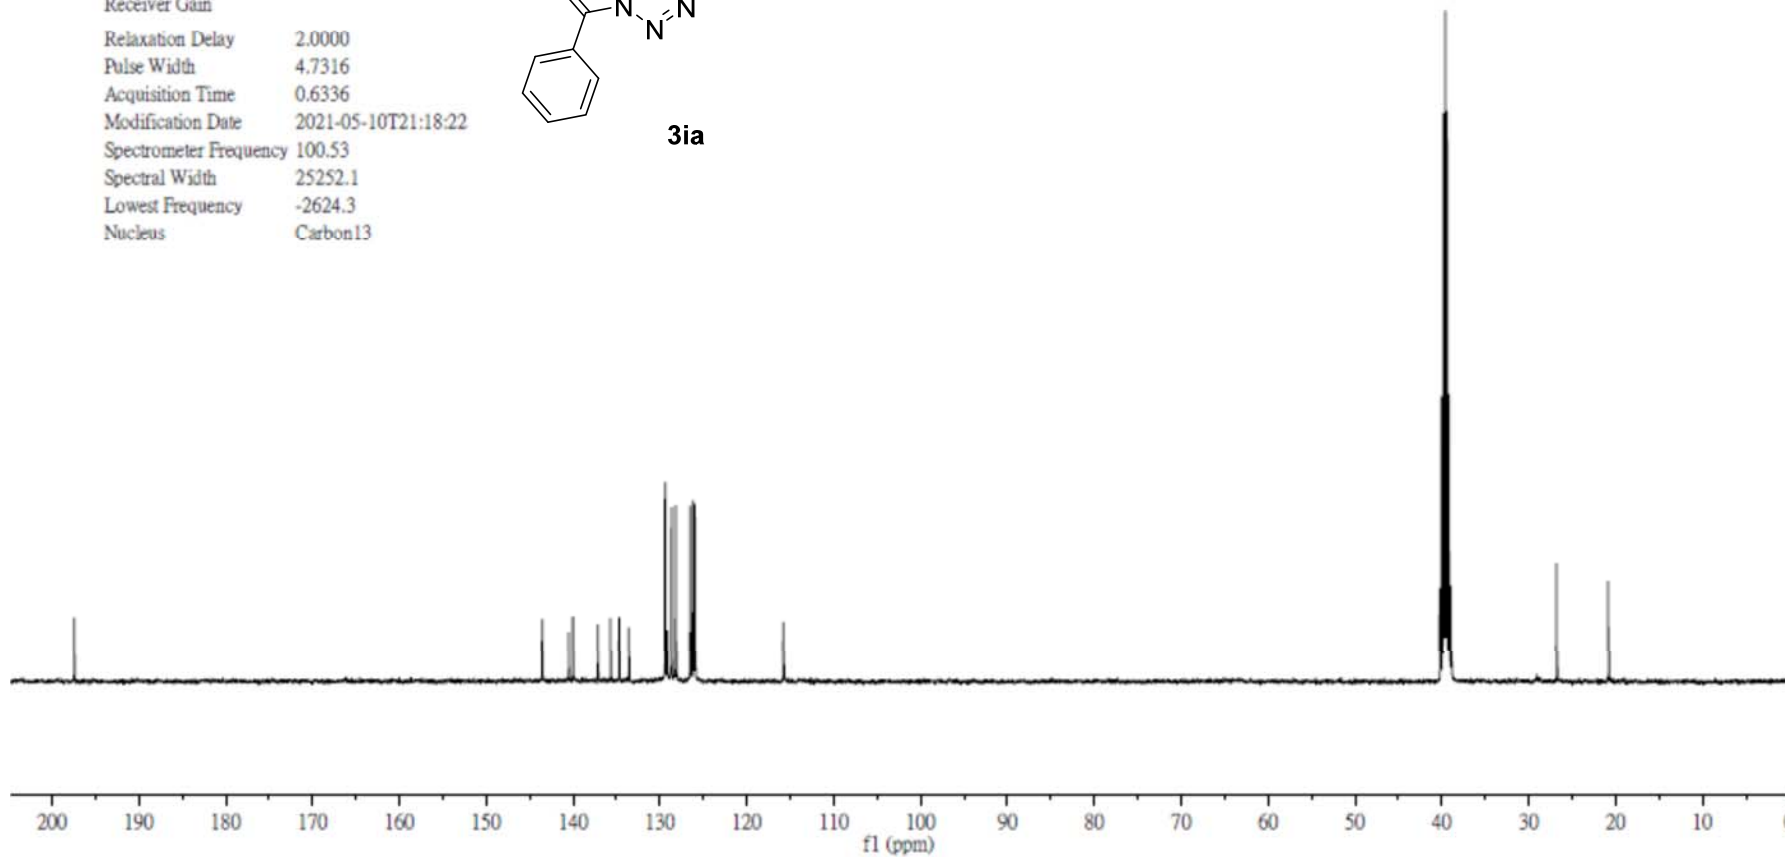

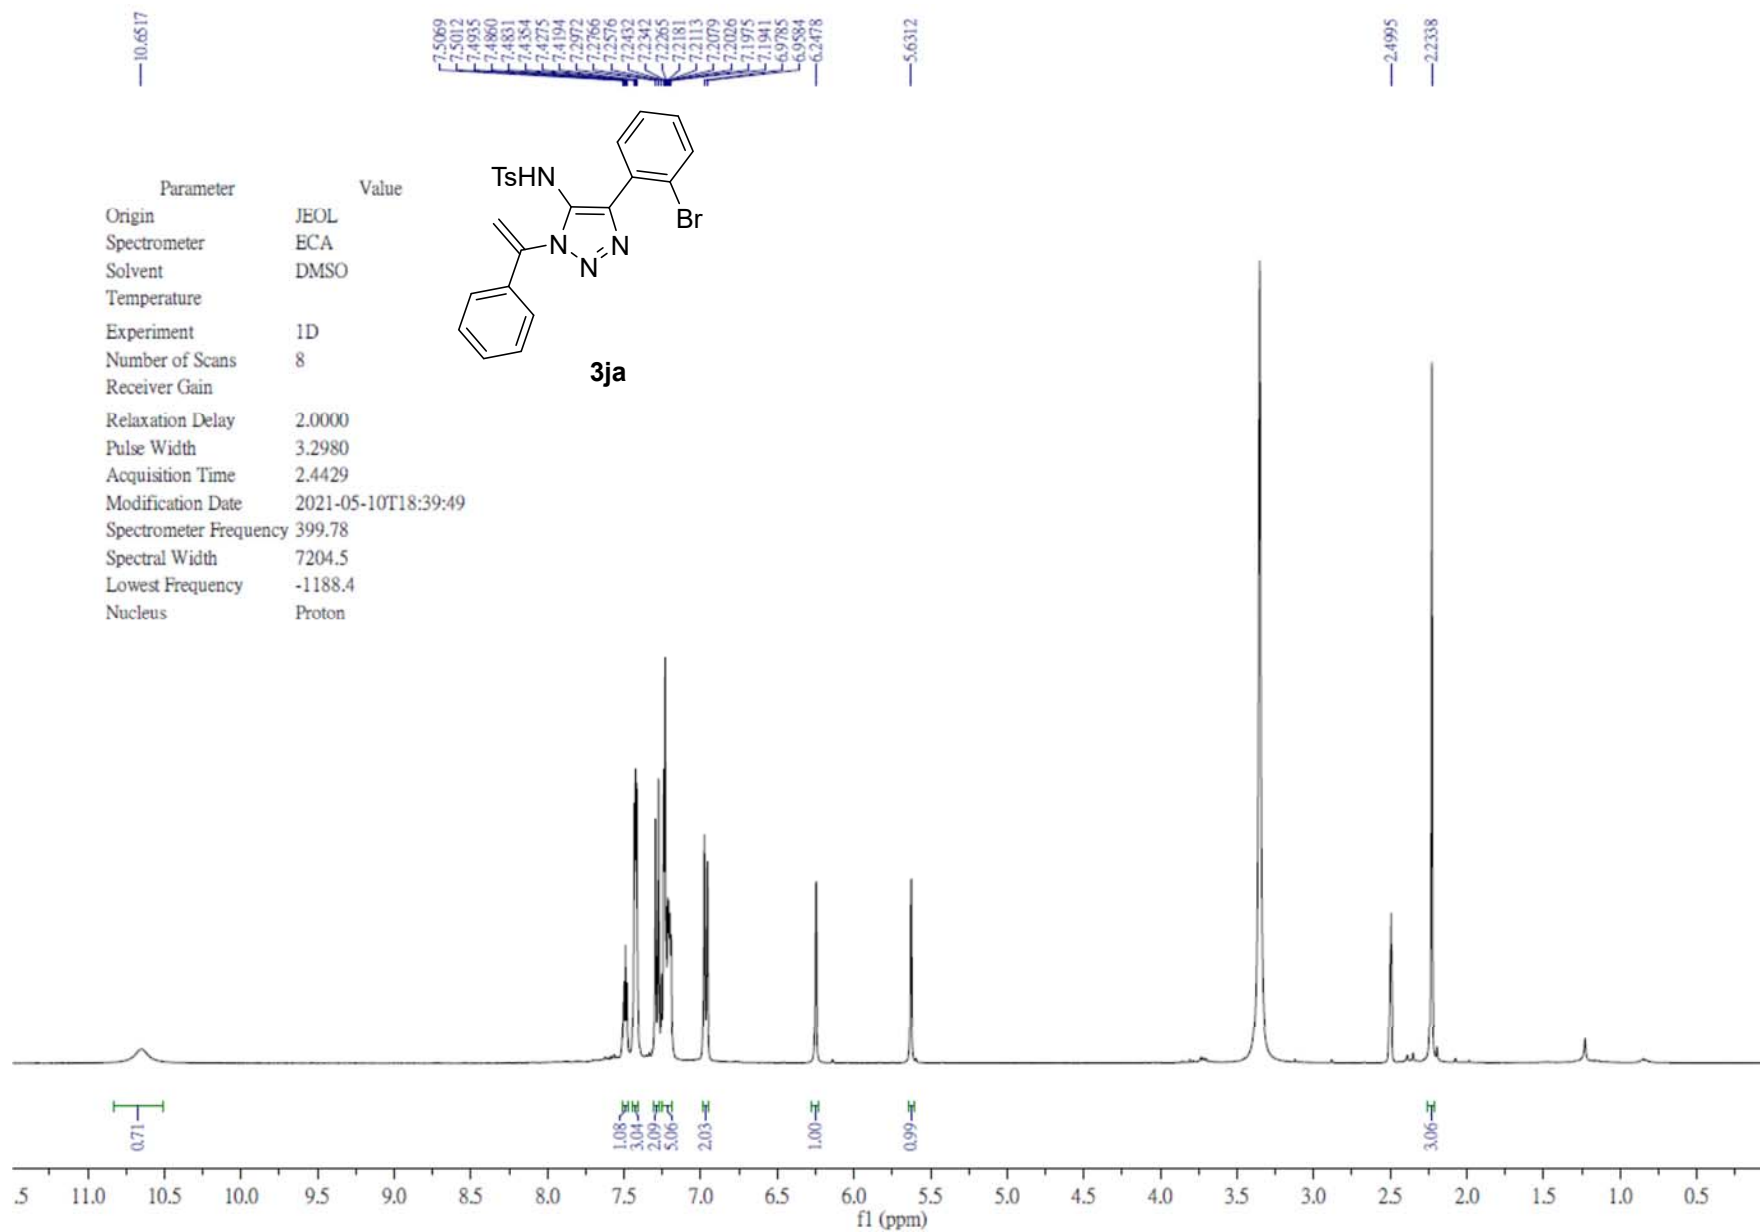

142.93  
141.53  
139.00  
136.08  
134.82  
132.75  
131.76  
130.12  
129.74  
129.32  
129.26  
128.62  
127.27  
126.05  
125.82  
122.91  
115.73

40.15  
39.94  
39.73  
39.52  
39.31  
39.10  
38.89

20.96

| Parameter              | Value               |
|------------------------|---------------------|
| Origin                 | JEOL                |
| Spectrometer           | ECA                 |
| Solvent                | DMSO                |
| Temperature            |                     |
| Experiment             | 1D                  |
| Number of Scans        | 823                 |
| Receiver Gain          |                     |
| Relaxation Delay       | 2.0000              |
| Pulse Width            | 4.7316              |
| Acquisition Time       | 0.6336              |
| Modification Date      | 2021-05-10T21:24:28 |
| Spectrometer Frequency | 100.53              |
| Spectral Width         | 25252.1             |
| Lowest Frequency       | -2625.3             |
| Nucleus                | Carbon13            |

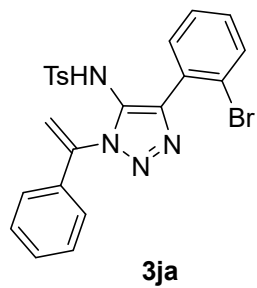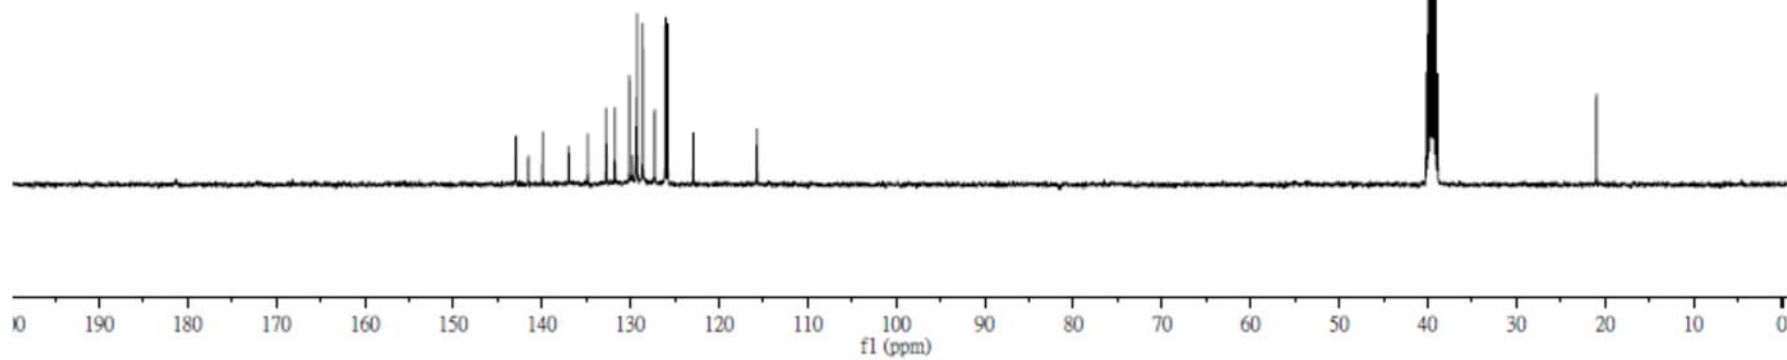

10.7254

7.4604  
7.4392  
7.4285  
7.4223  
7.4137  
7.3834  
7.3623  
7.2521  
7.2049  
7.2280  
7.2147  
7.0147  
6.9947

6.1971

5.6309

2.5001

2.2547

| Parameter              | Value               |
|------------------------|---------------------|
| Origin                 | JEOL                |
| Spectrometer           | ECA                 |
| Solvent                | DMSO                |
| Temperature            |                     |
| Experiment             | 1D                  |
| Number of Scans        | 8                   |
| Receiver Gain          |                     |
| Relaxation Delay       | 2.0000              |
| Pulse Width            | 3.2980              |
| Acquisition Time       | 2.4429              |
| Modification Date      | 2021-05-06T14:24:08 |
| Spectrometer Frequency | 399.78              |
| Spectral Width         | 7204.5              |
| Lowest Frequency       | -1188.0             |
| Nucleus                | Proton              |

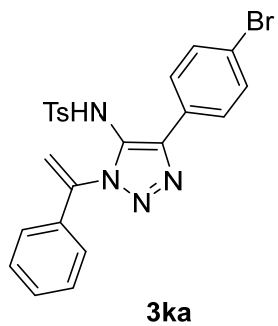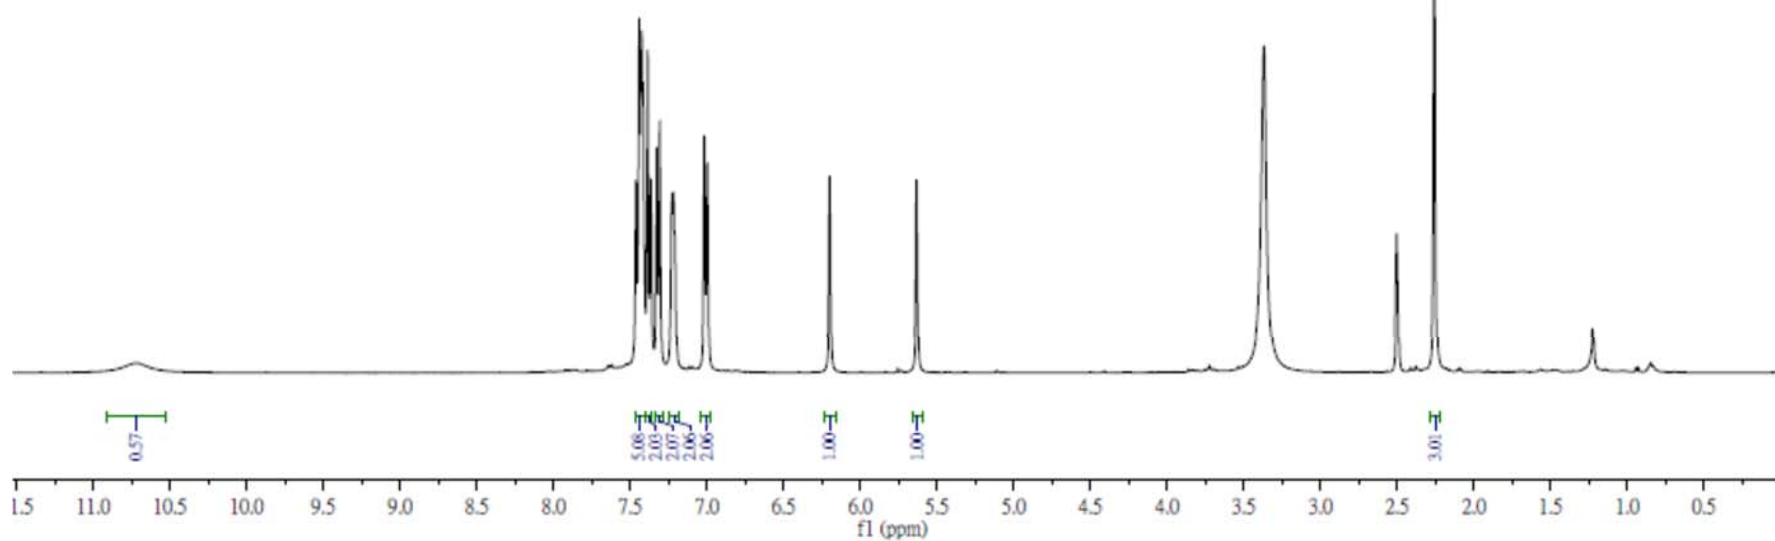

143.70  
140.51  
140.03  
137.23  
134.73  
131.19  
129.33  
128.62  
128.48  
128.38  
128.09  
126.40  
125.96  
121.32  
115.66

40.15  
39.94  
39.73  
39.52  
39.31  
38.89

21.07

| Parameter              | Value               |
|------------------------|---------------------|
| Origin                 | JEOL                |
| Spectrometer           | ECA                 |
| Solvent                | DMSO                |
| Temperature            |                     |
| Experiment             | 1D                  |
| Number of Scans        | 787                 |
| Receiver Gain          |                     |
| Relaxation Delay       | 2.0000              |
| Pulse Width            | 4.7316              |
| Acquisition Time       | 0.6336              |
| Modification Date      | 2021-05-10T23:45:14 |
| Spectrometer Frequency | 100.53              |
| Spectral Width         | 25252.1             |
| Lowest Frequency       | -2623.8             |
| Nucleus                | Carbon13            |

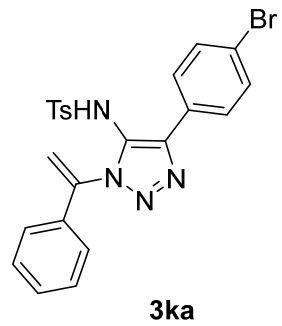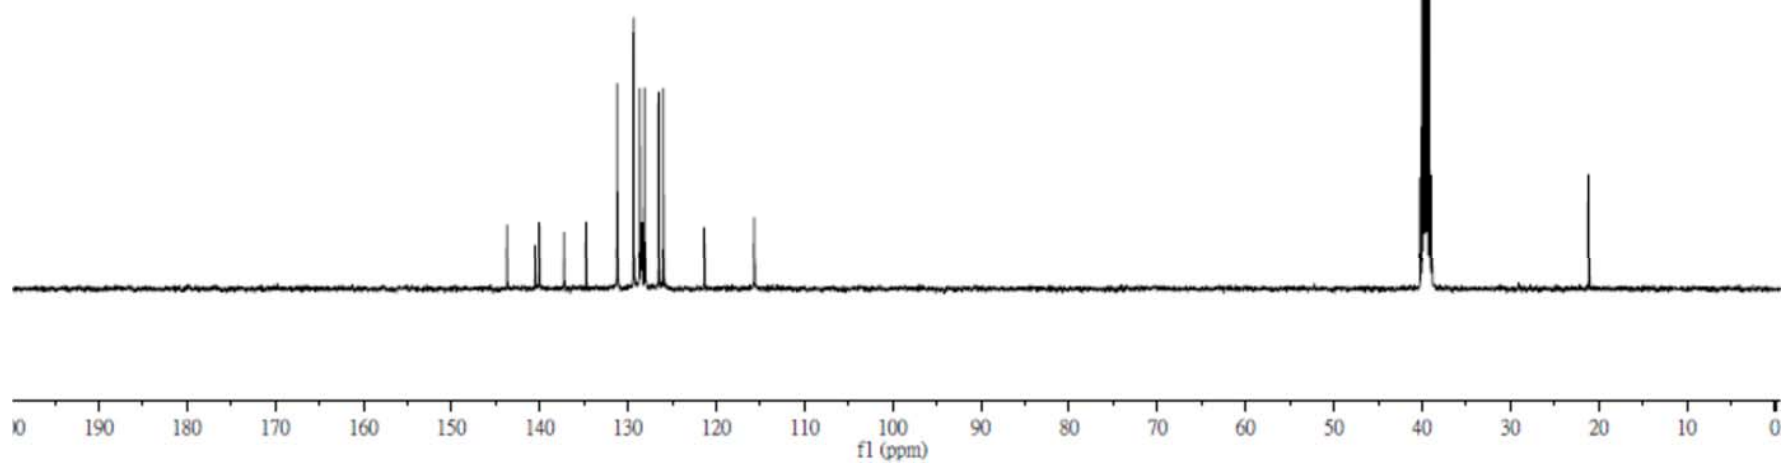

| Parameter              | Value               |
|------------------------|---------------------|
| Origin                 | JEOL                |
| Spectrometer           | ECA                 |
| Solvent                | DMSO                |
| Temperature            |                     |
| Experiment             | 1D                  |
| Number of Scans        | 8                   |
| Receiver Gain          |                     |
| Relaxation Delay       | 2.0000              |
| Pulse Width            | 3.2980              |
| Acquisition Time       | 2.4429              |
| Modification Date      | 2021-05-10T19:00:40 |
| Spectrometer Frequency | 399.78              |
| Spectral Width         | 7204.5              |
| Lowest Frequency       | -1188.0             |
| Nucleus                | Proton              |

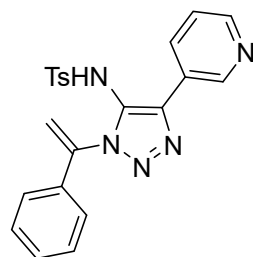

**3la**

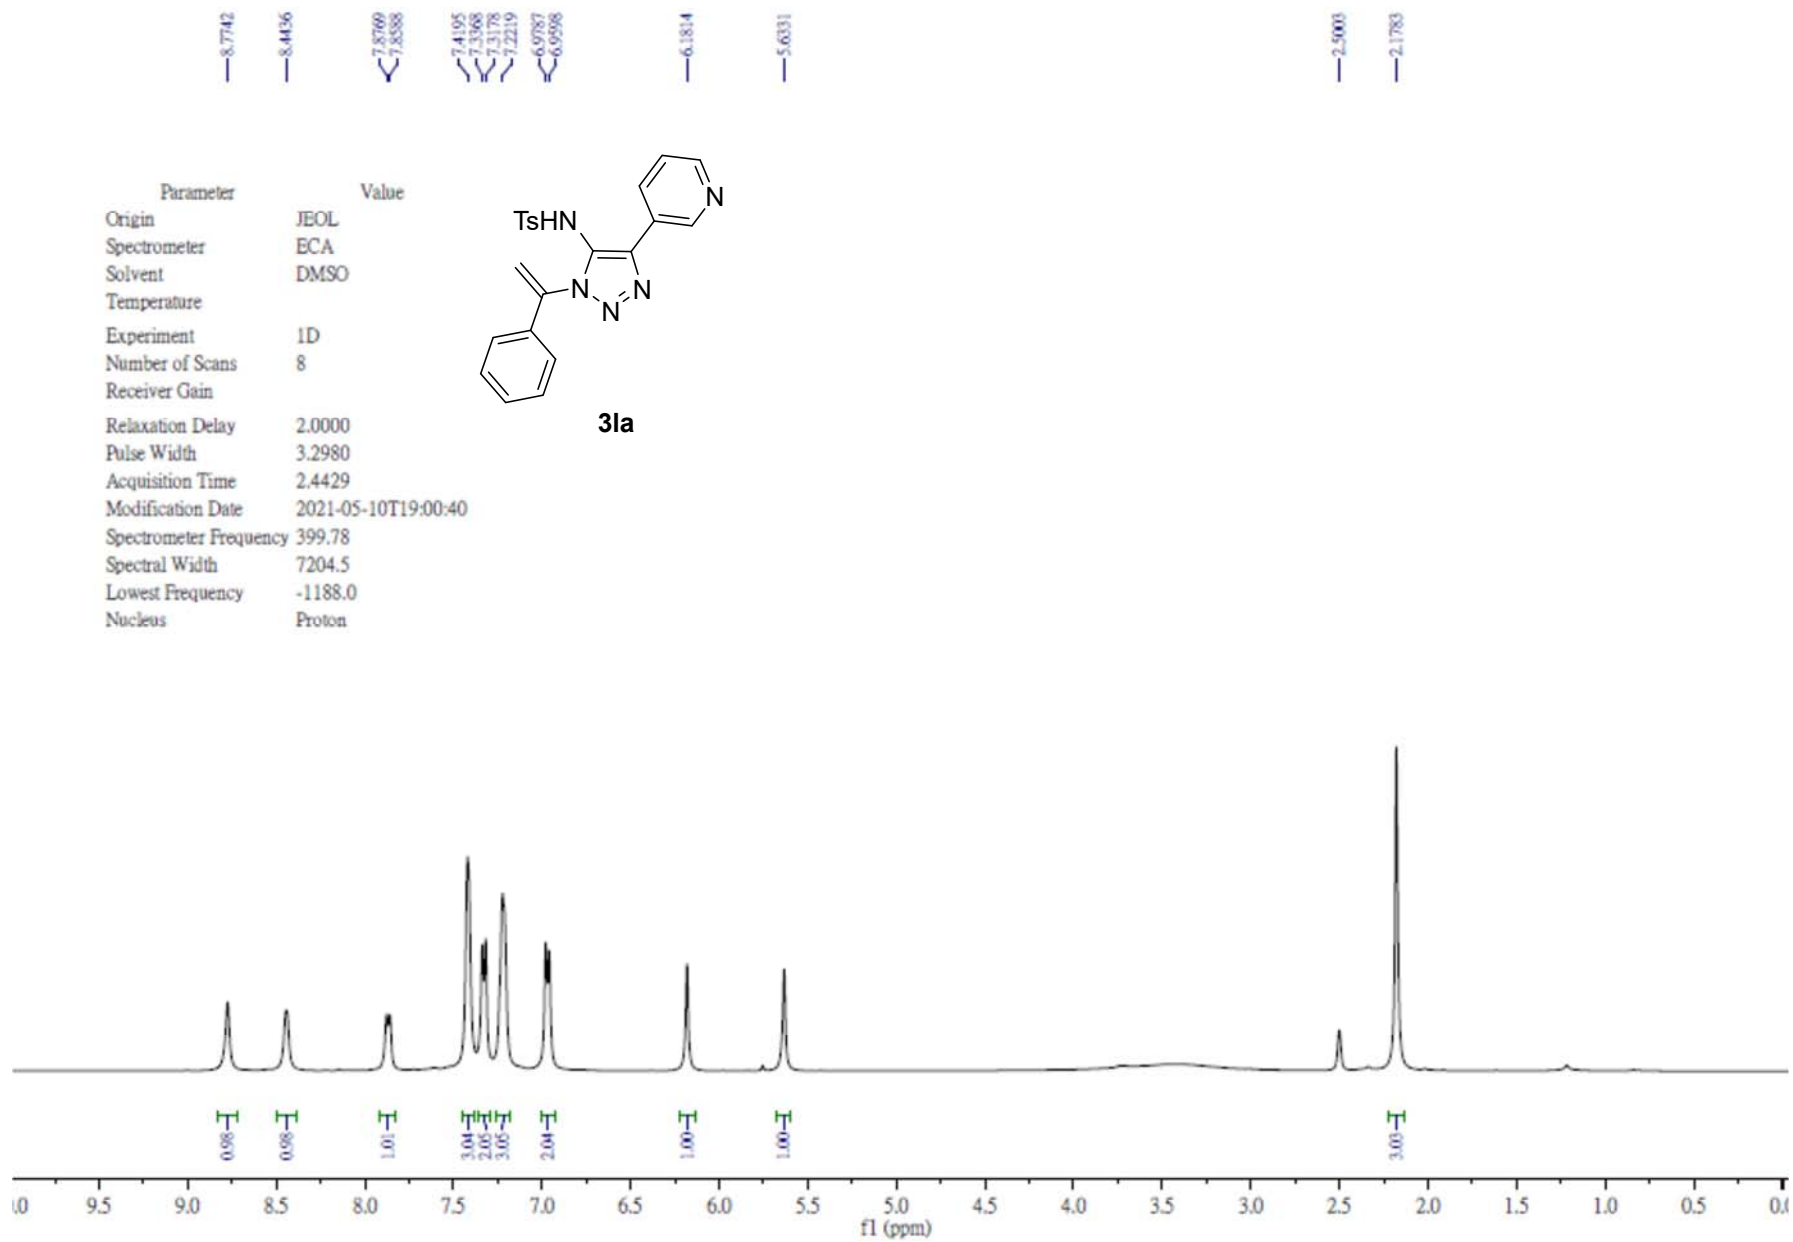

148.53  
146.95  
143.47  
140.05  
139.01  
136.86  
134.67  
133.32  
129.41  
129.31  
129.25  
128.61  
126.45  
125.94  
123.32  
115.66

40.15  
39.94  
39.73  
39.52  
39.31  
39.10  
38.89

20.88

| Parameter              | Value               |
|------------------------|---------------------|
| Origin                 | JEOL                |
| Spectrometer           | ECA                 |
| Solvent                | DMSO                |
| Temperature            |                     |
| Experiment             | 1D                  |
| Number of Scans        | 763                 |
| Receiver Gain          |                     |
| Relaxation Delay       | 2.0000              |
| Pulse Width            | 4.7316              |
| Acquisition Time       | 0.6336              |
| Modification Date      | 2021-05-10T23:44:17 |
| Spectrometer Frequency | 100.53              |
| Spectral Width         | 25252.1             |
| Lowest Frequency       | -2624.0             |
| Nucleus                | Carbon13            |

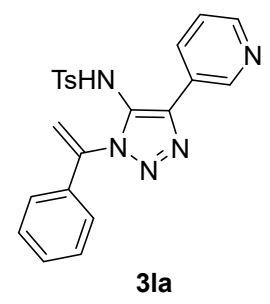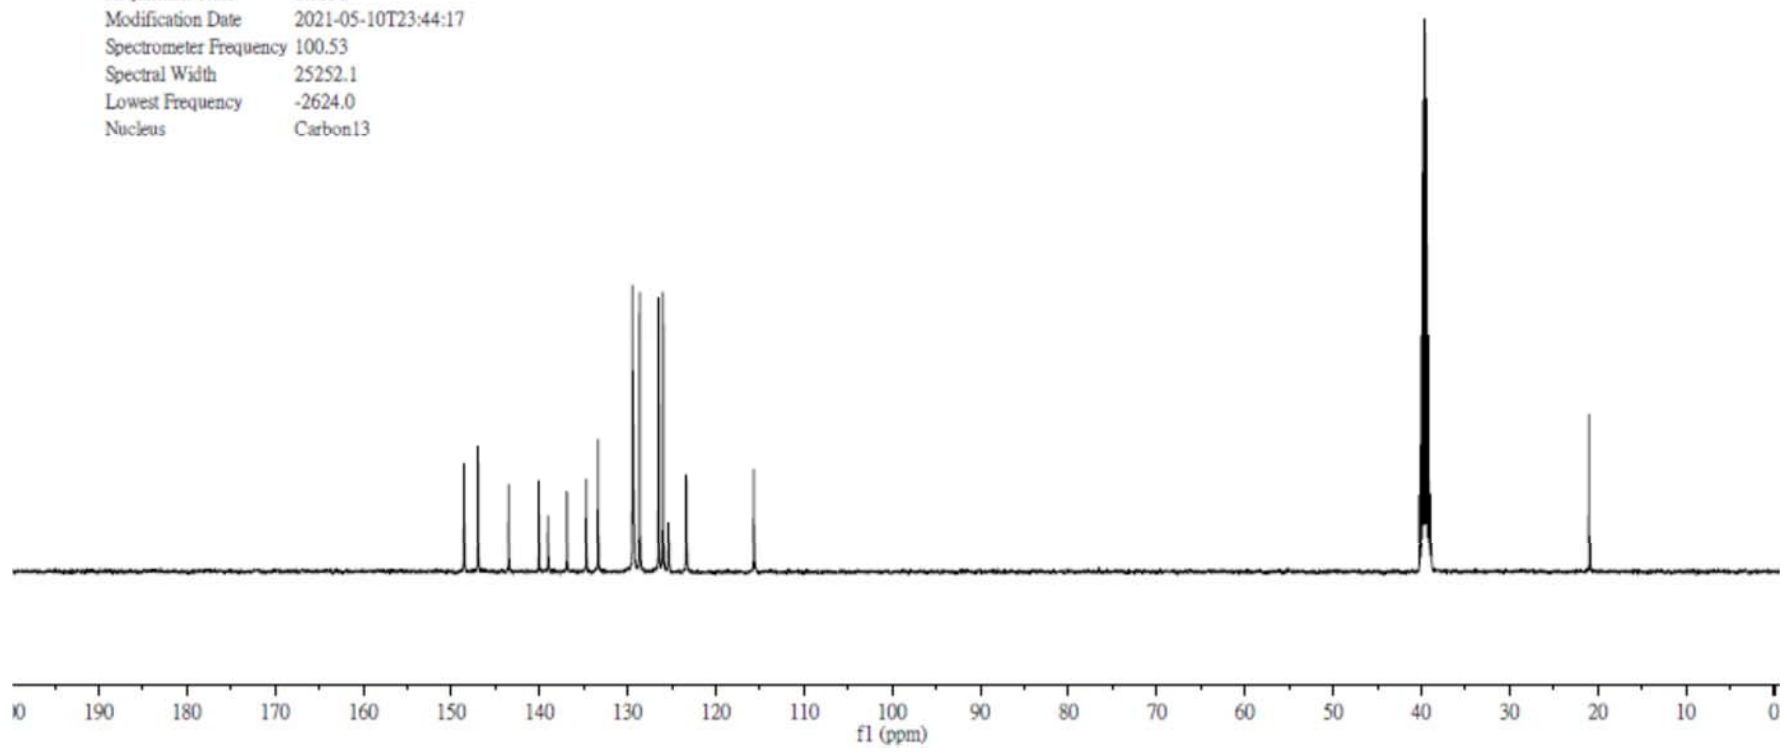



10.6941

8.1627  
7.5943  
7.5777  
7.4870  
7.4653  
7.3390  
7.3173  
7.2471  
7.2429  
7.2369  
7.2184  
7.2084  
7.2031  
7.1916  
7.1867  
6.9924  
6.9842

5.6342

2.4999

2.1927

| Parameter              | Value               |
|------------------------|---------------------|
| Origin                 | JEOL                |
| Spectrometer           | ECA                 |
| Solvent                | DMSO                |
| Temperature            |                     |
| Experiment             | 1D                  |
| Number of Scans        | 8                   |
| Receiver Gain          |                     |
| Relaxation Delay       | 2.0000              |
| Pulse Width            | 3.1850              |
| Acquisition Time       | 2.4429              |
| Modification Date      | 2021-03-30T14:53:03 |
| Spectrometer Frequency | 399.78              |
| Spectral Width         | 9005.8              |
| Lowest Frequency       | -2088.6             |
| Nucleus                | Proton              |

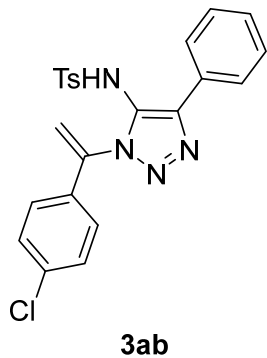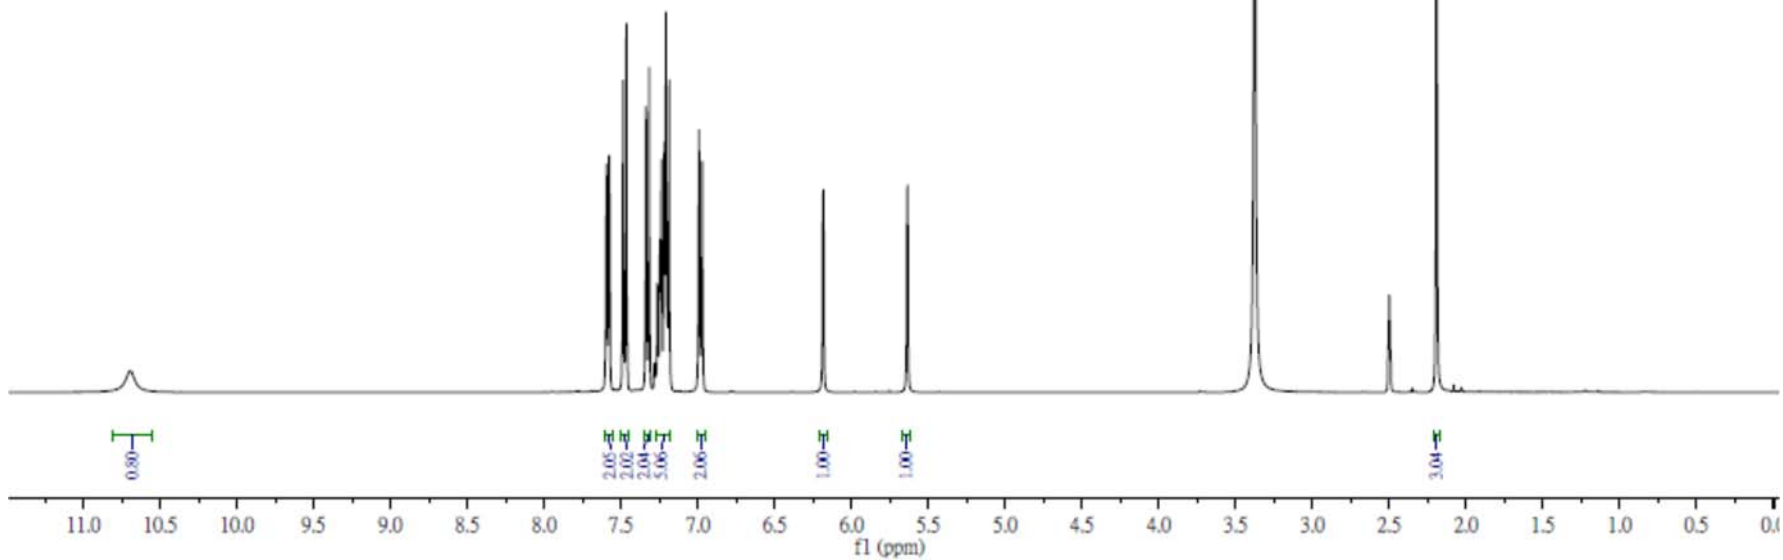

143.47  
141.61  
138.97  
137.03  
133.97  
133.53  
129.37  
128.61  
128.27  
128.03  
127.86  
127.80  
126.47  
126.14

40.15  
39.94  
39.73  
39.52  
39.31  
38.89

20.92

| Parameter              | Value               |
|------------------------|---------------------|
| Origin                 | JEOL                |
| Spectrometer           | ECA                 |
| Solvent                | DMSO                |
| Temperature            |                     |
| Experiment             | 1D                  |
| Number of Scans        | 666                 |
| Receiver Gain          |                     |
| Relaxation Delay       | 2.0000              |
| Pulse Width            | 4.6800              |
| Acquisition Time       | 0.6336              |
| Modification Date      | 2021-04-26T16:18:42 |
| Spectrometer Frequency | 100.53              |
| Spectral Width         | 25252.1             |
| Lowest Frequency       | -2623.4             |
| Nucleus                | Carbon13            |

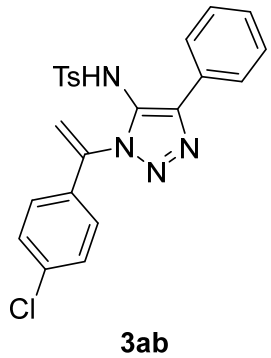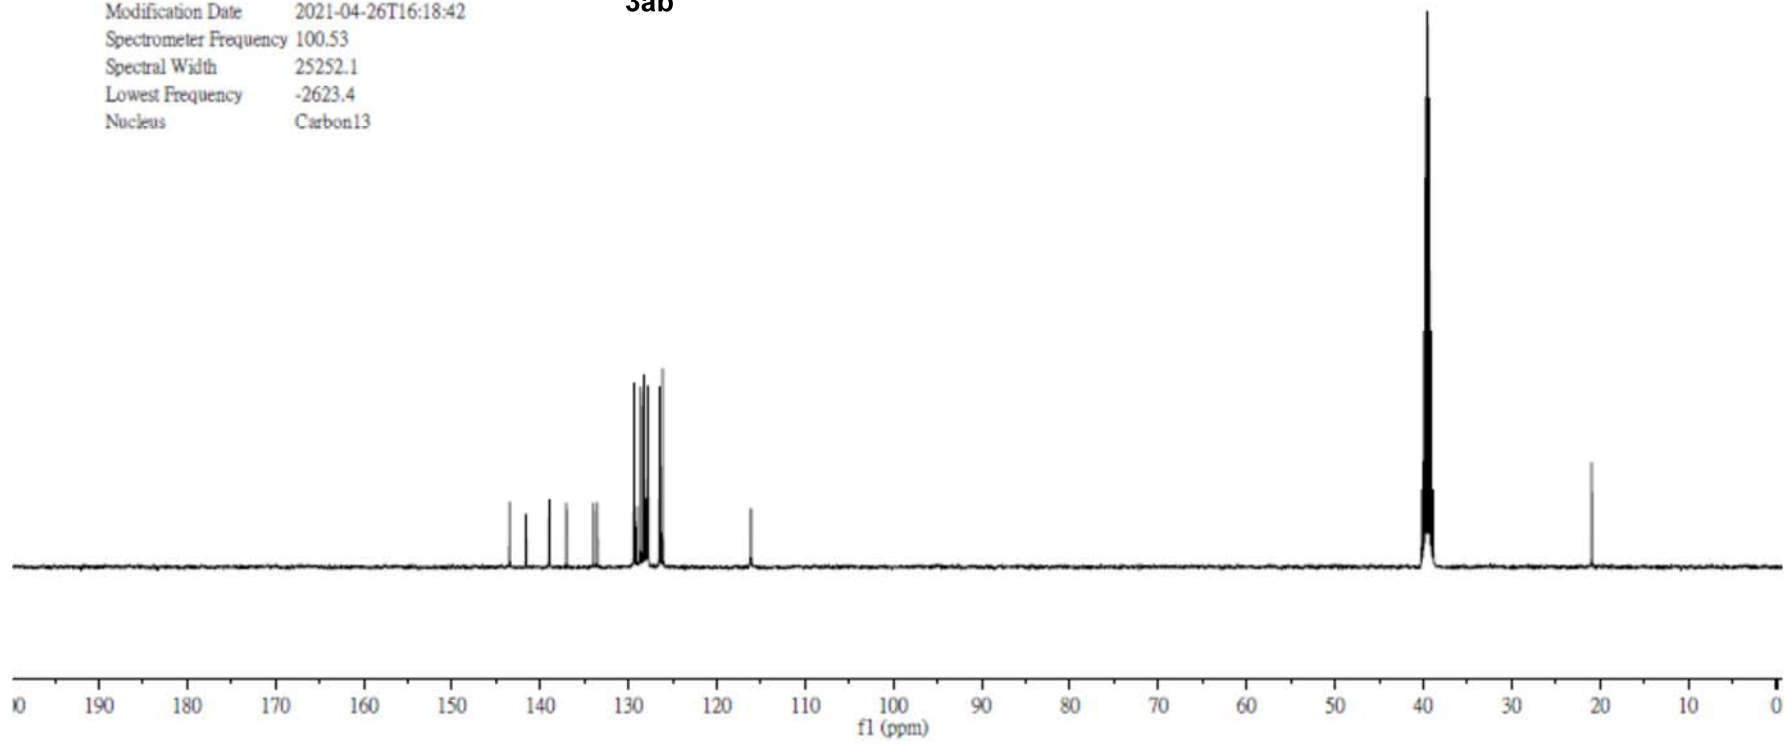

| Parameter              | Value               |
|------------------------|---------------------|
| Origin                 | JEOL                |
| Spectrometer           | ECA                 |
| Solvent                | DMSO                |
| Temperature            |                     |
| Experiment             | 1D                  |
| Number of Scans        | 8                   |
| Receiver Gain          |                     |
| Relaxation Delay       | 2.0000              |
| Pulse Width            | 3.2980              |
| Acquisition Time       | 2.4429              |
| Modification Date      | 2021-05-10T19:12:14 |
| Spectrometer Frequency | 399.78              |
| Spectral Width         | 7204.5              |
| Lowest Frequency       | -1188.0             |
| Nucleus                | Proton              |

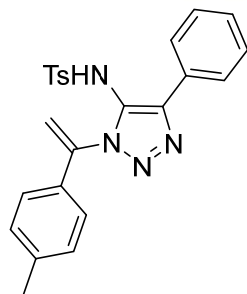

**3ac**

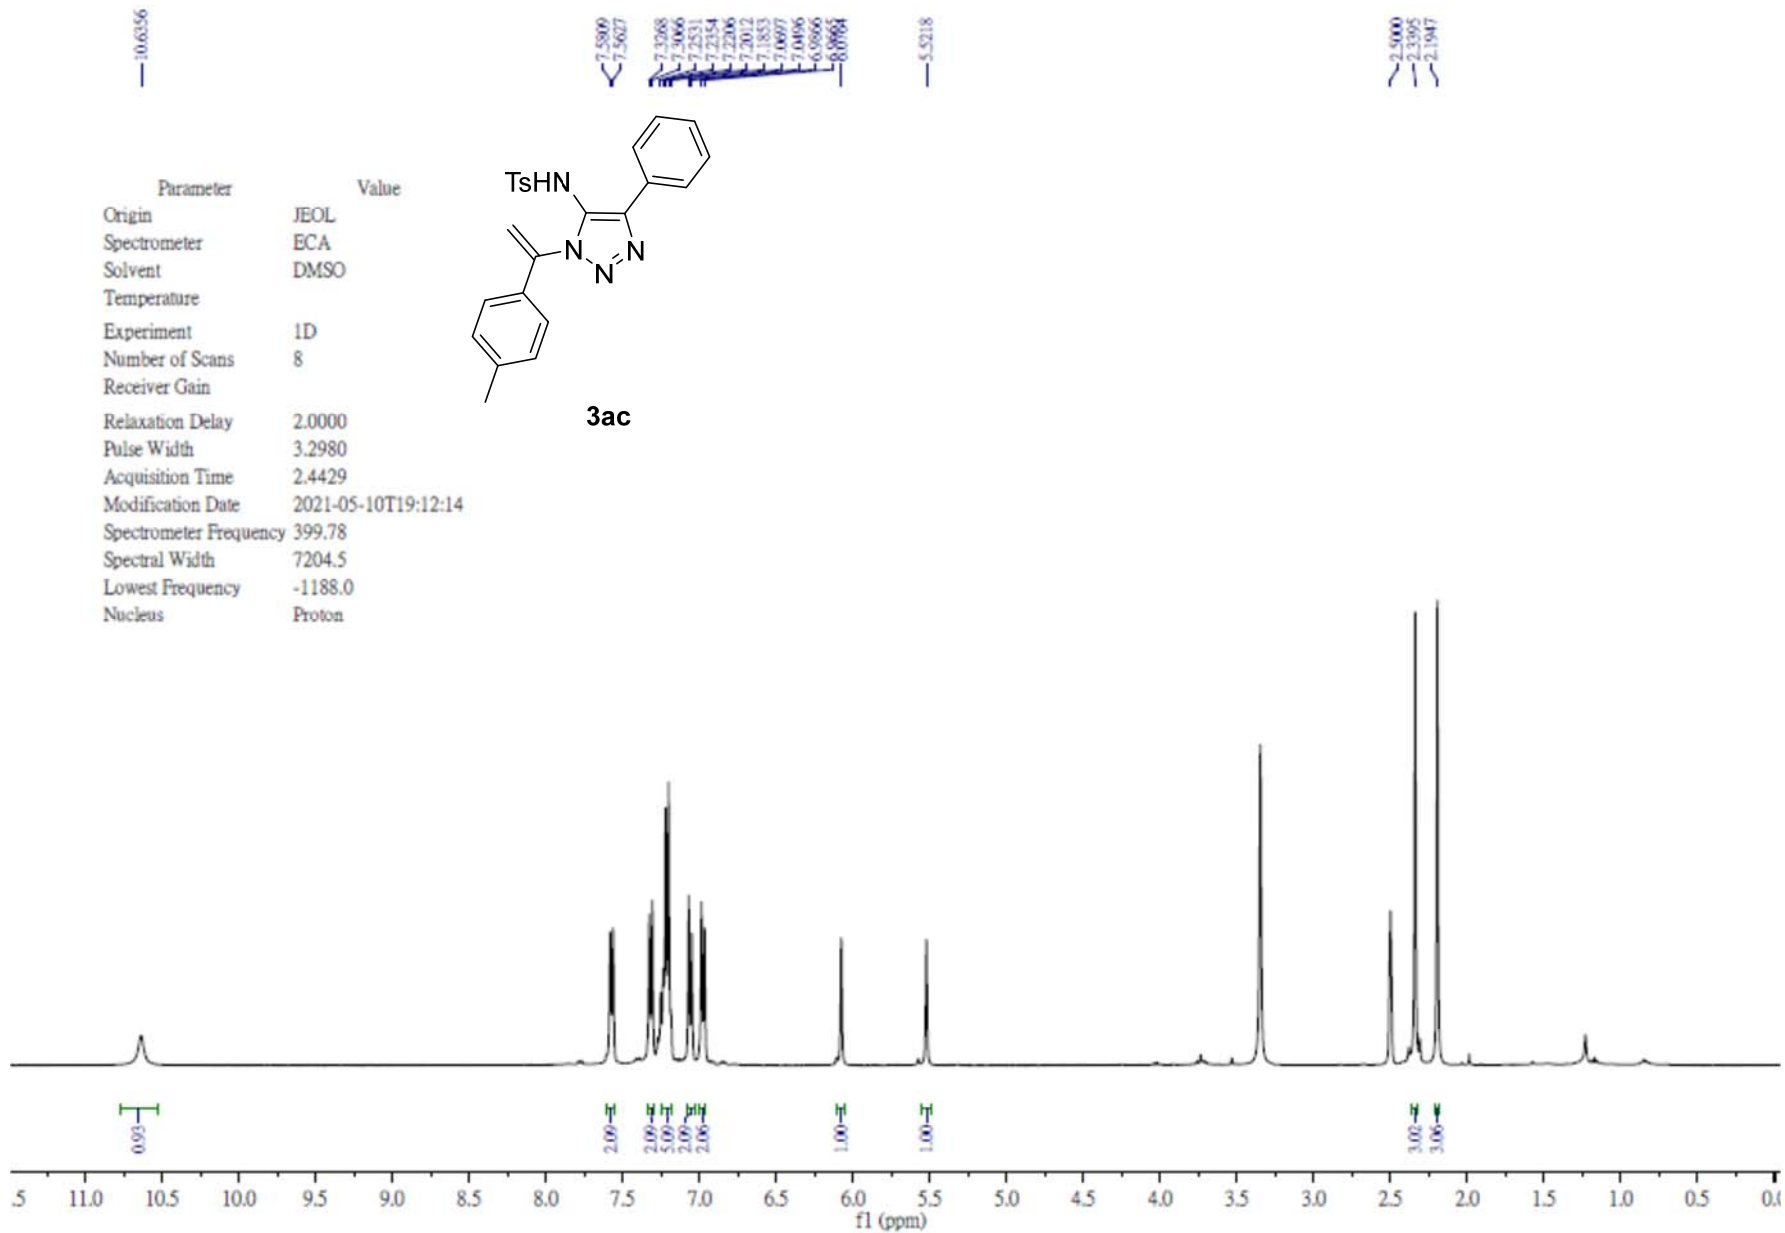

| Parameter              | Value               |
|------------------------|---------------------|
| Origin                 | JEOL                |
| Spectrometer           | ECA                 |
| Solvent                | DMSO                |
| Temperature            |                     |
| Experiment             | 1D                  |
| Number of Scans        | 860                 |
| Receiver Gain          |                     |
| Relaxation Delay       | 2.0000              |
| Pulse Width            | 4.7316              |
| Acquisition Time       | 0.6336              |
| Modification Date      | 2021-05-10T23:48:49 |
| Spectrometer Frequency | 100.53              |
| Spectral Width         | 25252.1             |
| Lowest Frequency       | -2624.8             |
| Nucleus                | Carbon13            |

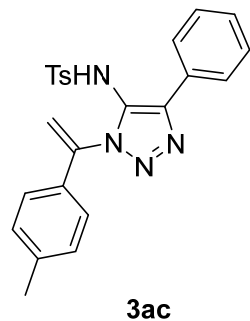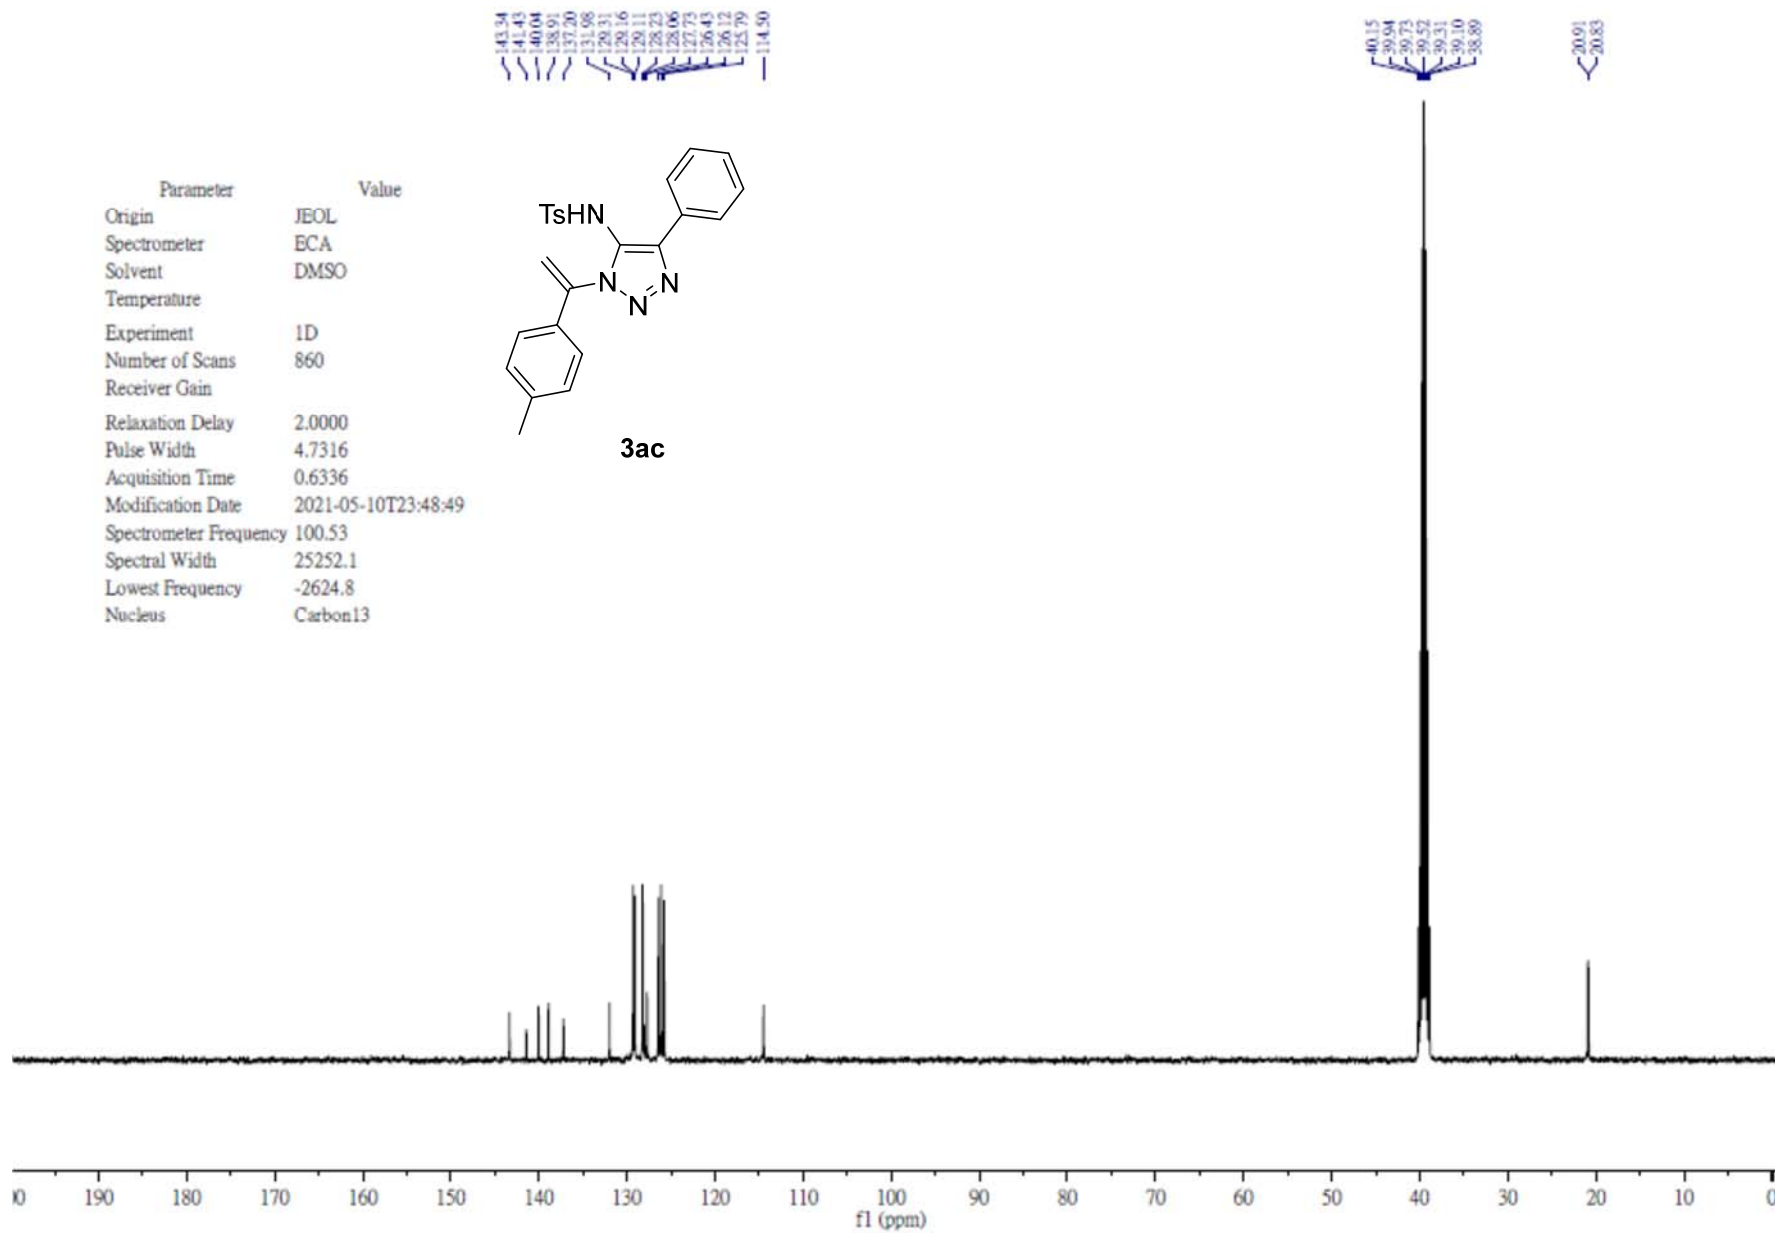

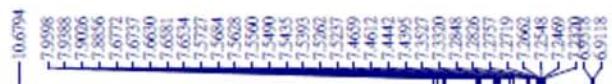

6.2857

5.7095

2.5085  
2.5041  
2.4996  
2.4950  
2.4907  
2.0996

| Parameter              | Value               |
|------------------------|---------------------|
| Origin                 | JEOL                |
| Spectrometer           | ECA                 |
| Solvent                | DMSO                |
| Temperature            |                     |
| Experiment             | 1D                  |
| Number of Scans        | 8                   |
| Receiver Gain          |                     |
| Relaxation Delay       | 2.0000              |
| Pulse Width            | 3.2980              |
| Acquisition Time       | 2.4429              |
| Modification Date      | 2021-04-20T18:46:58 |
| Spectrometer Frequency | 399.78              |
| Spectral Width         | 9005.8              |
| Lowest Frequency       | -2089.0             |
| Nucleus                | Proton              |

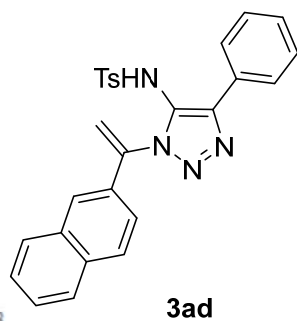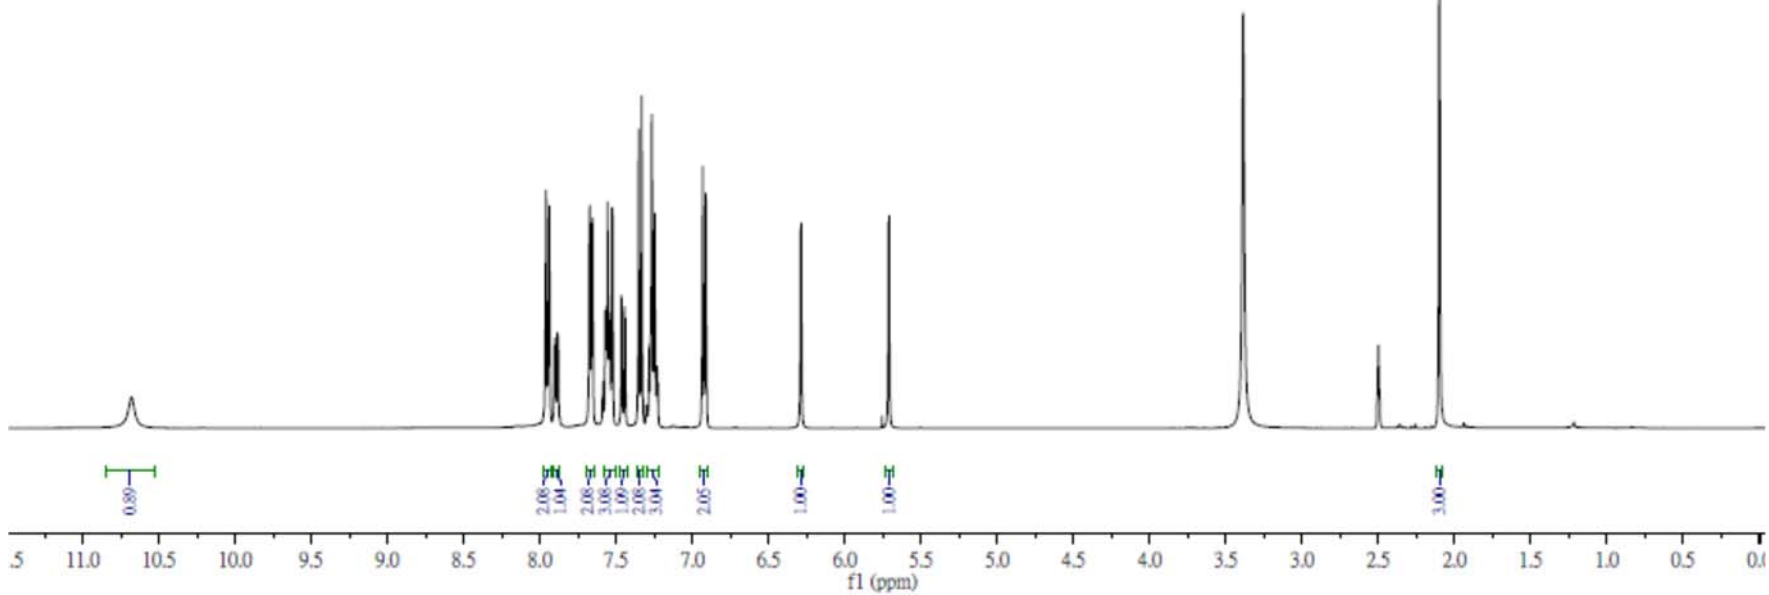

143.35  
141.64  
140.06  
137.12  
129.29  
128.56  
128.27  
128.19  
127.53  
126.73  
126.45  
126.18  
116.89

40.15  
39.04  
39.73  
39.52  
39.31  
39.10  
38.89

20.90

| Parameter              | Value               |
|------------------------|---------------------|
| Origin                 | JEOL                |
| Spectrometer           | ECA                 |
| Solvent                | DMSO                |
| Temperature            |                     |
| Experiment             | 1D                  |
| Number of Scans        | 948                 |
| Receiver Gain          |                     |
| Relaxation Delay       | 2.0000              |
| Pulse Width            | 4.7316              |
| Acquisition Time       | 0.6336              |
| Modification Date      | 2021-05-10T23:49:57 |
| Spectrometer Frequency | 100.53              |
| Spectral Width         | 25252.1             |
| Lowest Frequency       | -2625.6             |
| Nucleus                | Carbon13            |

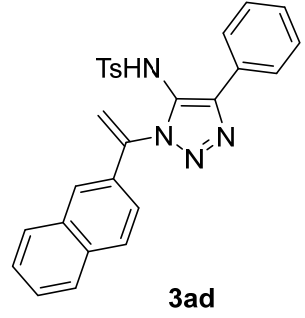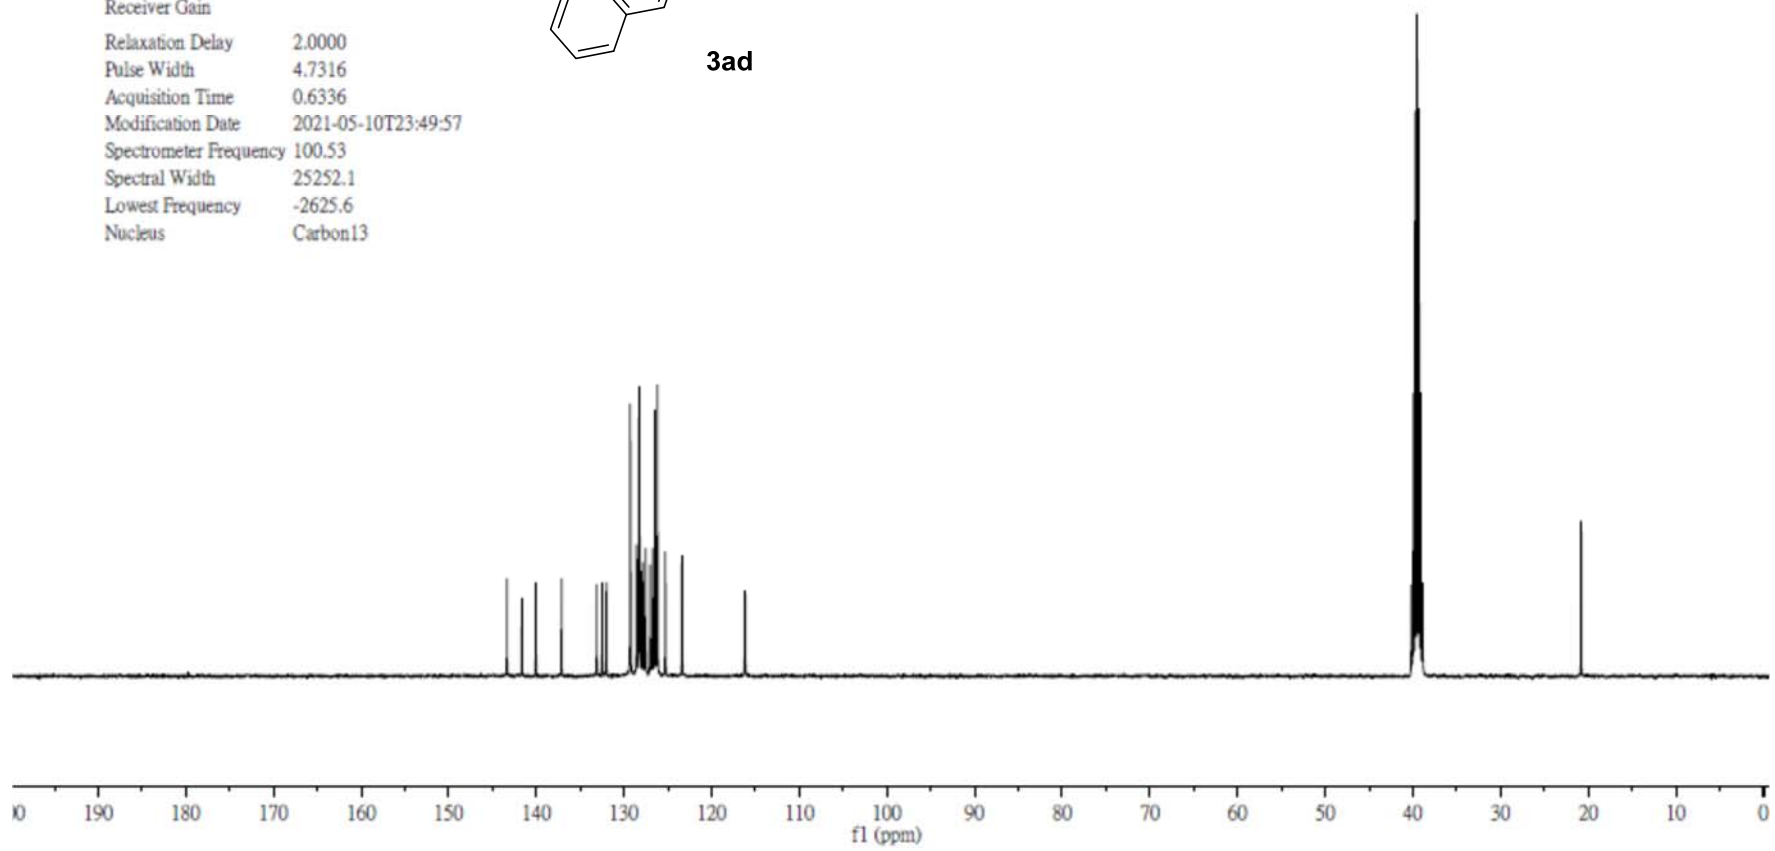

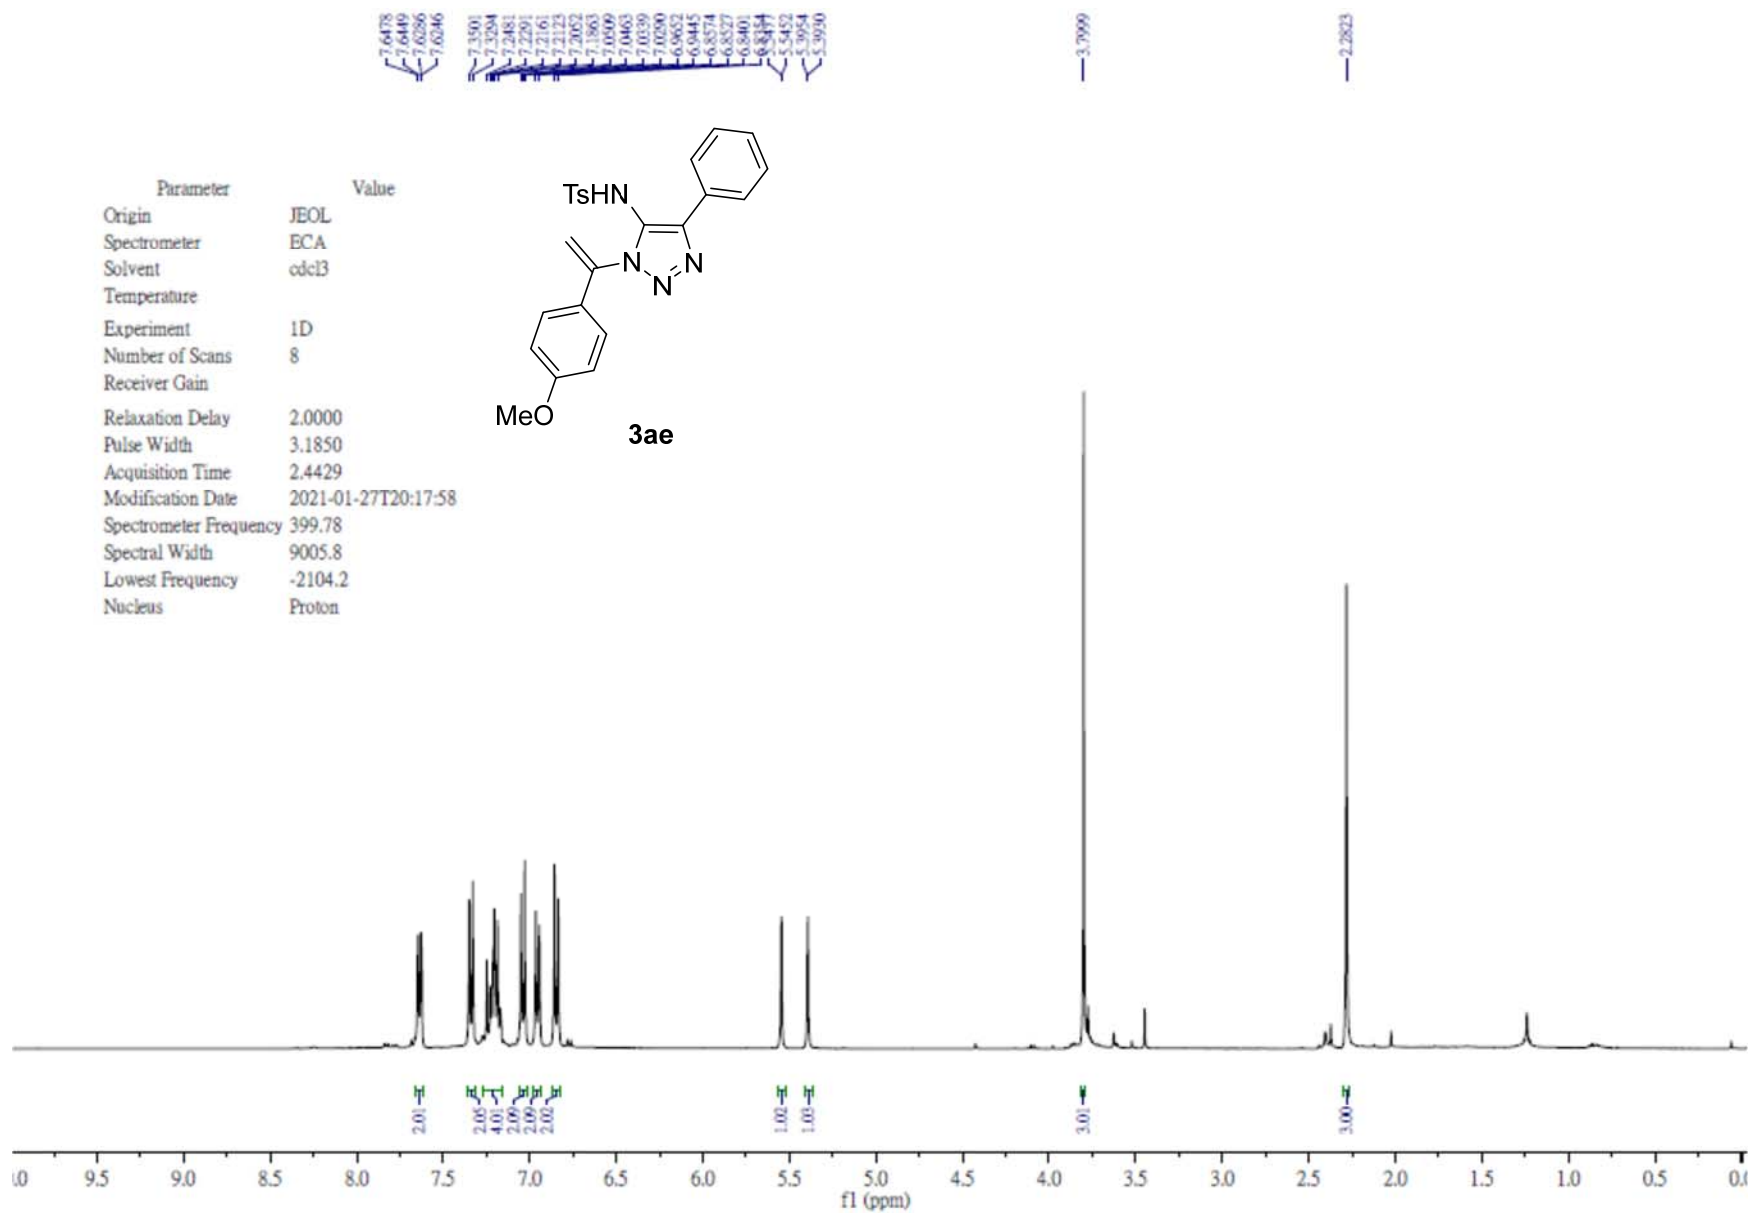

| Parameter              | Value               |
|------------------------|---------------------|
| Origin                 | JEOL                |
| Spectrometer           | ECA                 |
| Solvent                | cdcl3               |
| Temperature            |                     |
| Experiment             | 1D                  |
| Number of Scans        | 8                   |
| Receiver Gain          |                     |
| Relaxation Delay       | 2.0000              |
| Pulse Width            | 3.1850              |
| Acquisition Time       | 2.4429              |
| Modification Date      | 2021-01-27T20:17:58 |
| Spectrometer Frequency | 399.78              |
| Spectral Width         | 9005.8              |
| Lowest Frequency       | -2104.2             |
| Nucleus                | Proton              |

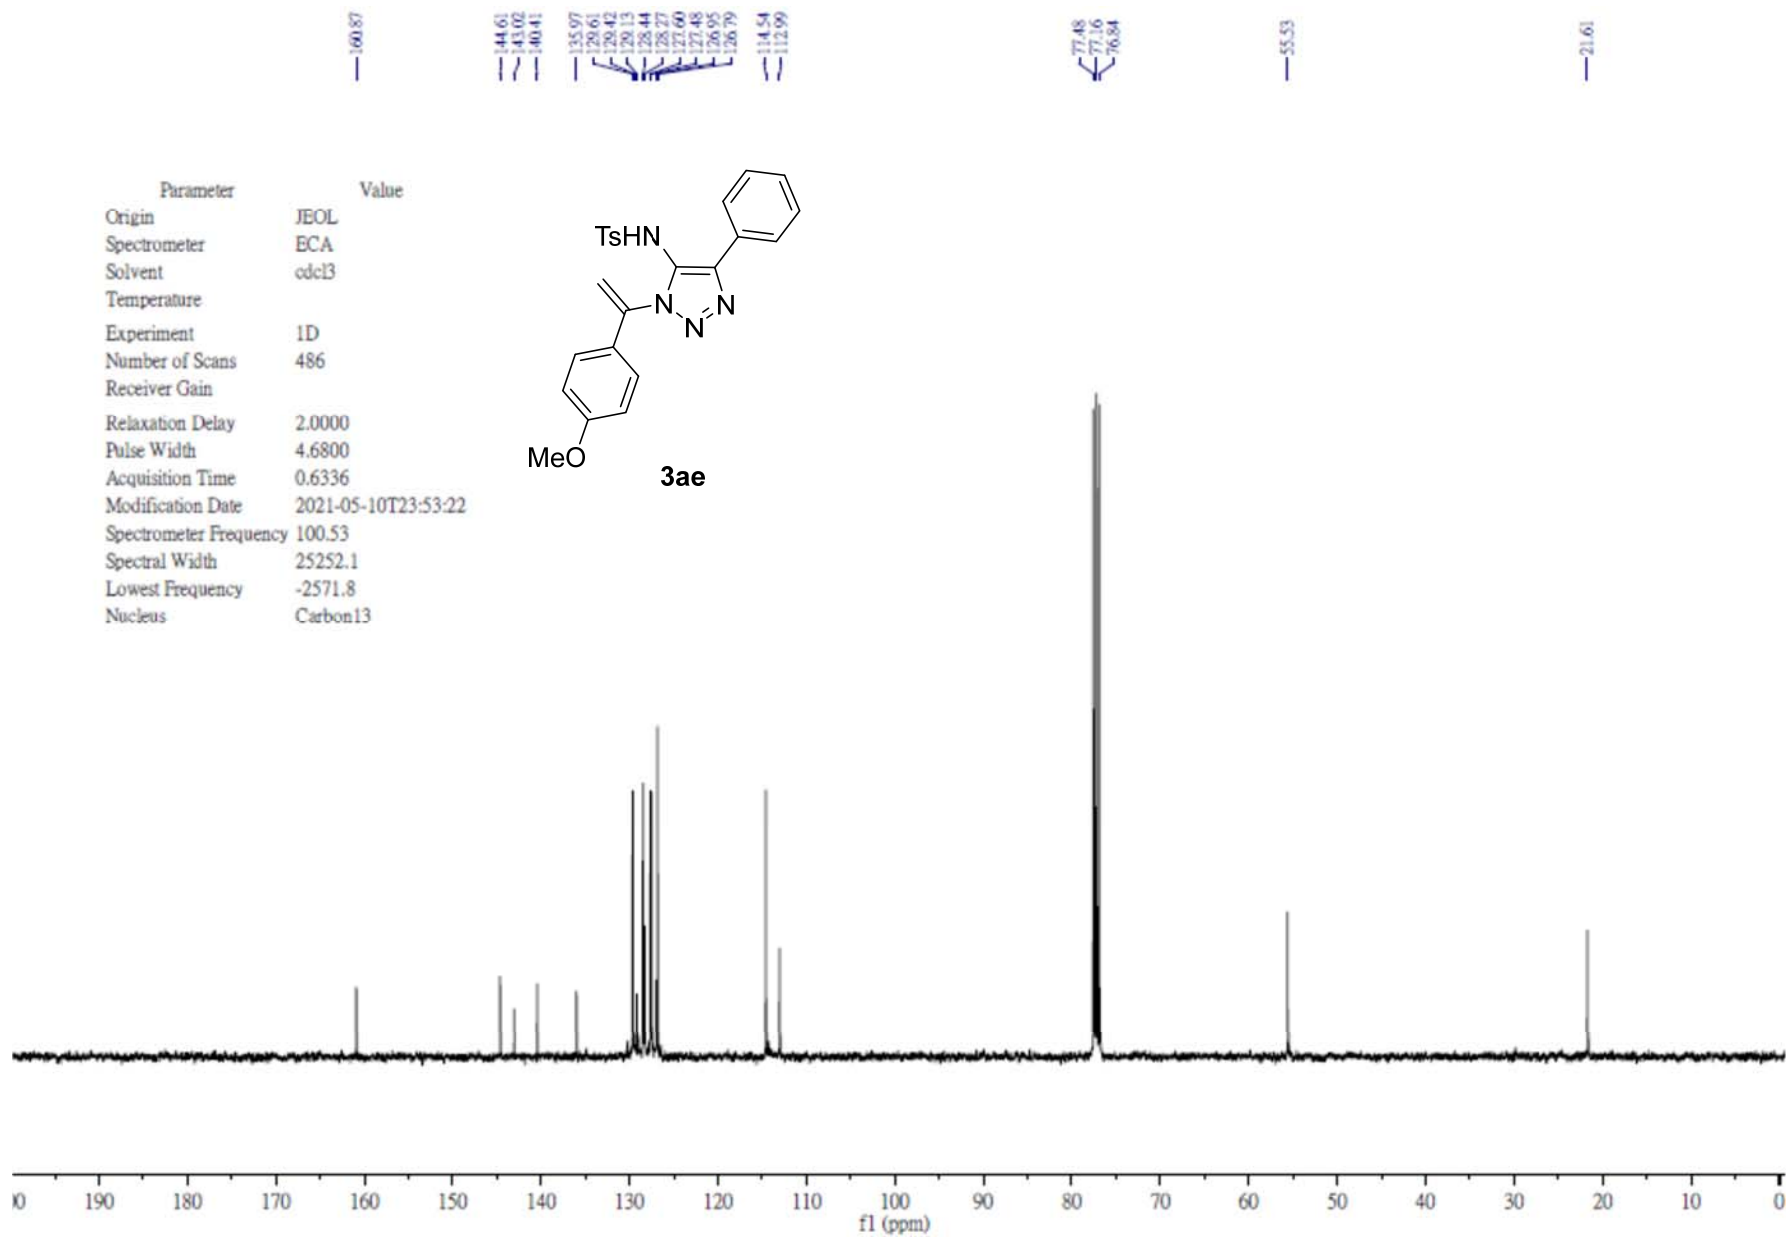



| Parameter              | Value               |
|------------------------|---------------------|
| Origin                 | JEOL                |
| Spectrometer           | ECA                 |
| Solvent                | DMSO                |
| Temperature            |                     |
| Experiment             | 1D                  |
| Number of Scans        | 8                   |
| Receiver Gain          |                     |
| Relaxation Delay       | 2.0000              |
| Pulse Width            | 3.2980              |
| Acquisition Time       | 2.4429              |
| Modification Date      | 2021-05-10T19:38:27 |
| Spectrometer Frequency | 399.78              |
| Spectral Width         | 7204.5              |
| Lowest Frequency       | -1188.0             |
| Nucleus                | Proton              |

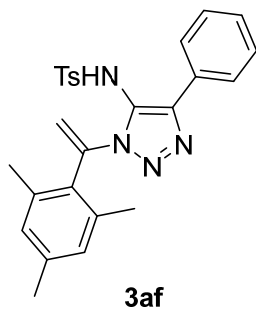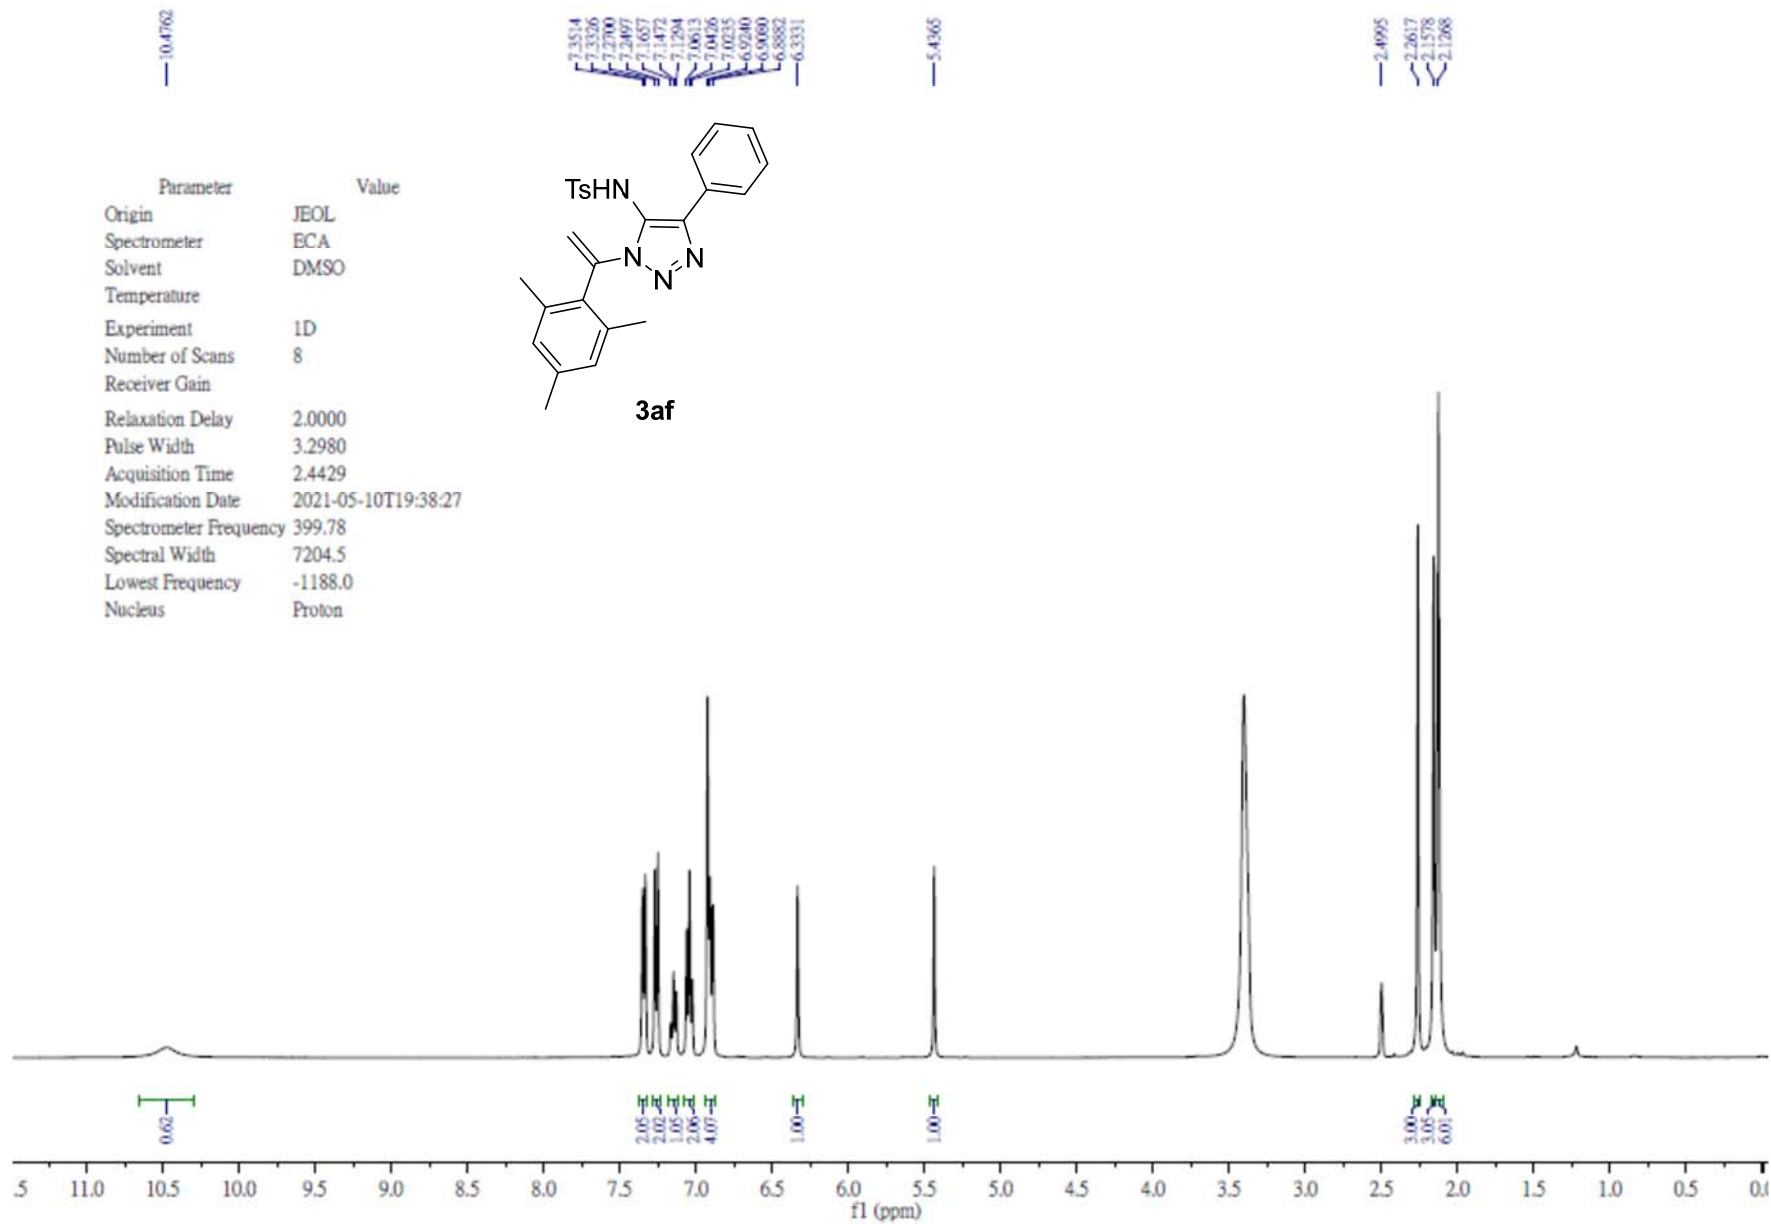

| Parameter              | Value               |
|------------------------|---------------------|
| Origin                 | JEOL                |
| Spectrometer           | ECA                 |
| Solvent                | DMSO                |
| Temperature            |                     |
| Experiment             | 1D                  |
| Number of Scans        | 553                 |
| Receiver Gain          |                     |
| Relaxation Delay       | 2.0000              |
| Pulse Width            | 4.7316              |
| Acquisition Time       | 0.6336              |
| Modification Date      | 2021-05-10T23:54:28 |
| Spectrometer Frequency | 100.53              |
| Spectral Width         | 25252.1             |
| Lowest Frequency       | -2620.8             |
| Nucleus                | Carbon13            |

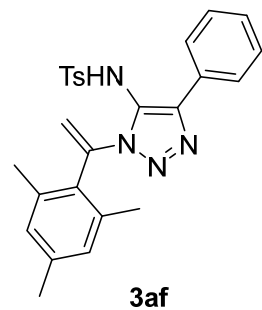

143.15  
142.16  
139.23  
137.68  
137.19  
136.67  
132.06  
129.30  
129.01  
128.62  
128.04  
127.54  
127.06  
126.47  
126.41  
114.62

40.15  
39.94  
39.73  
39.52  
39.31  
39.10  
38.89

20.90  
20.71  
19.81

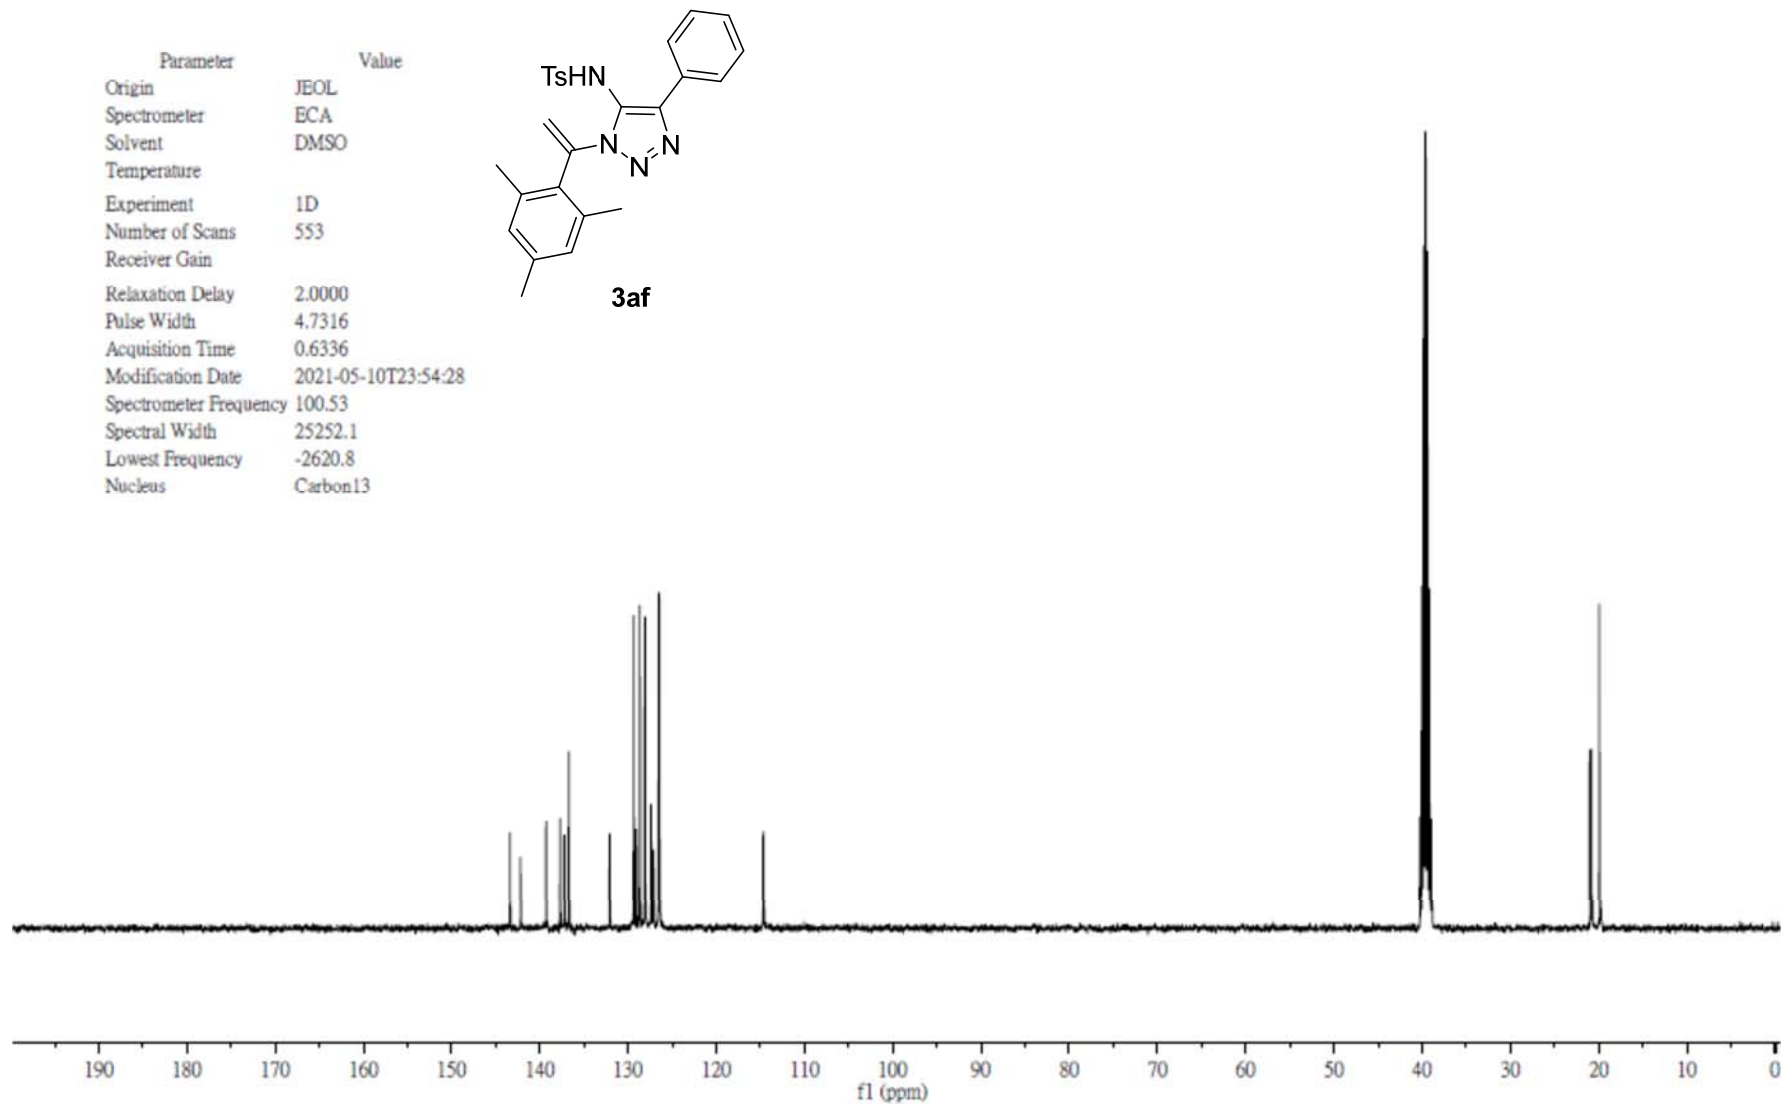

| Parameter              | Value   |
|------------------------|---------|
| Origin                 | Varian  |
| Spectrometer           | nmrs    |
| Solvent                | "cdcl3" |
| Temperature            | 20.0    |
| Pulse Sequence         | s2pul   |
| Experiment             | 1D      |
| Number of Scans        | 68      |
| Receiver Gain          | 30      |
| Relaxation Delay       | 1.0000  |
| Pulse Width            | 0.0000  |
| Acquisition Time       | 2.5559  |
| Spectrometer Frequency | 399.76  |
| Spectral Width         | 6410.3  |
| Lowest Frequency       | -806.6  |
| Nucleus                | 1H      |

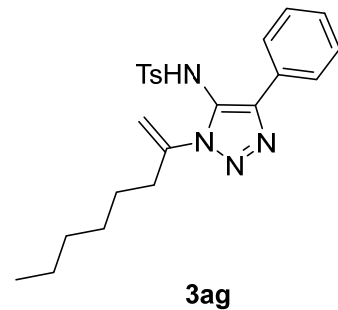

7.3774  
7.3593  
7.3435  
7.3229  
7.3018  
7.2832  
7.2424  
7.1851  
7.1667  
7.1487  
7.1084  
7.0893  
7.0715  
6.8979  
6.8777

5.3356  
5.2995

2.6009  
2.5850  
2.5656  
2.2990  
2.2745  
1.5217  
1.5023  
1.4837  
1.3667  
1.3470  
1.3280  
1.2945  
1.2838  
1.2784  
1.2684  
0.8596  
0.8396

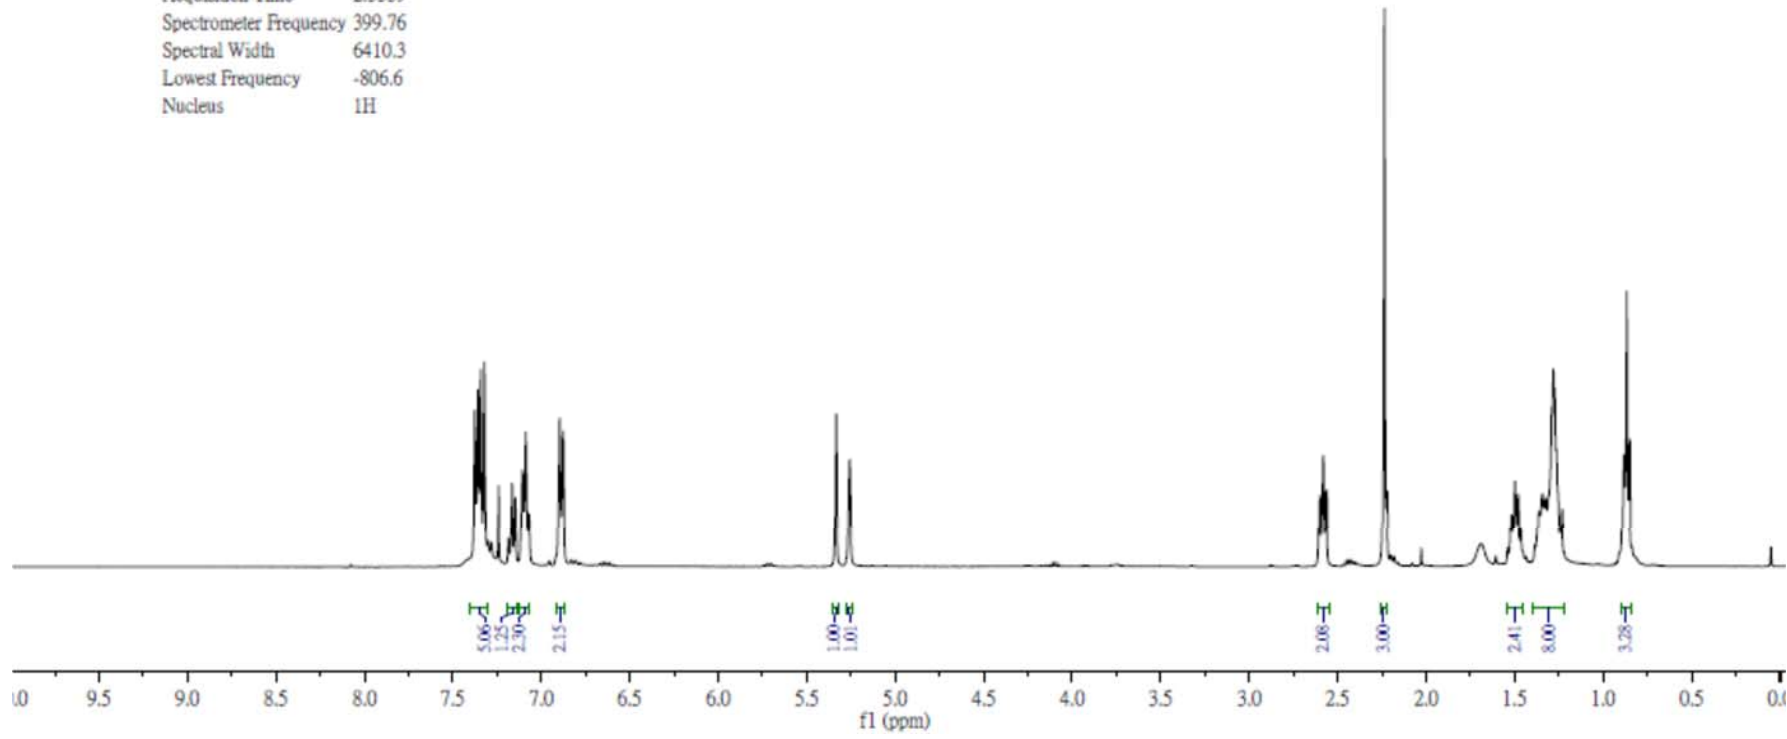

144.45  
143.14  
142.71  
135.84  
128.56  
128.13  
128.37  
128.02  
127.38  
126.87  
126.68  
126.13  
112.13

77.48  
77.16  
76.84

34.53  
31.74  
28.85  
26.60  
22.72  
21.57  
14.21

| Parameter              | Value               |
|------------------------|---------------------|
| Origin                 | JEOL                |
| Spectrometer           | ECA                 |
| Solvent                | cdcl3               |
| Temperature            |                     |
| Experiment             | 1D                  |
| Number of Scans        | 800                 |
| Receiver Gain          |                     |
| Relaxation Delay       | 2.0000              |
| Pulse Width            | 4.7316              |
| Acquisition Time       | 0.6336              |
| Modification Date      | 2021-05-18T17:18:24 |
| Spectrometer Frequency | 100.53              |
| Spectral Width         | 25252.1             |
| Lowest Frequency       | -2569.0             |
| Nucleus                | Carbon13            |

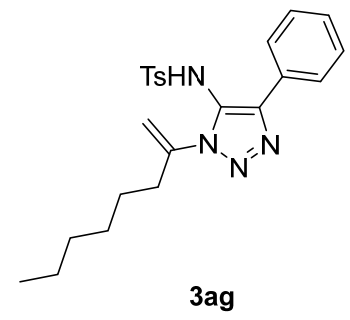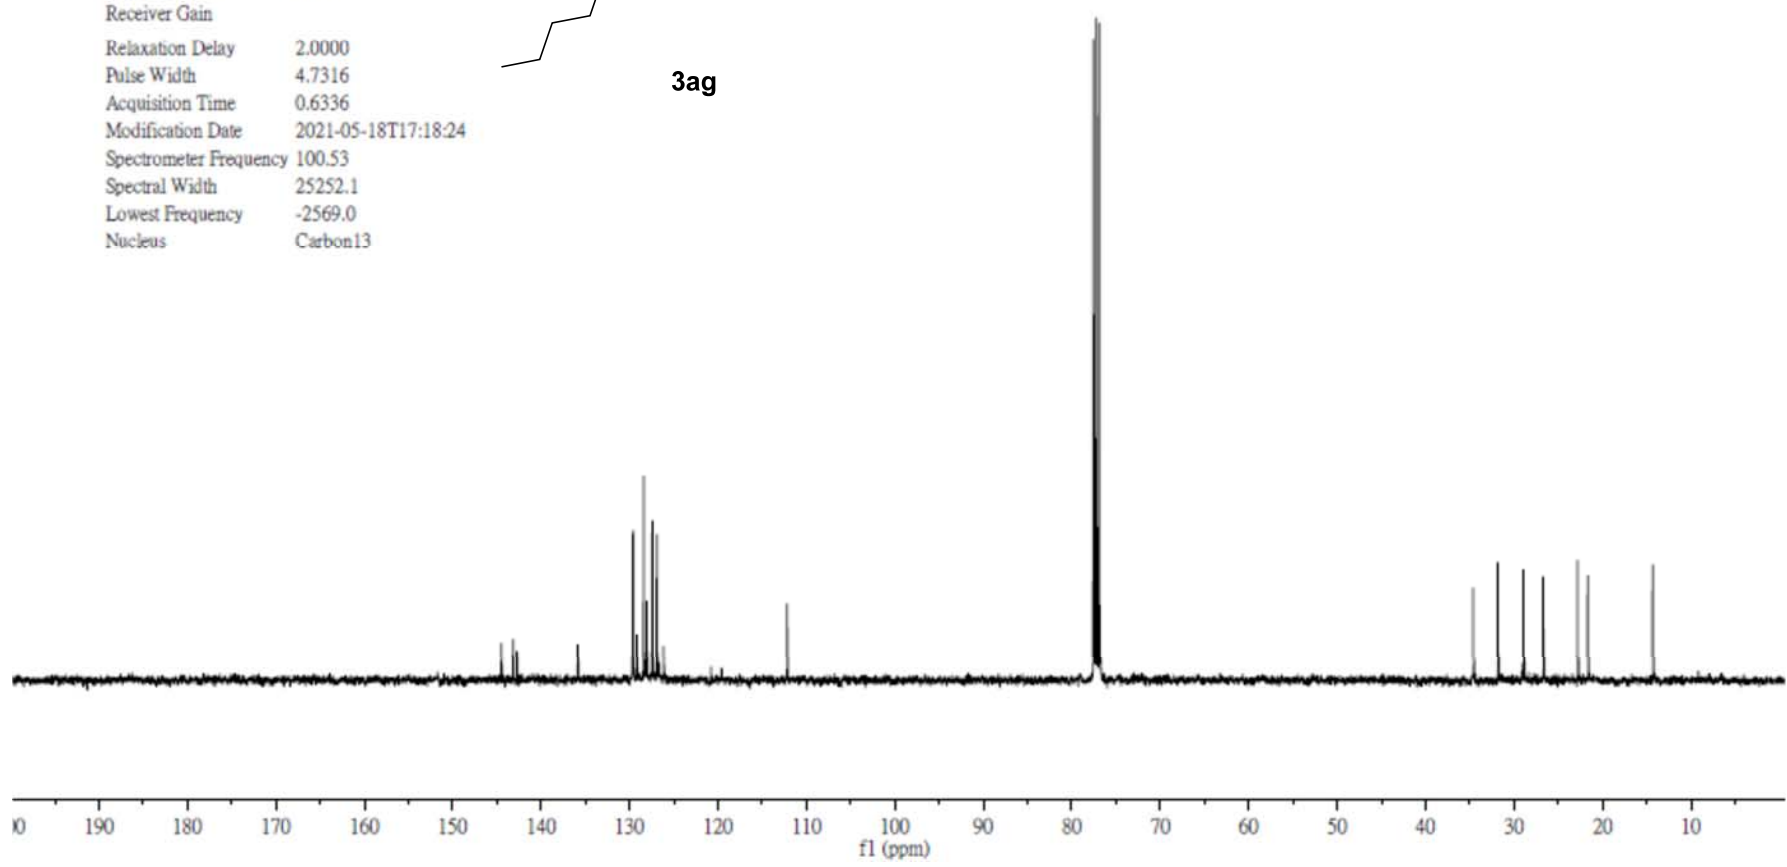

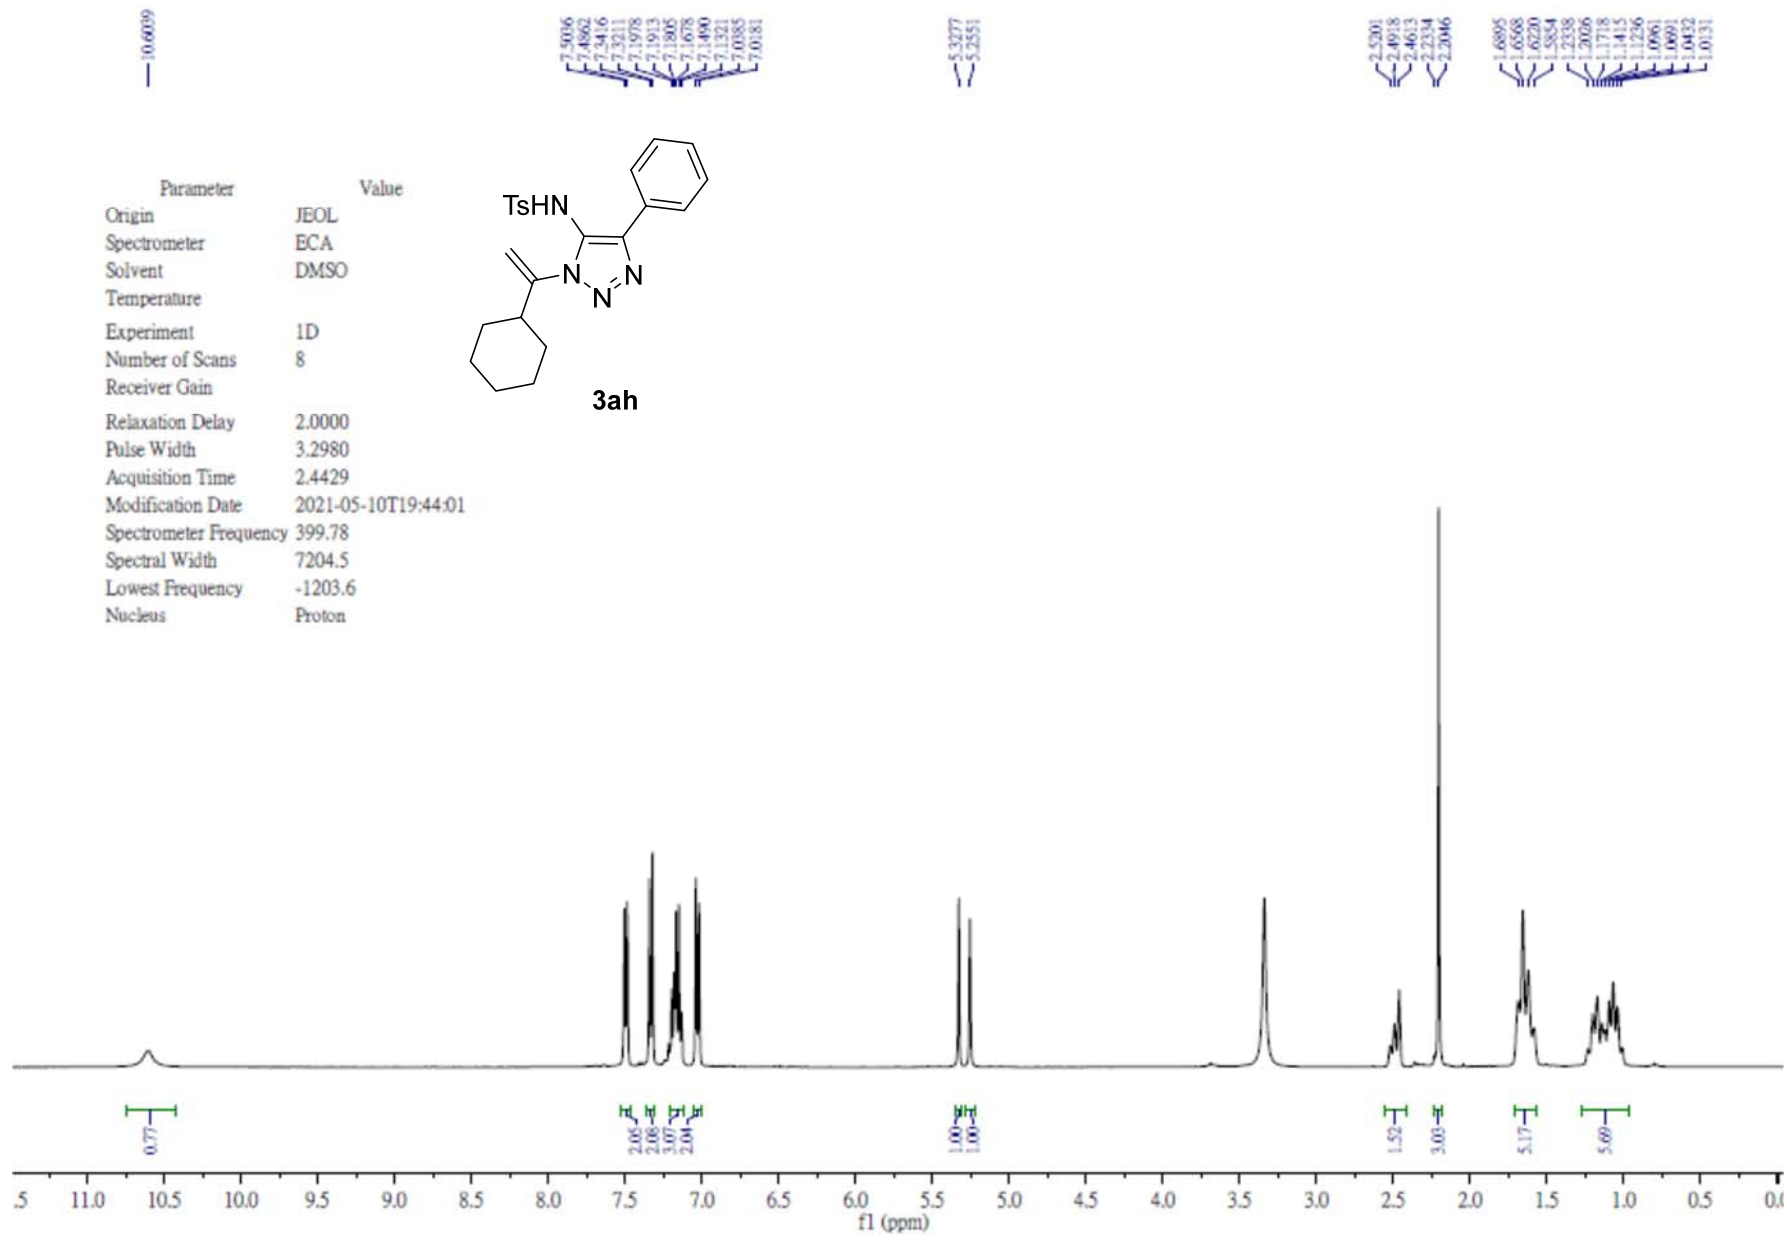

146.53  
143.42  
141.83  
137.52  
126.42  
126.34  
126.21  
127.66  
126.98  
126.46  
126.18  
111.83

41.16  
40.15  
39.94  
39.73  
39.52  
39.31  
39.10  
38.89  
30.41  
25.66  
20.93

| Parameter              | Value               |
|------------------------|---------------------|
| Origin                 | JEOL                |
| Spectrometer           | ECA                 |
| Solvent                | DMSO                |
| Temperature            |                     |
| Experiment             | 1D                  |
| Number of Scans        | 600                 |
| Receiver Gain          |                     |
| Relaxation Delay       | 2.0000              |
| Pulse Width            | 4.7316              |
| Acquisition Time       | 0.6336              |
| Modification Date      | 2021-05-10T23:56:05 |
| Spectrometer Frequency | 100.53              |
| Spectral Width         | 25252.1             |
| Lowest Frequency       | -2623.0             |
| Nucleus                | Carbon13            |

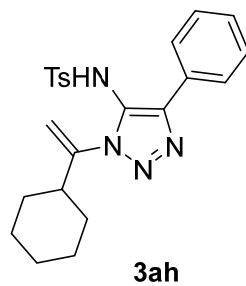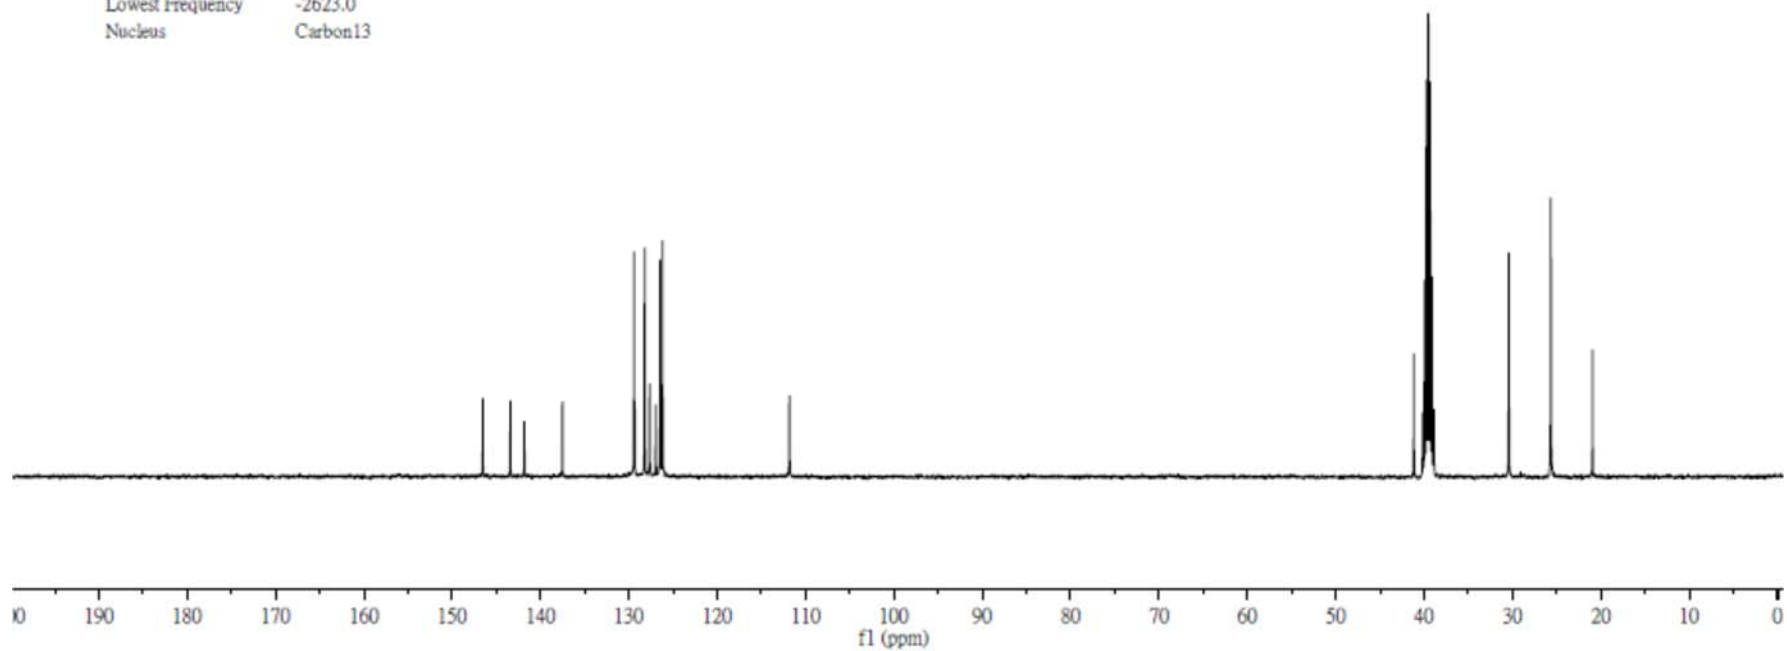

10.7411

7.6263  
7.6138  
7.6062  
7.6041  
7.3962  
7.3156  
7.2588  
7.2533  
7.2544  
7.1691  
7.1057  
6.9990  
6.9789  
6.8764  
6.8696  
6.8618

5.4600

2.4998

2.3099

| Parameter              | Value               |
|------------------------|---------------------|
| Origin                 | JEOL                |
| Spectrometer           | ECA                 |
| Solvent                | DMSO                |
| Temperature            |                     |
| Experiment             | 1D                  |
| Number of Scans        | 8                   |
| Receiver Gain          |                     |
| Relaxation Delay       | 2.0000              |
| Pulse Width            | 3.2980              |
| Acquisition Time       | 2.4429              |
| Modification Date      | 2021-05-10T19:48:32 |
| Spectrometer Frequency | 399.78              |
| Spectral Width         | 7204.5              |
| Lowest Frequency       | -1188.4             |
| Nucleus                | Proton              |

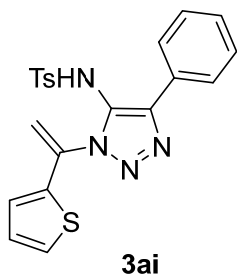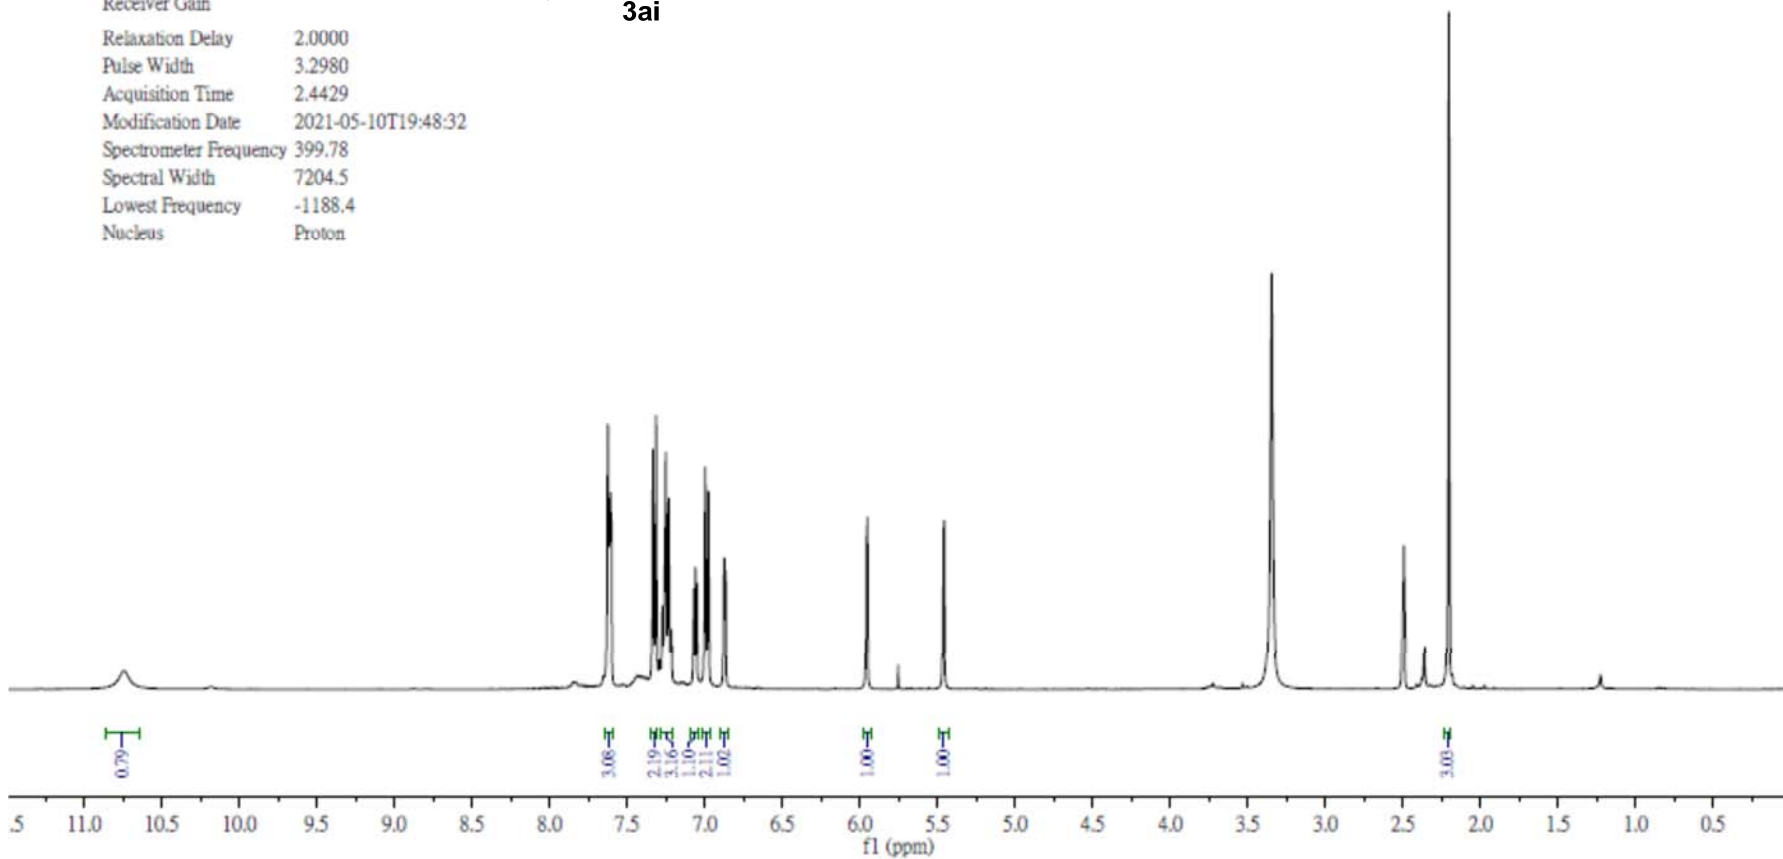

143.40  
141.43  
138.10  
137.11  
134.68  
129.29  
129.07  
128.26  
127.85  
127.81  
127.65  
126.40  
126.15  
113.85

40.15  
39.94  
39.73  
39.52  
39.31  
39.10  
38.89

20.94

| Parameter              | Value               |
|------------------------|---------------------|
| Origin                 | JEOL                |
| Spectrometer           | ECA                 |
| Solvent                | DMSO                |
| Temperature            |                     |
| Experiment             | 1D                  |
| Number of Scans        | 720                 |
| Receiver Gain          |                     |
| Relaxation Delay       | 2.0000              |
| Pulse Width            | 4.7316              |
| Acquisition Time       | 0.6336              |
| Modification Date      | 2021-05-10T23:57:01 |
| Spectrometer Frequency | 100.53              |
| Spectral Width         | 25252.1             |
| Lowest Frequency       | -2626.2             |
| Nucleus                | Carbon13            |

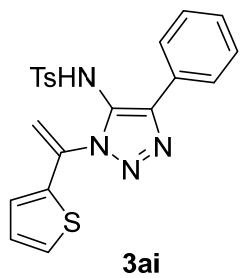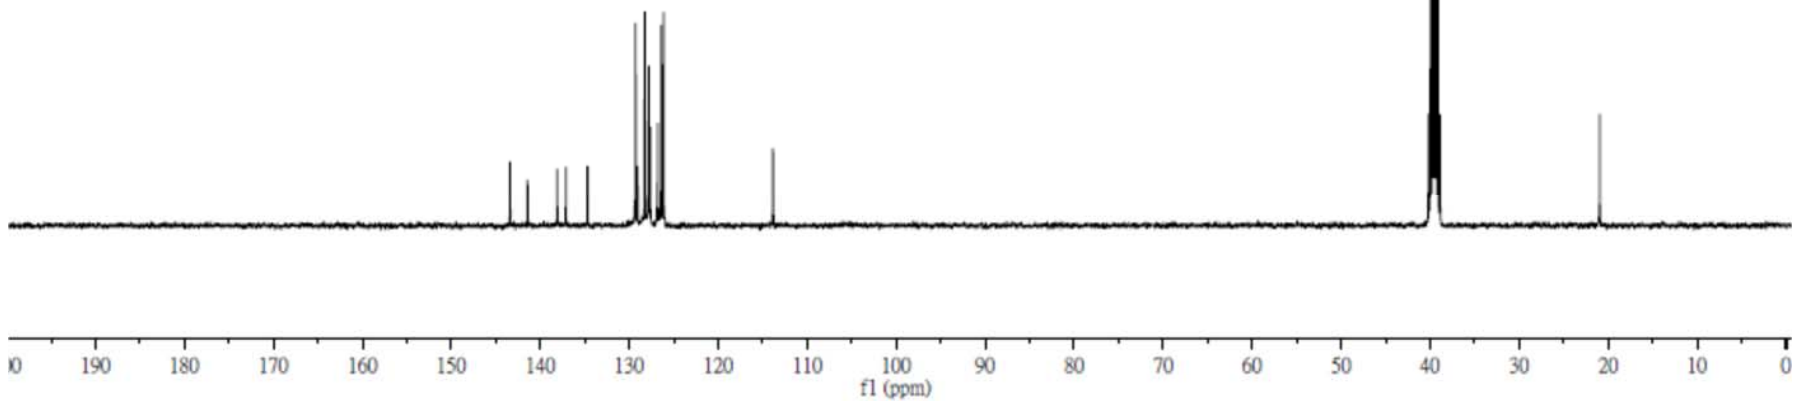



| Parameter              | Value               |
|------------------------|---------------------|
| Origin                 | JEOL                |
| Spectrometer           | ECA                 |
| Solvent                | DMSO                |
| Temperature            |                     |
| Experiment             | 1D                  |
| Number of Scans        | 8                   |
| Receiver Gain          |                     |
| Relaxation Delay       | 2.0000              |
| Pulse Width            | 3.2980              |
| Acquisition Time       | 2.4429              |
| Modification Date      | 2021-05-10T19:55:40 |
| Spectrometer Frequency | 399.78              |
| Spectral Width         | 7204.5              |
| Lowest Frequency       | -1188.0             |
| Nucleus                | Proton              |

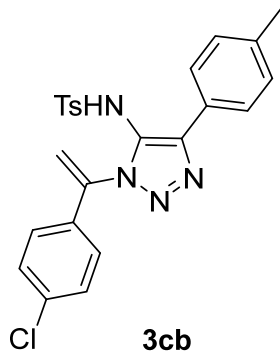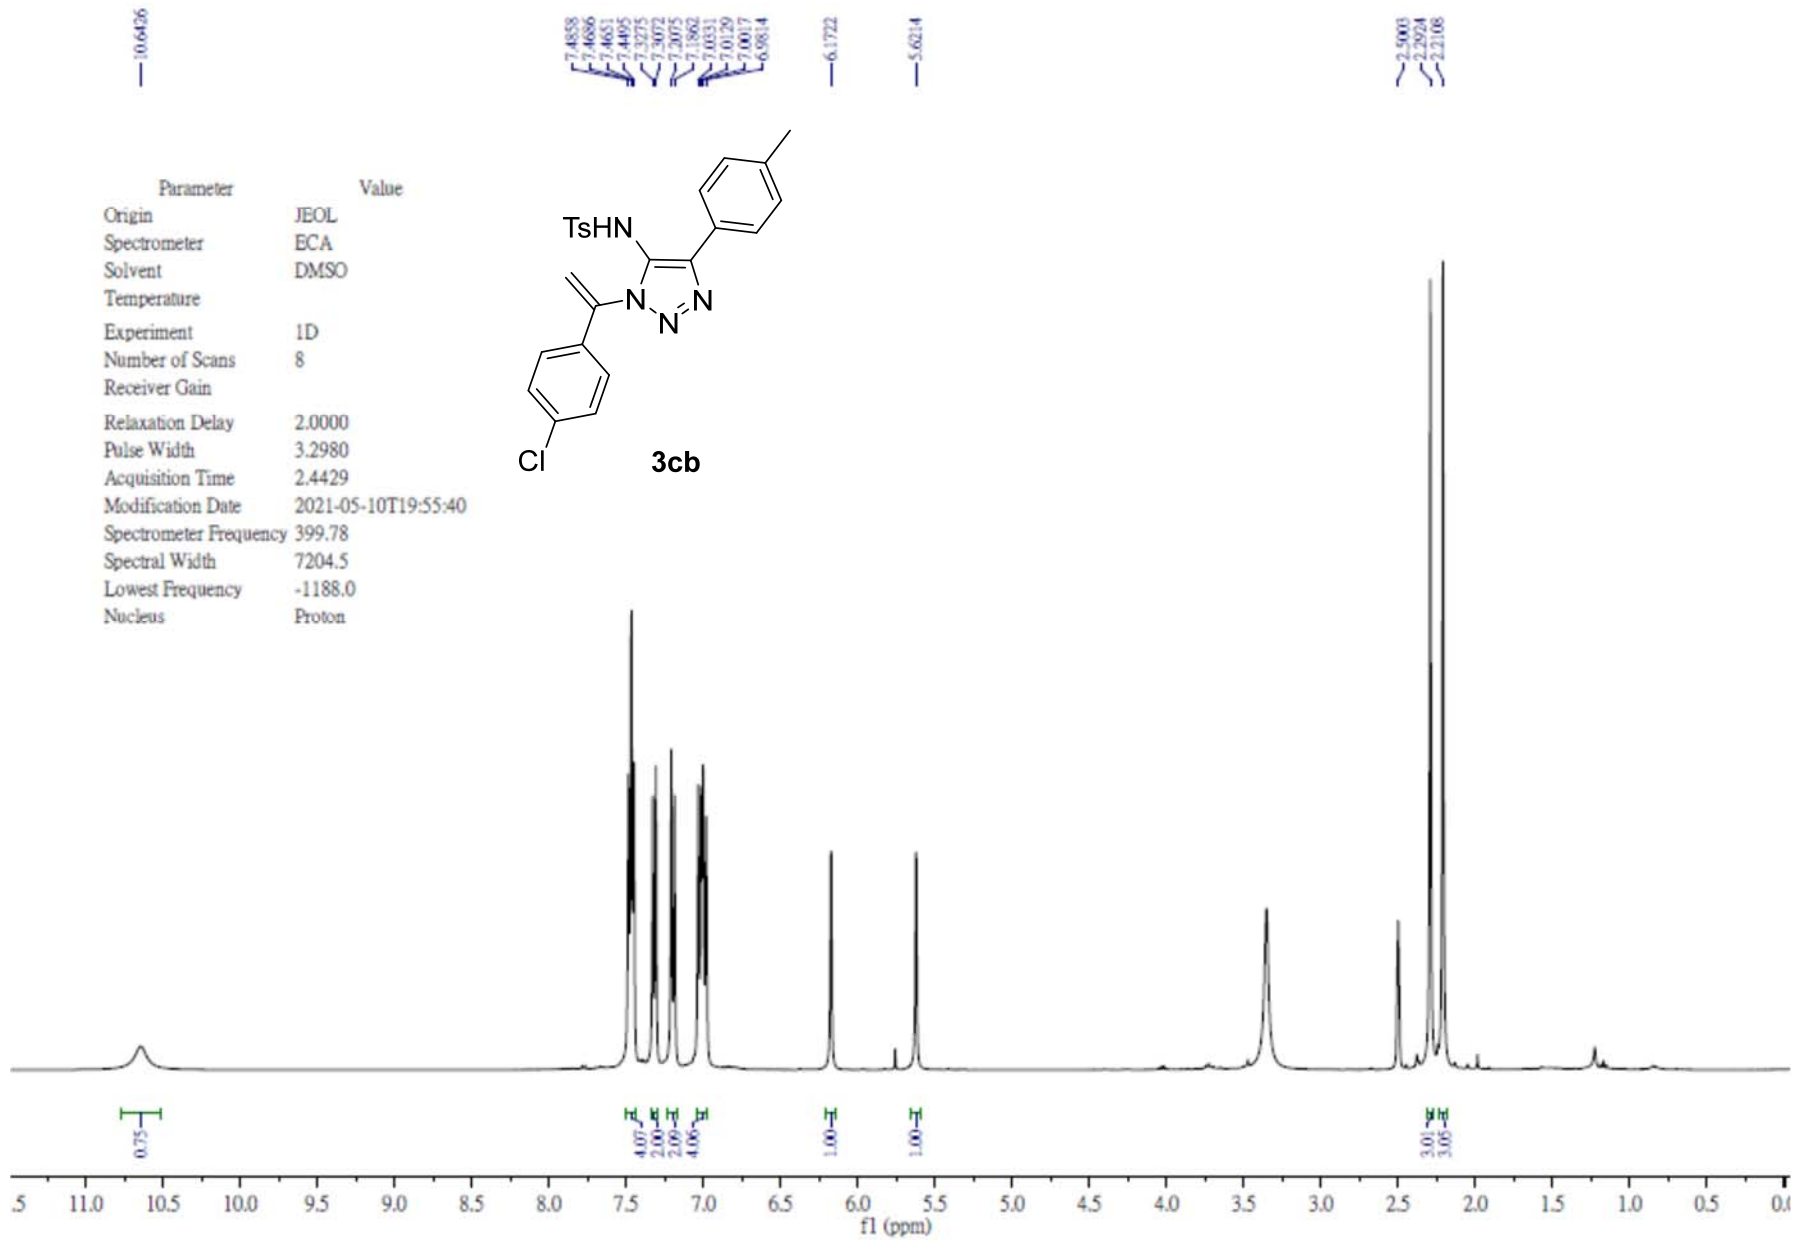

| Parameter              | Value               |
|------------------------|---------------------|
| Origin                 | JEOL                |
| Spectrometer           | ECA                 |
| Solvent                | DMSO                |
| Temperature            |                     |
| Experiment             | 1D                  |
| Number of Scans        | 900                 |
| Receiver Gain          |                     |
| Relaxation Delay       | 2.0000              |
| Pulse Width            | 4.7316              |
| Acquisition Time       | 0.6336              |
| Modification Date      | 2021-05-10T23:57:56 |
| Spectrometer Frequency | 100.53              |
| Spectral Width         | 25252.1             |
| Lowest Frequency       | -2625.2             |
| Nucleus                | Carbon13            |

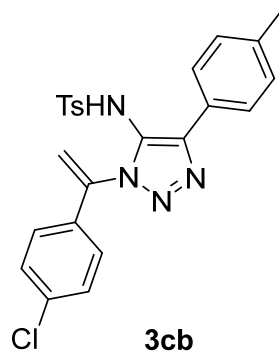

143.41  
141.64  
138.98  
137.38  
137.29  
133.91  
133.58  
129.74  
128.79  
128.58  
127.00  
126.45  
126.27  
126.06  
116.00

40.15  
39.94  
39.73  
39.52  
39.31  
39.10  
38.89  
20.91  
20.86

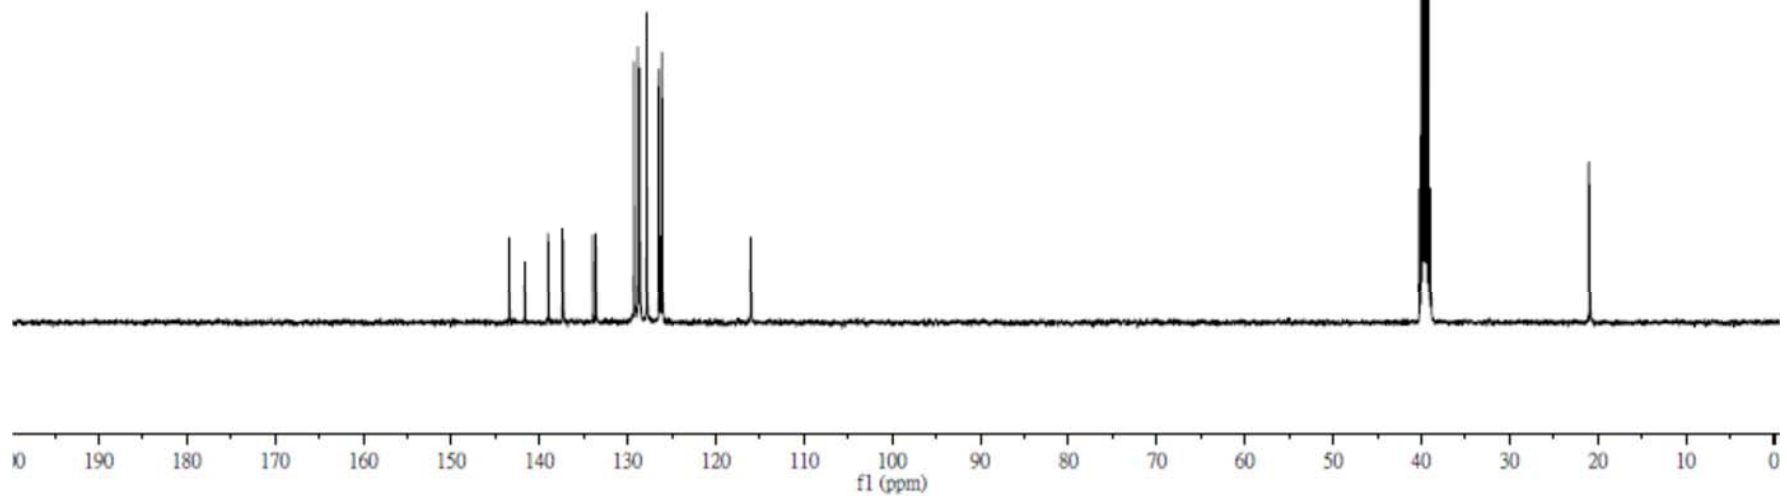

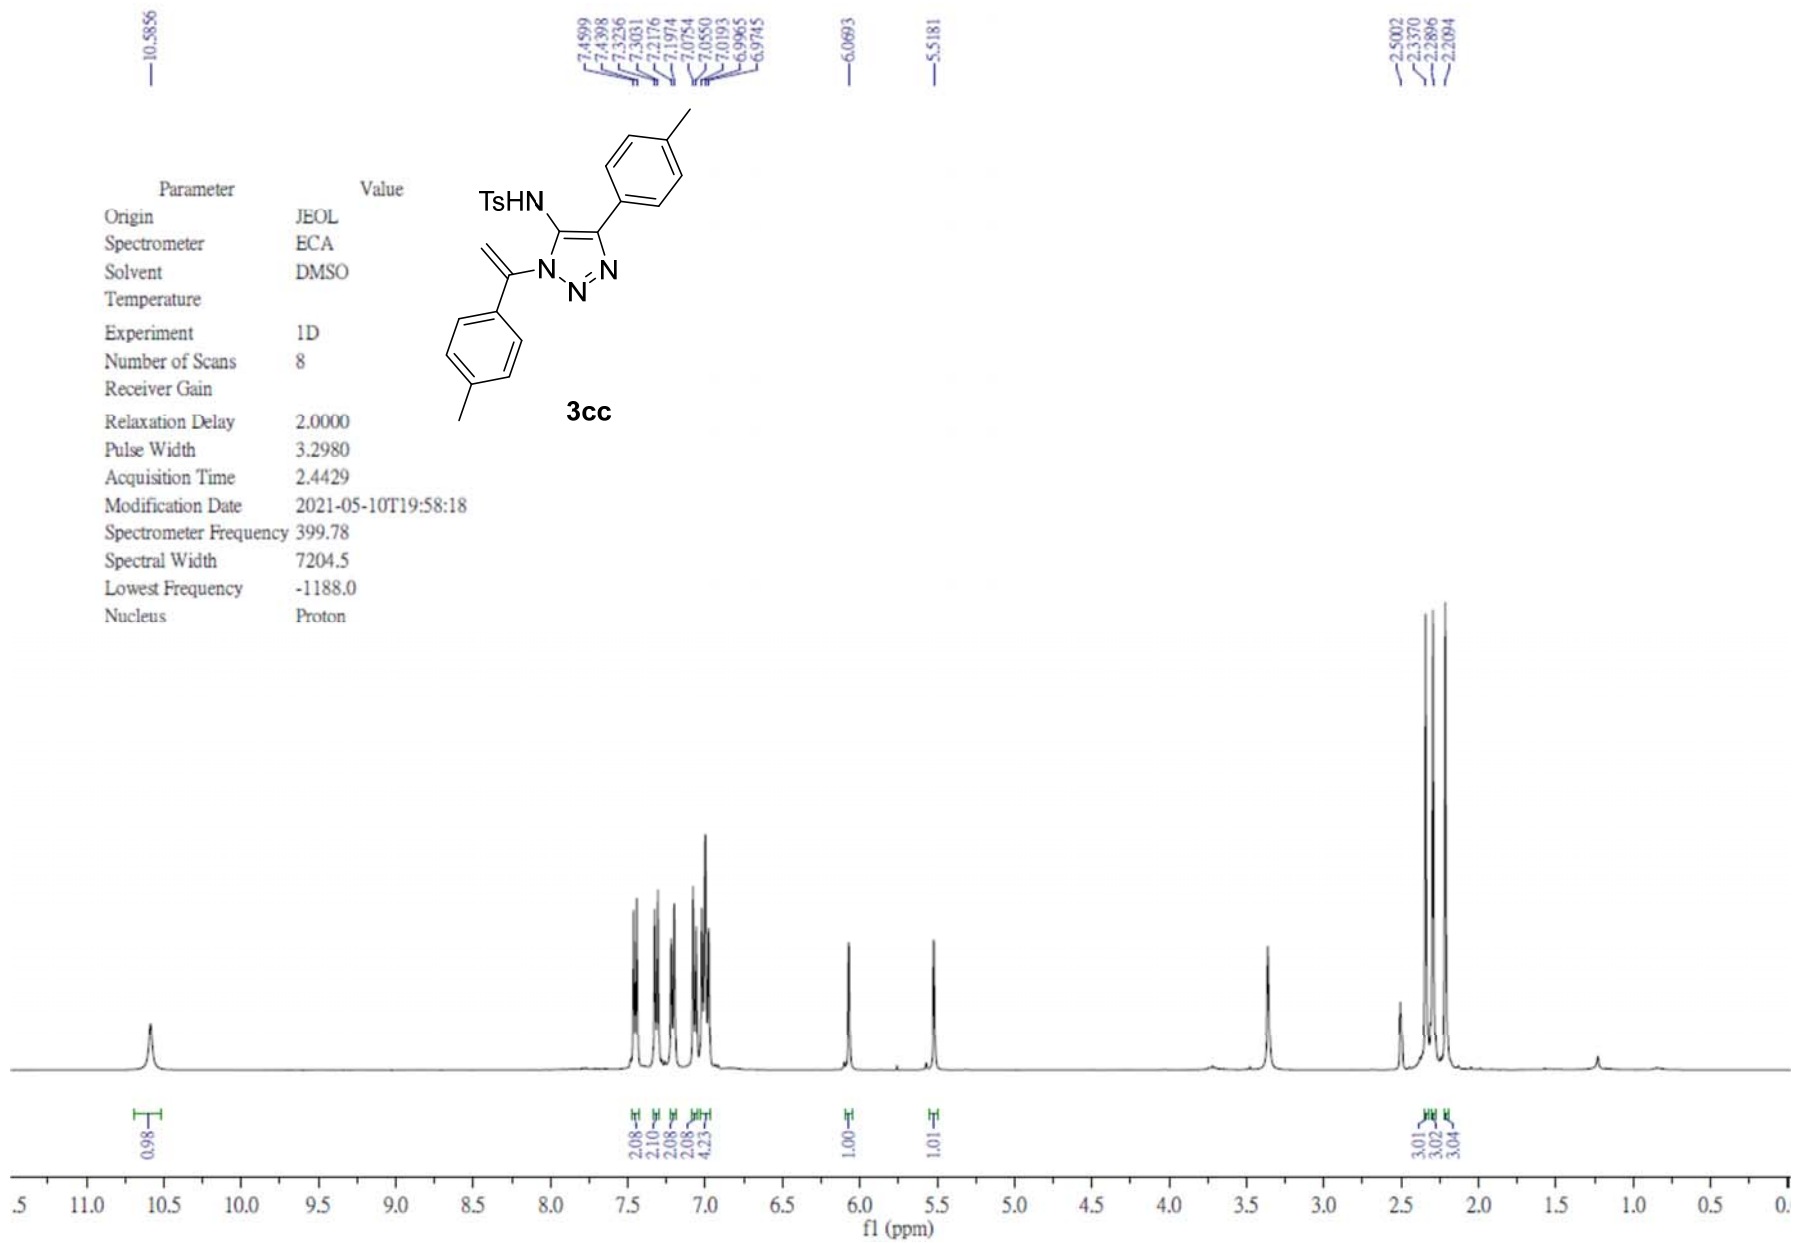

143.36  
141.58  
140.07  
138.89  
137.40  
137.29  
132.03  
129.20  
128.76  
127.72  
126.41  
126.36  
126.07  
125.80  
114.40

40.15  
39.94  
39.73  
39.52  
39.31  
39.10  
38.89  
20.90  
20.85  
20.82

| Parameter              | Value               |
|------------------------|---------------------|
| Origin                 | JEOL                |
| Spectrometer           | ECA                 |
| Solvent                | DMSO                |
| Temperature            |                     |
| Experiment             | 1D                  |
| Number of Scans        | 900                 |
| Receiver Gain          |                     |
| Relaxation Delay       | 2.0000              |
| Pulse Width            | 4.7316              |
| Acquisition Time       | 0.6336              |
| Modification Date      | 2021-05-10T23:58:50 |
| Spectrometer Frequency | 100.53              |
| Spectral Width         | 25252.1             |
| Lowest Frequency       | -2625.4             |
| Nucleus                | Carbon13            |

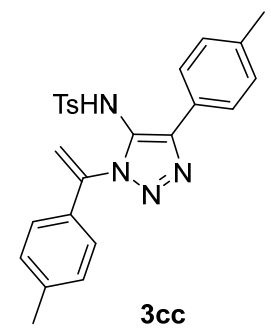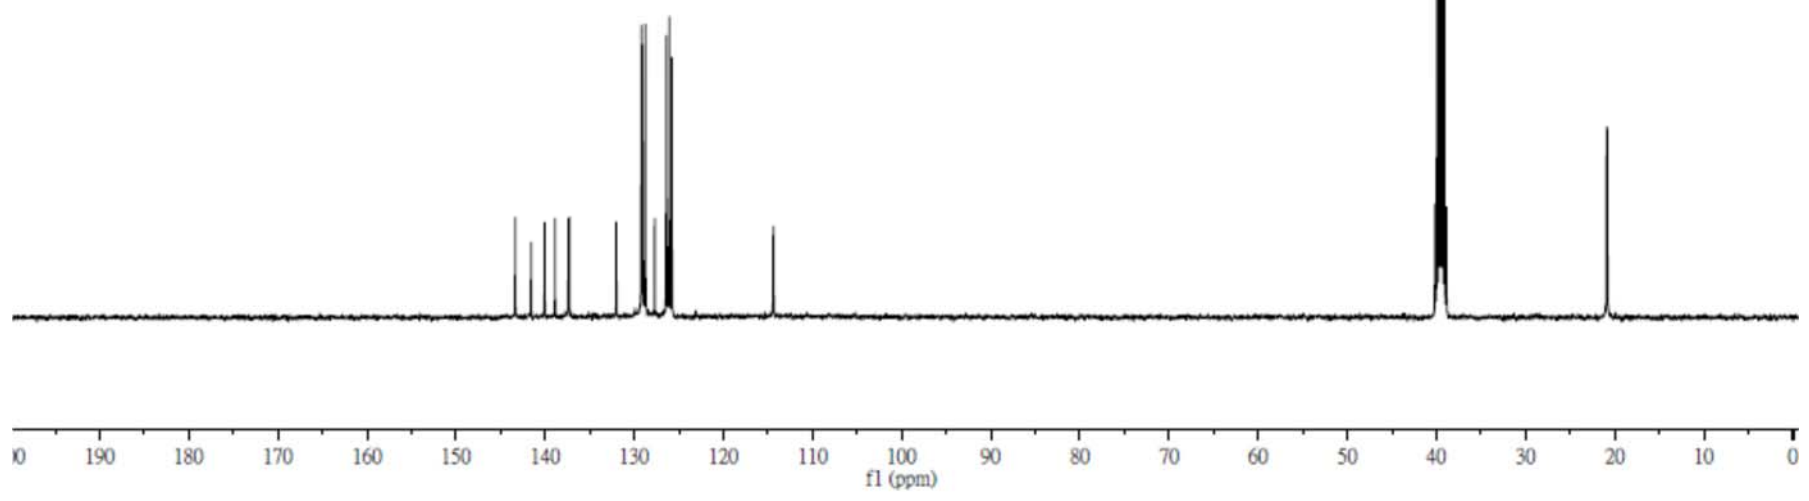

10.7495

7.5433  
7.5224  
7.4955  
7.4743  
7.3764  
7.3064  
7.2652  
7.2434  
7.2286  
7.2168  
7.0126  
6.9927

6.2290

5.6653

2.4997

2.2325

| Parameter              | Value               |
|------------------------|---------------------|
| Origin                 | JEOL                |
| Spectrometer           | ECA                 |
| Solvent                | DMSO                |
| Temperature            |                     |
| Experiment             | 1D                  |
| Number of Scans        | 8                   |
| Receiver Gain          |                     |
| Relaxation Delay       | 2.0000              |
| Pulse Width            | 3.2980              |
| Acquisition Time       | 2.4429              |
| Modification Date      | 2021-05-06T14:28:25 |
| Spectrometer Frequency | 399.78              |
| Spectral Width         | 7204.5              |
| Lowest Frequency       | -1188.0             |
| Nucleus                | Proton              |

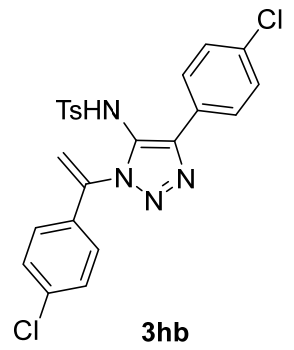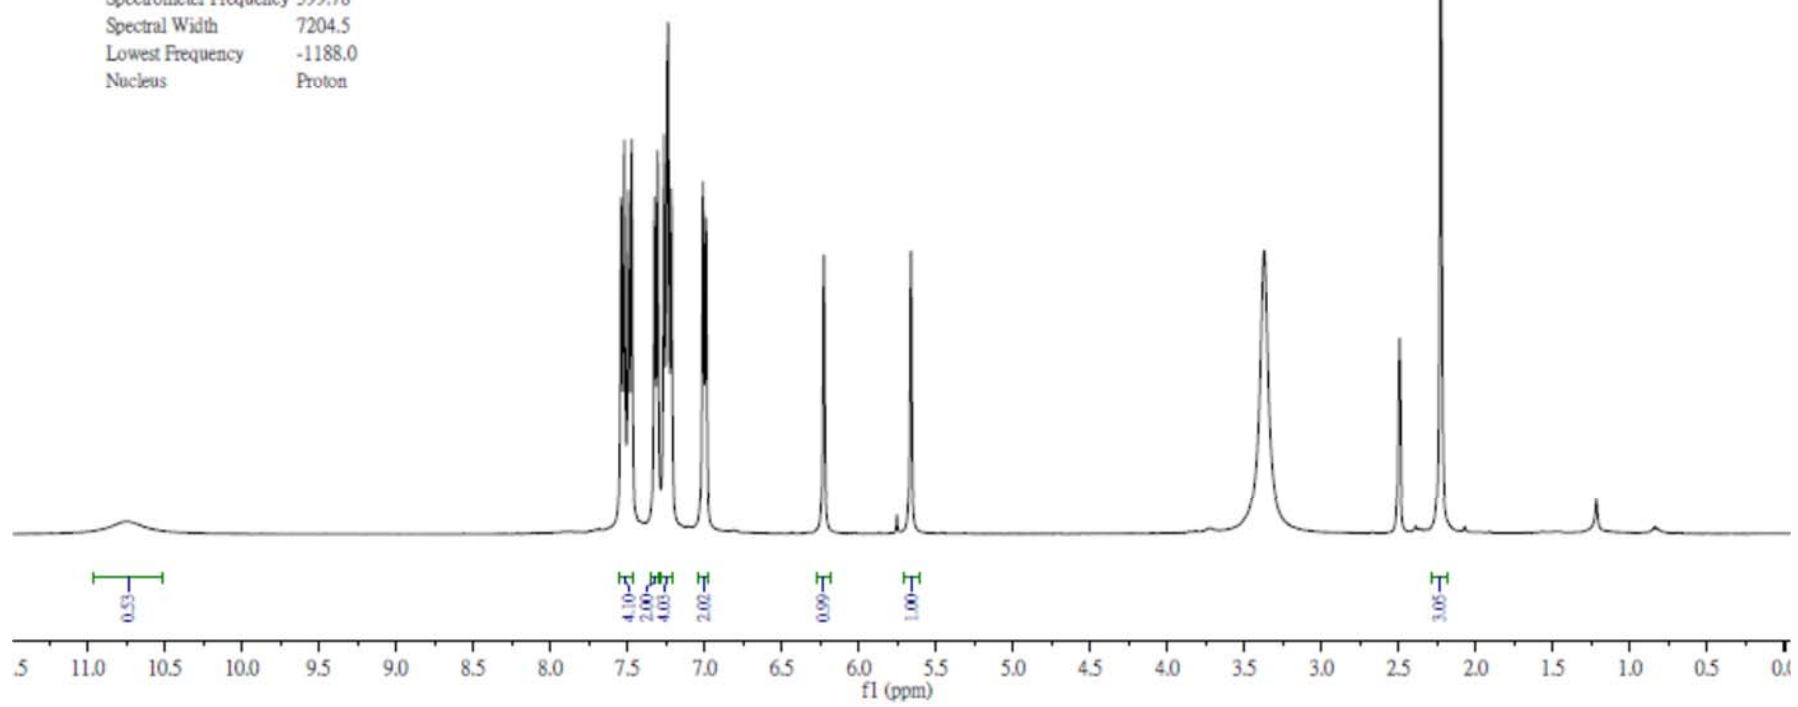

| Parameter              | Value               |
|------------------------|---------------------|
| Origin                 | JEOL                |
| Spectrometer           | ECA                 |
| Solvent                | DMSO                |
| Temperature            |                     |
| Experiment             | 1D                  |
| Number of Scans        | 500                 |
| Receiver Gain          |                     |
| Relaxation Delay       | 2.0000              |
| Pulse Width            | 4.7316              |
| Acquisition Time       | 0.6336              |
| Modification Date      | 2021-05-11T00:01:27 |
| Spectrometer Frequency | 100.53              |
| Spectral Width         | 25252.1             |
| Lowest Frequency       | -2622.9             |
| Nucleus                | Carbon13            |

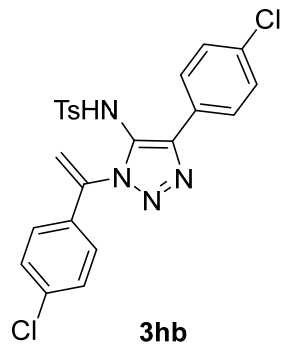

143.72  
140.56  
138.95  
137.12  
134.01  
133.55  
132.77  
129.36  
128.66  
128.41  
128.32  
127.96  
127.84  
126.51  
116.30

40.15  
39.94  
39.73  
39.52  
39.31  
39.10  
38.89

20.95

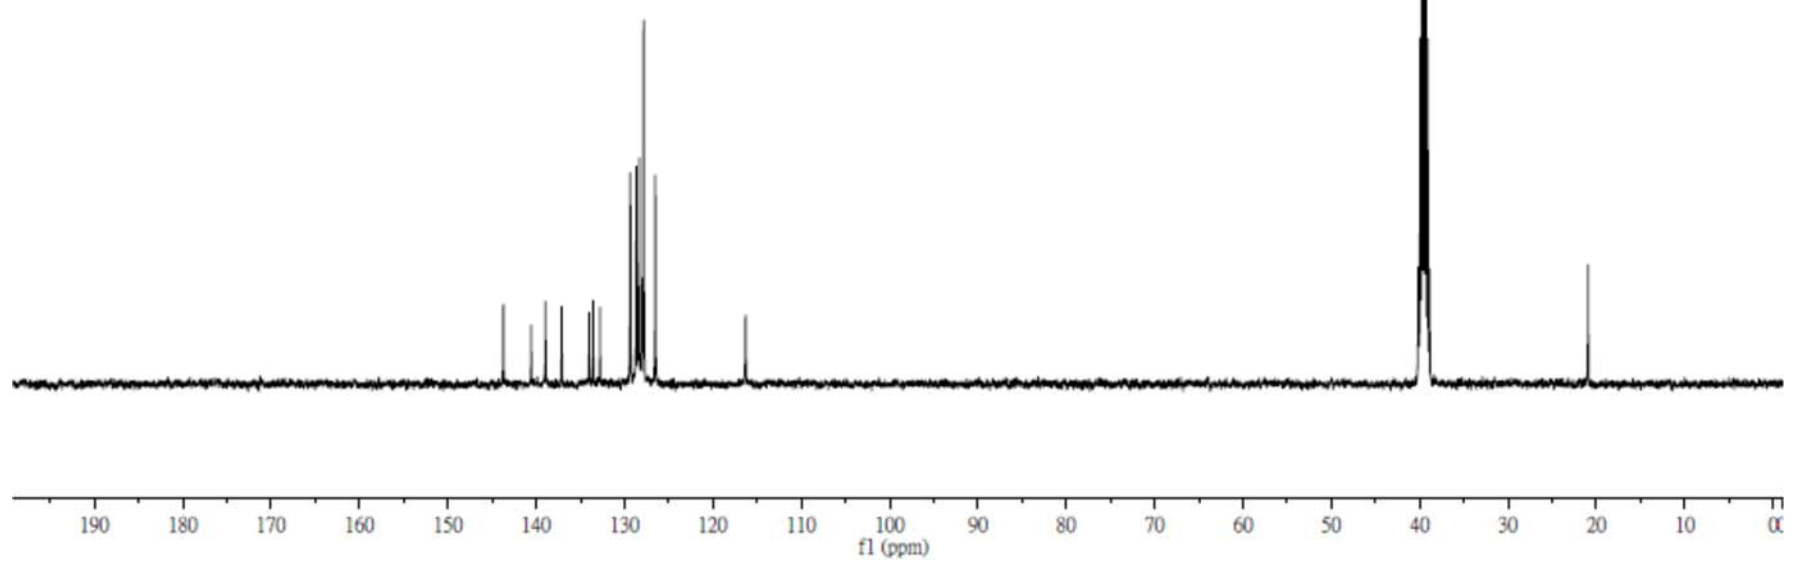

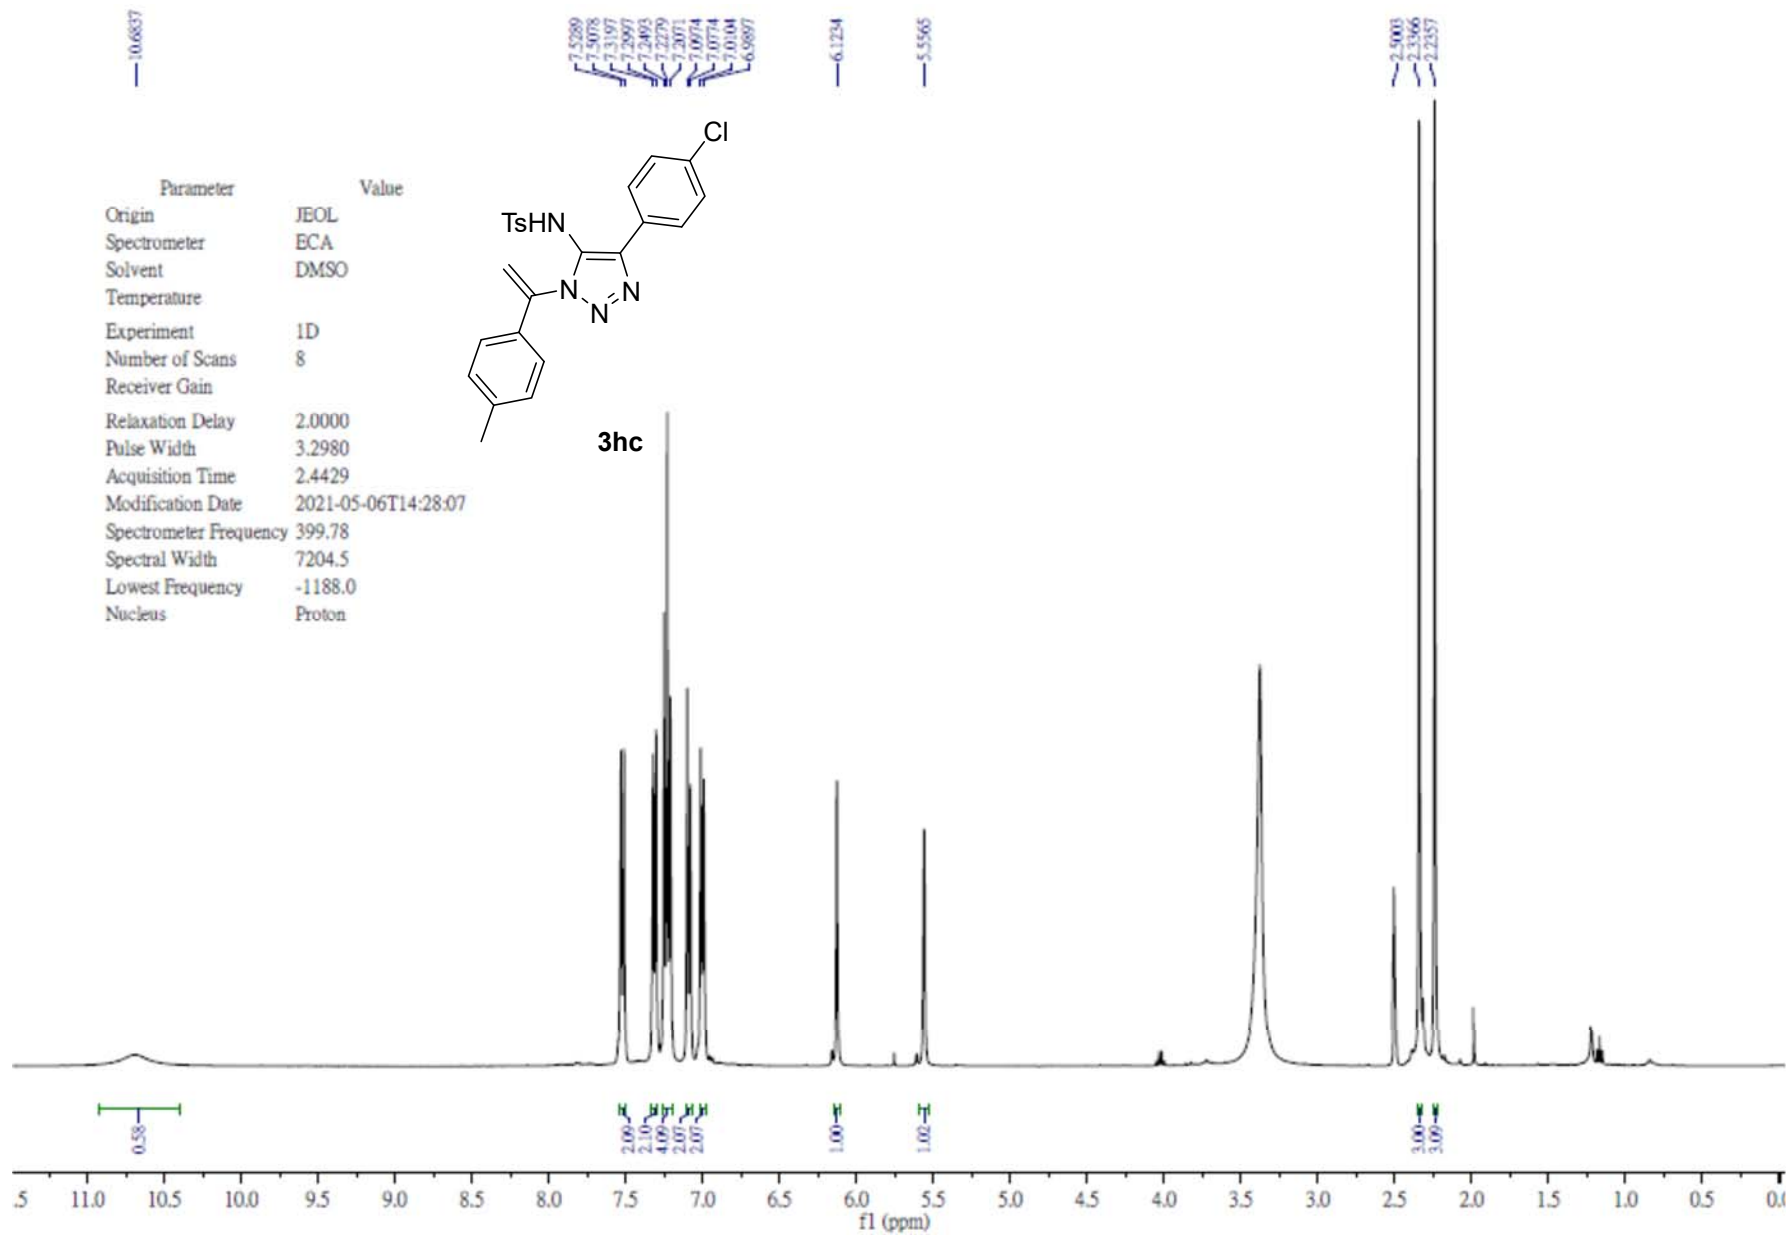

143.66  
140.47  
140.04  
138.99  
137.28  
132.70  
132.00  
129.32  
129.18  
128.38  
128.29  
128.07  
127.84  
126.49  
125.83  
114.70

40.15  
39.94  
39.73  
39.52  
39.31  
39.10  
38.89

20.95  
20.84

| Parameter              | Value               |
|------------------------|---------------------|
| Origin                 | JEOL                |
| Spectrometer           | ECA                 |
| Solvent                | DMSO                |
| Temperature            |                     |
| Experiment             | 1D                  |
| Number of Scans        | 851                 |
| Receiver Gain          |                     |
| Relaxation Delay       | 2.0000              |
| Pulse Width            | 4.7316              |
| Acquisition Time       | 0.6336              |
| Modification Date      | 2021-05-10T23:59:43 |
| Spectrometer Frequency | 100.53              |
| Spectral Width         | 25252.1             |
| Lowest Frequency       | -2622.9             |
| Nucleus                | Carbon13            |

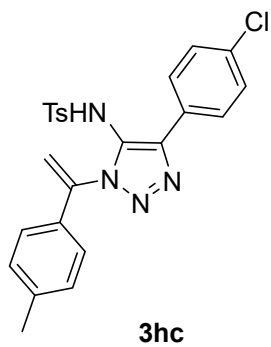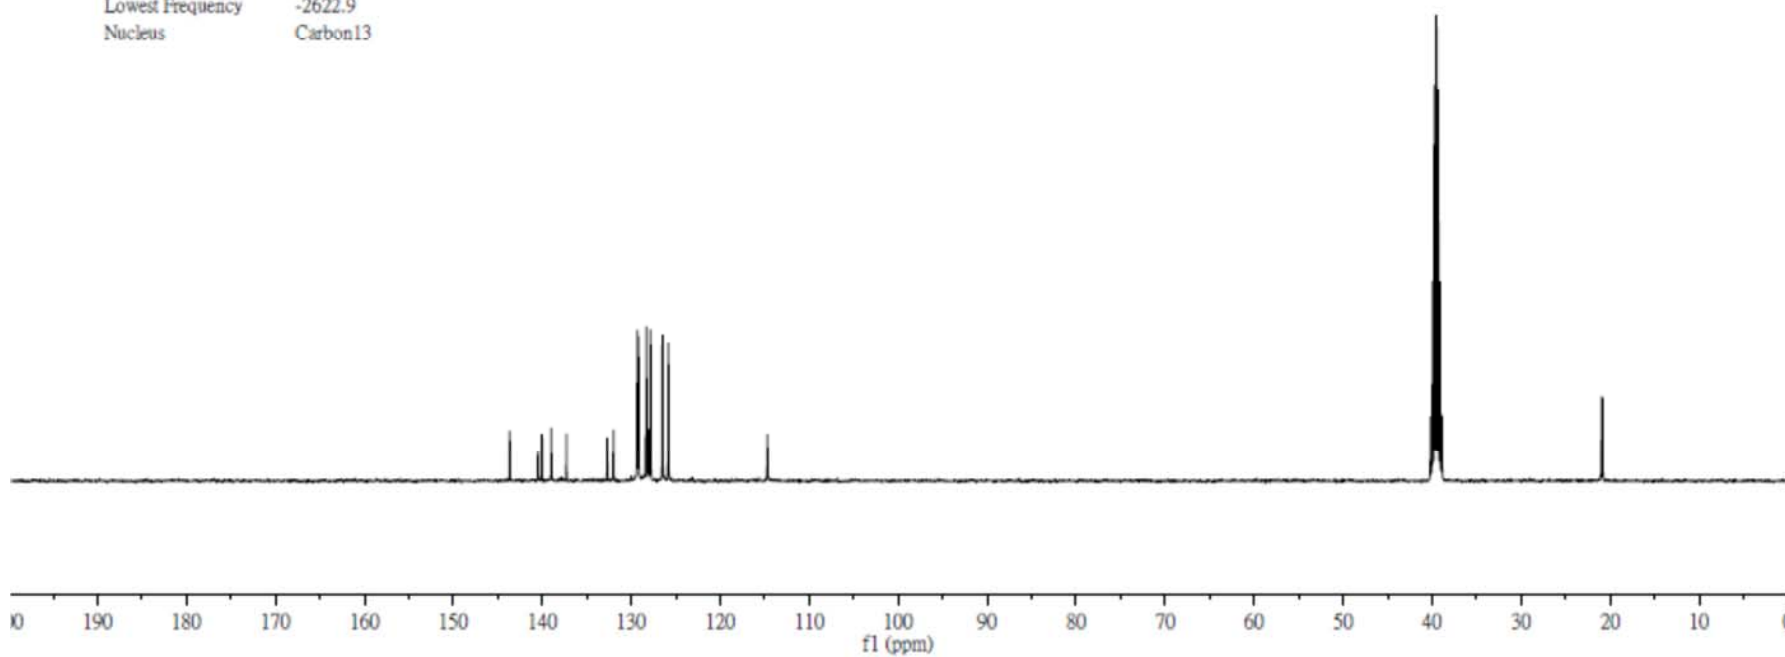



9.2818  
 7.7868  
 7.7817  
 7.7738  
 7.7703  
 7.7683  
 7.7645  
 7.7624  
 7.6076  
 7.6007  
 7.5964  
 7.5923  
 7.5829  
 7.5413  
 7.5314  
 7.5240  
 7.5147  
 7.2986  
 7.2935  
 7.0047  
 6.9843

| Parameter              | Value          |
|------------------------|----------------|
| Origin                 | Varian         |
| Spectrometer           | nmrs           |
| Solvent                | acetone        |
| Temperature            | 20.0           |
| Pulse Sequence         | s2pul          |
| Experiment             | 1D             |
| Number of Scans        | 12             |
| Receiver Gain          | 56             |
| Relaxation Delay       | 1.0000         |
| Pulse Width            | 0.0000         |
| Acquisition Time       | 2.5559         |
| Spectrometer Frequency | 399.76         |
| Spectral Width         | 6410.3         |
| Lowest Frequency       | -806.6         |
| Nucleus                | <sup>1</sup> H |

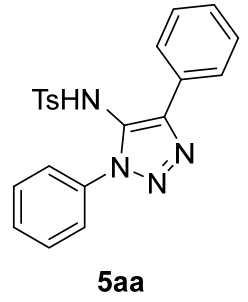

2.2889  
 2.1814  
 2.1050  
 2.0504  
 2.0449  
 2.0394

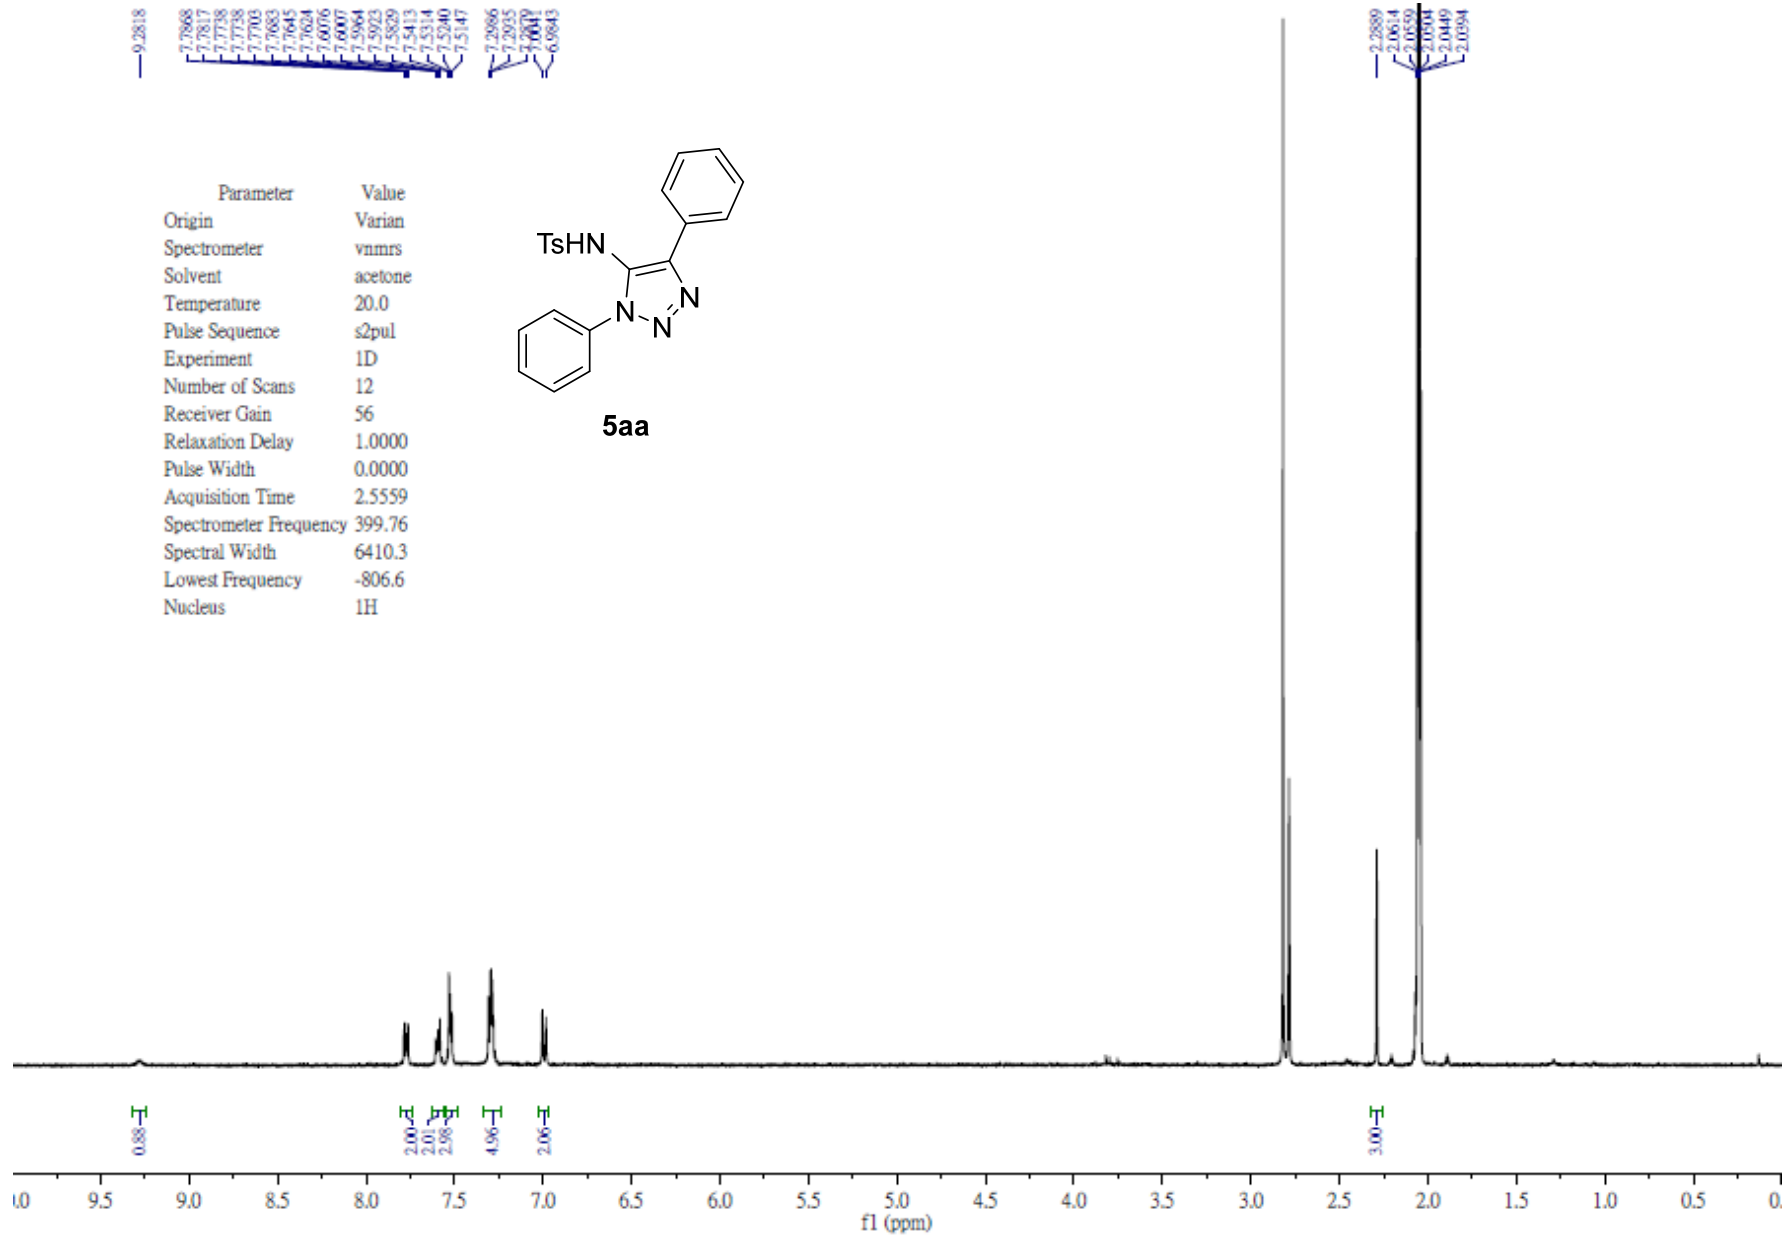

143.50  
142.44  
136.93  
135.14  
129.50  
129.37  
129.31  
128.46  
128.06  
127.25  
126.28  
126.25  
124.82

40.13  
39.92  
39.71  
39.50  
39.29  
39.08  
38.87

20.99

| Parameter              | Value               |
|------------------------|---------------------|
| Origin                 | JEOL                |
| Spectrometer           | ECA                 |
| Solvent                | DMSO                |
| Temperature            |                     |
| Experiment             | 1D                  |
| Number of Scans        | 739                 |
| Receiver Gain          |                     |
| Relaxation Delay       | 2.0000              |
| Pulse Width            | 4.6000              |
| Acquisition Time       | 0.6336              |
| Modification Date      | 2021-10-25T10:57:11 |
| Spectrometer Frequency | 100.53              |
| Spectral Width         | 25252.1             |
| Lowest Frequency       | -2573.5             |
| Nucleus                | Carbon13            |

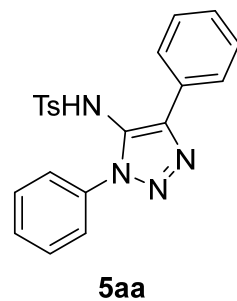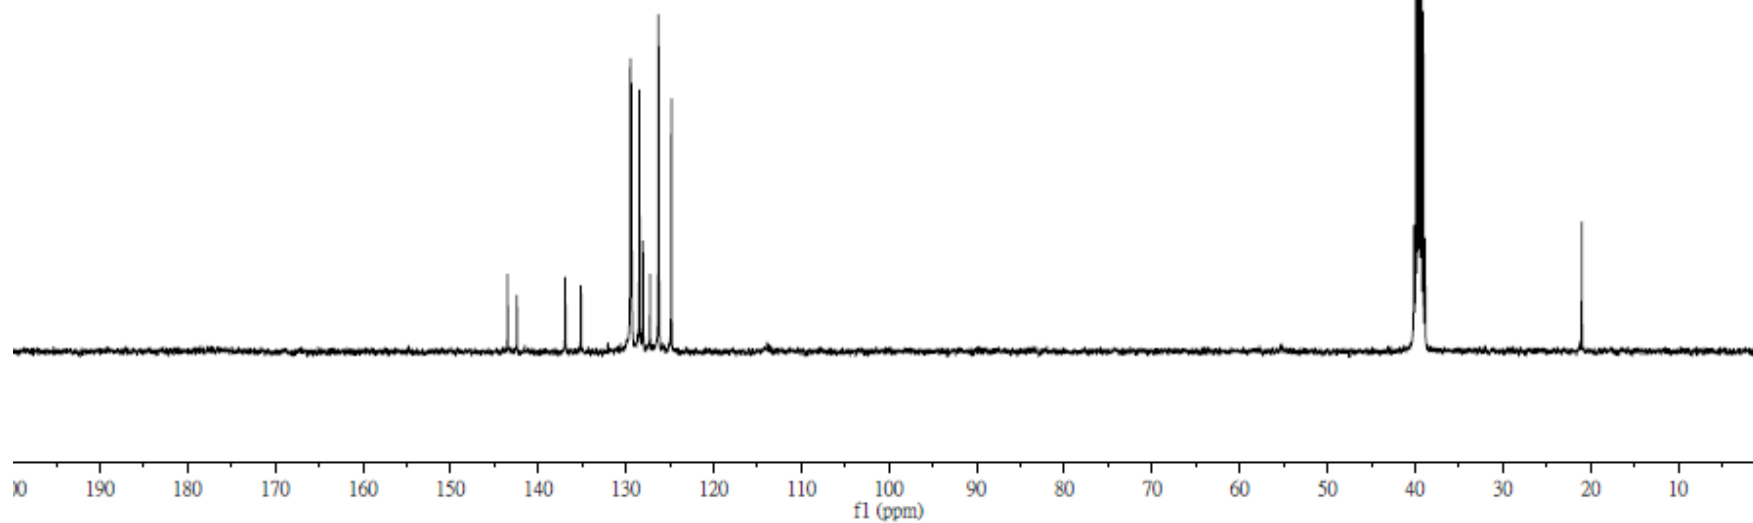

9.2454

7.8154  
7.8093  
7.8037  
7.8004  
7.7968  
7.7941  
7.7911  
7.4209  
7.3062  
7.2998  
7.2894  
7.2848  
7.2812  
6.9992

2.4350  
2.3092  
2.0613  
2.0558  
2.0503  
2.0448  
2.0393

| Parameter              | Value          |
|------------------------|----------------|
| Origin                 | Varian         |
| Spectrometer           | vnms           |
| Solvent                | acetone        |
| Temperature            | 20.0           |
| Pulse Sequence         | s2pul          |
| Experiment             | 1D             |
| Number of Scans        | 12             |
| Receiver Gain          | 54             |
| Relaxation Delay       | 1.0000         |
| Pulse Width            | 0.0000         |
| Acquisition Time       | 2.5559         |
| Spectrometer Frequency | 399.76         |
| Spectral Width         | 6410.3         |
| Lowest Frequency       | -806.6         |
| Nucleus                | <sup>1</sup> H |

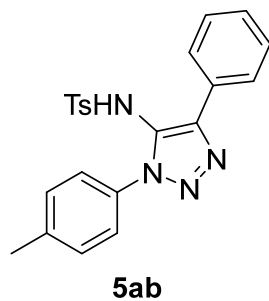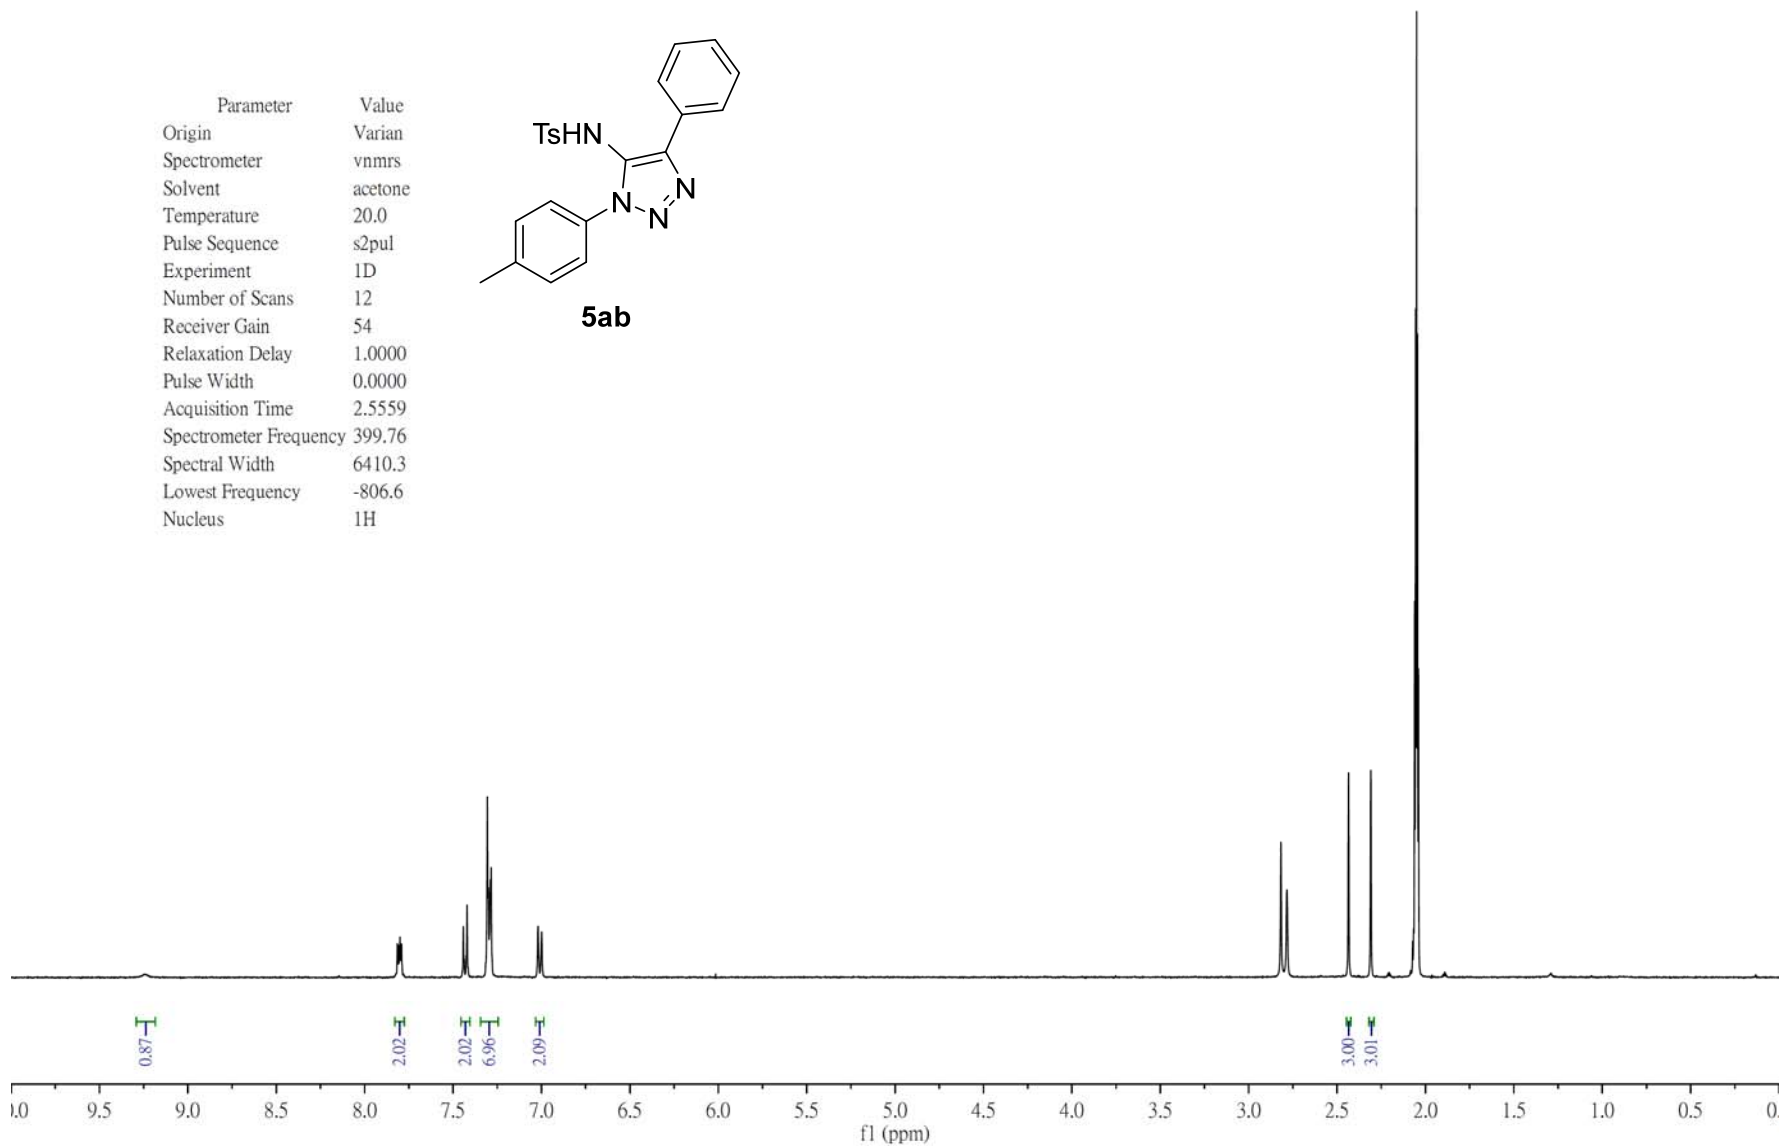

144.39  
143.32  
140.38  
137.48  
133.01  
130.46  
130.12  
129.68  
129.27  
128.97  
127.96  
126.94  
126.75  
125.22

40.13  
39.92  
39.71  
39.50  
39.29  
39.08  
38.87

21.61  
21.42

| Parameter              | Value               |
|------------------------|---------------------|
| Origin                 | JEOL                |
| Spectrometer           | ECA                 |
| Solvent                | DMSO                |
| Temperature            |                     |
| Experiment             | 1D                  |
| Number of Scans        | 1827                |
| Receiver Gain          |                     |
| Relaxation Delay       | 2.0000              |
| Pulse Width            | 4.6000              |
| Acquisition Time       | 0.6336              |
| Modification Date      | 2021-10-25T10:50:32 |
| Spectrometer Frequency | 100.53              |
| Spectral Width         | 25252.1             |
| Lowest Frequency       | -2573.5             |
| Nucleus                | Carbon13            |

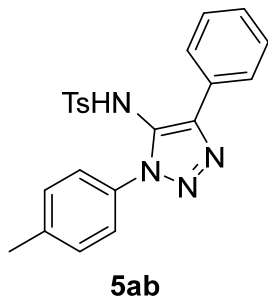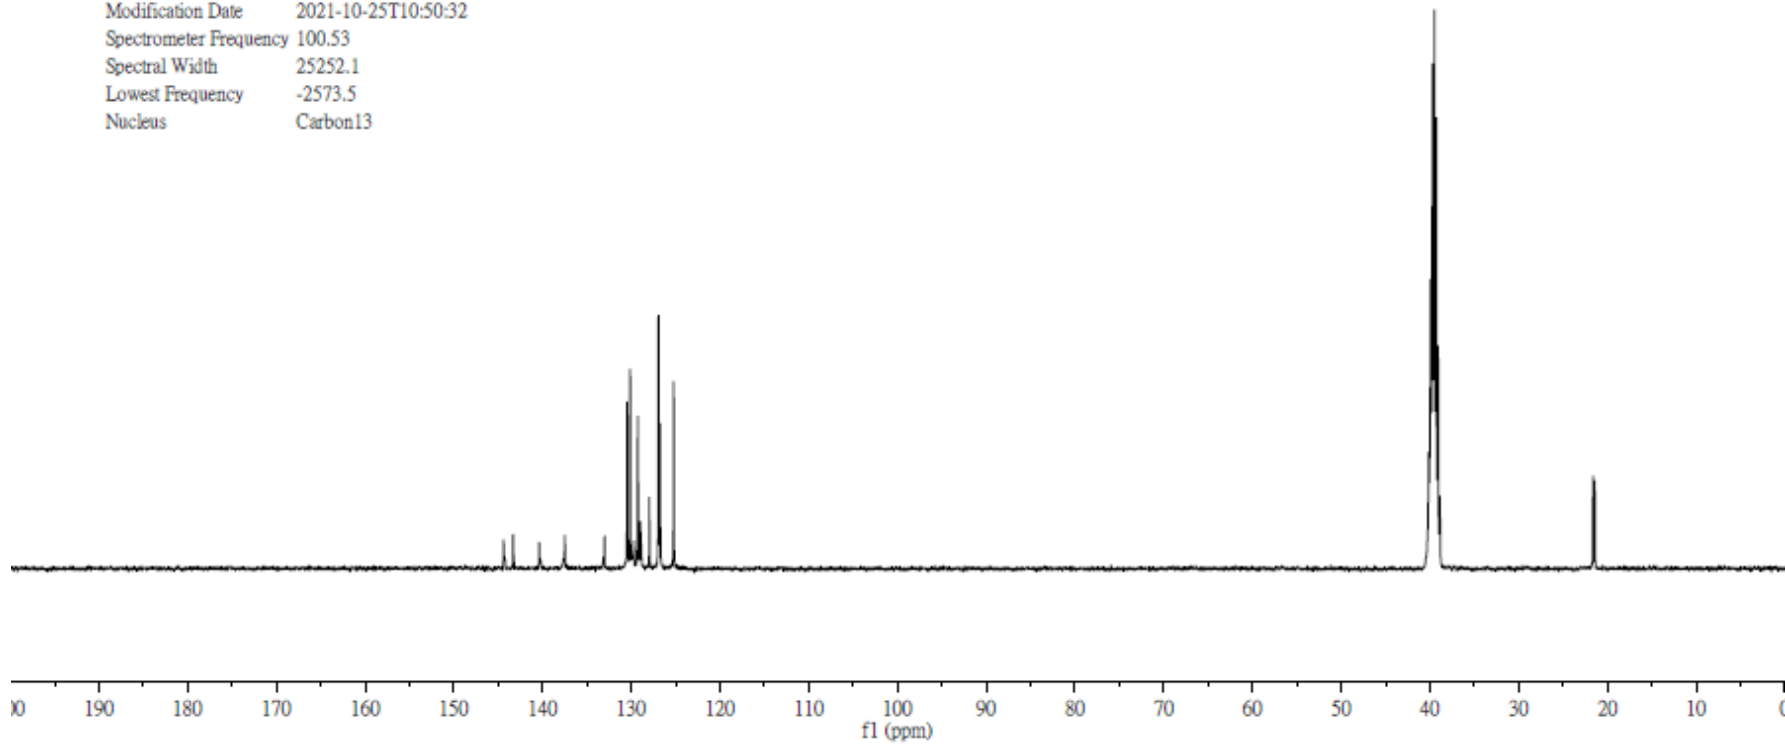

10.7838

7.7544  
7.7468  
7.7442  
7.7408  
7.7377  
7.7341  
7.7303  
7.3194  
7.3161  
7.3078  
6.8809  
6.8939

2.7157  
2.6968  
2.6779  
2.6589  
2.5000  
2.5007  
2.5003  
2.4958  
2.4916  
2.2261

1.2623  
1.2433  
1.2243

| Parameter              | Value  |
|------------------------|--------|
| Origin                 | Varian |
| Spectrometer           | nmrs   |
| Solvent                | dmsd   |
| Temperature            | 20.0   |
| Pulse Sequence         | s2pul  |
| Experiment             | 1D     |
| Number of Scans        | 12     |
| Receiver Gain          | 30     |
| Relaxation Delay       | 1.0000 |
| Pulse Width            | 0.0000 |
| Acquisition Time       | 2.5559 |
| Spectrometer Frequency | 399.76 |
| Spectral Width         | 6410.3 |
| Lowest Frequency       | -806.6 |
| Nucleus                | 1H     |

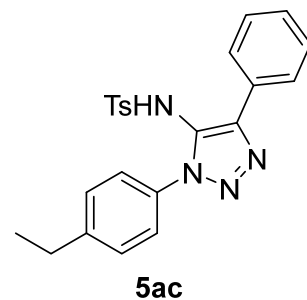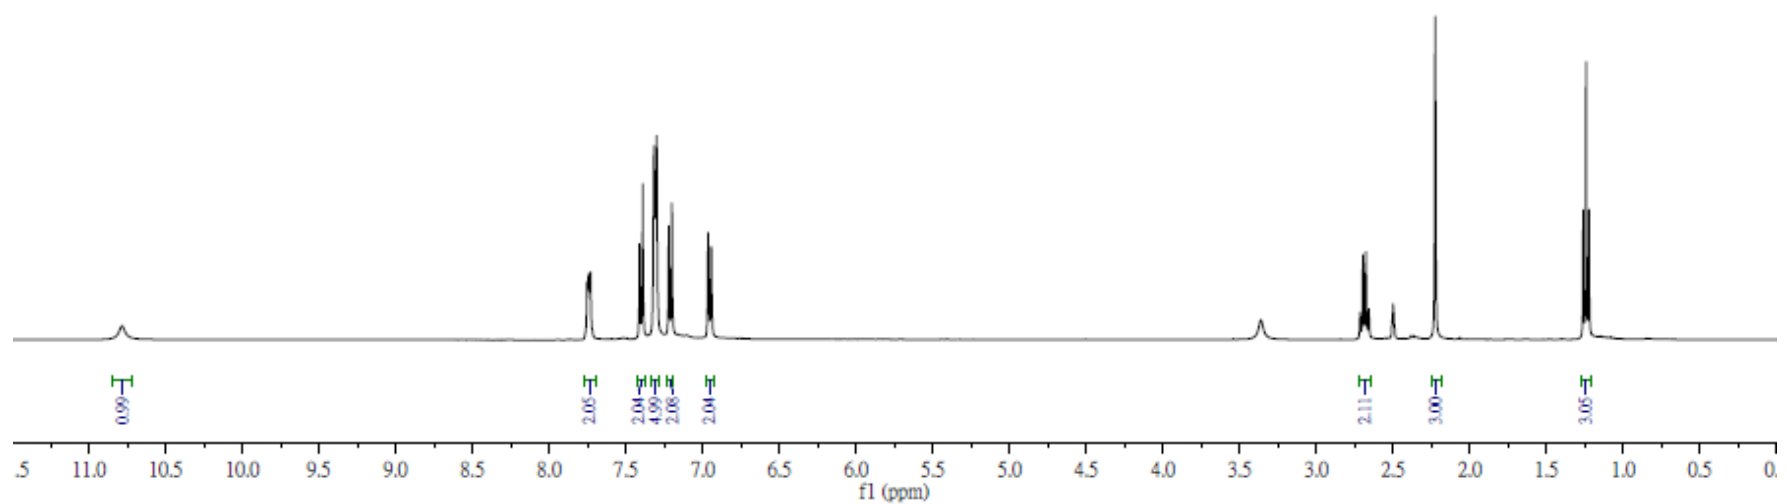

145.21  
143.19  
142.26  
137.02  
132.73  
129.38  
129.30  
128.40  
128.35  
127.90  
127.06  
126.14  
124.55

40.13  
39.92  
39.71  
39.50  
39.29  
39.08  
38.87  
27.76  
20.91  
15.27

| Parameter              | Value               |
|------------------------|---------------------|
| Origin                 | JEOL                |
| Spectrometer           | ECA                 |
| Solvent                | DMSO                |
| Temperature            |                     |
| Experiment             | 1D                  |
| Number of Scans        | 184                 |
| Receiver Gain          |                     |
| Relaxation Delay       | 2.0000              |
| Pulse Width            | 4.6000              |
| Acquisition Time       | 0.6336              |
| Modification Date      | 2021-10-24T18:37:17 |
| Spectrometer Frequency | 100.53              |
| Spectral Width         | 25252.1             |
| Lowest Frequency       | -2573.5             |
| Nucleus                | Carbon13            |

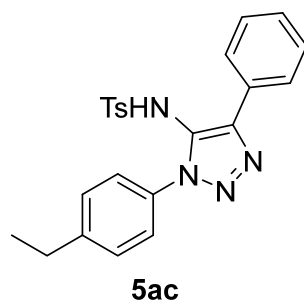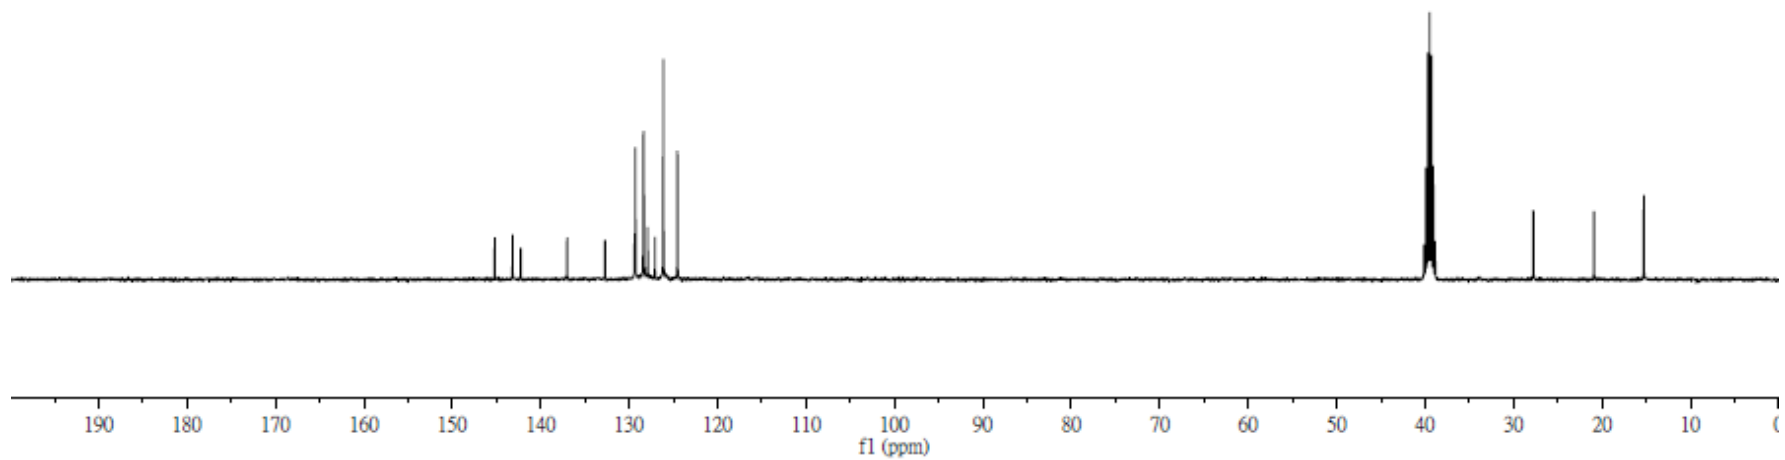

7.8164  
7.8174  
7.8174  
7.8100  
7.8076  
7.8049  
7.8013  
7.7978  
7.7953  
7.7921  
7.7891  
7.4681  
7.4454  
7.4052  
7.0773  
7.0690  
7.0188  
7.0131  
7.0060  
7.0045  
7.0020  
6.9962  
6.9878

3.9049

2.2043  
2.0614  
2.0559  
2.0504  
2.0449  
2.0394

| Parameter              | Value          |
|------------------------|----------------|
| Origin                 | Varian         |
| Spectrometer           | nmrs           |
| Solvent                | acetone        |
| Temperature            | 30.0           |
| Pulse Sequence         | s2pul          |
| Experiment             | 1D             |
| Number of Scans        | 68             |
| Receiver Gain          | 46             |
| Relaxation Delay       | 1.0000         |
| Pulse Width            | 0.0000         |
| Acquisition Time       | 2.5559         |
| Spectrometer Frequency | 399.76         |
| Spectral Width         | 6410.3         |
| Lowest Frequency       | -800.6         |
| Nucleus                | <sup>1</sup> H |

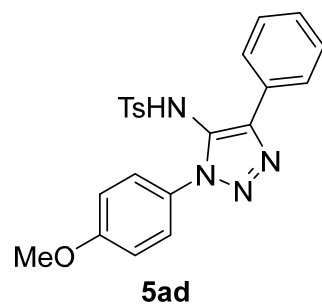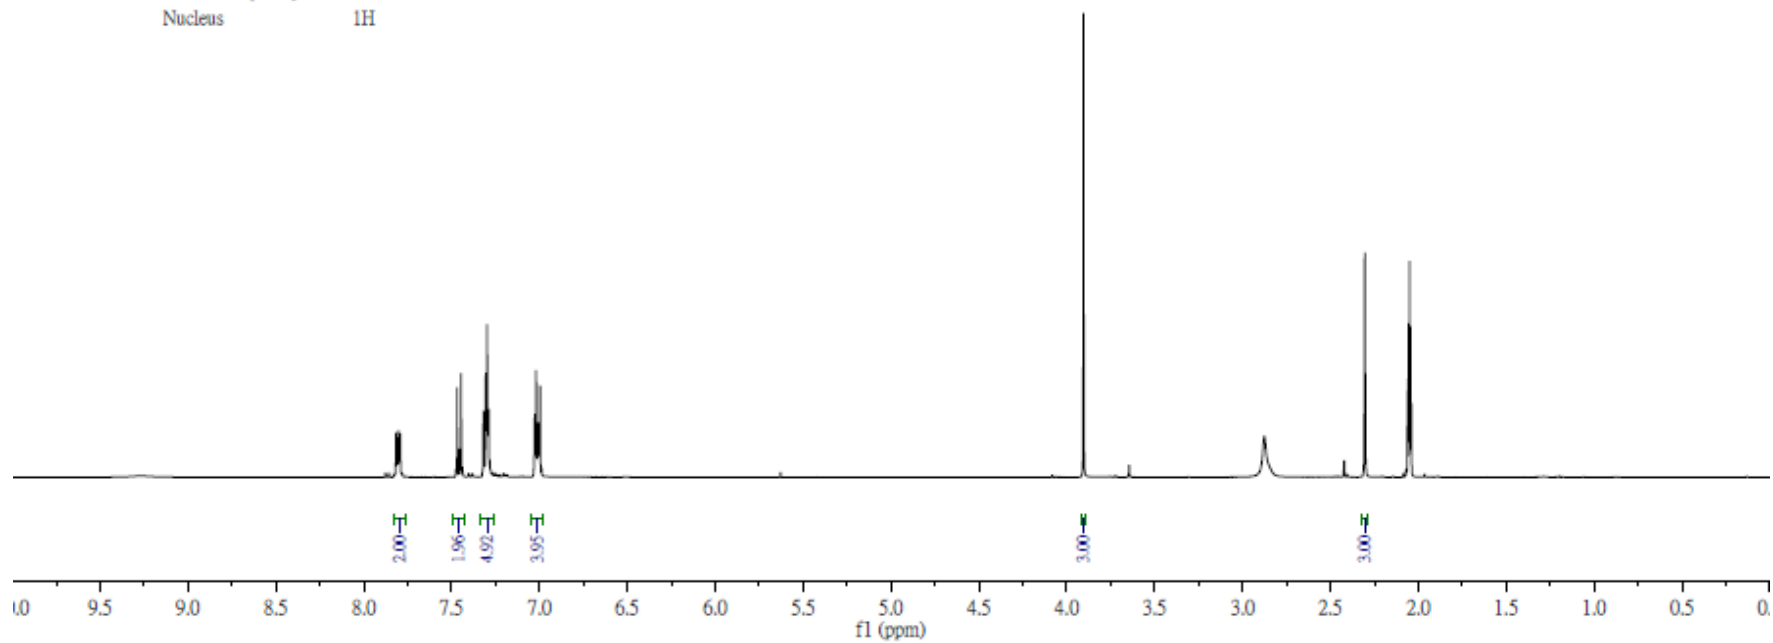

| Parameter              | Value               |
|------------------------|---------------------|
| Origin                 | JEOL                |
| Spectrometer           | NCHU                |
| Solvent                | DMSO                |
| Temperature            |                     |
| Experiment             | 1D                  |
| Number of Scans        | 3454                |
| Receiver Gain          |                     |
| Relaxation Delay       | 2.0000              |
| Pulse Width            | 4.6000              |
| Acquisition Time       | 0.6336              |
| Modification Date      | 2022-01-09T15:46:45 |
| Spectrometer Frequency | 100.53              |
| Spectral Width         | 25252.1             |
| Lowest Frequency       | -2622.7             |
| Nucleus                | Carbon13            |

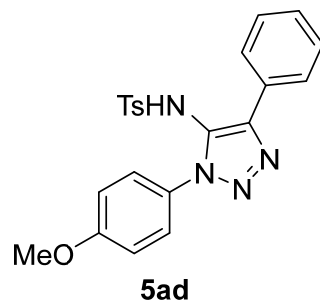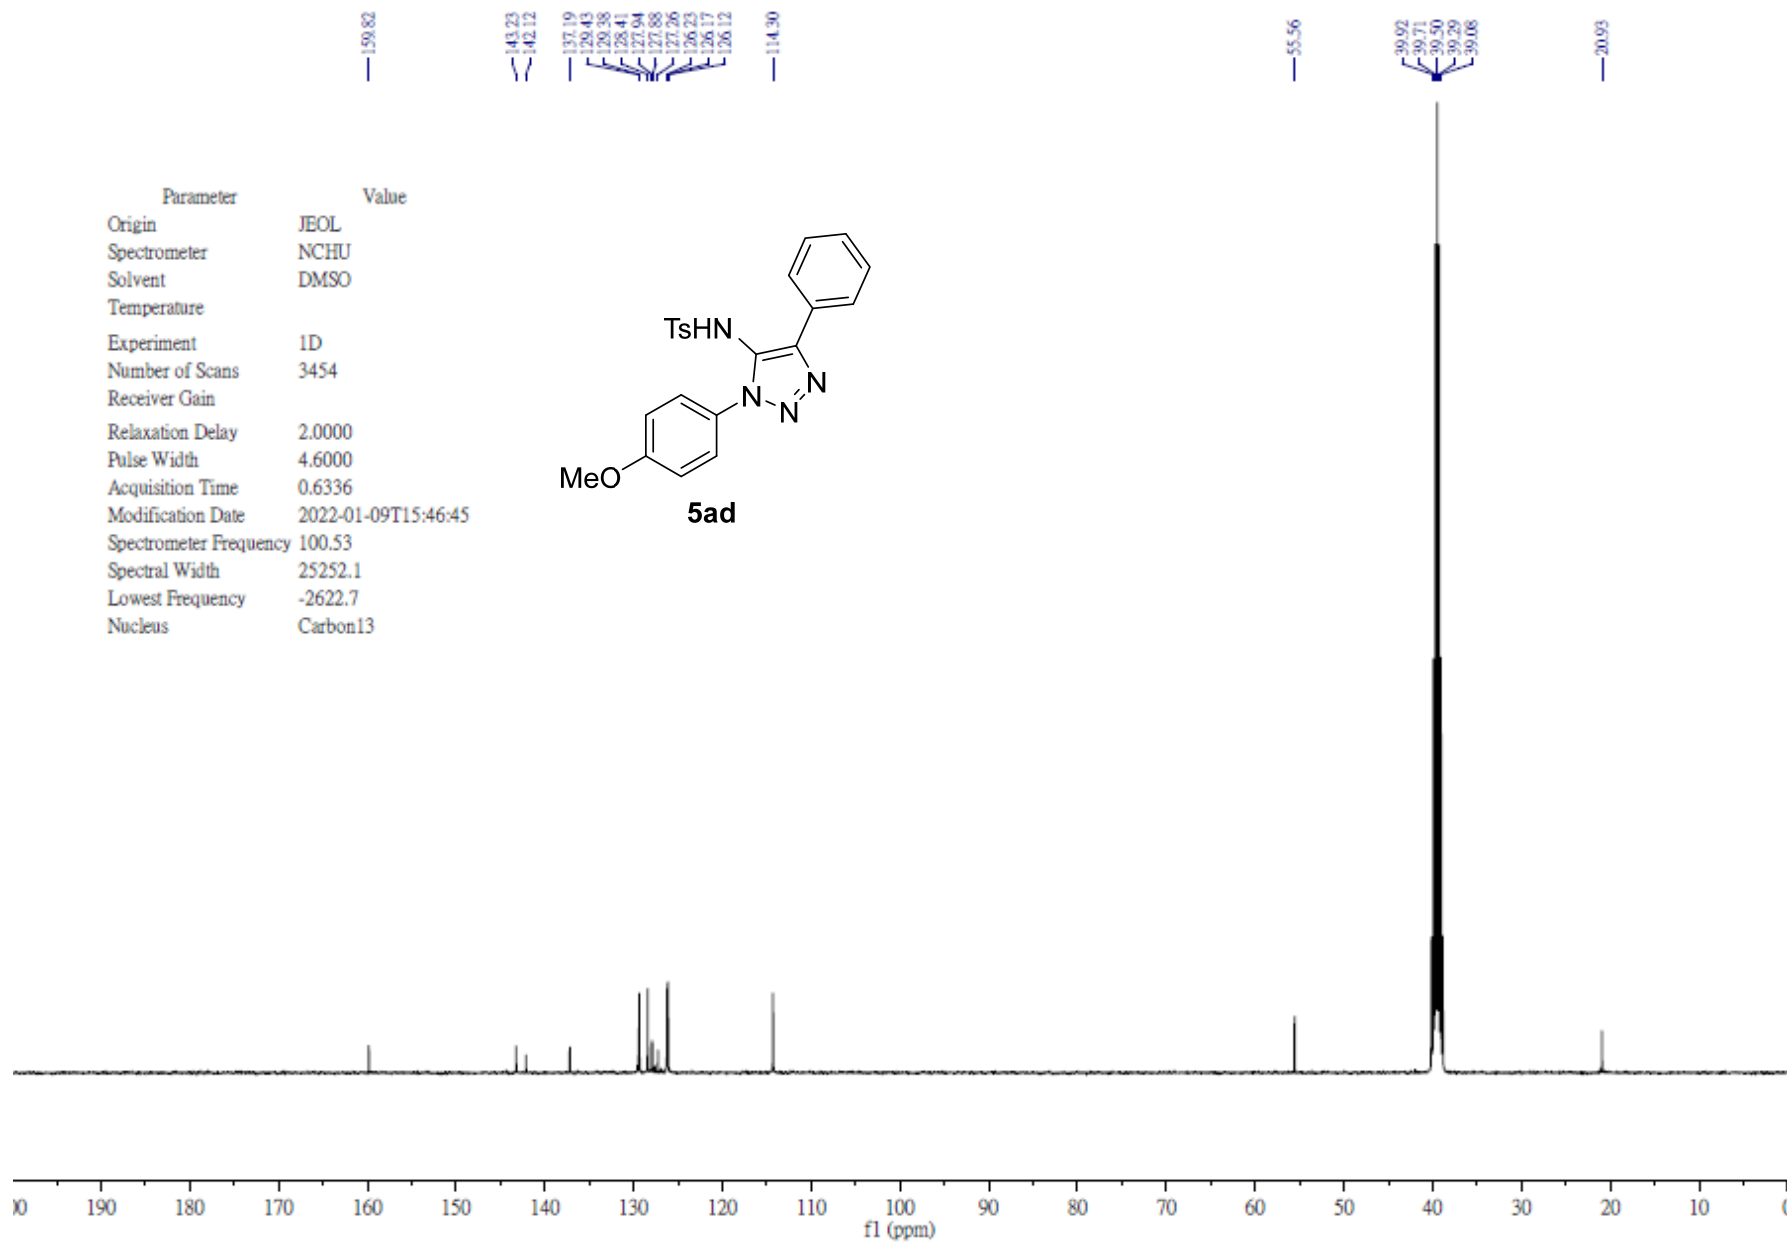



7.8300  
7.8271  
7.8202  
7.8167  
7.8145  
7.8101  
7.8066  
7.6225  
7.6157  
7.6102  
7.5991  
7.5933  
7.5868  
7.5466  
7.5400  
7.5343  
7.5231  
7.5176  
7.5108  
7.3357  
7.3301  
7.3200  
7.3181  
7.3148  
7.3066  
7.3046  
7.0469  
7.0456  
7.0257  
7.0242

| Parameter              | Value          |
|------------------------|----------------|
| Origin                 | Varian         |
| Spectrometer           | nmrs           |
| Solvent                | acetone        |
| Temperature            | 20.0           |
| Pulse Sequence         | s2pul          |
| Experiment             | 1D             |
| Number of Scans        | 68             |
| Receiver Gain          | 52             |
| Relaxation Delay       | 1.0000         |
| Pulse Width            | 0.0000         |
| Acquisition Time       | 2.5559         |
| Spectrometer Frequency | 399.76         |
| Spectral Width         | 6410.3         |
| Lowest Frequency       | -806.6         |
| Nucleus                | <sup>1</sup> H |

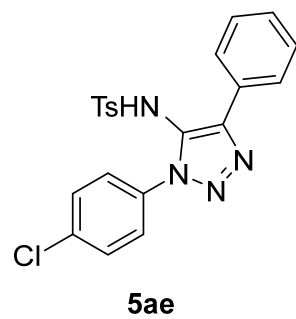

2.3259  
2.0614  
2.0559  
2.0000  
2.0049  
2.0394

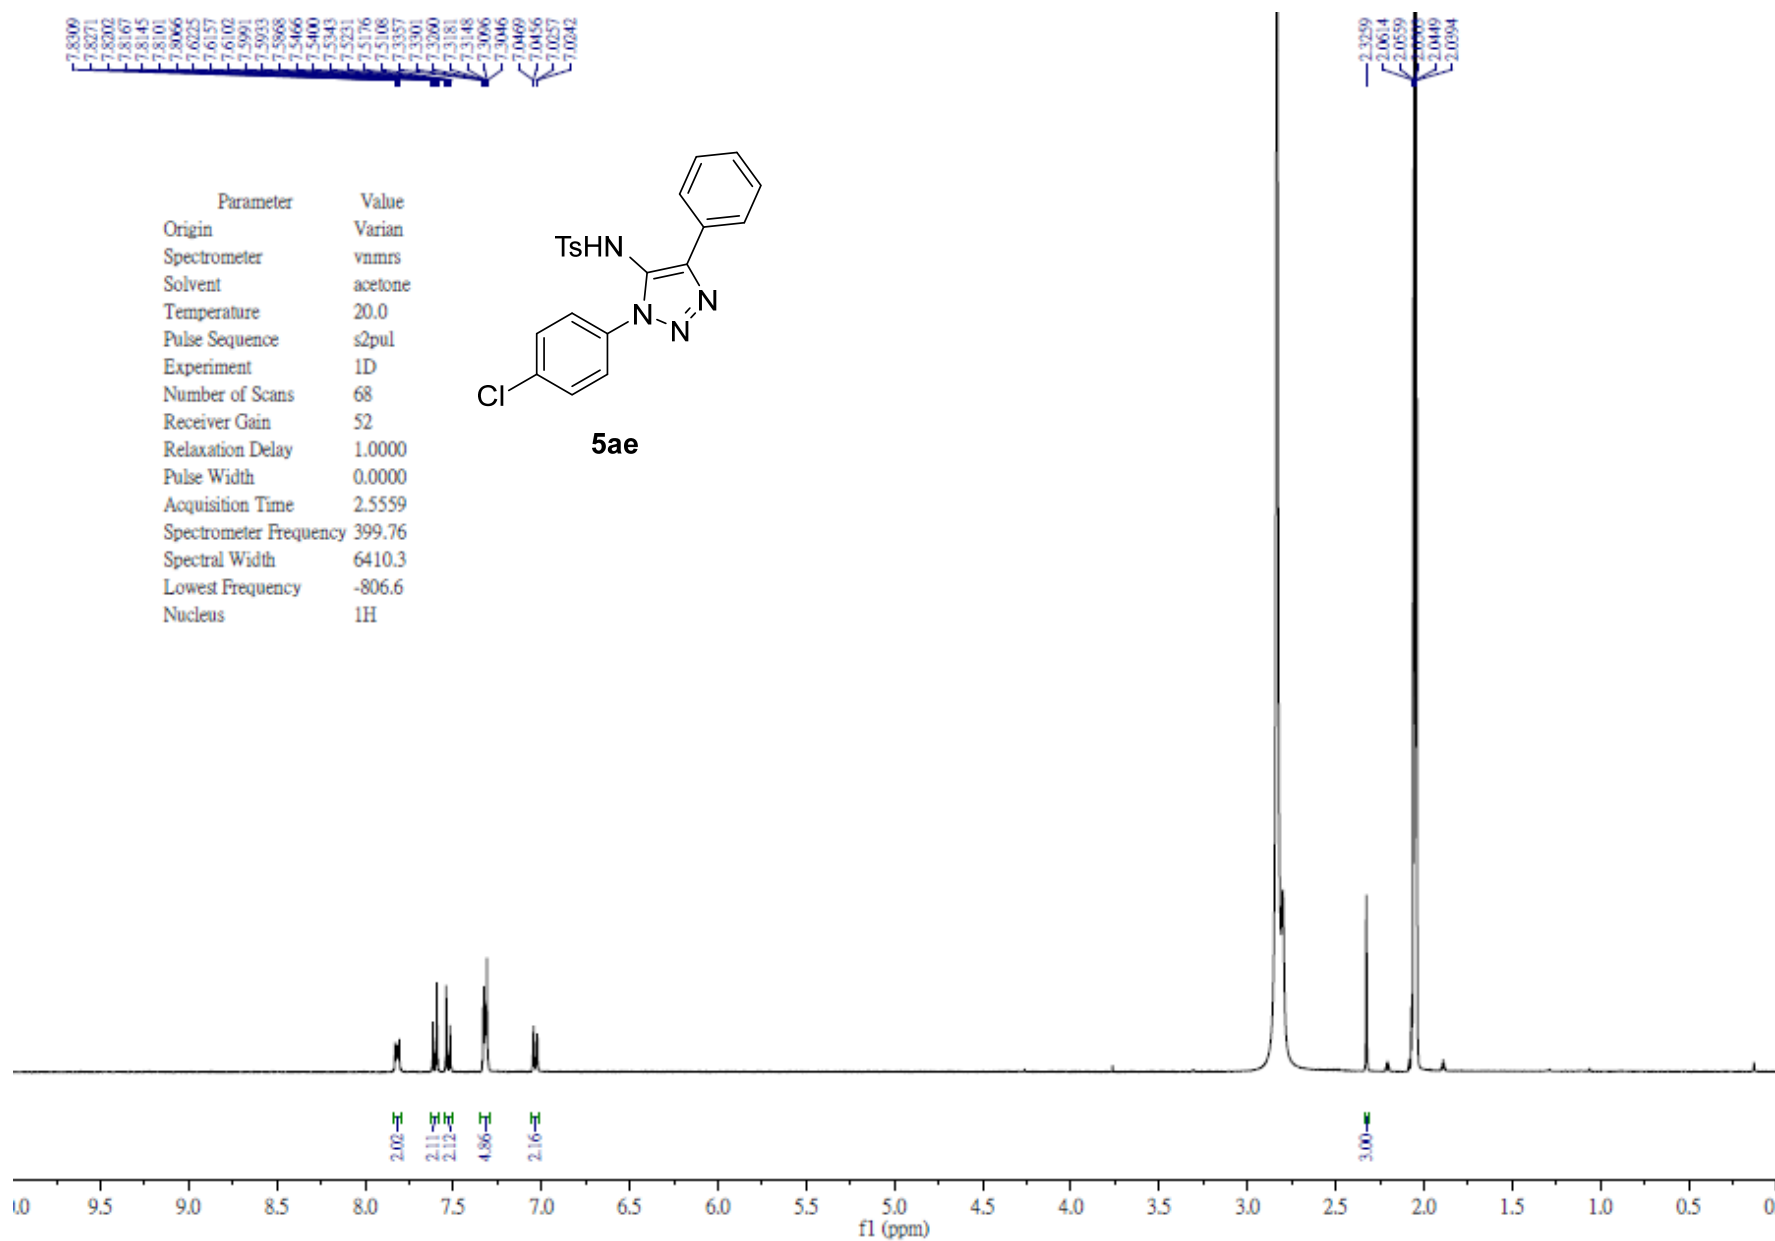

143.46  
142.43  
136.93  
134.16  
133.72  
128.39  
128.28  
128.14  
128.42  
128.11  
127.26  
126.31  
126.14

40.13  
39.92  
39.71  
39.50  
39.29  
39.08  
38.87

20.96

| Parameter              | Value               |
|------------------------|---------------------|
| Origin                 | JBOL                |
| Spectrometer           | ECA                 |
| Solvent                | DMSO                |
| Temperature            |                     |
| Experiment             | 1D                  |
| Number of Scans        | 1359                |
| Receiver Gain          |                     |
| Relaxation Delay       | 2.0000              |
| Pulse Width            | 4.6000              |
| Acquisition Time       | 0.6336              |
| Modification Date      | 2021-10-25T10:49:52 |
| Spectrometer Frequency | 100.53              |
| Spectral Width         | 25252.1             |
| Lowest Frequency       | -2573.5             |
| Nucleus                | Carbon13            |

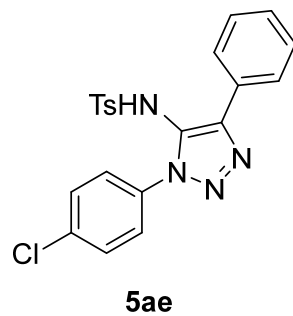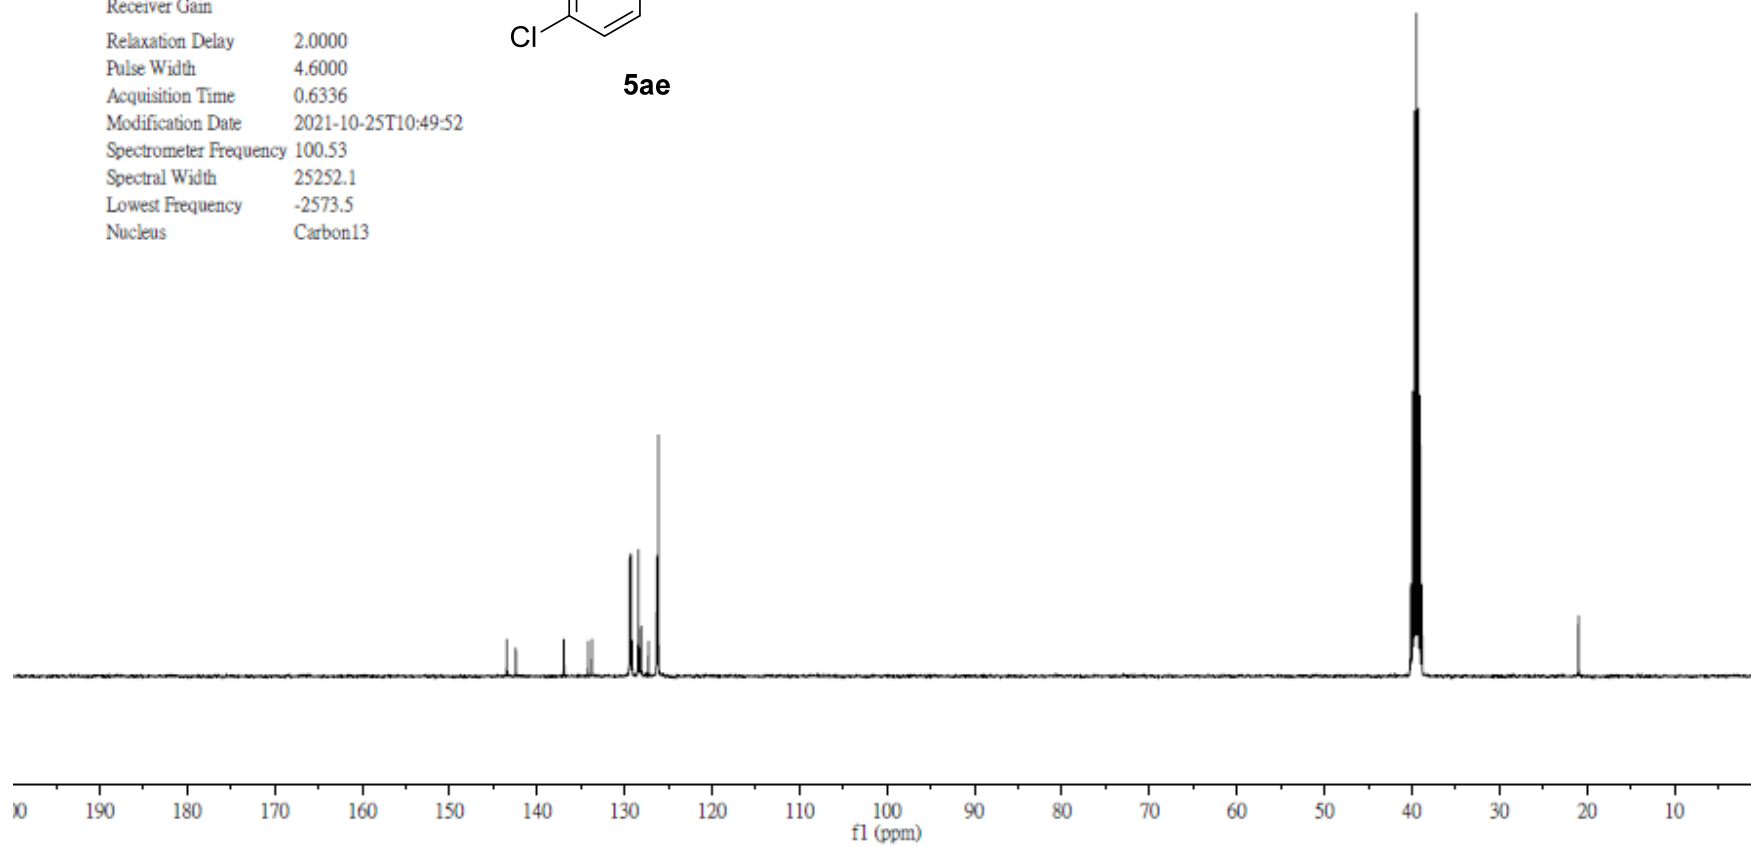

9.3147  
7.7378  
7.7341  
7.7198  
7.7142  
7.6910  
7.6304  
7.6261  
7.6245  
7.5740  
7.5644  
7.5521  
7.5467  
7.3625  
7.3584  
7.3455  
7.3415  
7.3369  
7.2985  
7.2819  
7.2767  
7.2630  
7.2489  
7.2452  
7.0252

2.2006  
2.0613  
2.0558  
2.0503  
2.0448  
2.0393

| Parameter        | Value   |
|------------------|---------|
| Origin           | Varian  |
| Spectrometer     | nmrs    |
| Solvent          | acetone |
| Temperature      | 20.0    |
| Pulse Sequence   | s2pul   |
| Experiment       | 1D      |
| Number of Scans  | 20      |
| Receiver Gain    | 56      |
| Relaxation Delay | 1.0000  |
| Pulse Width      | 0.0000  |
| Acquisition Time | 2.5559  |
| Spectrometer     | 399.76  |
| Frequency        |         |
| Spectral Width   | 6410.3  |
| Lowest Frequency | -806.6  |
| Nuclens          | 1H      |

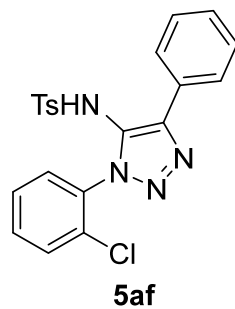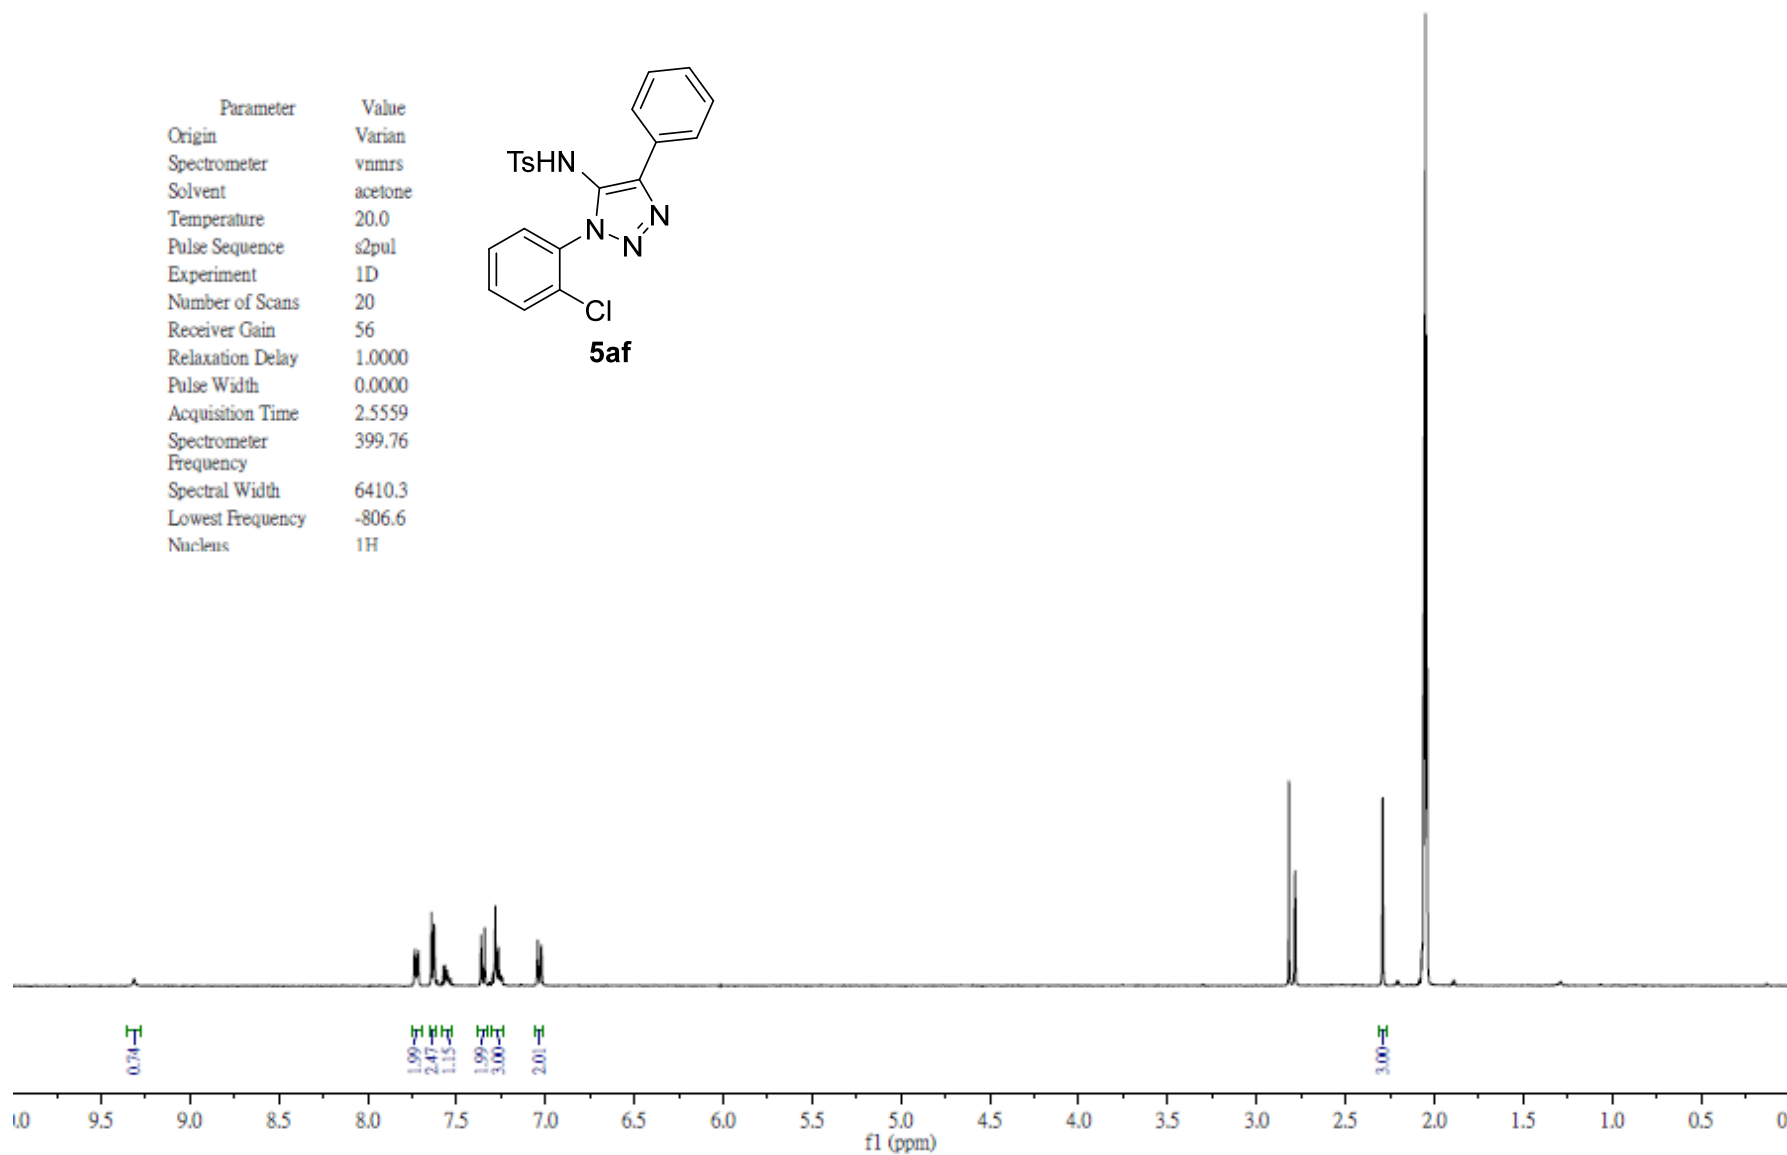

143.38  
141.13  
136.80  
132.39  
131.97  
130.44  
130.10  
129.36  
128.97  
128.75  
128.28  
127.92  
127.89  
126.15  
126.12

40.13  
39.92  
39.71  
39.50  
39.29  
39.08  
38.87

20.88

| Parameter              | Value               |
|------------------------|---------------------|
| Origin                 | JEOL                |
| Spectrometer           | ECA                 |
| Solvent                | DMSO                |
| Temperature            |                     |
| Experiment             | 1D                  |
| Number of Scans        | 339                 |
| Receiver Gain          |                     |
| Relaxation Delay       | 2.0000              |
| Pulse Width            | 4.6000              |
| Acquisition Time       | 0.6336              |
| Modification Date      | 2021-10-24T18:36:06 |
| Spectrometer Frequency | 100.53              |
| Spectral Width         | 25252.1             |
| Lowest Frequency       | -2573.5             |
| Nucleus                | Carbon13            |

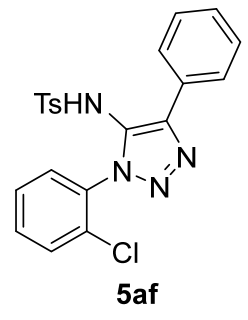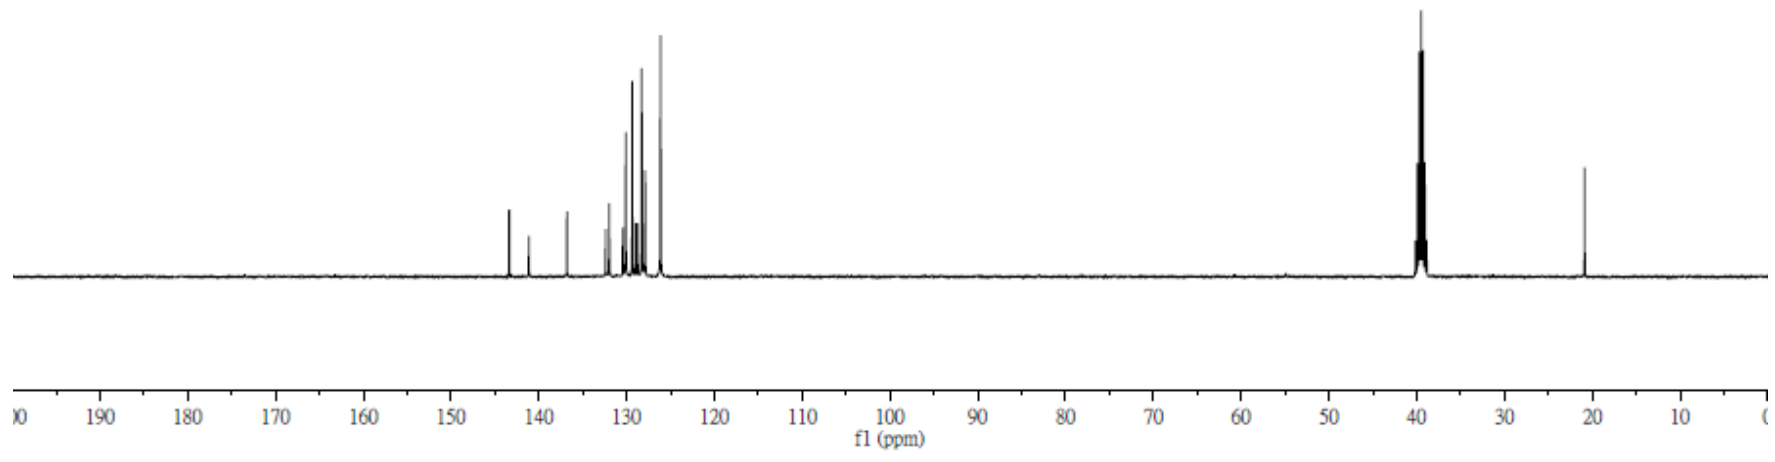

| Parameter              | Value          |
|------------------------|----------------|
| Origin                 | Varian         |
| Spectrometer           | vnmrs          |
| Solvent                | acetone        |
| Temperature            | 20.0           |
| Pulse Sequence         | s2pul          |
| Experiment             | 1D             |
| Number of Scans        | 20             |
| Receiver Gain          | 56             |
| Relaxation Delay       | 1.0000         |
| Pulse Width            | 0.0000         |
| Acquisition Time       | 2.5559         |
| Spectrometer Frequency | 399.76         |
| Spectral Width         | 6410.3         |
| Lowest Frequency       | -806.6         |
| Nucleus                | <sup>1</sup> H |

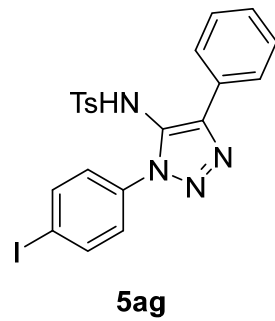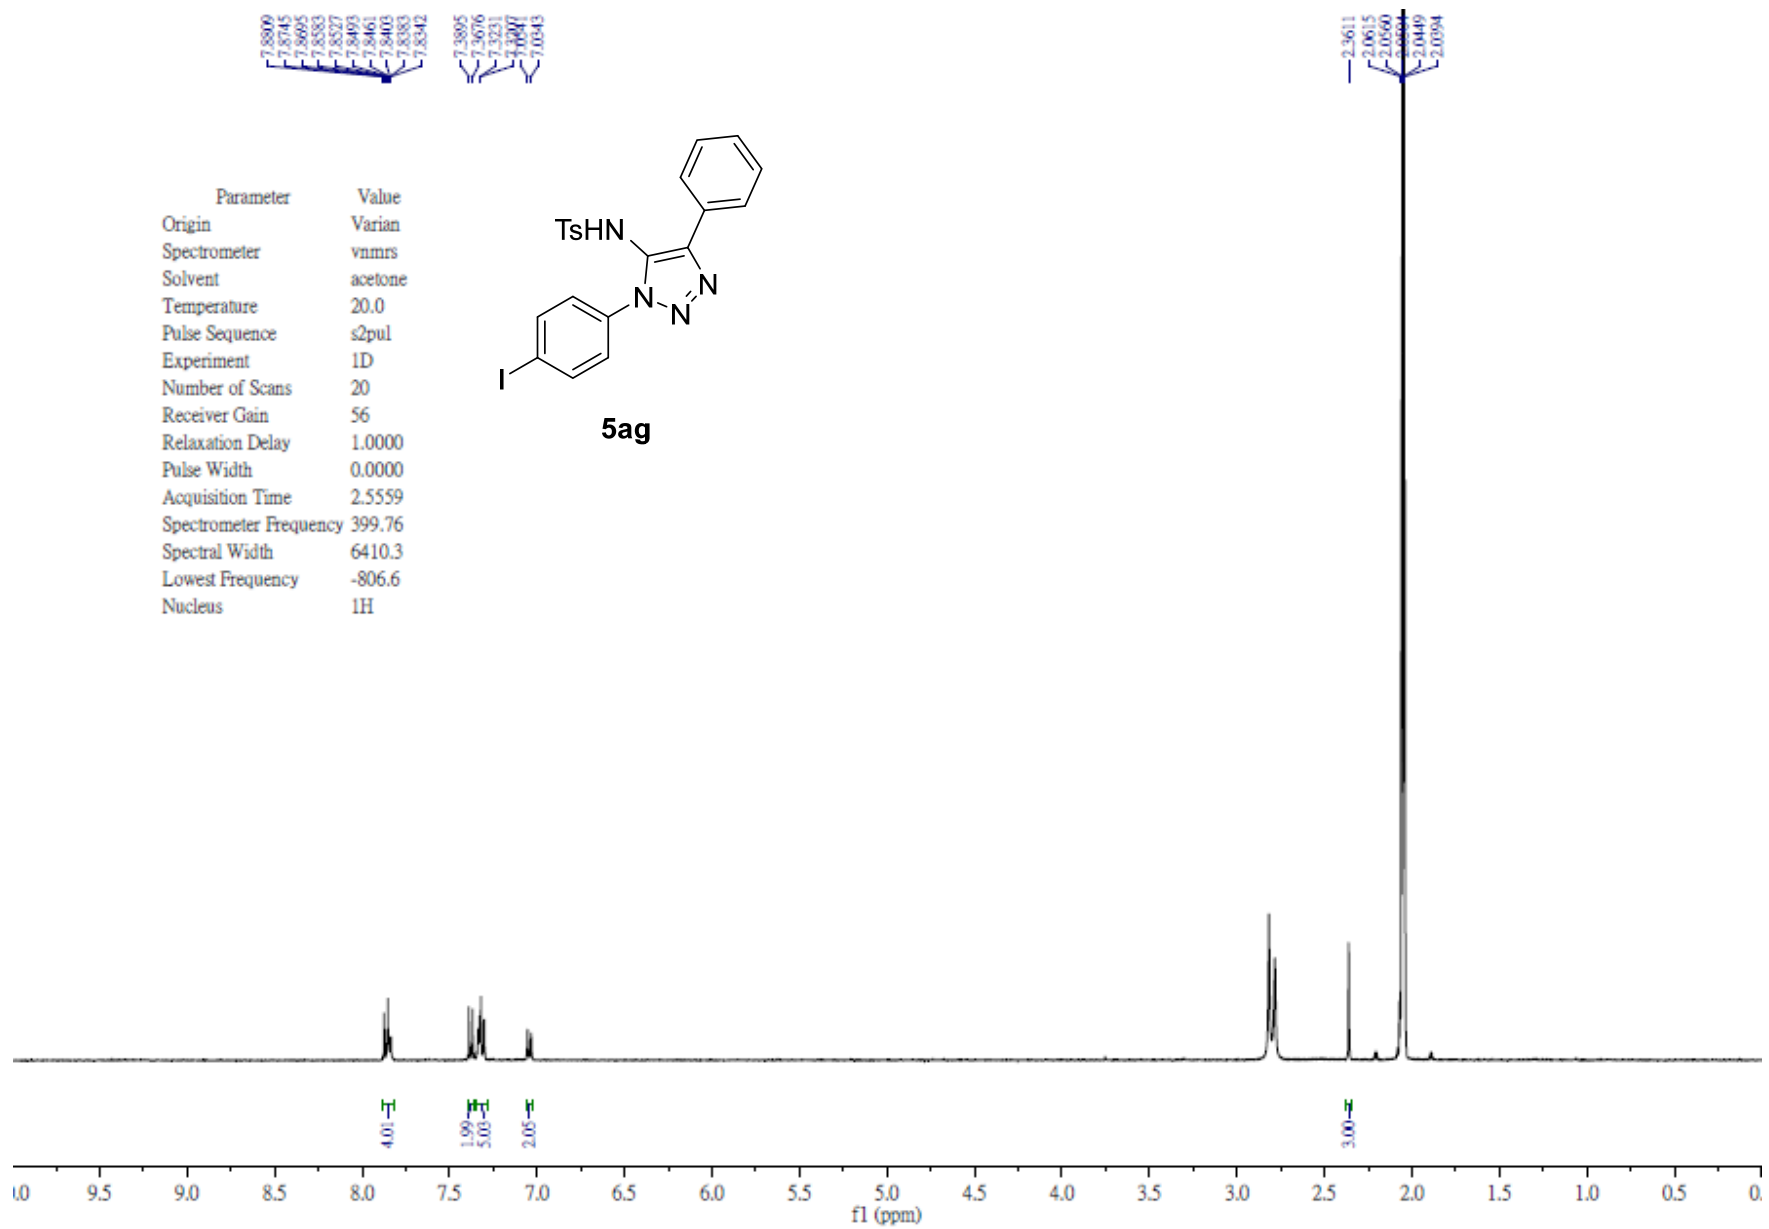

143.46  
142.52  
138.03  
136.91  
134.55  
129.40  
129.17  
128.43  
128.12  
127.10  
126.40  
126.15  
126.11

96.02

40.13  
39.92  
39.71  
39.50  
39.29  
39.08  
38.87

21.17

| Parameter              | Value               |
|------------------------|---------------------|
| Origin                 | JEOL                |
| Spectrometer           | ECA                 |
| Solvent                | DMSO                |
| Temperature            |                     |
| Experiment             | 1D                  |
| Number of Scans        | 266                 |
| Receiver Gain          |                     |
| Relaxation Delay       | 2.0000              |
| Pulse Width            | 4.6000              |
| Acquisition Time       | 0.6336              |
| Modification Date      | 2021-10-24T18:37:02 |
| Spectrometer Frequency | 100.53              |
| Spectral Width         | 25252.1             |
| Lowest Frequency       | -2573.5             |
| Nucleus                | Carbon13            |

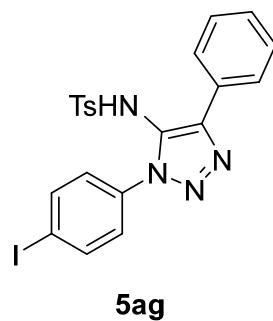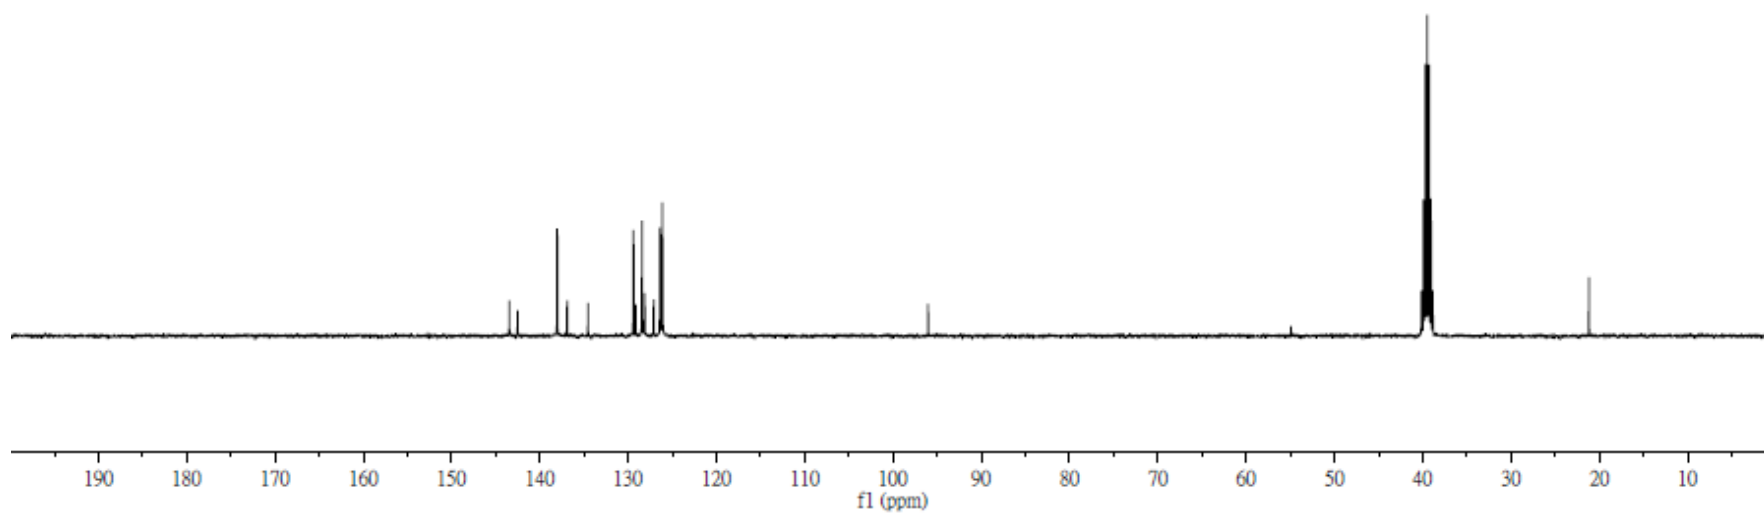

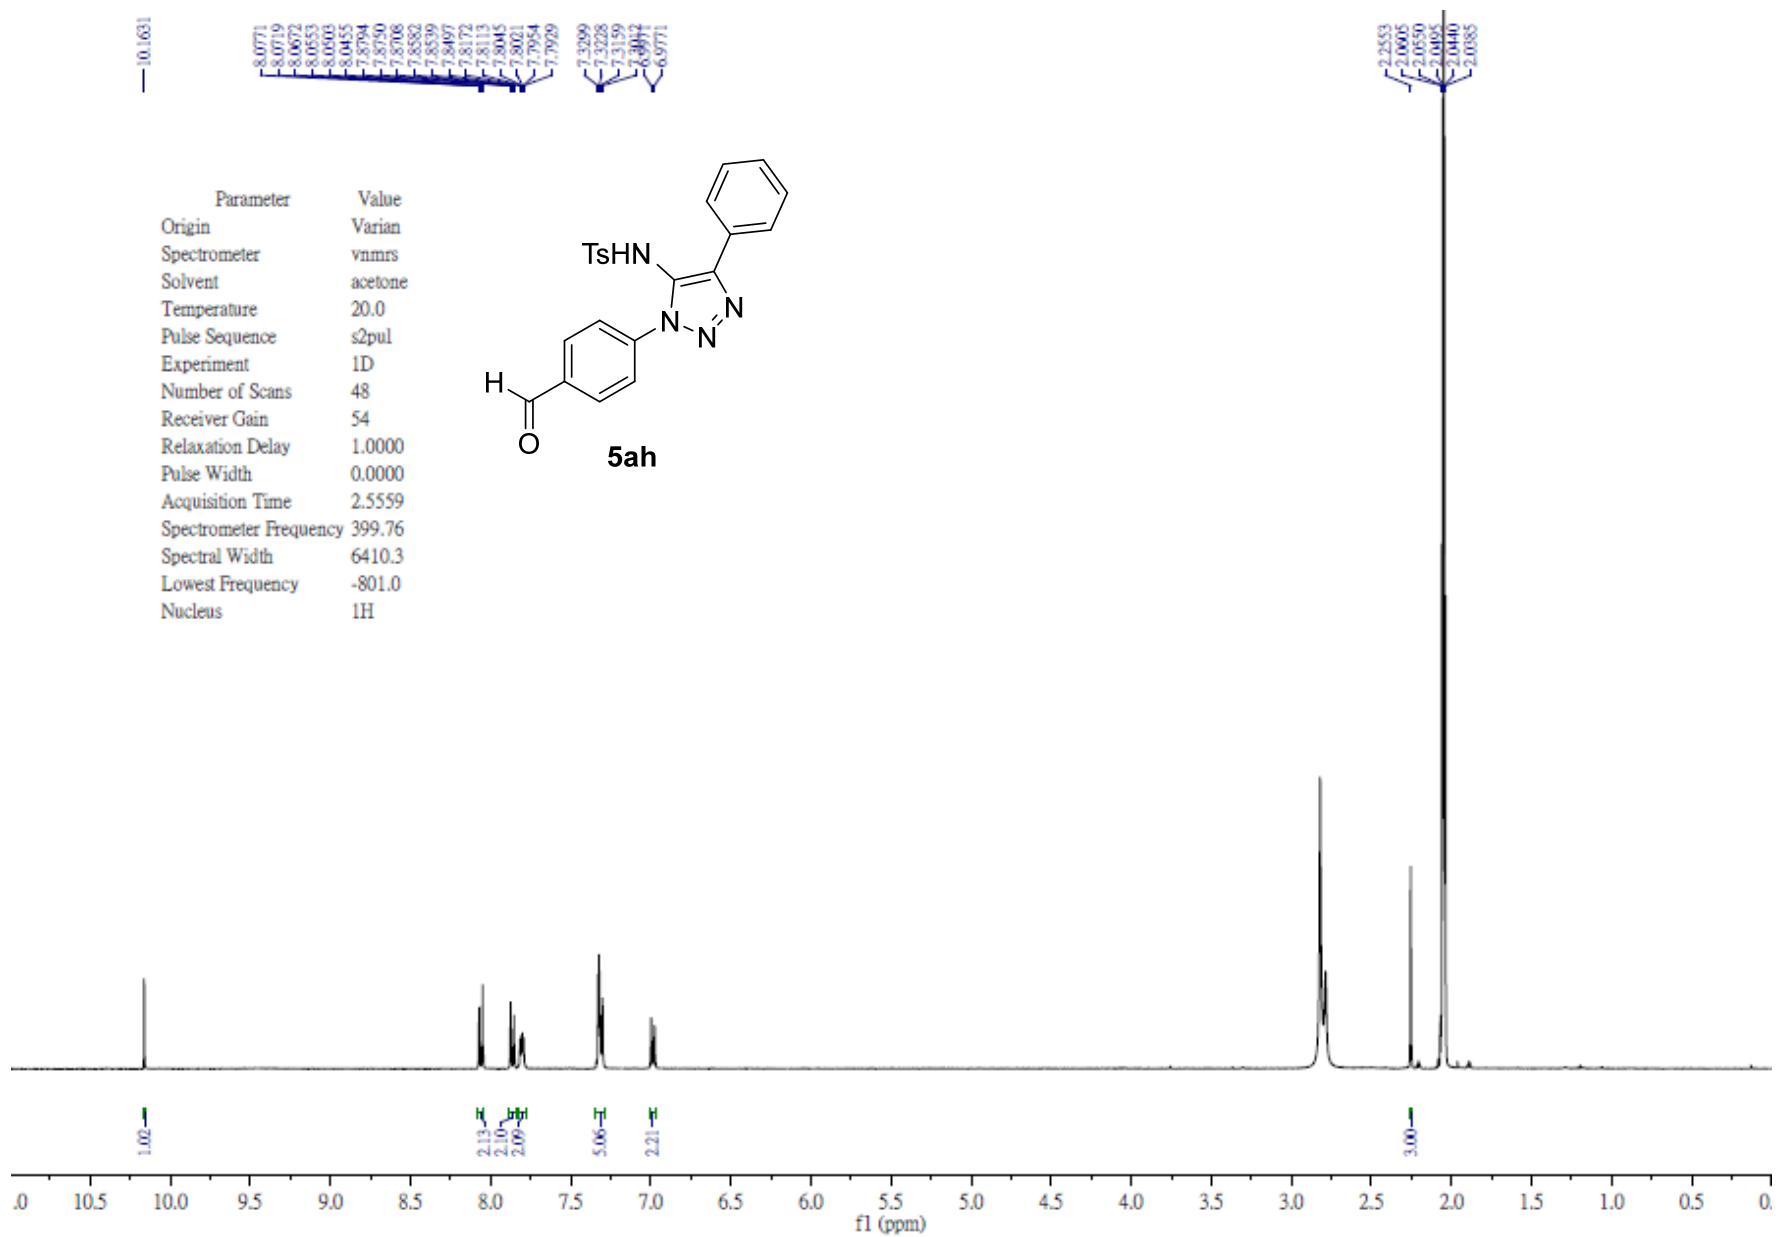

192.38

143.45  
142.65  
139.26  
136.73  
136.16  
130.39  
129.42  
128.97  
128.42  
128.17  
127.33  
126.19  
126.16  
124.95

40.13  
39.92  
39.71  
39.50  
39.29  
39.08  
38.87

20.84

| Parameter              | Value               |
|------------------------|---------------------|
| Origin                 | JEOL                |
| Spectrometer           | ECA                 |
| Solvent                | DMSO                |
| Temperature            |                     |
| Experiment             | 1D                  |
| Number of Scans        | 683                 |
| Receiver Gain          |                     |
| Relaxation Delay       | 2.0000              |
| Pulse Width            | 4.6000              |
| Acquisition Time       | 0.6336              |
| Modification Date      | 2021-10-25T10:49:26 |
| Spectrometer Frequency | 100.53              |
| Spectral Width         | 25252.1             |
| Lowest Frequency       | -2573.5             |
| Nucleus                | Carbon13            |

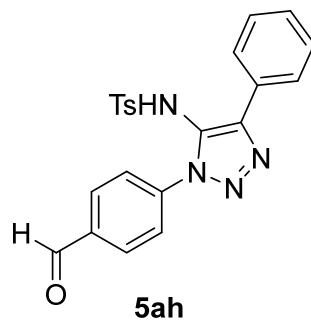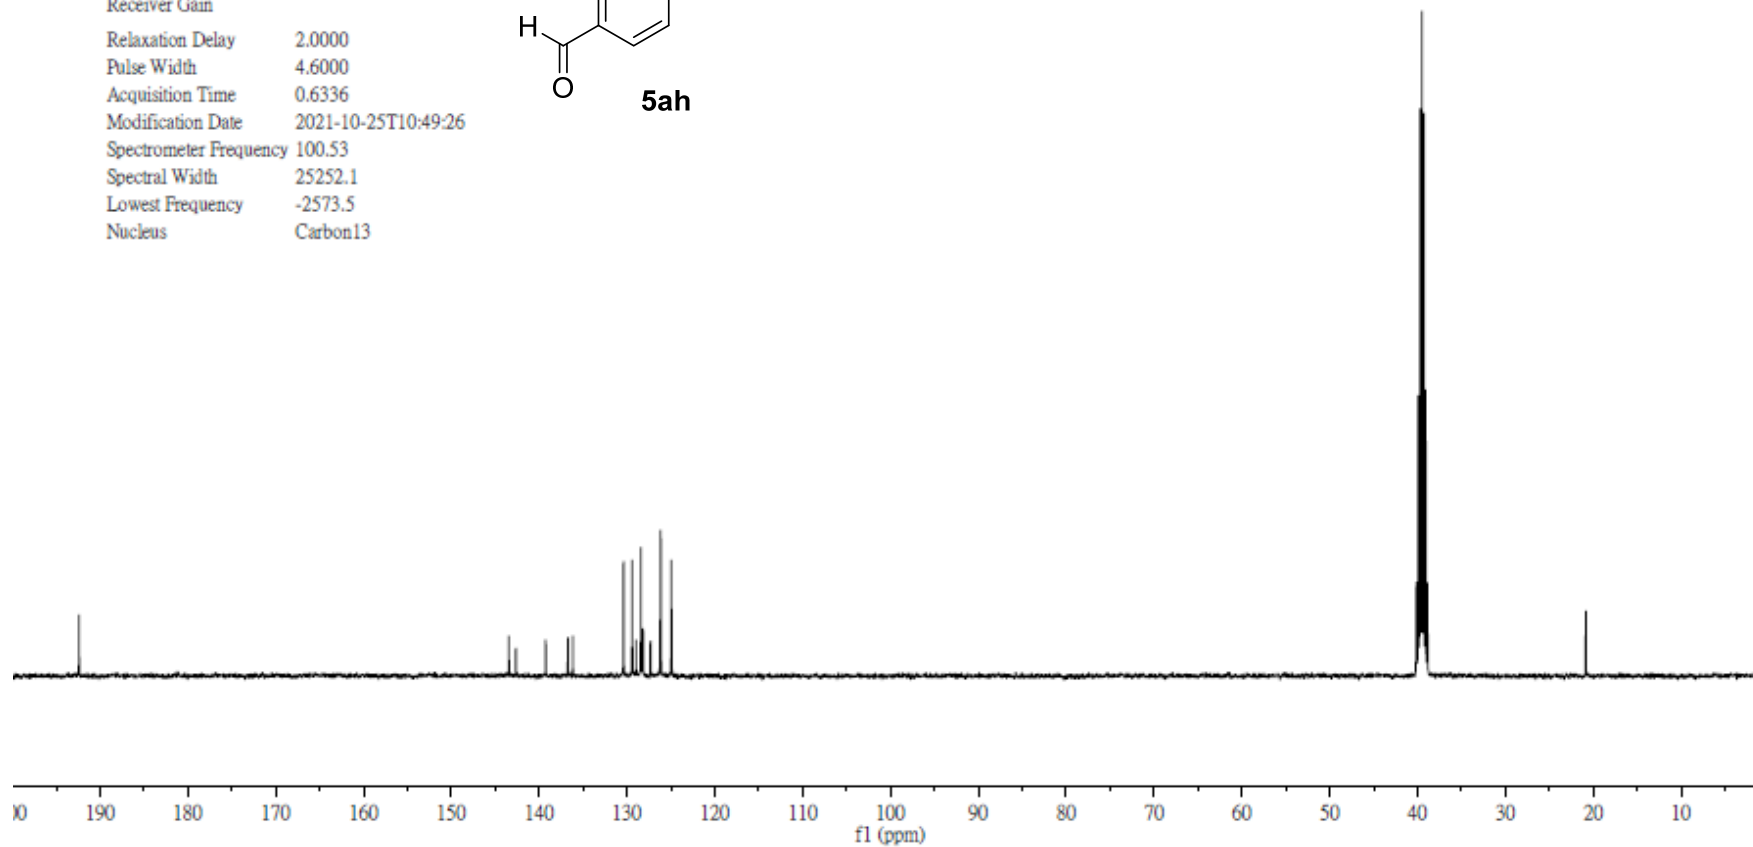



8.1060  
8.0668  
7.8319  
7.8226  
7.7579  
7.7366  
7.3379  
7.3305  
7.3106  
6.9958  
6.9726

3.9601

2.2613  
2.0902  
2.0549  
2.0495  
2.0442  
2.0390

| Parameter              | Value               |
|------------------------|---------------------|
| Origin                 | JEOL                |
| Spectrometer           | NCHU                |
| Solvent                | acetone             |
| Temperature            |                     |
| Experiment             | 1D                  |
| Number of Scans        | 8                   |
| Receiver Gain          |                     |
| Relaxation Delay       | 2.0000              |
| Pulse Width            | 3.6800              |
| Acquisition Time       | 2.4429              |
| Modification Date      | 2022-01-07T23:08:55 |
| Spectrometer Frequency | 399.78              |
| Spectral Width         | 7204.5              |
| Lowest Frequency       | -1192.4             |
| Nucleus                | Proton              |

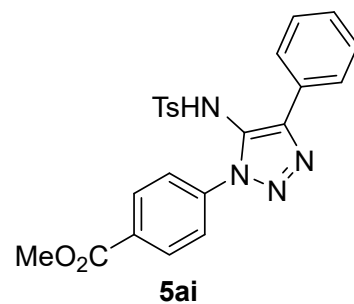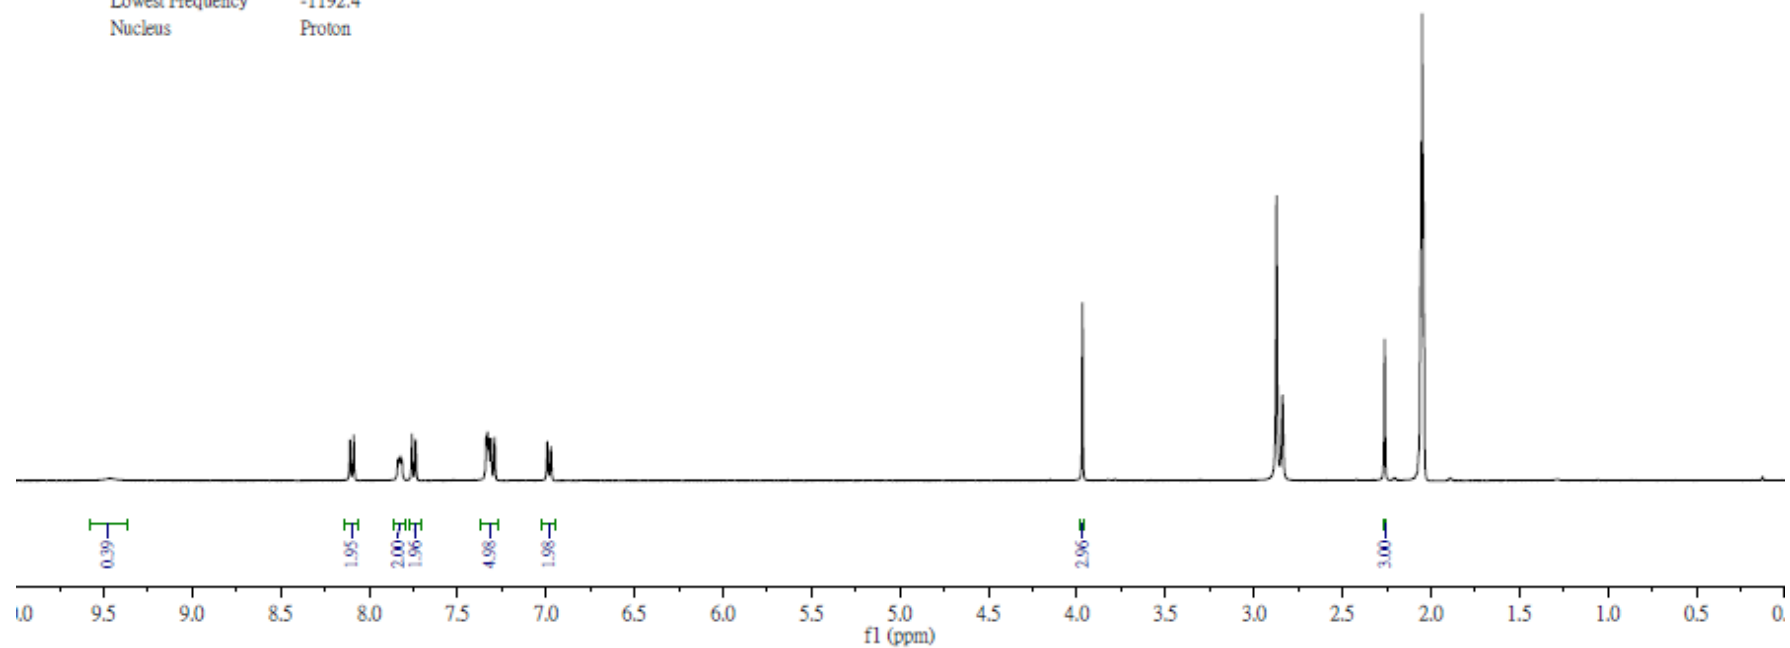

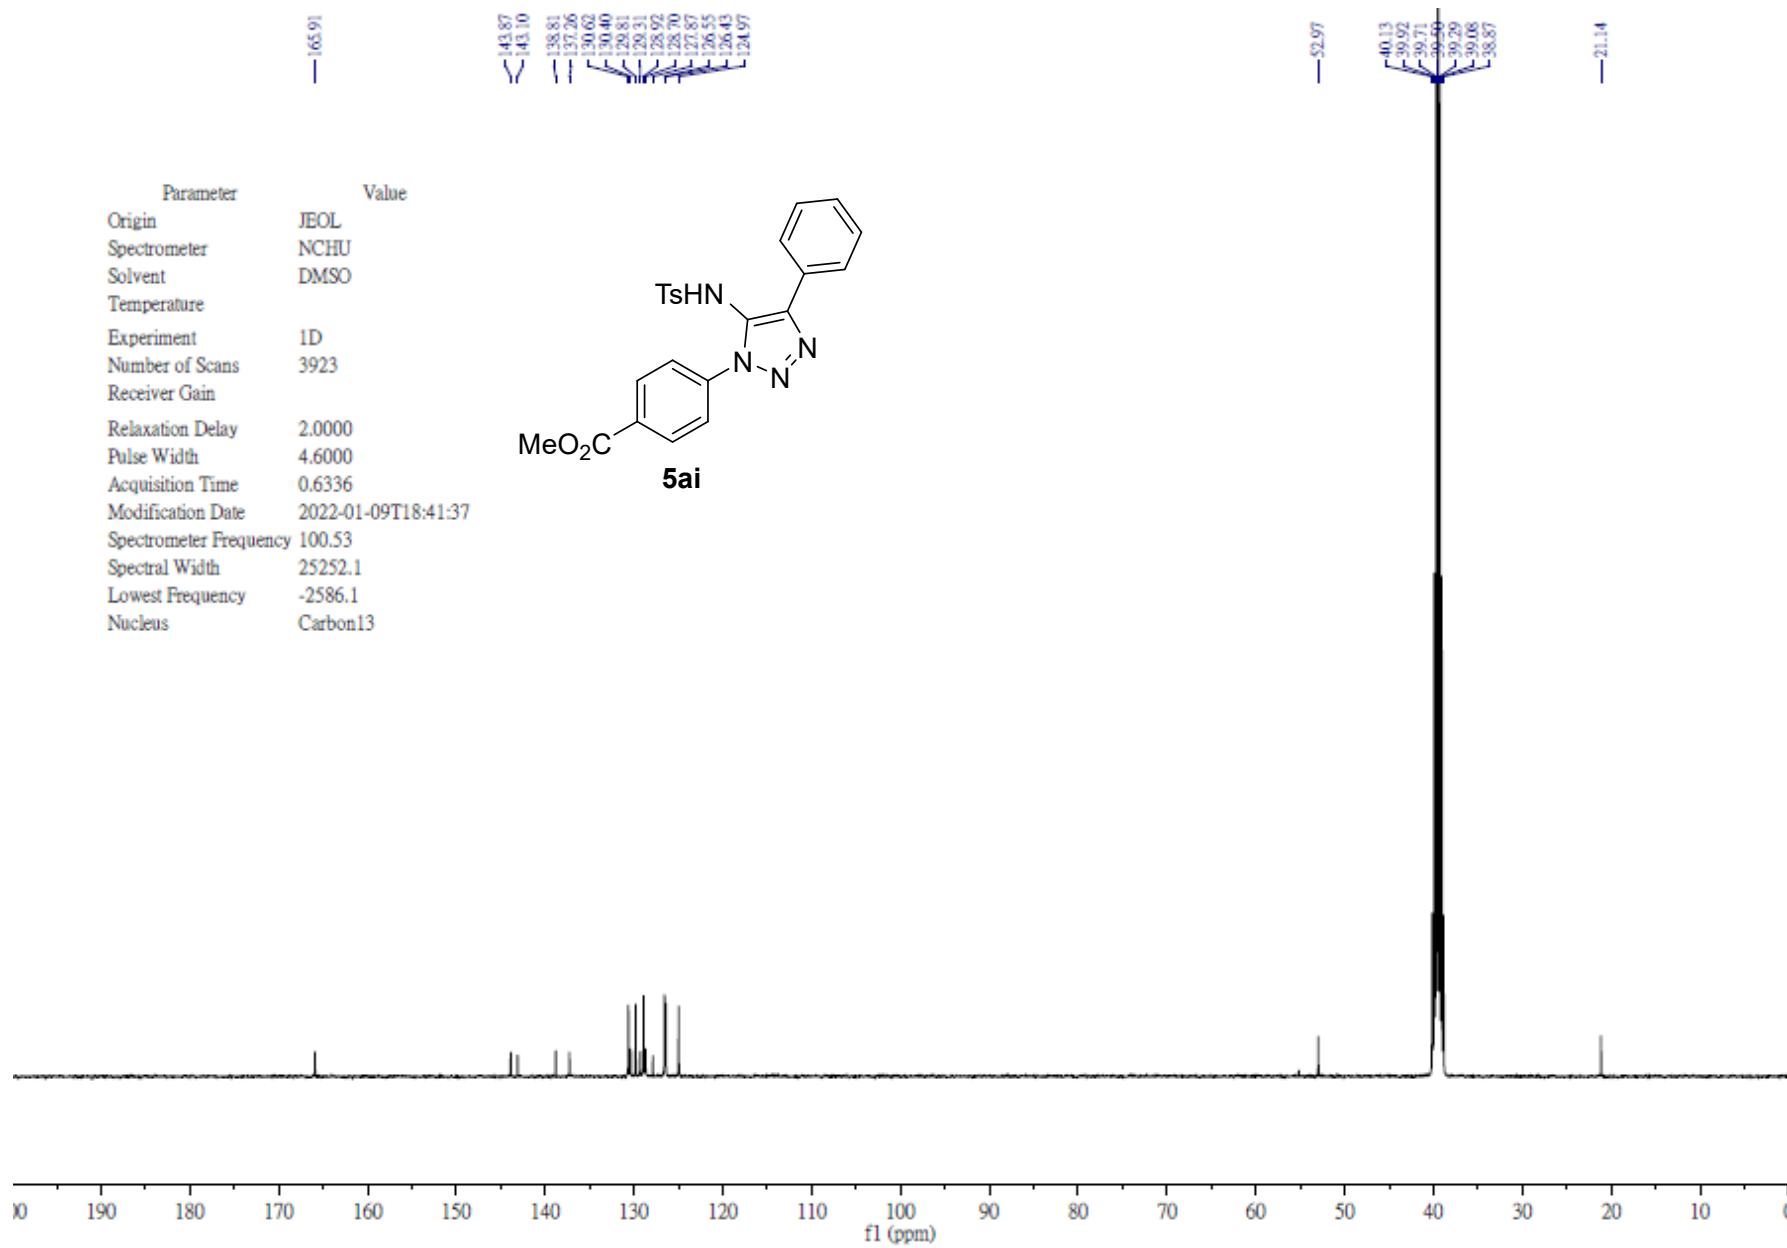

| Parameter              | Value               |
|------------------------|---------------------|
| Origin                 | JEOL                |
| Spectrometer           | ECA                 |
| Solvent                | DMSO                |
| Temperature            |                     |
| Experiment             | 1D                  |
| Number of Scans        | 8                   |
| Receiver Gain          |                     |
| Relaxation Delay       | 2.0000              |
| Pulse Width            | 3.2980              |
| Acquisition Time       | 2.4429              |
| Modification Date      | 2021-06-02T15:23:01 |
| Spectrometer Frequency | 399.78              |
| Spectral Width         | 9005.8              |
| Lowest Frequency       | -2092.2             |
| Nucleus                | Proton              |

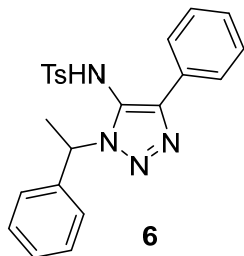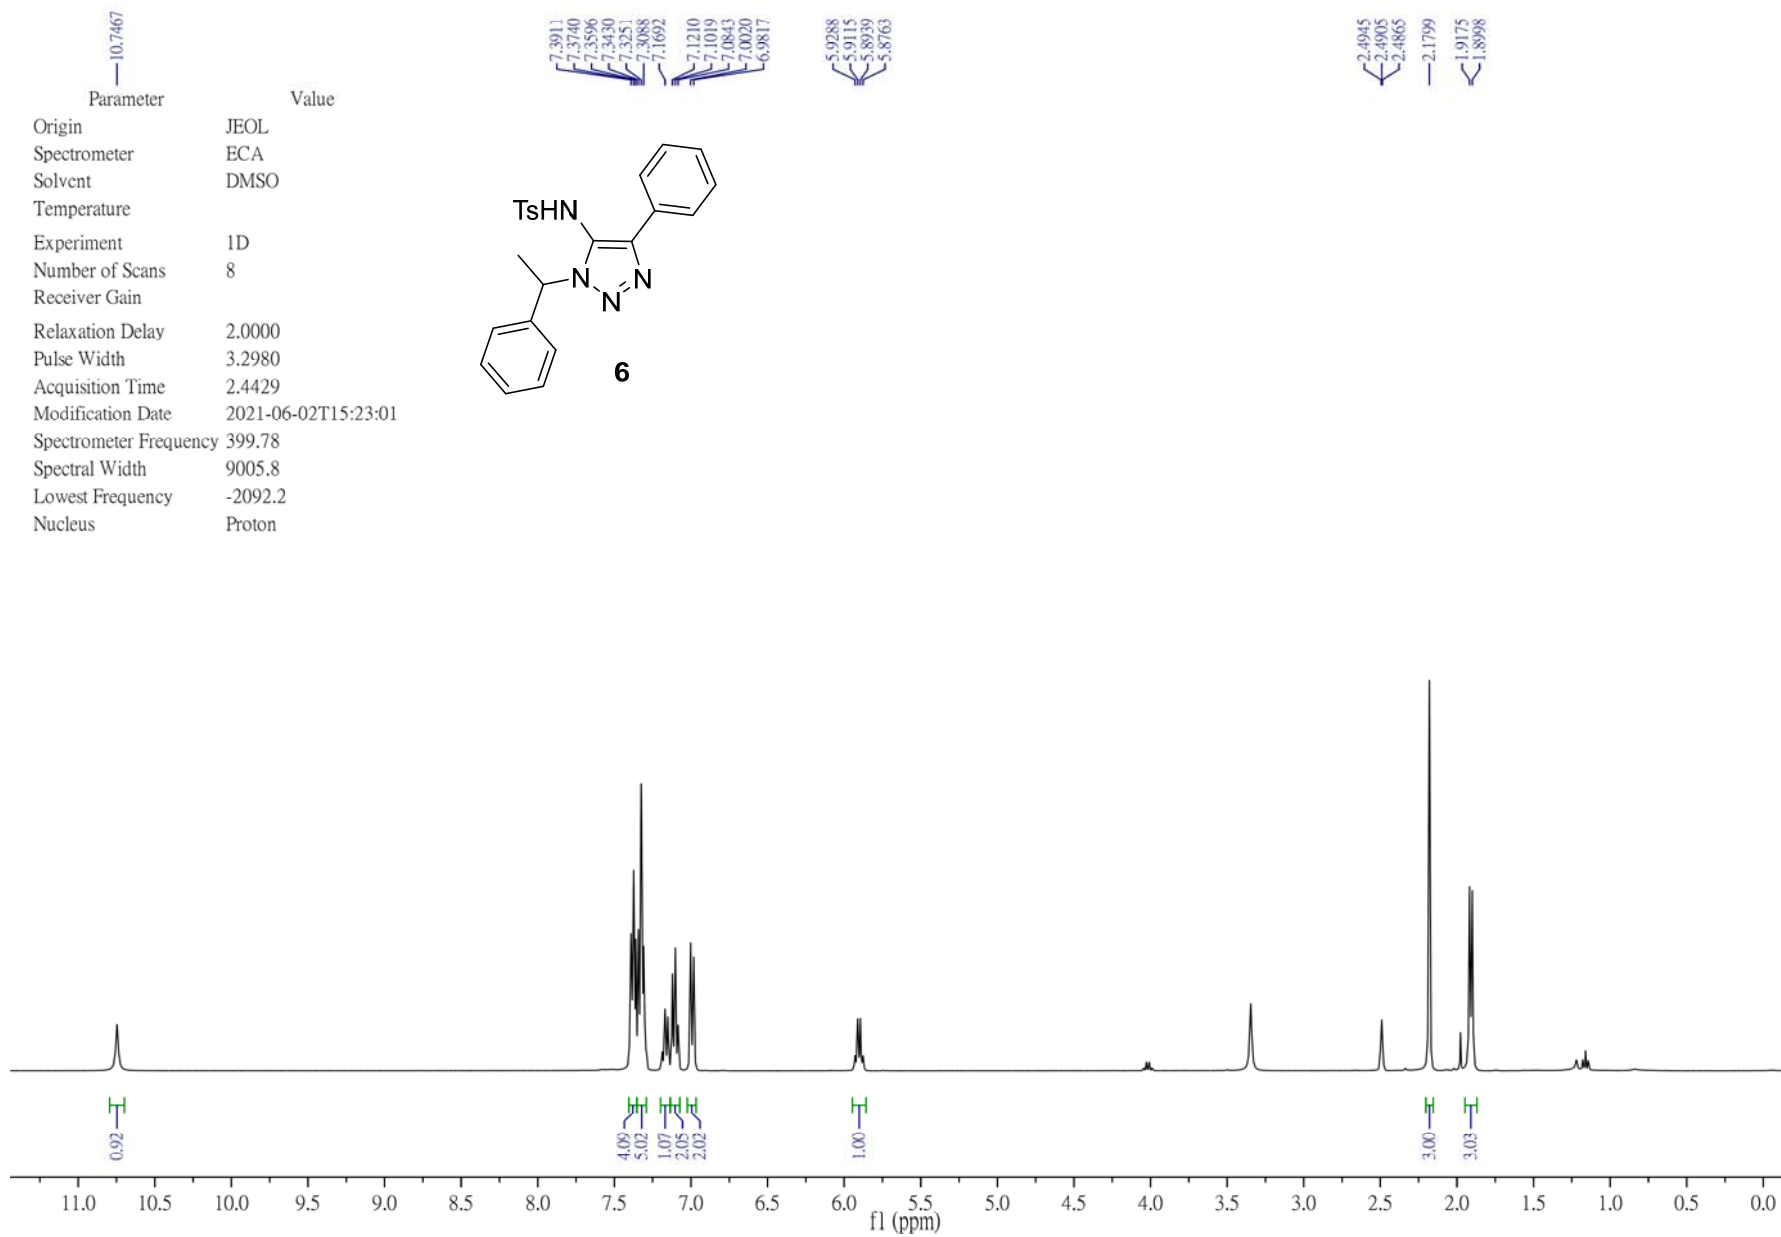

| Parameter              | Value               |
|------------------------|---------------------|
| Origin                 | JEOL                |
| Spectrometer           | ECA                 |
| Solvent                | DMSO                |
| Temperature            |                     |
| Experiment             | 1D                  |
| Number of Scans        | 371                 |
| Receiver Gain          |                     |
| Relaxation Delay       | 2.0000              |
| Pulse Width            | 4.7316              |
| Acquisition Time       | 0.6336              |
| Modification Date      | 2021-06-02T15:40:16 |
| Spectrometer Frequency | 100.53              |
| Spectral Width         | 31565.7             |
| Lowest Frequency       | -5730.7             |
| Nucleus                | Carbon13            |

- 144.2286
- 141.6513
- 140.9165
- 136.7130
- 130.0054
- 129.7817
- 129.2423
- 128.5133
- 127.8783
- 127.2159
- 127.0522
- 127.0365
- 126.5168
- 56.8219
- 40.6557
- 40.4471
- 40.2387
- 39.8209
- 39.6116
- 39.4028
- 21.7717
- 21.4090

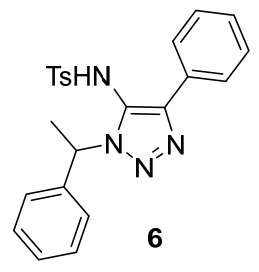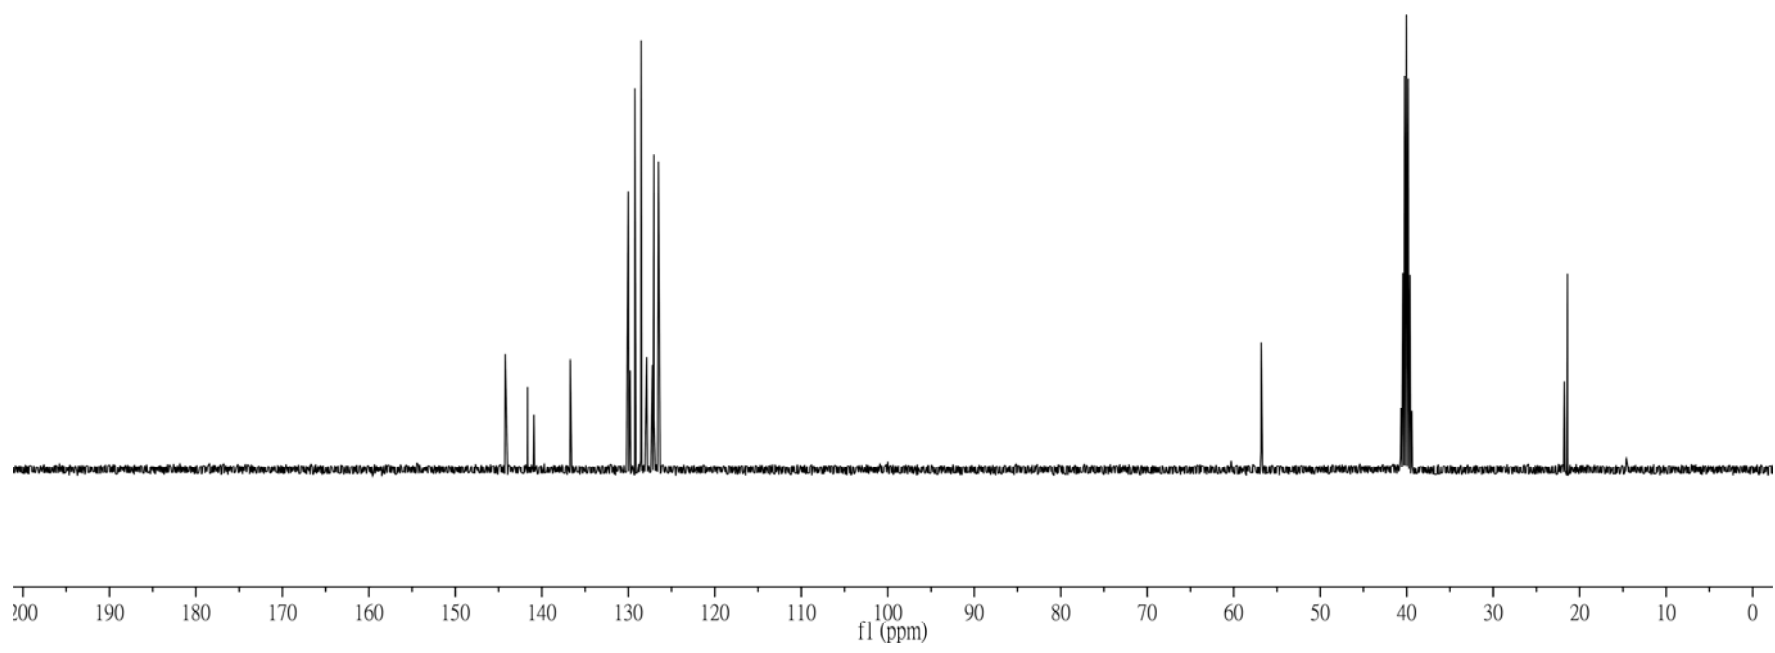

| Parameter              | Value  |
|------------------------|--------|
| Origin                 | Varian |
| Spectrometer           | vnmr5  |
| Solvent                | cdcl3  |
| Temperature            | 20.0   |
| Pulse Sequence         | s2pul  |
| Experiment             | 1D     |
| Number of Scans        | 12     |
| Receiver Gain          | 30     |
| Relaxation Delay       | 1.0000 |
| Pulse Width            | 0.0000 |
| Acquisition Time       | 2.5559 |
| Spectrometer Frequency | 399.76 |
| Spectral Width         | 6410.3 |
| Lowest Frequency       | -800.2 |
| Nucleus                | 1H     |

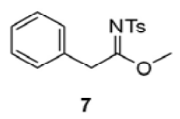

7.8462  
7.8225  
7.3600  
7.3551  
7.3349  
7.3155  
7.3062  
7.2853  
7.2675

4.2563  
3.7077  
2.4281

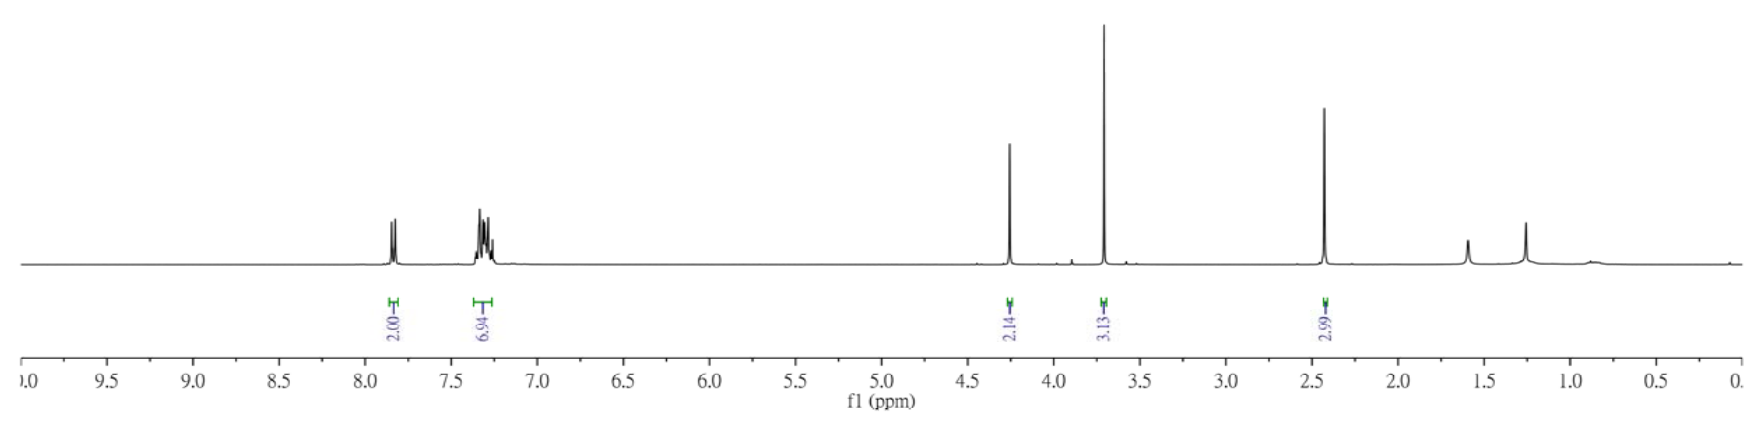

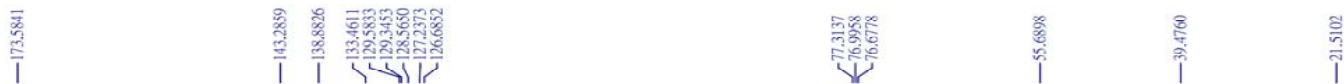

| Parameter              | Value   |
|------------------------|---------|
| Origin                 | Varian  |
| Spectrometer           | nmrs    |
| Solvent                | cdcl3   |
| Temperature            | 20.0    |
| Pulse Sequence         | s2pul   |
| Experiment             | 1D      |
| Number of Scans        | 184     |
| Receiver Gain          | 30      |
| Relaxation Delay       | 2.0000  |
| Pulse Width            | 0.0000  |
| Acquisition Time       | 1.3107  |
| Spectrometer Frequency | 100.53  |
| Spectral Width         | 25000.0 |
| Lowest Frequency       | -1445.2 |
| Nucleus                | 13C     |

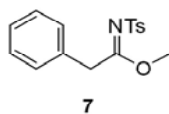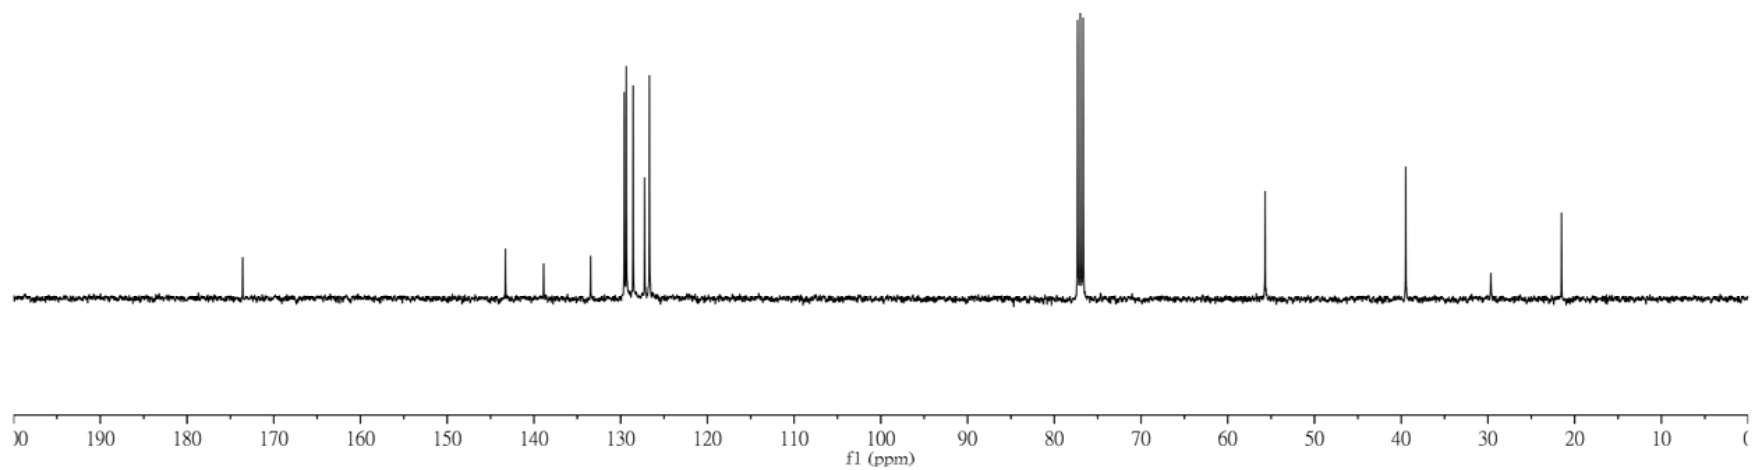

**d-acetone  
solent blank**

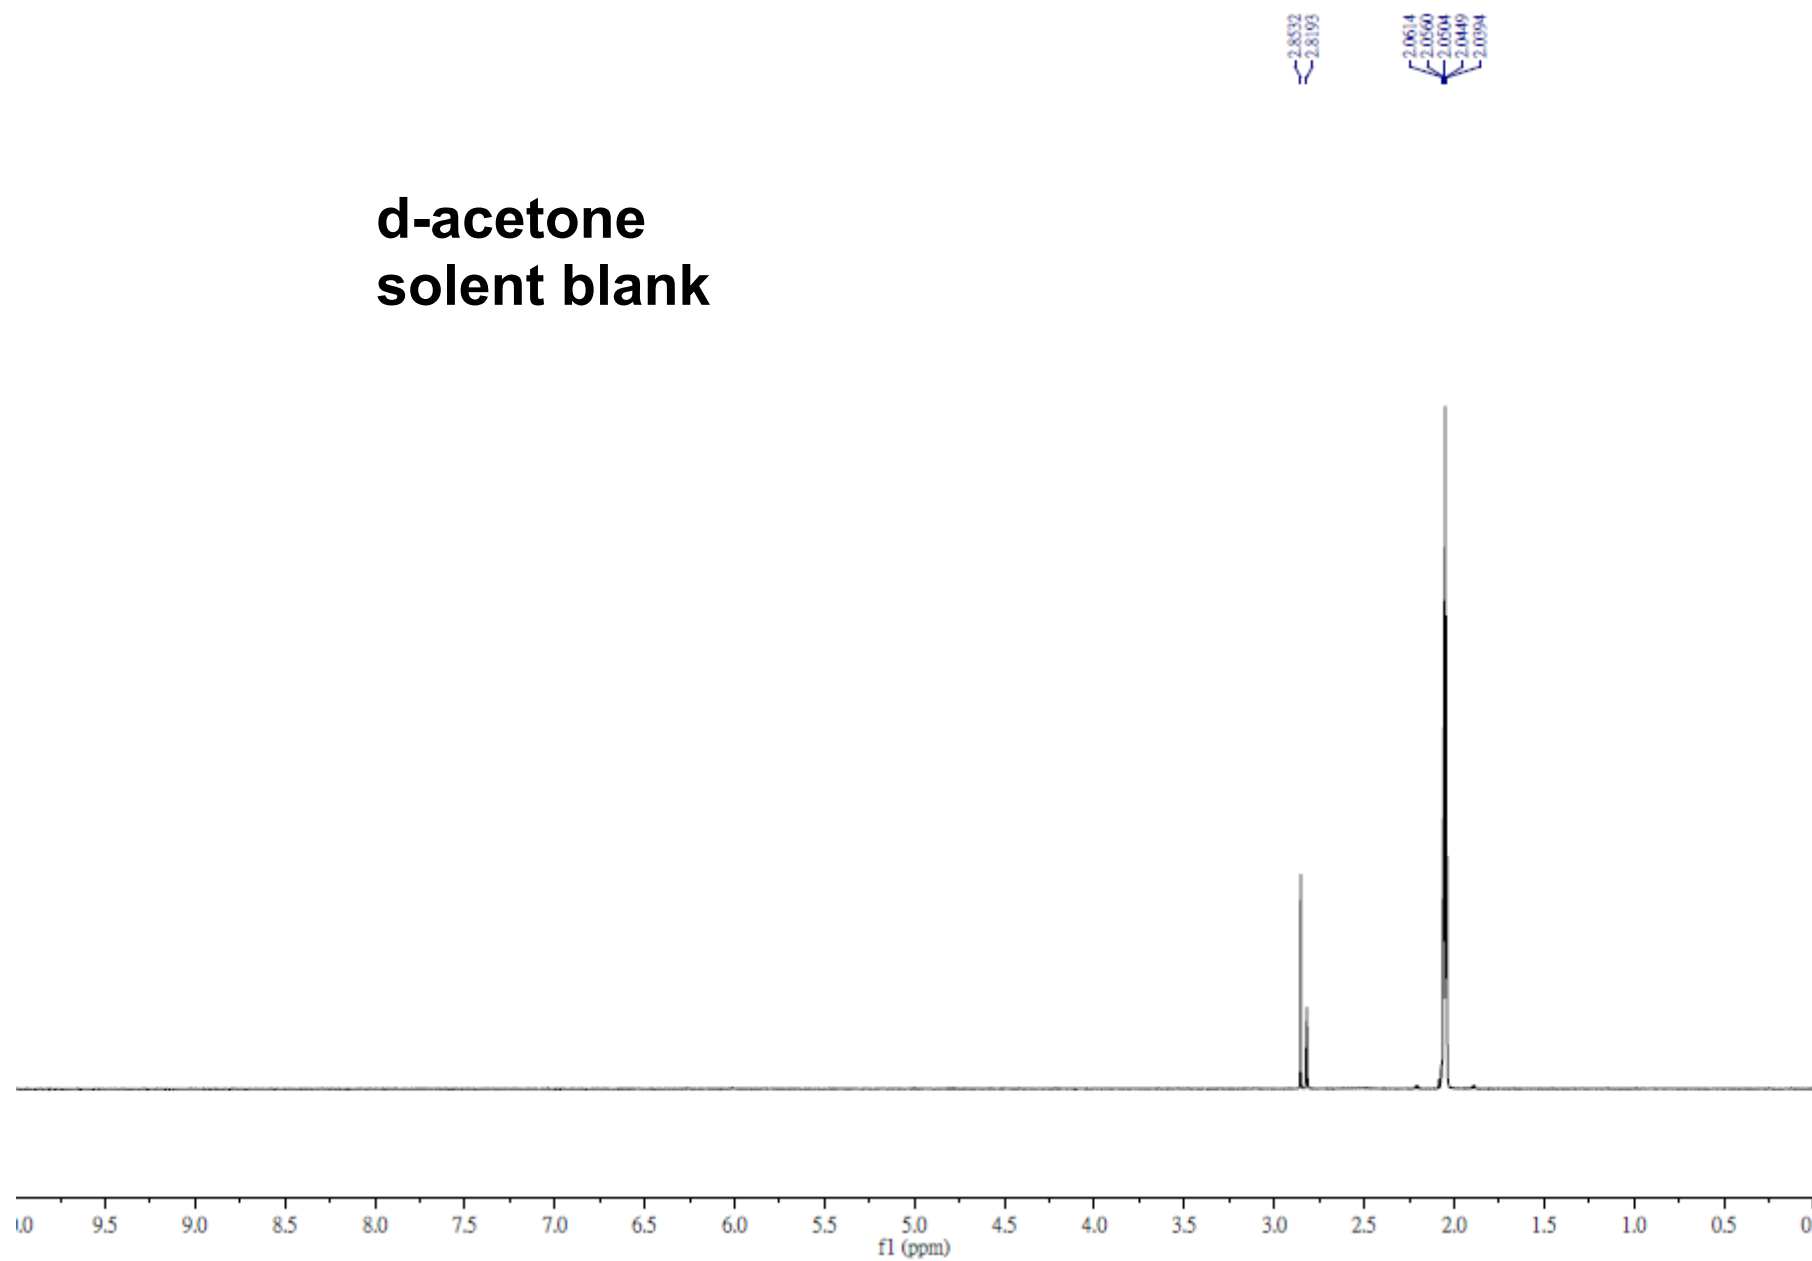

Supplement: d2cc06708k1.pdf [file d2cc06708k1.pdf]
